# Supplementary material for: Deciphering the underlying immune network of the potato defense response inhibition by Phytophthora infestans nuclear effector Pi07586 through transcriptome analysis
Source: Front Plant Sci. 2023 Sep 22;14:1269959. doi: 10.3389/fpls.2023.1269959 (PMC10556245; doi:10.3389/fpls.2023.1269959)
Supplement: Supplementary file 2 [file Table_1.xlsx]

## Sheet: Sheet1
Statistics of sequencing data
SampleID	ReadSum	BaseSum	GC(%)	N(%)	Q20(%)	Q30(%)
Désirée-1	19506297	5834460308	42.56	0	97.45	92.63
Désirée-2	22375449	6696995836	42.64	0	97.43	92.64
Désirée-3	21249624	6341113470	42.59	0	97.5	92.81
Lines 2-1	21117405	6301744656	42.62	0	97.54	92.89
Lines 2-2	21514670	6436713180	42.6	0	97.02	91.7
Lines 2-3	19191188	5721860922	42.83	0	97.53	92.88
Lines 10-1	21917965	6559690028	42.56	0	97.24	92.19
Lines 10-2	19237214	5756225660	42.5	0	97.5	92.76
Lines 10-3	21421281	6411126648	42.55	0	97.67	93.13
SampleID: Sample name.
ReadSum: Total number of pair-end reads in clean data.
BaseSum: Total base number in clean data.
GC(%): GC content in clean data.
N(%): Percentage of N in clean data.
Q20(%): The percentage of bases with a Q-score higher than 20 in clean data.
Q30(%): The percentage of bases with a Q-score higher than 20 in clean data.
