# Supplementary material for: Deciphering the underlying immune network of the potato defense response inhibition by Phytophthora infestans nuclear effector Pi07586 through transcriptome analysis
Source: Front Plant Sci. 2023 Sep 22;14:1269959. doi: 10.3389/fpls.2023.1269959 (PMC10556245; doi:10.3389/fpls.2023.1269959)
Supplement: Supplementary file 3 [file Table_2.xlsx]

## Sheet: Sheet1
Statistics on mapping ratio of sequencing data against the reference genome
Sample	Total Reads	Mapped Reads	Uniq Mapped Reads	Multiple Map Reads	Reads Map to '+'	Reads Map to '-'
Désirée-1	39012594	34,260,167 (87.82%)	32,779,000 (84.02%)	1,481,167 (3.80%)	18,595,734 (47.67%)	18,548,930 (47.55%)
Désirée-2	44750898	39,070,285 (87.31%)	37,165,778 (83.05%)	1,904,507 (4.26%)	21,612,525 (48.30%)	21,574,380 (48.21%)
Désirée-3	42499248	37,096,088 (87.29%)	35,339,699 (83.15%)	1,756,389 (4.13%)	20,412,600 (48.03%)	20,374,351 (47.94%)
Lines 2-1	42234810	36,884,608 (87.33%)	35,374,169 (83.76%)	1,510,439 (3.58%)	19,871,482 (47.05%)	19,846,920 (46.99%)
Lines 2-2	43029340	37,312,267 (86.71%)	35,713,236 (83.00%)	1,599,031 (3.72%)	20,210,165 (46.97%)	20,191,797 (46.93%)
Lines 2-3	38382376	33,640,357 (87.65%)	31,873,969 (83.04%)	1,766,388 (4.60%)	18,870,274 (49.16%)	18,840,012 (49.09%)
Lines 10-1	43835930	38,459,374 (87.73%)	36,991,417 (84.39%)	1,467,957 (3.35%)	20,617,665 (47.03%)	20,607,710 (47.01%)
Lines 10-2	38474428	33,899,234 (88.11%)	32,641,514 (84.84%)	1,257,720 (3.27%)	18,130,787 (47.12%)	18,117,950 (47.09%)
Lines 10-3	42842562	37,467,321 (87.45%)	36,065,345 (84.18%)	1,401,976 (3.27%)	20,039,983 (46.78%)	20,024,123 (46.74%)
Sample: Sample name.
Total Reads: Number of clean reads.
Mapped Reads: Number of mapped reads and their percentage in total clean reads.
Uniq Mapped Reads: Number of reads mapped to the unique position and its percentage in total clean reads.
Multiple Map Reads: Number of reads mapped to multiple positions and its percentage in total clean reads.
Reads Map to '+': Number of reads only mapped to + the strand of the reference genome and its percentage in total clean reads.
Reads Map to '-': Number of reads only mapped to – the strand of the reference genome and its percentage in total clean reads.
