# Supplementary material for: Deciphering the underlying immune network of the potato defense response inhibition by Phytophthora infestans nuclear effector Pi07586 through transcriptome analysis
Source: Front Plant Sci. 2023 Sep 22;14:1269959. doi: 10.3389/fpls.2023.1269959 (PMC10556245; doi:10.3389/fpls.2023.1269959)
Supplement: Supplementary file 4 [file Table_3.xls]

## Sheet: DEGs in the Pi07586 transgenic 
#ID	Désirée-1_Count	Désirée-2_Count	Désirée-3_Count	Line2-1_Count	Line2-2_Count	Line2-3_Count	Line10-1_Count	Line10-2_Count	Line10-3_Count	Désirée-1_FPKM	Désirée-2_FPKM	Désirée-3_FPKM	Line2-1_FPKM	Line2-2_FPKM	Line2-3_FPKM	Line10-1_FPKM	Line10-2_FPKM	Line10-3_FPKM	FDR	log2FC	regulated	COG_class	COG_class_annotation	GO_annotation	KEGG_annotation	KEGG_pathway_annotation	KOG_class	KOG_class_annotation	Pfam_annotation	Swiss-Prot_annotation	eggNOG_class	eggNOG_class_annotation	NR_annotation
gene.Soltu.DM.02G022910.1	128	186	90	296	243	282	353	455	381	2.76752	3.56251	1.80016	5.68164	5.29118	5.55054	7.08029	9.05082	8.5552	8.66573e-05	1.276	up	[IQ]	Lipid transport and metabolism;; Secondary metabolites biosynthesis, transport and catabolism	Molecular Function: catalytic activity (GO:0003824);;	K01913|5.9e-107|qsu:112007287|K01913 acetate/butyrate---CoA ligase [EC:6.2.1.1 6.2.1.2] | (RefSeq) acetate/butyrate--CoA ligase AAE7, peroxisomal	Glycolysis / Gluconeogenesis (ko00010);; Pyruvate metabolism (ko00620);; Glyoxylate and dicarboxylate metabolism (ko00630);; Butanoate metabolism (ko00650);; Carbon metabolism (ko01200)	[I]	Lipid transport and metabolism	AMP-binding enzyme	Probable acyl-activating enzyme 1, peroxisomal OS=Arabidopsis thaliana OX=3702 GN=AAE1 PE=2 SV=1	IQ	Lipid transport and metabolism;; Secondary metabolites biosynthesis, transport and catabolism	PREDICTED: probable acyl-activating enzyme 1, peroxisomal [Solanum tuberosum]
gene.Soltu.DM.07G021660.1	6	14	13	35	33	46	33	28	34	0.070364	0.141593	0.137304	0.375919	0.390152	0.497518	0.360629	0.303413	0.420661	0.000382984	1.60763	up	[T]	Signal transduction mechanisms	Molecular Function: protein serine/threonine kinase activity (GO:0004674);; Molecular Function: ATP binding (GO:0005524);; Cellular Component: integral component of membrane (GO:0016021);; Biological Process: recognition of pollen (GO:0048544);;	K13416|8.6e-61|oeu:111394691|K13416 brassinosteroid insensitive 1-associated receptor kinase 1 [EC:2.7.10.1 2.7.11.1] | (RefSeq) BRASSINOSTEROID INSENSITIVE 1-associated receptor kinase 1-like isoform X1	MAPK signaling pathway - plant (ko04016);; Plant hormone signal transduction (ko04075);; Plant-pathogen interaction (ko04626)	--	--	Protein kinase domain	G-type lectin S-receptor-like serine/threonine-protein kinase SD2-5 OS=Arabidopsis thaliana OX=3702 GN=SD25 PE=1 SV=1	T	Signal transduction mechanisms	hypothetical protein EJD97_017456 [Solanum chilense]
gene.Soltu.DM.08G027250.2	376	352	336	952	706	929	2323	2333	2591	20.5196	17.0872	17.0802	46.2748	38.9275	46.2303	117.707	117.378	147.149	1.37993e-05	2.17701	up	--	--	Molecular Function: serine-type endopeptidase inhibitor activity (GO:0004867);; Biological Process: response to wounding (GO:0009611);;	K20769|2.9e-07|mesc:110611169|K20769 fatty acid omega-hydroxylase [EC:1.14.-.-] | (RefSeq) cytochrome P450 94A2-like	Cutin, suberine and wax biosynthesis (ko00073)	--	--	Potato inhibitor I family	Ethylene-responsive proteinase inhibitor 1 OS=Solanum lycopersicum OX=4081 PE=3 SV=1	--	--	PREDICTED: ethylene-responsive proteinase inhibitor 1 [Solanum tuberosum]
gene.Soltu.DM.02G012460.3	986	1294	1468	929	5048	6117	4655	4442	3671	30.512	35.5549	42.2927	25.5839	157.661	172.404	133.585	126.544	118.062	0.00942449	1.68274	up	--	--	Cellular Component: chloroplast thylakoid membrane (GO:0009535);; Cellular Component: photosystem I reaction center (GO:0009538);; Cellular Component: chloroplast envelope (GO:0009941);; Cellular Component: plastoglobule (GO:0010287);; Biological Process: photosynthesis (GO:0015979);; Cellular Component: integral component of membrane (GO:0016021);; Molecular Function: protein domain specific bin…	K02694|6.7e-125|sot:102585281|K02694 photosystem I subunit III | (RefSeq) photosystem I reaction center subunit III, chloroplastic-like	Photosynthesis (ko00195)	--	--	Photosystem I reaction centre subunit III	Photosystem I reaction center subunit III, chloroplastic OS=Flaveria trinervia OX=4227 GN=PSAF PE=2 SV=1	S	Function unknown	PREDICTED: photosystem I reaction center subunit III, chloroplastic-like [Solanum tuberosum]
gene.Soltu.DM.09G000740.1	572	533	1068	290	240	367	232	567	330	6.28803	5.19348	10.9242	2.83574	2.65719	3.67164	2.36238	5.72824	3.75875	0.00392416	-1.17564	down	[I]	Lipid transport and metabolism	Molecular Function: acetyl-CoA carboxylase activity (GO:0003989);; Biological Process: fatty acid biosynthetic process (GO:0006633);; Cellular Component: acetyl-CoA carboxylase complex (GO:0009317);;	K01962|0.0e+00|sot:102583167|K01962 acetyl-CoA carboxylase carboxyl transferase subunit alpha [EC:6.4.1.2 2.1.3.15] | (RefSeq) acetyl-coenzyme A carboxylase carboxyl transferase subunit alpha, chloroplastic	Fatty acid biosynthesis (ko00061);; Pyruvate metabolism (ko00620);; Propanoate metabolism (ko00640);; Carbon metabolism (ko01200);; Fatty acid metabolism (ko01212)	--	--	Acetyl co-enzyme A carboxylase carboxyltransferase alpha subunit	Acetyl-coenzyme A carboxylase carboxyl transferase subunit alpha, chloroplastic OS=Arabidopsis thaliana OX=3702 GN=CAC3 PE=1 SV=1	I	Lipid transport and metabolism	PREDICTED: acetyl-coenzyme A carboxylase carboxyl transferase subunit alpha, chloroplastic [Solanum tuberosum]
gene.Soltu.DM.04G007800.1	12	13	12	185	131	131	66	155	99	0.580596	0.574335	0.564551	8.45594	6.7908	6.09872	3.1303	7.30986	5.25139	2.70603e-16	3.29569	up	--	--	--	--	--	--	--	--	--	--	--	histone H3.v1 [Solanum lycopersicum]
gene.Soltu.DM.12G009370.1	311	343	405	843	788	1090	1002	1377	1091	6.91958	6.77303	8.39936	16.7052	17.7107	22.0945	20.6934	28.2227	25.2351	9.66646e-12	1.48904	up	[I]	Lipid transport and metabolism	Biological Process: lipid metabolic process (GO:0006629);; Cellular Component: integral component of membrane (GO:0016021);; Molecular Function: oxidoreductase activity, acting on paired donors, with oxidation of a pair of donors resulting in the reduction of molecular oxygen to two molecules of water (GO:0016717);;	K10256|2.6e-172|cann:107851294|K10256 omega-6 fatty acid desaturase / acyl-lipid omega-6 desaturase (Delta-12 desaturase) [EC:1.14.19.6 1.14.19.22] | (RefSeq) delta(12)-acyl-lipid-desaturase-like	Biosynthesis of unsaturated fatty acids (ko01040);; Fatty acid metabolism (ko01212)	--	--	Fatty acid desaturase	Delta(12)-fatty-acid desaturase FAD2 OS=Vernicia fordii OX=73154 GN=FAD2 PE=1 SV=1	I	Lipid transport and metabolism	delta(12)-fatty-acid desaturase FAD2-like [Solanum pennellii]
gene.Soltu.DM.09G026680.1	56	60	77	89	144	125	243	255	173	0.931147	0.885202	1.20687	1.33092	2.4477	1.91411	3.78975	3.95896	3.03062	0.00396577	1.36689	up	[GEPR]	Carbohydrate transport and metabolism;; Amino acid transport and metabolism;; Inorganic ion transport and metabolism;; General function prediction only	Molecular Function: inorganic phosphate transmembrane transporter activity (GO:0005315);; Biological Process: phosphate ion transport (GO:0006817);; Cellular Component: integral component of membrane (GO:0016021);;	K08176|5.4e-311|sot:102589570|K08176 MFS transporter, PHS family, inorganic phosphate transporter | (RefSeq) pt3; inorganic phosphate transporter 1-4-like	--	[P]	Inorganic ion transport and metabolism	Sugar (and other) transporter	Low affinity inorganic phosphate transporter 3 OS=Petunia hybrida OX=4102 GN=PT3 PE=2 SV=1	G	Carbohydrate transport and metabolism	PREDICTED: inorganic phosphate transporter 1-4-like [Solanum tuberosum]
gene.Soltu.DM.10G002550.2	141	164	105	56	59	79	58	79	84	1.47198	1.52041	1.01981	0.517292	0.619738	0.746661	0.561479	0.754068	0.907418	0.000655883	-1.0329	down	--	--	--	K19041|0.0e+00|sot:102588519|K19041 E3 ubiquitin-protein ligase RNF38/44 [EC:2.3.2.27] | (RefSeq) uncharacterized LOC102588519	--	[O]	Posttranslational modification, protein turnover, chaperones	Ring finger domain	Probable E3 ubiquitin-protein ligase ZFP1 OS=Oryza sativa subsp. japonica OX=39947 GN=ZFP1 PE=1 SV=1	O	Posttranslational modification, protein turnover, chaperones	PREDICTED: uncharacterized protein LOC102588519 [Solanum tuberosum]
gene.Soltu.DM.05G024230.1	20	44	34	104	94	102	83	116	57	0.563865	1.0895	0.887673	2.59887	2.66965	2.60189	2.154	3.00719	1.64981	7.00307e-06	1.44282	up	--	--	--	--	--	--	--	--	--	--	--	PREDICTED: uncharacterized protein LOC102594119 [Solanum tuberosum]
gene.Soltu.DM.10G019050.1	3	0	5	44	26	63	65	137	83	0.193352	0	0.288375	2.9841	2.01697	4.40612	4.6057	9.74222	6.62061	8.69087e-08	4.63116	up	--	--	Molecular Function: peroxidase activity (GO:0004601);; Biological Process: response to oxidative stress (GO:0006979);; Molecular Function: heme binding (GO:0020037);; Molecular Function: metal ion binding (GO:0046872);;	K00430|6.2e-70|sot:102592776|K00430 peroxidase [EC:1.11.1.7] | (RefSeq) cationic peroxidase 1-like	Phenylpropanoid biosynthesis (ko00940)	--	--	Peroxidase	Cationic peroxidase 1 OS=Arachis hypogaea OX=3818 GN=PNC1 PE=1 SV=2	S	Function unknown	PREDICTED: cationic peroxidase 1-like [Solanum tuberosum]
gene.Soltu.DM.08G020930.1	42	64	47	266	203	345	249	227	171	0.598191	0.820409	0.631127	3.42622	2.97206	4.5551	3.33851	3.02502	2.57763	6.45548e-21	2.18656	up	[E]	Amino acid transport and metabolism	Molecular Function: urea transmembrane transporter activity (GO:0015204);; Cellular Component: integral component of membrane (GO:0016021);;	K20989|4.2e-255|sot:102589439|K20989 urea-proton symporter | (RefSeq) urea-proton symporter DUR3-like	--	[E]	Amino acid transport and metabolism	Sodium:solute symporter family	Urea-proton symporter DUR3 OS=Arabidopsis thaliana OX=3702 GN=DUR3 PE=1 SV=1	E	Amino acid transport and metabolism	PREDICTED: LOW QUALITY PROTEIN: urea-proton symporter DUR3-like [Solanum tuberosum]
Solanum_tuberosum_newGene_5959	11	7	6	6	18	31	72	131	112	0.11157	0.060675	0.052806	0.053101	0.192556	0.302834	0.722184	1.30332	1.43731	0.00903842	2.91789	up	--	--	--	--	--	--	--	--	--	S	Function unknown	PREDICTED: uncharacterized protein LOC107057783 [Solanum tuberosum]
gene.Soltu.DM.03G023650.1	48	32	21	71	57	72	519	688	626	1.85363	1.10608	0.759432	2.45935	2.25202	2.5617	18.9019	24.8742	25.5628	0.00608161	3.30791	up	--	--	Molecular Function: serine-type endopeptidase inhibitor activity (GO:0004867);;	--	--	--	--	Potato type II proteinase inhibitor family	Proteinase inhibitor type-2 CEVI57 OS=Solanum lycopersicum OX=4081 GN=CEVI57 PE=2 SV=1	--	--	proteinase inhibitor type-2 CEVI57 precursor [Solanum lycopersicum]
gene.Soltu.DM.12G009390.2	176	222	318	513	571	666	688	781	712	3.86933	4.33377	6.50089	10.0294	12.6656	13.318	14.0093	15.7841	16.2473	2.8895e-08	1.40432	up	[I]	Lipid transport and metabolism	Biological Process: lipid metabolic process (GO:0006629);; Cellular Component: integral component of membrane (GO:0016021);; Molecular Function: oxidoreductase activity, acting on paired donors, with oxidation of a pair of donors resulting in the reduction of molecular oxygen to two molecules of water (GO:0016717);;	K10256|7.6e-174|cann:107851294|K10256 omega-6 fatty acid desaturase / acyl-lipid omega-6 desaturase (Delta-12 desaturase) [EC:1.14.19.6 1.14.19.22] | (RefSeq) delta(12)-acyl-lipid-desaturase-like	Biosynthesis of unsaturated fatty acids (ko01040);; Fatty acid metabolism (ko01212)	--	--	Fatty acid desaturase	Delta(12)-fatty-acid desaturase FAD2 OS=Vernicia fordii OX=73154 GN=FAD2 PE=1 SV=1	I	Lipid transport and metabolism	delta(12)-fatty-acid desaturase FAD2-like [Solanum pennellii]
gene.Soltu.DM.09G021850.1	80	120	106	552	483	801	385	296	300	2.43473	3.23522	2.98809	14.9496	14.8136	22.1843	10.8587	8.28953	9.4785	3.95485e-11	2.12649	up	--	--	Cellular Component: integral component of membrane (GO:0016021);;	--	--	--	--	--	--	S	Function unknown	PREDICTED: basic proline-rich protein-like isoform X3 [Solanum tuberosum]
gene.Soltu.DM.09G026020.1	15	14	28	86	50	81	71	42	70	0.365535	0.304139	0.615927	1.87234	1.22985	1.78379	1.59734	0.940541	1.77946	6.735e-05	1.73856	up	[Q]	Secondary metabolites biosynthesis, transport and catabolism	Molecular Function: oxidoreductase activity (GO:0016491);; Molecular Function: metal ion binding (GO:0046872);;	K13229|5.1e-55|ats:109766943|K13229 2,4-dihydroxy-1,4-benzoxazin-3-one-glucoside dioxygenase [EC:1.14.11.59] | (RefSeq) LOC109766943; DIBOA-glucoside dioxygenase BX6-like	Benzoxazinoid biosynthesis (ko00402)	[QR]	Secondary metabolites biosynthesis, transport and catabolism;; General function prediction only	2OG-Fe(II) oxygenase superfamily	1-aminocyclopropane-1-carboxylate oxidase homolog 7 OS=Arabidopsis thaliana OX=3702 GN=At1g04380 PE=1 SV=1	S	Function unknown	PREDICTED: LOW QUALITY PROTEIN: 1-aminocyclopropane-1-carboxylate oxidase homolog, partial [Solanum tuberosum]
gene.Soltu.DM.10G022880.1	57	56	50	160	86	127	138	71	155	1.90797	1.65555	1.55962	4.81216	2.90987	3.90133	4.31095	2.18439	5.44607	0.00562632	1.11761	up	[L]	Replication, recombination and repair	--	--	--	--	--	SOUL heme-binding protein	--	--	--	PREDICTED: uncharacterized protein LOC102584988 [Solanum tuberosum]
gene.Soltu.DM.09G004590.1	30	35	45	315	236	249	162	144	141	1.04574	1.08288	1.44335	9.83892	8.36984	7.95332	5.26884	4.63904	5.15153	8.43032e-14	2.421	up	--	--	--	--	--	--	--	VQ motif	--	--	--	PREDICTED: uncharacterized protein LOC107058867 [Solanum tuberosum]
gene.Soltu.DM.09G017080.1	38	61	39	129	84	150	348	404	361	0.857613	1.2462	0.827876	2.6282	1.93473	3.13366	7.4196	8.56486	8.63866	0.000103347	2.40143	up	[CR]	Energy production and conversion;; General function prediction only	Molecular Function: oxidoreductase activity (GO:0016491);;	K00224|6.0e-183|sot:102582629|K00224 chloroplastic oxoene reductase [EC:1.3.1.-] | (RefSeq) putative quinone-oxidoreductase homolog, chloroplastic	alpha-Linolenic acid metabolism (ko00592)	[CR]	Energy production and conversion;; General function prediction only	Zinc-binding dehydrogenase	Chloroplast envelope quinone oxidoreductase homolog OS=Arabidopsis thaliana OX=3702 GN=CEQORH PE=1 SV=1	C	Energy production and conversion	PREDICTED: putative quinone-oxidoreductase homolog, chloroplastic [Solanum tuberosum]
gene.Soltu.DM.02G019450.1	16	32	0	89	51	52	146	191	165	0.262459	0.466027	0	1.31336	0.8484	0.784658	2.24622	2.92097	2.84449	0.00476485	2.85583	up	--	--	Molecular Function: magnesium ion binding (GO:0000287);; Molecular Function: terpene synthase activity (GO:0010333);;	K14173|2.3e-252|spen:107010686|K14173 alpha-farnesene synthase [EC:4.2.3.46] | (RefSeq) alpha-farnesene synthase-like	Sesquiterpenoid and triterpenoid biosynthesis (ko00909)	--	--	Terpene synthase family, metal binding domain	Alpha-farnesene synthase OS=Ricinus communis OX=3988 GN=TPS7 PE=1 SV=2	O	Posttranslational modification, protein turnover, chaperones	alpha-farnesene synthase-like [Solanum pennellii]
gene.Soltu.DM.12G002450.1	202	249	241	608	515	584	397	513	385	2.18712	2.402	2.43591	5.87679	5.64339	5.77354	3.99673	5.12379	4.33719	9.42953e-13	1.04626	up	--	--	Cellular Component: integral component of membrane (GO:0016021);;	--	--	--	--	Plant phosphoribosyltransferase C-terminal	FT-interacting protein 3 OS=Arabidopsis thaliana OX=3702 GN=FTIP3 PE=1 SV=1	--	--	PREDICTED: protein QUIRKY-like [Solanum tuberosum]
gene.Soltu.DM.03G034040.2	64	96	70	39	38	34	36	24	27	1.24744	1.65956	1.2771	0.673948	0.738587	0.589927	0.645362	0.426912	0.546134	1.20157e-05	-1.27255	down	--	--	--	--	--	--	--	LysM domain	LysM domain-containing GPI-anchored protein 1 OS=Arabidopsis thaliana OX=3702 GN=LYM1 PE=1 SV=1	S	Function unknown	PREDICTED: lysM domain-containing GPI-anchored protein 1-like isoform X1 [Solanum tuberosum]
gene.Soltu.DM.07G005320.2	68	53	46	159	146	153	90	78	94	0.849364	0.586522	0.531694	1.77441	1.84668	1.7506	1.04278	0.903557	1.21916	0.00671772	1.02554	up	--	--	Molecular Function: protein serine/threonine kinase activity (GO:0004674);; Molecular Function: ATP binding (GO:0005524);; Cellular Component: integral component of membrane (GO:0016021);; Biological Process: recognition of pollen (GO:0048544);;	K24104|4.0e-26|thj:104799061|K24104 GPN-loop GTPase | (RefSeq) LOW QUALITY PROTEIN: uncharacterized protein LOC104799061	--	--	--	S-locus glycoprotein domain	G-type lectin S-receptor-like serine/threonine-protein kinase At2g19130 OS=Arabidopsis thaliana OX=3702 GN=At2g19130 PE=2 SV=1	T	Signal transduction mechanisms	PREDICTED: uncharacterized protein LOC102598425 [Solanum tuberosum]
gene.Soltu.DM.06G006870.1	25	9	22	76	83	79	68	92	61	1.08517	0.349957	0.884432	2.97217	3.67234	3.14815	2.75593	3.72052	2.76146	2.0386e-07	1.94986	up	--	--	Biological Process: cellular response to phosphate starvation (GO:0016036);;	--	--	--	--	--	SPX domain-containing protein 1 OS=Oryza sativa subsp. indica OX=39946 GN=SPX1 PE=3 SV=1	--	--	PREDICTED: SPX domain-containing protein 1-like [Nicotiana attenuata]
gene.Soltu.DM.10G003300.1	388	524	486	762	723	780	1375	1451	1390	12.6953	15.2272	14.7891	22.1736	23.8725	23.2343	41.7055	43.6848	47.2452	0.00122363	1.17887	up	[O]	Posttranslational modification, protein turnover, chaperones	Biological Process: response to acid chemical (GO:0001101);; Molecular Function: molecular_function (GO:0003674);; Molecular Function: catalytic activity (GO:0003824);; Molecular Function: glutathione transferase activity (GO:0004364);; Molecular Function: binding (GO:0005488);; Molecular Function: protein binding (GO:0005515);; Cellular Component: cellular_component (GO:0005575);; Cellular Compo…	K00799|4.3e-129|sot:102603110|K00799 glutathione S-transferase [EC:2.5.1.18] | (RefSeq) probable glutathione S-transferase	Glutathione metabolism (ko00480)	[O]	Posttranslational modification, protein turnover, chaperones	Glutathione S-transferase, N-terminal domain	Probable glutathione S-transferase parC OS=Nicotiana tabacum OX=4097 GN=PARC PE=2 SV=1	O	Posttranslational modification, protein turnover, chaperones	PREDICTED: probable glutathione S-transferase [Solanum tuberosum]
gene.Soltu.DM.09G005280.1	217	268	247	84	114	113	134	120	111	5.79338	6.36735	6.1411	1.97999	3.07266	2.7359	3.30717	2.95179	3.06619	4.81538e-08	-1.16662	down	[G]	Carbohydrate transport and metabolism	Molecular Function: hydrolase activity, hydrolyzing O-glycosyl compounds (GO:0004553);; Cellular Component: cell wall (GO:0005618);; Biological Process: xyloglucan metabolic process (GO:0010411);; Molecular Function: xyloglucan:xyloglucosyl transferase activity (GO:0016762);; Biological Process: cell wall macromolecule catabolic process (GO:0016998);; Biological Process: cell wall biogenesis (GO:…	K08235|7.0e-183|sot:102580643|K08235 xyloglucan:xyloglucosyl transferase [EC:2.4.1.207] | (RefSeq) probable xyloglucan endotransglucosylase/hydrolase protein 32	--	--	--	Glycosyl hydrolases family 16	Probable xyloglucan endotransglucosylase/hydrolase protein 32 OS=Arabidopsis thaliana OX=3702 GN=XTH32 PE=2 SV=1	G	Carbohydrate transport and metabolism	PREDICTED: probable xyloglucan endotransglucosylase/hydrolase protein 32 [Solanum tuberosum]
gene.Soltu.DM.10G015840.1	36	16	30	74	87	59	118	148	166	0.675875	0.259759	0.521877	1.25743	1.6938	1.0273	2.10623	2.62649	3.32468	0.000647831	1.93703	up	[R]	General function prediction only	Molecular Function: molecular_function (GO:0003674);; Molecular Function: catalytic activity (GO:0003824);; Biological Process: cellular aromatic compound metabolic process (GO:0006725);; Biological Process: biological_process (GO:0008150);; Biological Process: metabolic process (GO:0008152);; Biological Process: biosynthetic process (GO:0009058);; Biological Process: phenylpropanoid metabolic pr…	K23050|4.0e-173|sot:102586164|K23050 phenylcoumaran benzylic ether reductase [EC:1.3.1.-] | (RefSeq) CP100; isoflavone reductase homolog	--	--	--	NmrA-like family	Isoflavone reductase homolog OS=Solanum tuberosum OX=4113 PE=2 SV=1	S	Function unknown	isoflavone reductase homolog [Solanum tuberosum]
gene.Soltu.DM.09G029880.1	102	149	86	43	28	22	47	68	43	2.25246	2.92868	1.77095	0.838547	0.626533	0.436227	0.961967	1.38811	0.984667	0.00127143	-1.4693	down	--	--	Molecular Function: magnesium ion binding (GO:0000287);; Molecular Function: terpene synthase activity (GO:0010333);;	K15803|1.1e-142|nsy:104241247|K15803 (-)-germacrene D synthase [EC:4.2.3.75] | (RefSeq) germacrene C synthase-like	Sesquiterpenoid and triterpenoid biosynthesis (ko00909)	--	--	Terpene synthase family, metal binding domain	Germacrene C synthase OS=Solanum lycopersicum OX=4081 GN=SSTLE1 PE=1 SV=1	--	--	sesquiterpene synthase [Solanum habrochaites]
gene.Soltu.DM.01G050660.1	6752	7618	6757	1684	1647	2144	4071	3779	3391	288.692	289.166	268.942	64.0446	71.0053	83.4446	161.308	148.664	150.602	0.000254829	-1.37728	down	--	--	Cellular Component: plant-type cell wall (GO:0009505);; Biological Process: response to abscisic acid (GO:0009737);; Biological Process: response to gibberellin (GO:0009739);; Biological Process: response to brassinosteroid (GO:0009741);;	K03860|6.8e-08|nnu:104608881|K03860 phosphatidylinositol N-acetylglucosaminyltransferase subunit Q | (RefSeq) N-acetylglucosaminyl-phosphatidylinositol biosynthetic protein gpi1-like	Glycosylphosphatidylinositol (GPI)-anchor biosynthesis (ko00563)	--	--	Gibberellin regulated protein	Snakin-2 OS=Solanum tuberosum OX=4113 GN=SN2 PE=1 SV=1	O	Posttranslational modification, protein turnover, chaperones	snakin-2 precursor [Solanum tuberosum]
gene.Soltu.DM.03G015450.1	31	39	38	168	140	132	43	92	56	3.14869	3.473	3.58292	15.2373	14.3401	12.2122	4.0005	8.58081	5.84081	0.00585755	1.45959	up	--	--	Molecular Function: enzyme inhibitor activity (GO:0004857);;	K13459|2.7e-09|gab:108481360|K13459 disease resistance protein RPS2 | (RefSeq) probable disease resistance protein At1g61300	Plant-pathogen interaction (ko04626)	--	--	Plant invertase/pectin methylesterase inhibitor	21 kDa protein OS=Daucus carota OX=4039 PE=2 SV=1	S	Function unknown	PREDICTED: 21 kDa protein-like [Solanum tuberosum]
gene.Soltu.DM.06G009640.1	118	160	218	252	295	277	585	642	517	2.53229	3.05144	4.36228	4.81003	6.38373	5.41184	11.6601	12.7006	11.5595	0.00533552	1.335	up	--	--	--	K04125|2.1e-09|peq:110038145|K04125 gibberellin 2beta-dioxygenase [EC:1.14.11.13] | (RefSeq) gibberellin 2-beta-dioxygenase-like	Diterpenoid biosynthesis (ko00904)	--	--	--	--	S	Function unknown	PREDICTED: 1-aminocyclopropane-1-carboxylate oxidase [Solanum tuberosum]
gene.Soltu.DM.03G016600.1	94	101	76	188	159	178	284	263	239	8.61273	8.26088	6.46216	15.4275	14.7456	14.8672	24.2571	22.2769	22.8712	7.14409e-05	1.22396	up	--	--	Cellular Component: integral component of membrane (GO:0016021);;	K03363|2.2e-07|mtr:MTR_7g055590|K03363 cell division cycle 20, cofactor of APC complex | (RefSeq) transducin family protein/WD-40 repeat protein	Ubiquitin mediated proteolysis (ko04120)	--	--	LysM domain	--	S	Function unknown	PREDICTED: uncharacterized protein LOC107061649 [Solanum tuberosum]
gene.Soltu.DM.02G034520.1	0	0	0	254	49	0	21	383	74	0	0	0	6.61375	1.43607	0	0.566912	10.3516	2.24785	0.000312667	9.36794	up	--	--	--	--	--	--	--	--	--	S	Function unknown	PREDICTED: transcription initiation factor TFIID subunit 11 isoform X1 [Solanum tuberosum]
gene.Soltu.DM.04G026010.1	635	592	586	2079	1843	1991	7460	8378	7847	12.9181	10.6826	11.0803	37.6197	37.8106	36.862	140.655	156.825	165.827	7.32183e-05	3.00258	up	[R]	General function prediction only	Molecular Function: cellulase activity (GO:0008810);; Biological Process: cellulose catabolic process (GO:0030245);;	K01179|3.8e-99|nau:109238319|K01179 endoglucanase [EC:3.2.1.4] | (RefSeq) endoglucanase 9-like	Starch and sucrose metabolism (ko00500)	--	--	Glycosyl hydrolase family 9	Pathogen-related protein OS=Hordeum vulgare OX=4513 PE=2 SV=2	S	Function unknown	hypothetical protein FXO37_20341 [Capsicum annuum]
gene.Soltu.DM.07G028330.1	87	147	96	34	23	40	44	53	12	4.1179	6.1939	4.2246	1.40744	1.10151	1.70986	1.93591	2.31598	0.590782	0.00016972	-1.74763	down	--	--	--	--	--	--	--	--	--	--	--	hypothetical protein EJD97_015236 [Solanum chilense]
gene.Soltu.DM.05G014560.1	32	37	31	136	200	171	216	296	257	0.379761	0.389347	0.341398	1.46243	2.43938	1.88216	2.42453	3.30101	3.23802	6.33823e-14	2.63281	up	[T]	Signal transduction mechanisms	Molecular Function: peroxidase activity (GO:0004601);; Molecular Function: calcium ion binding (GO:0005509);; Cellular Component: integral component of membrane (GO:0016021);; Molecular Function: oxidoreductase activity, acting on NAD(P)H, oxygen as acceptor (GO:0050664);;	K13447|0.0e+00|sot:102578438|K13447 respiratory burst oxidase [EC:1.6.3.- 1.11.1.-] | (RefSeq) respiratory burst oxidase homolog protein E-like	MAPK signaling pathway - plant (ko04016);; Plant-pathogen interaction (ko04626)	[PQ]	Inorganic ion transport and metabolism;; Secondary metabolites biosynthesis, transport and catabolism	Ferric reductase NAD binding domain	Respiratory burst oxidase homolog protein E OS=Arabidopsis thaliana OX=3702 GN=RBOHE PE=2 SV=2	U	Intracellular trafficking, secretion, and vesicular transport	PREDICTED: respiratory burst oxidase homolog protein E-like [Solanum tuberosum]
gene.Soltu.DM.06G030710.1	25	27	21	55	48	85	132	129	104	0.734583	0.704907	0.578115	1.45091	1.44365	2.30458	3.65154	3.56426	3.2205	0.000204482	1.874	up	--	--	--	K02725|6.2e-34|nau:109221636|K02725 20S proteasome subunit alpha 6 [EC:3.4.25.1] | (RefSeq) proteasome subunit alpha type-1-like	Proteasome (ko03050)	--	--	Lateral organ boundaries (LOB) domain	LOB domain-containing protein 11 OS=Arabidopsis thaliana OX=3702 GN=LBD11 PE=2 SV=2	S	Function unknown	PREDICTED: LOB domain-containing protein 1-like [Solanum tuberosum]
gene.Soltu.DM.10G027330.1	70	61	45	183	160	226	161	249	140	1.12305	0.859903	0.671917	2.6112	2.58925	3.29252	2.38849	3.66865	2.3262	6.14352e-10	1.59205	up	--	--	Cellular Component: integral component of membrane (GO:0016021);; Molecular Function: transferase activity, transferring glycosyl groups (GO:0016757);;	K18134|3.9e-80|gab:108463406|K18134 EGF domain-specific O-GlcNAc transferase [EC:2.4.1.255] | (RefSeq) uncharacterized protein LOC108463406	Other types of O-glycan biosynthesis (ko00514)	[S]	Function unknown	Protein of unknown function (DUF563)	Xylan glycosyltransferase MUCI21 OS=Arabidopsis thaliana OX=3702 GN=MUCI21 PE=1 SV=1	S	Function unknown	PREDICTED: EGF domain-specific O-linked N-acetylglucosamine transferase-like [Solanum tuberosum]
gene.Soltu.DM.04G032780.1	345	447	509	1629	1463	1867	708	728	622	9.31585	10.7344	12.8143	39.2229	39.937	45.9841	17.7501	18.121	17.4696	0.000764456	1.34288	up	--	--	--	--	--	[R]	General function prediction only	C2H2-type zinc finger	Zinc finger protein ZAT10 OS=Arabidopsis thaliana OX=3702 GN=ZAT10 PE=2 SV=1	S	Function unknown	PREDICTED: LOW QUALITY PROTEIN: zinc finger protein ZAT10 [Solanum tuberosum]
gene.Soltu.DM.04G011570.1	0	0	3	15	0	13	44	83	69	0	0	0.06084	0.335838	0	0.300678	1.04687	1.96382	1.85099	0.00749482	5.18837	up	--	--	Molecular Function: hydrolase activity, hydrolyzing O-glycosyl compounds (GO:0004553);; Biological Process: carbohydrate metabolic process (GO:0005975);;	K19893|6.5e-55|soe:110783939|K19893 glucan endo-1,3-beta-glucosidase 5/6 [EC:3.2.1.39] | (RefSeq) glucan endo-1,3-beta-glucosidase 5-like	Starch and sucrose metabolism (ko00500)	--	--	Glycosyl hydrolases family 17	Glucan endo-1,3-beta-glucosidase, acidic isoform PR-Q' OS=Nicotiana tabacum OX=4097 PE=1 SV=1	--	--	PREDICTED: glucan endo-1,3-beta-glucosidase, acidic isoform PR-Q' isoform X1 [Solanum tuberosum]
gene.Soltu.DM.01G006570.1	42	37	41	113	94	168	108	85	107	0.900381	0.707771	0.807165	2.16219	2.03558	3.28658	2.14222	1.67897	2.38528	2.79818e-06	1.41897	up	--	--	Cellular Component: integral component of membrane (GO:0016021);;	K13466|1.9e-14|pavi:110767609|K13466 EIX receptor 1/2 | (RefSeq) LRR receptor-like serine/threonine-protein kinase FLS2	Plant-pathogen interaction (ko04626)	--	--	Leucine rich repeat	Receptor-like protein EIX2 OS=Solanum lycopersicum OX=4081 GN=EIX2 PE=1 SV=2	S	Function unknown	PREDICTED: LRR receptor-like serine/threonine-protein kinase FLS2 isoform X1 [Solanum tuberosum]
gene.Soltu.DM.01G007170.1	15	30	8	86	66	71	84	84	65	0.468993	0.817899	0.214752	2.41835	2.10888	2.03839	2.46291	2.45084	2.1358	4.49968e-08	2.05713	up	--	--	--	--	--	--	--	PAR1 protein	--	S	Function unknown	PREDICTED: uncharacterized protein LOC102603240 [Solanum tuberosum]
gene.Soltu.DM.03G012640.1	14	33	10	451	322	335	278	304	279	0.482689	1.02693	0.321078	14.1569	11.4682	10.745	9.09711	9.87174	10.2372	7.57562e-44	4.05511	up	--	--	Biological Process: response to acid chemical (GO:0001101);; Molecular Function: protein binding (GO:0005515);; Cellular Component: cellular_component (GO:0005575);; Cellular Component: intracellular (GO:0005622);; Cellular Component: cell (GO:0005623);; Cellular Component: cytoplasm (GO:0005737);; Cellular Component: vacuole (GO:0005773);; Cellular Component: vacuolar membrane (GO:0005774);; Cel…	--	--	--	--	PLAT/LH2 domain	PLAT domain-containing protein 2 OS=Arabidopsis thaliana OX=3702 GN=PLAT2 PE=2 SV=1	--	--	PREDICTED: uncharacterized protein LOC102600894 [Solanum tuberosum]
gene.Soltu.DM.11G007390.1	35	70	36	219	213	232	190	193	104	0.615458	1.09362	0.589485	3.45243	3.80886	3.73988	3.12475	3.1435	1.90808	6.9148e-11	1.96902	up	[R]	General function prediction only	Molecular Function: ADP binding (GO:0043531);;	K13453|4.4e-66|sly:101263413|K13453 disease resistance protein | (RefSeq) putative late blight resistance protein homolog R1A-4	Plant-pathogen interaction (ko04626)	[T]	Signal transduction mechanisms	NB-ARC domain	Putative late blight resistance protein homolog R1B-16 OS=Solanum demissum OX=50514 GN=R1B-16 PE=3 SV=1	S	Function unknown	putative late blight resistance protein homolog R1B-16 [Solanum pennellii]
gene.Soltu.DM.10G017970.1	202	213	177	864	788	904	655	725	530	5.30332	4.97252	4.33638	20.2408	20.913	21.6506	15.9719	17.5554	14.4801	1.80429e-37	1.84094	up	[G]	Carbohydrate transport and metabolism	Molecular Function: chitinase activity (GO:0004568);; Biological Process: carbohydrate metabolic process (GO:0005975);; Biological Process: chitin catabolic process (GO:0006032);; Molecular Function: chitin binding (GO:0008061);; Biological Process: cell wall macromolecule catabolic process (GO:0016998);;	K20547|2.1e-196|sot:102589770|K20547 basic endochitinase B [EC:3.2.1.14] | (RefSeq) endochitinase	Amino sugar and nucleotide sugar metabolism (ko00520);; MAPK signaling pathway - plant (ko04016)	[R]	General function prediction only	Chitinase class I	Basic 30 kDa endochitinase OS=Solanum lycopersicum OX=4081 GN=CHI9 PE=1 SV=1	G	Carbohydrate transport and metabolism	PREDICTED: endochitinase [Solanum tuberosum]
gene.Soltu.DM.06G025820.1	1012	1124	1115	389	449	444	608	511	545	31.3605	30.9272	32.1593	10.7093	14.0257	12.5044	17.4484	14.5694	17.5357	9.64115e-09	-1.19078	down	--	--	Cellular Component: photosystem I (GO:0009522);; Cellular Component: photosystem II (GO:0009523);; Cellular Component: chloroplast thylakoid membrane (GO:0009535);; Biological Process: photosynthesis, light harvesting (GO:0009765);; Cellular Component: integral component of membrane (GO:0016021);; Molecular Function: chlorophyll binding (GO:0016168);; Biological Process: protein-chromophore linka…	K08910|7.8e-143|sot:102583646|K08910 light-harvesting complex I chlorophyll a/b binding protein 4 | (RefSeq) chlorophyll a-b binding protein 4, chloroplastic-like	Photosynthesis - antenna proteins (ko00196)	--	--	Chlorophyll A-B binding protein	Chlorophyll a-b binding protein 4, chloroplastic OS=Arabidopsis thaliana OX=3702 GN=LHCA4 PE=1 SV=1	S	Function unknown	PREDICTED: chlorophyll a-b binding protein 4, chloroplastic-like [Solanum tuberosum]
gene.Soltu.DM.05G023720.1	827	774	961	4136	3145	3717	3103	3767	2825	5.89326	4.89585	6.37195	26.2194	22.6031	24.1083	20.4949	24.6978	20.9052	1.13778e-69	1.93615	up	[V]	Defense mechanisms	Molecular Function: ATP binding (GO:0005524);; Cellular Component: integral component of membrane (GO:0016021);; Molecular Function: ATPase activity (GO:0016887);;	K08712|1.4e-143|gsl:Gasu_29800|K08712 ATP-binding cassette, subfamily G (WHITE), member 2, SNQ2 | (RefSeq) ABC transporter, ATP-binding protein	ABC transporters (ko02010)	[Q]	Secondary metabolites biosynthesis, transport and catabolism	ABC-2 type transporter	Pleiotropic drug resistance protein 1 OS=Nicotiana tabacum OX=4097 GN=PDR1 PE=2 SV=1	V	Defense mechanisms	pleiotropic drug resistance protein 1-like [Solanum pennellii]
gene.Soltu.DM.01G031000.1	124	126	154	25	41	44	16	32	16	3.88784	3.51548	4.4994	0.680596	1.29572	1.2549	0.463021	0.920317	0.513384	3.24048e-09	-2.29452	down	--	--	Molecular Function: DNA binding (GO:0003677);; Molecular Function: transcription factor activity, sequence-specific DNA binding (GO:0003700);; Cellular Component: nucleus (GO:0005634);;	K09286|9.2e-103|sot:102597083|K09286 EREBP-like factor | (RefSeq) GAME9; APETALA2/ethylene response factor	--	--	--	AP2 domain	Ethylene-responsive transcription factor 1 OS=Nicotiana tabacum OX=4097 GN=ERF1 PE=2 SV=1	--	--	PREDICTED: ethylene-responsive transcription factor 1-like isoform X2 [Solanum tuberosum]
gene.Soltu.DM.03G011420.1	64	113	79	287	274	208	396	442	405	1.32425	2.08234	1.5285	5.31335	5.75001	3.94666	7.65943	8.48198	8.77495	1.36936e-08	1.94564	up	--	--	Cellular Component: integral component of membrane (GO:0016021);;	K15015|1.7e-07|mus:103992139|K15015 solute carrier family 32 (vesicular inhibitory amino acid transporter) | (RefSeq) vacuolar amino acid transporter 1	--	[E]	Amino acid transport and metabolism	Transmembrane amino acid transporter protein	GABA transporter 1 OS=Arabidopsis thaliana OX=3702 GN=GAT1 PE=1 SV=1	E	Amino acid transport and metabolism	PREDICTED: GABA transporter 1-like [Solanum tuberosum]
gene.Soltu.DM.11G022760.1	22	36	27	150	98	178	74	62	66	1.06813	1.54609	1.20093	6.56112	4.87472	7.95655	3.35701	2.78809	3.37863	7.28968e-05	1.80579	up	--	--	--	--	--	--	--	--	Kiwellin OS=Actinidia chinensis var. chinensis OX=1590841 GN=KWL1 PE=1 SV=2	S	Function unknown	PREDICTED: kiwellin-like [Solanum tuberosum]
gene.Soltu.DM.S002220.1	32	16	19	90	70	70	46	45	44	0.687671	0.292753	0.370385	1.71227	1.50892	1.36098	0.907729	0.870819	0.967951	0.0033666	1.3502	up	--	--	Biological Process: carbohydrate metabolic process (GO:0005975);; Molecular Function: glucan endo-1,3-beta-D-glucosidase activity (GO:0042973);;	K19891|1.3e-42|ini:109171869|K19891 glucan endo-1,3-beta-glucosidase 1/2/3 [EC:3.2.1.39] | (RefSeq) glucan endo-1,3-beta-glucosidase 3-like	Starch and sucrose metabolism (ko00500)	--	--	Glycosyl hydrolases family 17	Glucan endo-1,3-beta-glucosidase A OS=Solanum lycopersicum OX=4081 PE=1 SV=1	G	Carbohydrate transport and metabolism	PREDICTED: glucan endo-1,3-beta-glucosidase A-like [Solanum tuberosum]
gene.Soltu.DM.08G000790.2	46	34	64	0	0	0	0	0	0	1.2401	0.815965	1.60921	0	0	0	0	0	0	2.47012e-12	-8.1044	down	--	--	--	--	--	--	--	--	--	--	--	PREDICTED: alpha carbonic anhydrase 8-like [Solanum tuberosum]
gene.Soltu.DM.02G032650.1	22	0	12	54	56	41	175	223	135	0.33126	0	0.167617	0.742425	0.868316	0.565285	2.50476	3.1818	2.16963	0.00235901	3.23297	up	--	--	Molecular Function: peroxidase activity (GO:0004601);; Biological Process: response to oxidative stress (GO:0006979);; Molecular Function: heme binding (GO:0020037);;	K10529|0.0e+00|sot:102583448|K10529 alpha-dioxygenase [EC:1.14.99.-] | (RefSeq) alpha-dioxygenase 1-like	alpha-Linolenic acid metabolism (ko00592)	[R]	General function prediction only	Animal haem peroxidase	Alpha-dioxygenase 1 OS=Arabidopsis thaliana OX=3702 GN=DOX1 PE=1 SV=1	S	Function unknown	PREDICTED: alpha-dioxygenase 1-like [Solanum tuberosum]
gene.Soltu.DM.01G003440.1	102	170	145	284	204	196	482	502	471	1.13217	1.67263	1.49912	2.80925	2.28284	1.98114	4.96232	5.13695	5.44026	0.00554808	1.33221	up	--		Molecular Function: protein kinase activity (GO:0004672);; Molecular Function: ATP binding (GO:0005524);; Cellular Component: integral component of membrane (GO:0016021);;	K01180|4.5e-57|cmax:111487562|K01180 endo-1,3(4)-beta-glucanase [EC:3.2.1.6] | (RefSeq) uncharacterized protein LOC111487562	--	--	--	Protein kinase domain	Cysteine-rich receptor-like protein kinase 2 OS=Arabidopsis thaliana OX=3702 GN=CRK2 PE=1 SV=1	T	Signal transduction mechanisms	PREDICTED: cysteine-rich receptor-like protein kinase 2 isoform X2 [Solanum tuberosum]
gene.Soltu.DM.06G021920.1	36	48	40	205	171	216	125	127	111	0.421214	0.506073	0.438848	2.18164	2.06233	2.35302	1.38426	1.39752	1.37618	1.4107e-11	1.87149	up	[ET]	Amino acid transport and metabolism;; Signal transduction mechanisms	Molecular Function: ligand-gated ion channel activity (GO:0015276);; Cellular Component: integral component of membrane (GO:0016021);;	K05387|0.0e+00|cann:107855877|K05387 glutamate receptor, ionotropic, plant | (RefSeq) glutamate receptor 2.9-like	--	[PET]	Inorganic ion transport and metabolism;; Amino acid transport and metabolism;; Signal transduction mechanisms	Receptor family ligand binding region	Glutamate receptor 2.9 OS=Arabidopsis thaliana OX=3702 GN=GLR2.9 PE=2 SV=1	P	Inorganic ion transport and metabolism	PREDICTED: glutamate receptor 2.9-like [Capsicum annuum]
gene.Soltu.DM.02G010930.3	77	43	74	8	11	27	9	16	31	0.917523	0.456806	0.820047	0.079176	0.123886	0.291286	0.098781	0.165368	0.378055	0.00377752	-1.98792	down	[L]	Replication, recombination and repair	Molecular Function: nucleic acid binding (GO:0003676);; Molecular Function: helicase activity (GO:0004386);; Molecular Function: ATP binding (GO:0005524);;	K12858|0.0e+00|sot:102584823|K12858 ATP-dependent RNA helicase DDX23/PRP28 [EC:3.6.4.13] | (RefSeq) DEAD-box ATP-dependent RNA helicase 21-like	Spliceosome (ko03040)	[A]	RNA processing and modification	DEAD/DEAH box helicase	DEAD-box ATP-dependent RNA helicase 21 OS=Arabidopsis thaliana OX=3702 GN=RH21 PE=2 SV=1	A	RNA processing and modification	PREDICTED: DEAD-box ATP-dependent RNA helicase 21-like [Solanum tuberosum]
gene.Soltu.DM.04G032120.1	7	10	11	22	57	58	38	27	45	0.150578	0.180475	0.206283	0.414943	1.26903	1.16104	0.778267	0.541561	1.0273	0.000404334	2.09617	up	[E]	Amino acid transport and metabolism	Molecular Function: catalytic activity (GO:0003824);; Biological Process: biosynthetic process (GO:0009058);; Molecular Function: pyridoxal phosphate binding (GO:0030170);;	K01762|3.6e-274|sot:102606459|K01762 1-aminocyclopropane-1-carboxylate synthase [EC:4.4.1.14] | (RefSeq) 1-aminocyclopropane-1-carboxylate synthase 3	Cysteine and methionine metabolism (ko00270)	[T]	Signal transduction mechanisms	Aminotransferase class I and II	1-aminocyclopropane-1-carboxylate synthase 3 OS=Solanum lycopersicum OX=4081 GN=ACS3 PE=1 SV=1	E	Amino acid transport and metabolism	PREDICTED: 1-aminocyclopropane-1-carboxylate synthase 3 [Solanum tuberosum]
gene.Soltu.DM.04G033550.1	179	338	225	692	546	646	513	559	514	3.09434	5.20445	3.63418	10.6923	9.55386	10.2116	8.2511	8.93139	9.26559	1.68414e-12	1.17322	up	[I]	Lipid transport and metabolism	Biological Process: lipid metabolic process (GO:0006629);; Cellular Component: integral component of membrane (GO:0016021);;	K16818|1.6e-06|jre:109015008|K16818 phospholipase A1 [EC:3.1.1.32] | (RefSeq) phospholipase A(1) DAD1, chloroplastic-like	Glycerophospholipid metabolism (ko00564);; alpha-Linolenic acid metabolism (ko00592)	[I]	Lipid transport and metabolism	Lipase (class 3)	Triacylglycerol lipase OBL1 OS=Arabidopsis thaliana OX=3702 GN=OBL1 PE=1 SV=1	S	Function unknown	PREDICTED: uncharacterized protein LOC102593499 [Solanum tuberosum]
gene.Soltu.DM.S001720.1	11	5	14	49	43	23	68	117	80	0.279893	0.103681	0.330979	1.15502	1.13804	0.54279	1.68374	2.87059	2.22709	0.000270565	2.60142	up	[R]	General function prediction only	Biological Process: lipid catabolic process (GO:0016042);; Molecular Function: hydrolase activity (GO:0016787);;	--	--	[I]	Lipid transport and metabolism	Patatin-like phospholipase	Probable inactive patatin-3-Kuras 1 OS=Solanum tuberosum OX=4113 GN=pat3-k1 PE=1 SV=1	S	Function unknown	RecName: Full=Probable inactive patatin-3-Kuras 1; Flags: Precursor [Solanum tuberosum]
Solanum_tuberosum_newGene_6149	0	9	5	15	26	37	38	25	33	0	0.494371	0.31217	0.882266	1.91332	2.35874	2.59161	1.74777	2.37493	0.00124113	2.62374	up	--	--	--	--	--	--	--	--	--	--	--	PREDICTED: agamous-like MADS-box protein AGL80, partial [Solanum tuberosum]
gene.Soltu.DM.08G001200.1	263	410	315	923	743	912	540	763	511	4.45661	6.16126	4.97125	13.9277	12.7025	14.0694	8.48203	11.9076	9.0027	5.07011e-08	1.08425	up	--	--	Molecular Function: hydrolase activity (GO:0016787);; Biological Process: phosphatidylinositol dephosphorylation (GO:0046856);;	K24221|0.0e+00|sot:102598120|K24221 type I inositol polyphosphate 5-phosphatase IP5P1/2 [EC:3.1.3.56] | (RefSeq) type I inositol polyphosphate 5-phosphatase 2-like	Inositol phosphate metabolism (ko00562)	[U]	Intracellular trafficking, secretion, and vesicular transport	Endonuclease/Exonuclease/phosphatase family	Type I inositol polyphosphate 5-phosphatase 2 OS=Arabidopsis thaliana OX=3702 GN=IP5P2 PE=1 SV=2	T	Signal transduction mechanisms	PREDICTED: type I inositol polyphosphate 5-phosphatase 2-like [Solanum tuberosum]
gene.Soltu.DM.09G003930.1	0	0	0	208	182	190	41	31	31	0	0	0	4.14012	4.10442	3.86257	0.845594	0.637944	0.716179	2.84524e-09	9.16482	up	--	--	Molecular Function: hydrolase activity (GO:0016787);;	K10865|9.0e-100|sot:102587218|K10865 double-strand break repair protein MRE11 | (RefSeq) double-strand break repair protein MRE11	Homologous recombination (ko03440);; Non-homologous end-joining (ko03450)	[L]	Replication, recombination and repair	--	Double-strand break repair protein MRE11 OS=Arabidopsis thaliana OX=3702 GN=MRE11 PE=1 SV=1	L	Replication, recombination and repair	PREDICTED: double-strand break repair protein MRE11 isoform X1 [Solanum tuberosum]
gene.Soltu.DM.12G009450.1	19	26	28	127	96	191	59	43	49	0.42103	0.508462	0.560271	2.51465	2.15022	3.87311	1.19919	0.866164	1.13322	0.00191459	1.85898	up	[QV]	Secondary metabolites biosynthesis, transport and catabolism;; Defense mechanisms	Molecular Function: monooxygenase activity (GO:0004497);; Molecular Function: iron ion binding (GO:0005506);; Molecular Function: oxidoreductase activity, acting on paired donors, with incorporation or reduction of molecular oxygen (GO:0016705);; Molecular Function: heme binding (GO:0020037);;	K20562|2.4e-161|sind:105162333|K20562 biphenyl-4-hydroxylase | (RefSeq) cytochrome P450 CYP736A12-like	--	[Q]	Secondary metabolites biosynthesis, transport and catabolism	Cytochrome P450	Cytochrome P450 71AU50 OS=Prunus mume OX=102107 GN=CYP71AU50 PE=2 SV=1	Q	Secondary metabolites biosynthesis, transport and catabolism	PREDICTED: cytochrome P450 CYP736A12-like [Solanum tuberosum]
gene.Soltu.DM.07G021430.1	9	12	6	38	34	37	50	35	26	0.31982	0.379965	0.191744	1.27981	1.30277	1.27424	1.76343	1.24778	1.00877	2.15952e-05	1.96511	up	[QV]	Secondary metabolites biosynthesis, transport and catabolism;; Defense mechanisms	Molecular Function: monooxygenase activity (GO:0004497);; Molecular Function: iron ion binding (GO:0005506);; Cellular Component: integral component of membrane (GO:0016021);; Molecular Function: oxidoreductase activity, acting on paired donors, with incorporation or reduction of molecular oxygen (GO:0016705);; Molecular Function: heme binding (GO:0020037);;	K23809|6.6e-71|mtr:MTR_2g055470|K23809 cytochrome P450 family 72 subfamily A polypeptide 68 [EC:1.14.14.-] | (RefSeq) cytochrome P450 family 709 protein	--	[QI]	Secondary metabolites biosynthesis, transport and catabolism;; Lipid transport and metabolism	Cytochrome P450	Cytochrome P450 CYP72A219 OS=Panax ginseng OX=4054 PE=2 SV=1	Q	Secondary metabolites biosynthesis, transport and catabolism	cytochrome P450 CYP72A219-like [Solanum pennellii]
gene.Soltu.DM.08G024220.1	64	53	33	180	143	111	134	184	139	1.77678	1.30175	0.83785	4.44168	4.00953	2.79164	3.44431	4.69689	4.00258	1.00631e-06	1.50234	up	--	--	--	--	--	--	--	--	--	S	Function unknown	PREDICTED: RING-H2 finger protein ATL22-like [Solanum tuberosum]
gene.Soltu.DM.08G008440.1	18	8	45	68	72	92	125	161	89	0.507158	0.201763	1.22623	1.78189	2.11281	2.45967	3.39162	4.33963	2.69883	0.00138978	2.0152	up	--	--	--	--	--	--	--	--	--	S	Function unknown	PREDICTED: uncharacterized protein LOC102587686 [Solanum tuberosum]
gene.Soltu.DM.06G022820.1	724	935	838	335	269	417	425	454	401	10.6099	12.1682	11.4323	4.36583	3.97503	5.55922	5.76632	6.11726	6.0968	2.91511e-09	-1.17142	down	--	--	Molecular Function: protein dimerization activity (GO:0046983);;	K12126|4.0e-06|ath:AT1G09530|K12126 phytochrome-interacting factor 3 | (RefSeq) PIF3; phytochrome interacting factor 3	Plant hormone signal transduction (ko04075);; Circadian rhythm - plant (ko04712)	--	--	Helix-loop-helix DNA-binding domain	Transcription factor bHLH87 OS=Arabidopsis thaliana OX=3702 GN=BHLH87 PE=1 SV=1	S	Function unknown	PREDICTED: transcription factor bHLH87-like [Solanum tuberosum]
Solanum_tuberosum_newGene_958	69	42	39	0	6	8	13	20	7	1.85189	0.965358	1.03745	0	0.129629	0.174485	0.294817	0.470355	0.186972	0.00940172	-2.54395	down	--	--	Biological Process: telomere maintenance (GO:0000723);; Molecular Function: DNA helicase activity (GO:0003678);; Molecular Function: ATP binding (GO:0005524);; Biological Process: DNA repair (GO:0006281);; Biological Process: DNA recombination (GO:0006310);;	K15255|2.66e-87|nau:109207282|K15255 ATP-dependent DNA helicase PIF1 [EC:3.6.4.12] | (RefSeq) ATP-dependent DNA helicase PIF1-like	--	[D]	Cell cycle control, cell division, chromosome partitioning	PIF1-like helicase	--	D	Cell cycle control, cell division, chromosome partitioning	PREDICTED: ATP-dependent DNA helicase PIF1-like [Nicotiana attenuata]
gene.Soltu.DM.01G043980.1	271	375	321	642	571	668	1015	1066	865	13.2183	16.253	14.6062	27.9092	28.1571	29.7423	45.9791	47.9796	43.9109	4.3791e-06	1.27594	up	[Z]	Cytoskeleton	--	K10355|1.8e-87|sot:102593148|K10355 actin, other eukaryote | (RefSeq) AC100, Actin-100, PoAc100, actin; actin-101	--	[Z]	Cytoskeleton	Actin	Actin-100 (Fragment) OS=Solanum tuberosum OX=4113 GN=AC100 PE=3 SV=1	Z	Cytoskeleton	Actin-3 [Capsicum annuum]
gene.Soltu.DM.08G012890.1	60	42	53	2	0	0	2	7	0	2.04115	1.26421	1.66123	0.052985	0	0	0.042717	0.215183	0	9.89336e-06	-4.91678	down	--	--	--	K21866|3.3e-52|nta:107778701|K21866 ion channel POLLUX/CASTOR | (RefSeq) ion channel CASTOR-like	--	--	--	zinc-binding in reverse transcriptase	Putative ribonuclease H protein At1g65750 OS=Arabidopsis thaliana OX=3702 GN=At1g65750 PE=3 SV=1	S	Function unknown	PREDICTED: uncharacterized protein LOC107059096 [Solanum tuberosum]
gene.Soltu.DM.06G028910.1	25705	24544	27443	12981	11047	11925	14684	14187	12762	496.995	421.312	493.967	223.312	215.454	209.879	263.14	252.376	256.315	1.12871e-15	-1.06569	down	--	--	Molecular Function: cysteine-type endopeptidase inhibitor activity (GO:0004869);;	--	--	--	--	Cystatin domain	Multicystatin OS=Solanum tuberosum OX=4113 PE=1 SV=1	S	Function unknown	RecName: Full=Multicystatin; Short=MC [Solanum tuberosum]
gene.Soltu.DM.07G027740.5	1655	1662	1826	532	476	959	1001	959	972	38.2292	34.0686	39.2514	10.9202	11.0718	20.1514	21.4257	20.3822	23.3023	0.000636189	-1.12394	down	[G]	Carbohydrate transport and metabolism	Molecular Function: fructose-bisphosphate aldolase activity (GO:0004332);; Biological Process: glycolytic process (GO:0006096);;	K01623|9.0e-201|sot:102577529|K01623 fructose-bisphosphate aldolase, class I [EC:4.1.2.13] | (RefSeq) fructose-bisphosphate aldolase, cytoplasmic isozyme 1	Glycolysis / Gluconeogenesis (ko00010);; Pentose phosphate pathway (ko00030);; Fructose and mannose metabolism (ko00051);; Carbon fixation in photosynthetic organisms (ko00710);; Carbon metabolism (ko01200);; Biosynthesis of amino acids (ko01230)	[G]	Carbohydrate transport and metabolism	Fructose-bisphosphate aldolase class-I	Fructose-bisphosphate aldolase 5, cytosolic OS=Arabidopsis thaliana OX=3702 GN=FBA5 PE=1 SV=1	G	Carbohydrate transport and metabolism	PREDICTED: fructose-bisphosphate aldolase, cytoplasmic isozyme 1 [Solanum tuberosum]
gene.Soltu.DM.06G030470.1	138	216	121	499	411	526	201	292	245	4.85327	6.74117	3.96655	15.6419	14.6134	16.8579	6.55173	9.44373	8.9635	0.00264911	1.12428	up	[R]	General function prediction only	Biological Process: cytokinin biosynthetic process (GO:0009691);; Molecular Function: hydrolase activity (GO:0016787);;	K22522|4.0e-119|sot:102598045|K22522 cytokinin riboside 5'-monophosphate phosphoribohydrolase [EC:3.2.2.-] | (RefSeq) cytokinin riboside 5'-monophosphate phosphoribohydrolase LOG1-like	--	--	--	Possible lysine decarboxylase	Cytokinin riboside 5'-monophosphate phosphoribohydrolase LOG3 OS=Arabidopsis thaliana OX=3702 GN=LOG3 PE=1 SV=1	S	Function unknown	PREDICTED: cytokinin riboside 5'-monophosphate phosphoribohydrolase LOG1-like [Solanum tuberosum]
gene.Soltu.DM.05G024180.1	14	10	0	34	33	44	62	49	30	0.662366	0.449232	0	1.53052	1.68139	2.00584	2.88169	2.251	1.56063	0.00338171	2.32098	up	--	--	--	--	--	--	--	--	--	--	--	PREDICTED: uncharacterized protein LOC102597310 [Solanum tuberosum]
gene.Soltu.DM.10G017990.1	242	255	221	1166	970	1317	978	1034	877	6.23573	5.83553	5.29748	26.7611	25.2443	30.9285	23.3761	24.5351	23.5053	2.77486e-83	2.07222	up	[G]	Carbohydrate transport and metabolism	Molecular Function: chitinase activity (GO:0004568);; Biological Process: carbohydrate metabolic process (GO:0005975);; Biological Process: chitin catabolic process (GO:0006032);; Molecular Function: chitin binding (GO:0008061);; Biological Process: cell wall macromolecule catabolic process (GO:0016998);;	K20547|3.9e-195|sot:102589117|K20547 basic endochitinase B [EC:3.2.1.14] | (RefSeq) endochitinase-like	Amino sugar and nucleotide sugar metabolism (ko00520);; MAPK signaling pathway - plant (ko04016)	[R]	General function prediction only	Chitinase class I	Basic 30 kDa endochitinase OS=Solanum lycopersicum OX=4081 GN=CHI9 PE=1 SV=1	G	Carbohydrate transport and metabolism	PREDICTED: endochitinase-like [Solanum tuberosum]
gene.Soltu.DM.03G017710.1	220	388	149	512	478	382	1092	874	910	7.15985	11.216	4.51379	14.8099	15.6719	11.3089	32.9364	26.1808	30.7779	0.00278374	1.47619	up	--	--	--	--	--	--	--	PAR1 protein	--	S	Function unknown	PREDICTED: uncharacterized protein LOC102592141 [Solanum tuberosum]
gene.Soltu.DM.01G021670.1	179	203	147	604	443	534	483	455	385	5.87753	5.93108	4.50245	17.6768	14.7146	15.9835	14.7204	13.7611	13.1663	2.51224e-25	1.38747	up	--	--	--	--	--	--	--	--	Phylloplanin OS=Nicotiana tabacum OX=4097 PE=1 SV=1	S	Function unknown	PREDICTED: phylloplanin-like [Solanum tuberosum]
gene.Soltu.DM.02G014110.1	105	133	117	777	660	780	365	455	328	2.23392	2.52766	2.32372	14.8387	14.2835	15.2279	7.25866	8.97016	7.31066	1.31363e-13	2.1625	up	--	--	Molecular Function: purine nucleoside transmembrane transporter activity (GO:0015211);; Cellular Component: integral component of membrane (GO:0016021);;	K07893|2.8e-19|ini:109192111|K07893 Ras-related protein Rab-6A | (RefSeq) ras-related protein RABH1b-like	--	--	--	Purine nucleobase transmembrane transport	Probable purine permease 10 OS=Arabidopsis thaliana OX=3702 GN=PUP10 PE=2 SV=2	--	--	PREDICTED: probable purine permease 9 isoform X1 [Solanum tuberosum]
gene.Soltu.DM.08G000480.1	289	371	318	741	572	680	937	1143	1115	12.6568	14.4423	12.9657	28.9257	25.3164	27.165	38.0887	46.1356	50.7951	4.52967e-06	1.36712	up	--	--	Biological Process: lipid transport (GO:0006869);; Molecular Function: lipid binding (GO:0008289);;	--	--	--	--	Probable lipid transfer	--	S	Function unknown	PREDICTED: protein YLS3-like [Solanum tuberosum]
gene.Soltu.DM.09G019100.1	286	364	329	112	129	145	96	104	74	16.8695	19.0826	18.0557	5.87452	7.63169	7.75313	5.23992	5.63968	4.51989	2.61559e-18	-1.63632	down	--	--	--	--	--	--	--	--	--	--	--	uncharacterized protein LOC114074179 [Solanum pennellii]
gene.Soltu.DM.09G029760.1	71	108	63	15	13	11	47	34	28	1.28773	1.73411	1.06521	0.238965	0.235635	0.17224	0.781992	0.559656	0.529273	0.00887862	-1.736	down	--	--	Molecular Function: magnesium ion binding (GO:0000287);; Molecular Function: terpene synthase activity (GO:0010333);;	K15803|1.8e-183|nsy:104241247|K15803 (-)-germacrene D synthase [EC:4.2.3.75] | (RefSeq) germacrene C synthase-like	Sesquiterpenoid and triterpenoid biosynthesis (ko00909)	--	--	Terpene synthase family, metal binding domain	Germacrene C synthase OS=Solanum lycopersicum OX=4081 GN=SSTLE1 PE=1 SV=1	--	--	terpene synthase [Solanum lycopersicum]
gene.Soltu.DM.12G000840.1	12	2	4	47	31	44	33	38	32	0.173617	0.02419	0.054088	0.60614	0.444096	0.581919	0.434859	0.504438	0.478322	6.47389e-06	2.54859	up	--	--	Cellular Component: integral component of membrane (GO:0016021);;	K13466|9.8e-14|pmum:103343029|K13466 EIX receptor 1/2 | (RefSeq) probable LRR receptor-like serine/threonine-protein kinase At4g36180	Plant-pathogen interaction (ko04626)	[R]	General function prediction only	Leucine rich repeat	Receptor-like protein Cf-9 homolog OS=Solanum lycopersicum OX=4081 GN=HCR9-0 PE=2 SV=2	S	Function unknown	receptor-like protein Cf-9 [Solanum lycopersicum]
gene.Soltu.DM.09G024150.1	231	354	196	686	531	497	698	933	660	3.57231	4.85445	2.80936	9.4414	8.27982	6.98985	9.99963	13.2723	10.5999	9.71292e-07	1.31448	up	[G]	Carbohydrate transport and metabolism	Cellular Component: integral component of membrane (GO:0016021);; Molecular Function: transmembrane transporter activity (GO:0022857);;	K24193|3.4e-297|sot:102591841|K24193 MFS transporter, SP family, sugar:H+ symporter | (RefSeq) sugar transport protein 13	--	[R]	General function prediction only	Sugar (and other) transporter	Sugar transport protein 13 OS=Arabidopsis thaliana OX=3702 GN=STP13 PE=1 SV=2	G	Carbohydrate transport and metabolism	PREDICTED: sugar transport protein 13 [Solanum tuberosum]
gene.Soltu.DM.12G009350.1	9	17	18	46	43	31	45	90	98	0.20486	0.343358	0.39446	0.945937	1.00614	0.657105	0.967448	1.9408	2.40085	0.00206043	1.98334	up	[I]	Lipid transport and metabolism	Biological Process: lipid metabolic process (GO:0006629);; Cellular Component: integral component of membrane (GO:0016021);; Molecular Function: oxidoreductase activity, acting on paired donors, with oxidation of a pair of donors resulting in the reduction of molecular oxygen to two molecules of water (GO:0016717);;	K10256|1.4e-178|cann:107849596|K10256 omega-6 fatty acid desaturase / acyl-lipid omega-6 desaturase (Delta-12 desaturase) [EC:1.14.19.6 1.14.19.22] | (RefSeq) delta(12)-acyl-lipid-desaturase-like	Biosynthesis of unsaturated fatty acids (ko01040);; Fatty acid metabolism (ko01212)	--	--	Fatty acid desaturase	Delta(12)-acyl-lipid-desaturase OS=Punica granatum OX=22663 GN=FAD12 PE=2 SV=2	I	Lipid transport and metabolism	hypothetical protein EJD97_008083 [Solanum chilense]
gene.Soltu.DM.10G021940.1	60	36	74	409	391	354	411	539	518	1.58147	0.845783	1.8263	9.6451	10.4731	8.55006	10.1143	13.1487	14.2921	2.86561e-22	2.88105	up	[IQR]	Lipid transport and metabolism;; Secondary metabolites biosynthesis, transport and catabolism;; General function prediction only	--	K09841|1.1e-73|aof:109848475|K09841 xanthoxin dehydrogenase [EC:1.1.1.288] | (RefSeq) zerumbone synthase	Carotenoid biosynthesis (ko00906)	[R]	General function prediction only	Enoyl-(Acyl carrier protein) reductase	Secoisolariciresinol dehydrogenase (Fragment) OS=Podophyllum peltatum OX=35933 PE=1 SV=1	S	Function unknown	PREDICTED: secoisolariciresinol dehydrogenase-like [Solanum tuberosum]
gene.Soltu.DM.08G012570.1	28	59	28	103	93	92	77	119	45	0.451477	0.832477	0.41039	1.47681	1.49839	1.34326	1.14007	1.75598	0.749823	0.00689921	1.14333	up	--	--	Cellular Component: integral component of membrane (GO:0016021);;	K21435|2.6e-27|var:108322980|K21435 ankyrin repeat domain-containing protein 6 | (RefSeq) ankyrin repeat-containing protein At3g12360-like	--	[R]	General function prediction only	Ankyrin repeats (3 copies)	--	S	Function unknown	PREDICTED: ankyrin repeat-containing protein At3g12360-like [Solanum tuberosum]
gene.Soltu.DM.04G037270.1	30	84	93	1097	982	1047	3101	3717	2799	0.3534	0.881336	1.02941	11.6564	11.84	11.3875	34.348	40.8718	34.7453	8.49402e-14	4.92966	up	[E]	Amino acid transport and metabolism	Molecular Function: serine-type endopeptidase activity (GO:0004252);; Molecular Function: serine-type exopeptidase activity (GO:0070008);;	K01322|0.0e+00|sot:102587227|K01322 prolyl oligopeptidase [EC:3.4.21.26] | (RefSeq) prolyl endopeptidase	--	[O]	Posttranslational modification, protein turnover, chaperones	Prolyl oligopeptidase, N-terminal beta-propeller domain	--	E	Amino acid transport and metabolism	PREDICTED: prolyl endopeptidase isoform X1 [Solanum tuberosum]
gene.Soltu.DM.08G000990.2	50	170	62	446	146	308	450	229	288	1.04129	3.13666	1.19964	8.25989	3.06135	5.8411	8.68692	4.37387	6.23173	0.000864387	1.69804	up	--	--	Molecular Function: RNA binding (GO:0003723);;	K13199|9.1e-142|sot:102590612|K13199 plasminogen activator inhibitor 1 RNA-binding protein | (RefSeq) plasminogen activator inhibitor 1 RNA-binding protein-like	--	[R]	General function prediction only	Stm1	RGG repeats nuclear RNA binding protein A (Fragment) OS=Nicotiana tabacum OX=4097 GN=RggA PE=2 SV=1	S	Function unknown	PREDICTED: plasminogen activator inhibitor 1 RNA-binding protein-like [Solanum tuberosum]
gene.Soltu.DM.02G005390.1	775	495	342	1082	1047	1008	2318	1982	1906	24.7015	13.9901	10.1433	30.6653	33.644	29.242	68.4699	58.0981	63.1045	0.000879172	1.47854	up	[G]	Carbohydrate transport and metabolism	Molecular Function: chitinase activity (GO:0004568);; Biological Process: carbohydrate metabolic process (GO:0005975);; Biological Process: chitin catabolic process (GO:0006032);; Biological Process: cell wall macromolecule catabolic process (GO:0016998);;	K20547|9.4e-155|sot:102590998|K20547 basic endochitinase B [EC:3.2.1.14] | (RefSeq) SK2, chitinase; basic endochitinase	Amino sugar and nucleotide sugar metabolism (ko00520);; MAPK signaling pathway - plant (ko04016)	[R]	General function prediction only	Chitinase class I	Basic endochitinase (Fragment) OS=Solanum lycopersicum OX=4081 GN=CHI14 PE=2 SV=1	G	Carbohydrate transport and metabolism	basic endochitinase precursor [Solanum tuberosum]
gene.Soltu.DM.02G032640.1	181	68	54	1482	1153	1175	4606	5241	4546	2.61011	0.86631	0.71757	19.0054	16.7616	15.4154	61.5647	69.5452	68.0968	5.04896e-10	4.84725	up	--	--	Molecular Function: peroxidase activity (GO:0004601);; Biological Process: response to oxidative stress (GO:0006979);; Molecular Function: heme binding (GO:0020037);;	K10529|0.0e+00|sot:102583777|K10529 alpha-dioxygenase [EC:1.14.99.-] | (RefSeq) alpha-dioxygenase 1-like	alpha-Linolenic acid metabolism (ko00592)	[R]	General function prediction only	Animal haem peroxidase	Alpha-dioxygenase 1 OS=Arabidopsis thaliana OX=3702 GN=DOX1 PE=1 SV=1	S	Function unknown	PREDICTED: alpha-dioxygenase 1-like [Solanum tuberosum]
gene.Soltu.DM.10G017910.2	5507	5038	4676	9425	7477	9339	15249	14293	13173	141.039	114.549	111.473	214.775	193.182	217.726	361.981	336.824	350.473	7.23993e-05	1.12566	up	[G]	Carbohydrate transport and metabolism	Molecular Function: chitinase activity (GO:0004568);; Biological Process: carbohydrate metabolic process (GO:0005975);; Biological Process: chitin catabolic process (GO:0006032);; Molecular Function: chitin binding (GO:0008061);; Biological Process: cell wall macromolecule catabolic process (GO:0016998);;	K20547|4.9e-185|cann:107878318|K20547 basic endochitinase B [EC:3.2.1.14] | (RefSeq) endochitinase 4	Amino sugar and nucleotide sugar metabolism (ko00520);; MAPK signaling pathway - plant (ko04016)	[R]	General function prediction only	Chitinase class I	Endochitinase A OS=Nicotiana tabacum OX=4097 GN=CHN48 PE=1 SV=2	G	Carbohydrate transport and metabolism	Basic 30 kDa endochitinase [Capsicum chinense]
gene.Soltu.DM.03G027860.1	27	18	19	117	81	84	37	153	57	0.528558	0.309903	0.343504	2.10709	1.65684	1.55225	0.691648	2.85269	1.19874	0.000267069	1.95105	up	--	--	Molecular Function: calmodulin binding (GO:0005516);;	--	--	--	--	Calmodulin binding protein-like	--	--	--	PREDICTED: calmodulin-binding protein 60 A-like isoform X1 [Solanum tuberosum]
gene.Soltu.DM.05G007790.1	136	204	152	113	92	66	80	86	57	1.84024	2.45385	1.91655	1.35858	1.2592	0.813166	0.995878	1.07466	0.794151	2.95052e-05	-1.05526	down	[E]	Amino acid transport and metabolism	Cellular Component: integral component of membrane (GO:0016021);; Molecular Function: transmembrane transporter activity (GO:0022857);;	K14638|2.2e-310|sly:107196795|K14638 solute carrier family 15 (peptide/histidine transporter), member 3/4 | (RefSeq) NRT1/ PTR FAMILY 1.2	--	[E]	Amino acid transport and metabolism	POT family	Protein NRT1/ PTR FAMILY 1.2 OS=Arabidopsis thaliana OX=3702 GN=NPF1.2 PE=1 SV=1	E	Amino acid transport and metabolism	PREDICTED: protein NRT1/ PTR FAMILY 1.2-like isoform X2 [Solanum tuberosum]
gene.Soltu.DM.01G005170.1	12	7	6	38	42	39	70	75	91	0.319682	0.171591	0.145655	0.942598	1.17115	0.992492	1.80502	1.91918	2.64612	4.39128e-06	2.78404	up	--	--	Molecular Function: hydrolase activity, hydrolyzing O-glycosyl compounds (GO:0004553);; Biological Process: carbohydrate metabolic process (GO:0005975);;	K19891|2.4e-53|ath:AT2G01630|K19891 glucan endo-1,3-beta-glucosidase 1/2/3 [EC:3.2.1.39] | (RefSeq) O-Glycosyl hydrolases family 17 protein	Starch and sucrose metabolism (ko00500)	--	--	Glycosyl hydrolases family 17	Glucan endo-1,3-beta-glucosidase A OS=Solanum lycopersicum OX=4081 PE=1 SV=1	G	Carbohydrate transport and metabolism	PREDICTED: glucan endo-1,3-beta-glucosidase A [Solanum tuberosum]
Solanum_tuberosum_newGene_3229	16	23	22	96	82	96	72	70	67	0.154386	0.224634	0.132577	0.591449	0.603619	0.578487	0.442138	0.479603	0.654997	7.89698e-12	1.91929	up	--	--	Molecular Function: nucleic acid binding (GO:0003676);; Molecular Function: RNA-DNA hybrid ribonuclease activity (GO:0004523);;	--	--	--	--	Reverse transcriptase-like	--	S	Function unknown	PREDICTED: uncharacterized protein LOC107063442 [Solanum tuberosum]
gene.Soltu.DM.03G011430.1	82	84	105	522	418	500	676	722	659	1.5236	1.39575	1.82996	8.6998	7.90357	8.53126	11.7437	12.4476	12.839	1.36511e-25	2.63461	up	--	--	Molecular Function: UDP-glycosyltransferase activity (GO:0008194);;	K13080|9.0e-113|vvi:100244875|K13080 flavanone 7-O-glucoside 2''-O-beta-L-rhamnosyltransferase [EC:2.4.1.236] | (RefSeq) flavanone 7-O-glucoside 2''-O-beta-L-rhamnosyltransferase	Flavonoid biosynthesis (ko00941);; Flavone and flavonol biosynthesis (ko00944)	[GC]	Carbohydrate transport and metabolism;; Energy production and conversion	UDP-glucoronosyl and UDP-glucosyl transferase	Beta-D-glucosyl crocetin beta-1,6-glucosyltransferase OS=Gardenia jasminoides OX=114476 GN=UGT94E5 PE=1 SV=1	S	Function unknown	PREDICTED: beta-D-glucosyl crocetin beta-1,6-glucosyltransferase-like [Solanum tuberosum]
gene.Soltu.DM.02G005400.1	281	305	238	165	158	156	149	109	110	9.73373	9.38735	7.66913	5.07297	5.49956	4.91751	4.78315	3.45281	3.92915	3.76439e-08	-1.02732	down	--	--	Molecular Function: DNA binding (GO:0003677);; Cellular Component: nucleus (GO:0005634);; Biological Process: regulation of transcription, DNA-templated (GO:0006355);;	K00521|1.2e-47|cmos:111447866|K00521 ferric-chelate reductase [EC:1.16.1.7] | (RefSeq) ferric reduction oxidase 7, chloroplastic-like	--	--	--	No apical meristem (NAM) protein	NAC domain-containing protein 6 OS=Glycine max OX=3847 GN=NAC6 PE=2 SV=1	--	--	PREDICTED: NAC transcription factor 25-like isoform X2 [Solanum tuberosum]
gene.Soltu.DM.11G002250.1	292	331	215	635	423	625	956	979	825	6.27601	6.3101	4.29019	12.1488	9.16574	12.2221	19.0519	19.3744	18.4295	3.60092e-05	1.35796	up	[G]	Carbohydrate transport and metabolism	Molecular Function: zinc ion binding (GO:0008270);; Molecular Function: oxidoreductase activity (GO:0016491);;	K23232|4.2e-206|sly:543602|K23232 8-hydroxygeraniol dehydrogenase [EC:1.1.1.324] | (RefSeq) 8-hydroxygeraniol dehydrogenase	Monoterpenoid biosynthesis (ko00902)	[Q]	Secondary metabolites biosynthesis, transport and catabolism	Alcohol dehydrogenase GroES-like domain	8-hydroxygeraniol dehydrogenase OS=Catharanthus roseus OX=4058 GN=10HGO PE=1 SV=1	C	Energy production and conversion	8-hydroxygeraniol dehydrogenase [Solanum lycopersicum]
gene.Soltu.DM.12G029500.1	186	227	240	764	704	642	810	909	791	3.82438	4.15797	4.60457	14.0286	14.6586	12.0663	15.4917	17.2597	16.9501	3.3222e-25	1.76874	up	[HC]	Coenzyme transport and metabolism;; Energy production and conversion	Molecular Function: FAD binding (GO:0071949);;	K09838|5.9e-15|ccaj:109817363|K09838 zeaxanthin epoxidase [EC:1.14.15.21] | (RefSeq) zeaxanthin epoxidase, chloroplastic-like	Carotenoid biosynthesis (ko00906)	[CR]	Energy production and conversion;; General function prediction only	FAD binding domain	Monooxygenase 2 OS=Arabidopsis thaliana OX=3702 GN=MO2 PE=2 SV=1	CH	Energy production and conversion;; Coenzyme transport and metabolism	PREDICTED: FAD-dependent urate hydroxylase-like isoform X3 [Solanum tuberosum]
Solanum_tuberosum_newGene_2930	3	5	0	171	149	176	37	79	53	0.039912	0.063134	0	2.21893	2.18256	2.33352	0.492768	1.05366	0.801009	1.59841e-10	5.29627	up	--	--	Molecular Function: UDP-glycosyltransferase activity (GO:0008194);;	K13691|3.17e-35|sot:102599086|K13691 pathogen-inducible salicylic acid glucosyltransferase [EC:2.4.1.-] | (RefSeq) UDP-glycosyltransferase 74F1-like	--	[GC]	Carbohydrate transport and metabolism;; Energy production and conversion	--	UDP-glycosyltransferase 74E2 OS=Arabidopsis thaliana OX=3702 GN=UGT74E2 PE=1 SV=1	--	--	PREDICTED: UDP-glycosyltransferase 74F1-like [Solanum tuberosum]
gene.Soltu.DM.08G025290.1	58	62	112	173	167	214	157	147	149	1.21894	1.14824	2.18466	3.24819	3.54118	4.11554	3.06348	2.84673	3.2596	0.000345303	1.04639	up	--	--	--	--	--	--	--	--	--	S	Function unknown	PREDICTED: uncharacterized protein LOC102579011 [Solanum tuberosum]
gene.Soltu.DM.08G017240.1	241	308	201	158	141	96	51	89	75	23.0129	26.0749	17.8624	13.3682	13.5948	8.33571	4.4876	7.74446	7.37597	0.000387865	-1.36677	down	--	--	--	--	--	--	--	--	BURP domain-containing protein 17 OS=Oryza sativa subsp. japonica OX=39947 GN=BURP17 PE=2 SV=1	--	--	PREDICTED: uncharacterized protein LOC102588389 isoform X2 [Solanum tuberosum]
gene.Soltu.DM.09G025120.3	516	459	365	298	50	63	174	63	82	9.64886	7.62519	6.34659	4.96011	0.926591	1.06573	3.01173	1.0785	1.57892	0.00188646	-1.97586	down	[R]	General function prediction only	--	K01456|1.6e-122|pper:18774423|K01456 peptide-N4-(N-acetyl-beta-glucosaminyl)asparagine amidase [EC:3.5.1.52] | (RefSeq) peptide-N(4)-(N-acetyl-beta- glucosaminyl)asparagine amidase isoform X1	Protein processing in endoplasmic reticulum (ko04141)	[C]	Energy production and conversion	Aldo/keto reductase family	Probable aldo-keto reductase 1 OS=Glycine max OX=3847 GN=AKR1 PE=2 SV=1	C	Energy production and conversion	PREDICTED: perakine reductase-like [Solanum tuberosum]
gene.Soltu.DM.11G010380.1	1173	1328	1128	235	193	232	677	568	639	11.6758	11.7316	10.4489	2.0802	1.931	2.09707	6.24376	5.20175	6.60287	0.00539316	-1.5374	down	[C]	Energy production and conversion	Biological Process: nitric oxide biosynthetic process (GO:0006809);; Molecular Function: heme binding (GO:0020037);; Molecular Function: molybdenum ion binding (GO:0030151);; Biological Process: nitrate assimilation (GO:0042128);; Molecular Function: molybdopterin cofactor binding (GO:0043546);; Molecular Function: nitrate reductase (NADPH) activity (GO:0050464);;	K10534|0.0e+00|sot:102577728|K10534 nitrate reductase (NAD(P)H) [EC:1.7.1.1 1.7.1.2 1.7.1.3] | (RefSeq) NR3, StNR2, StNR5, StNR6; NADH nitrate reductase	Nitrogen metabolism (ko00910)	[C]	Energy production and conversion	Oxidoreductase molybdopterin binding domain	Nitrate reductase [NADH] OS=Solanum lycopersicum OX=4081 GN=NIA PE=3 SV=1	CI	Energy production and conversion;; Lipid transport and metabolism	NADH nitrate reductase [Solanum tuberosum]
gene.Soltu.DM.09G004180.1	16	25	26	54	42	71	48	70	51	0.212598	0.289697	0.316399	0.636955	0.556415	0.863252	0.585345	0.853	0.702885	0.000443907	1.26332	up	--	--	Cellular Component: endosome (GO:0005768);; Cellular Component: trans-Golgi network (GO:0005802);; Cellular Component: plasma membrane (GO:0005886);; Cellular Component: integral component of membrane (GO:0016021);; Biological Process: recognition of pollen (GO:0048544);;	K13420|5.4e-18|mesc:110601988|K13420 LRR receptor-like serine/threonine-protein kinase FLS2 [EC:2.7.11.1] | (RefSeq) LRR receptor-like serine/threonine-protein kinase FLS2	MAPK signaling pathway - plant (ko04016);; Plant-pathogen interaction (ko04626)	--	--	D-mannose binding lectin	PAN domain-containing protein At5g03700 OS=Arabidopsis thaliana OX=3702 GN=At5g03700 PE=1 SV=1	S	Function unknown	PREDICTED: PAN domain-containing protein At5g03700 [Solanum tuberosum]
gene.Soltu.DM.05G009500.1	10	10	17	283	289	257	133	219	138	0.176445	0.156914	0.293467	4.71267	5.45573	4.37955	2.30346	3.77009	2.67153	3.49118e-25	4.07389	up	[P]	Inorganic ion transport and metabolism	Cellular Component: plasma membrane (GO:0005886);; Biological Process: nitrate transport (GO:0015706);; Cellular Component: integral component of membrane (GO:0016021);; Molecular Function: transmembrane transporter activity (GO:0022857);;	K02575|3.7e-285|sot:102586376|K02575 MFS transporter, NNP family, nitrate/nitrite transporter | (RefSeq) high affinity nitrate transporter 2.5	Nitrogen metabolism (ko00910)	--	--	Major Facilitator Superfamily	High affinity nitrate transporter 2.5 OS=Arabidopsis thaliana OX=3702 GN=NRT2.5 PE=1 SV=1	P	Inorganic ion transport and metabolism	PREDICTED: high affinity nitrate transporter 2.5 [Solanum tuberosum]
Solanum_tuberosum_newGene_2420	11	6	12	28	31	19	43	33	32	0.256235	0.131835	0.261272	0.615978	0.758138	0.426231	0.96571	0.748581	0.820631	0.00524915	1.61832	up	--	--	--	--	--	--	--	--	--	--	--	hypothetical protein FXO38_30614 [Capsicum annuum]
gene.Soltu.DM.05G000380.1	300	327	300	103	83	94	124	143	181	5.70721	5.52143	5.31461	1.73484	1.58557	1.62118	2.18313	2.50622	3.5719	5.38444e-05	-1.38861	down	--	--	Molecular Function: UDP-glycosyltransferase activity (GO:0008194);;	K13495|5.7e-261|sot:107060850|K13495 cis-zeatin O-glucosyltransferase [EC:2.4.1.215] | (RefSeq) zeatin O-glucosyltransferase-like	Zeatin biosynthesis (ko00908)	[GC]	Carbohydrate transport and metabolism;; Energy production and conversion	UDP-glucoronosyl and UDP-glucosyl transferase	Zeatin O-glucosyltransferase OS=Phaseolus lunatus OX=3884 GN=ZOG1 PE=2 SV=1	S	Function unknown	PREDICTED: zeatin O-glucosyltransferase-like [Solanum tuberosum]
gene.Soltu.DM.03G006240.1	102	135	83	221	181	175	399	439	561	5.47061	6.45858	4.1414	10.5728	9.81399	8.57803	19.9227	21.7471	31.38	0.00313901	1.61208	up	--	--	Molecular Function: calcium ion binding (GO:0005509);;	K13448|2.0e-101|sot:102601367|K13448 calcium-binding protein CML | (RefSeq) probable calcium-binding protein CML41	Plant-pathogen interaction (ko04626)	[T]	Signal transduction mechanisms	EF-hand domain pair	Probable calcium-binding protein CML41 OS=Arabidopsis thaliana OX=3702 GN=CML41 PE=2 SV=2	DTZ	Cell cycle control, cell division, chromosome partitioning;; Signal transduction mechanisms;; Cytoskeleton	PREDICTED: probable calcium-binding protein CML41 [Solanum tuberosum]
gene.Soltu.DM.05G016010.1	598	761	635	274	291	376	338	305	275	14.8599	16.7869	14.6823	6.05741	7.28009	8.49068	7.78095	6.95585	7.08962	1.09019e-18	-1.15954	down	[L]	Replication, recombination and repair	Molecular Function: nucleic acid binding (GO:0003676);; Molecular Function: helicase activity (GO:0004386);; Molecular Function: ATP binding (GO:0005524);;	K03257|7.0e-237|sot:102595924|K03257 translation initiation factor 4A | (RefSeq) eukaryotic initiation factor 4A-15	RNA transport (ko03013)	[J]	Translation, ribosomal structure and biogenesis	DEAD/DEAH box helicase	Eukaryotic initiation factor 4A-15 OS=Nicotiana tabacum OX=4097 PE=2 SV=1	L	Replication, recombination and repair	PREDICTED: eukaryotic initiation factor 4A-15 [Solanum tuberosum]
gene.Soltu.DM.01G040660.2	256	247	215	108	105	108	22	44	91	4.4674	3.8203	3.4868	1.67188	1.84413	1.70847	0.353829	0.697105	1.64633	0.00274172	-1.6562	down	--	--	Cellular Component: integral component of membrane (GO:0016021);; Molecular Function: transmembrane transporter activity (GO:0022857);;	K17500|2.2e-28|nta:107765414|K17500 integrin-linked kinase-associated serine/threonine phosphatase 2C [EC:3.1.3.16] | (RefSeq) WAT1-related protein At3g18200-like	--	--	--	EamA-like transporter family	WAT1-related protein At1g09380 OS=Arabidopsis thaliana OX=3702 GN=At1g09380 PE=2 SV=1	--	--	PREDICTED: WAT1-related protein At1g09380-like [Solanum tuberosum]
Solanum_tuberosum_newGene_3505	13	16	6	1545	1436	1482	270	214	191	0.394255	0.689594	0.136557	53.5311	56.1749	53.3129	9.75417	8.63111	7.20264	2.20533e-11	6.09696	up	--	--	--	K10865|7.35e-11|sot:107059491|K10865 double-strand break repair protein MRE11 | (RefSeq) uncharacterized LOC107059491	Homologous recombination (ko03440);; Non-homologous end-joining (ko03450)	--	--	--	--	--	--	hypothetical protein EJD97_021778, partial [Solanum chilense]
gene.Soltu.DM.02G012460.2	11436	12991	12406	10150	5720	6578	5083	4631	4375	340.428	343.335	343.804	268.829	171.771	178.245	140.225	126.834	135.267	8.29786e-07	-1.09517	down	--	--	Cellular Component: chloroplast thylakoid membrane (GO:0009535);; Cellular Component: photosystem I reaction center (GO:0009538);; Cellular Component: chloroplast envelope (GO:0009941);; Cellular Component: plastoglobule (GO:0010287);; Biological Process: photosynthesis (GO:0015979);; Cellular Component: integral component of membrane (GO:0016021);; Molecular Function: protein domain specific bin…	K02694|6.7e-125|sot:102585281|K02694 photosystem I subunit III | (RefSeq) photosystem I reaction center subunit III, chloroplastic-like	Photosynthesis (ko00195)	--	--	Photosystem I reaction centre subunit III	Photosystem I reaction center subunit III, chloroplastic OS=Flaveria trinervia OX=4227 GN=PSAF PE=2 SV=1	S	Function unknown	PREDICTED: photosystem I reaction center subunit III, chloroplastic-like [Solanum tuberosum]
gene.Soltu.DM.01G044850.1	48	53	35	118	86	114	93	104	67	1.10056	1.06374	0.745105	2.39272	1.96663	2.36775	1.96918	2.18595	1.58961	6.24868e-05	1.02481	up	--	--	Molecular Function: molecular_function (GO:0003674);; Molecular Function: catalytic activity (GO:0003824);; Molecular Function: ubiquitin-protein transferase activity (GO:0004842);; Biological Process: cellular protein modification process (GO:0006464);; Biological Process: proteolysis (GO:0006508);; Biological Process: ubiquitin-dependent protein catabolic process (GO:0006511);; Biological Proce…	K19041|4.0e-34|spen:107032435|K19041 E3 ubiquitin-protein ligase RNF38/44 [EC:2.3.2.27] | (RefSeq) RING-H2 finger protein ATL54-like	--	[O]	Posttranslational modification, protein turnover, chaperones	Ring finger domain	RING-H2 finger protein ATL54 OS=Arabidopsis thaliana OX=3702 GN=ATL54 PE=2 SV=2	O	Posttranslational modification, protein turnover, chaperones	PREDICTED: RING-H2 finger protein ATL54-like [Solanum tuberosum]
gene.Soltu.DM.07G001780.1	16665	19222	17294	10331	9289	10563	8132	7900	6943	563.017	576.529	543.899	310.526	316.549	324.827	254.614	245.55	243.646	1.26293e-29	-1.07068	down	--	--	Molecular Function: RNA binding (GO:0003723);; Molecular Function: ribonuclease T2 activity (GO:0033897);;	K01166|1.1e-147|sot:102584808|K01166 ribonuclease T2 [EC:4.6.1.19] | (RefSeq) intracellular ribonuclease LX-like	--	--	--	Ribonuclease T2 family	--	S	Function unknown	PREDICTED: intracellular ribonuclease LX-like [Solanum tuberosum]
gene.Soltu.DM.11G005100.1	6192	6823	6318	2609	2269	2592	3913	3574	3278	100.805	98.6217	95.7647	37.7957	37.2526	38.4093	59.0503	53.5319	55.4357	1.99129e-07	-1.1354	down	[T]	Signal transduction mechanisms	Molecular Function: magnesium ion binding (GO:0000287);; Molecular Function: pyruvate kinase activity (GO:0004743);; Molecular Function: kinase activity (GO:0016301);; Molecular Function: potassium ion binding (GO:0030955);;	K00873|2.3e-298|sot:102582462|K00873 pyruvate kinase [EC:2.7.1.40] | (RefSeq) pyruvate kinase 1, cytosolic-like	Glycolysis / Gluconeogenesis (ko00010);; Purine metabolism (ko00230);; Pyruvate metabolism (ko00620);; Carbon metabolism (ko01200);; Biosynthesis of amino acids (ko01230)	[G]	Carbohydrate transport and metabolism	Pyruvate kinase, barrel domain	Pyruvate kinase 2, cytosolic OS=Oryza sativa subsp. indica OX=39946 GN=OsI_37456 PE=3 SV=1	G	Carbohydrate transport and metabolism	PREDICTED: pyruvate kinase 1, cytosolic-like [Solanum tuberosum]
gene.Soltu.DM.12G012260.1	46	12	12	429	326	344	213	274	258	0.414176	0.095226	0.101339	3.47099	2.9913	2.85141	1.78963	2.2881	2.43302	9.77461e-16	3.60786	up	--	--	Molecular Function: microtubule motor activity (GO:0003777);; Molecular Function: ATP binding (GO:0005524);; Biological Process: microtubule-based movement (GO:0007018);; Molecular Function: microtubule binding (GO:0008017);;	K10406|0.0e+00|sot:102600707|K10406 kinesin family member C2/C3 | (RefSeq) kinesin-4-like	--	[Z]	Cytoskeleton	Kinesin motor domain	Kinesin-like protein KIN-14C OS=Oryza sativa subsp. japonica OX=39947 GN=KIN14C PE=2 SV=1	Z	Cytoskeleton	PREDICTED: kinesin-4-like isoform X1 [Solanum tuberosum]
gene.Soltu.DM.02G032680.1	49	41	48	308	267	327	1327	1916	1451	0.713134	0.525322	0.649212	3.98689	3.91985	4.32797	17.898	25.6539	21.9336	4.57713e-07	4.30991	up	[Q]	Secondary metabolites biosynthesis, transport and catabolism	Molecular Function: peroxidase activity (GO:0004601);; Biological Process: response to oxidative stress (GO:0006979);; Molecular Function: heme binding (GO:0020037);;	K10529|0.0e+00|sot:102584442|K10529 alpha-dioxygenase [EC:1.14.99.-] | (RefSeq) alpha-dioxygenase 1-like	alpha-Linolenic acid metabolism (ko00592)	[R]	General function prediction only	Animal haem peroxidase	Alpha-dioxygenase 1 OS=Arabidopsis thaliana OX=3702 GN=DOX1 PE=1 SV=1	S	Function unknown	PREDICTED: alpha-dioxygenase 1-like [Solanum tuberosum]
gene.Soltu.DM.10G019020.1	27	71	53	766	652	695	2501	2880	2975	0.633894	1.46455	1.15264	16.0097	15.4518	14.8539	54.4882	62.3067	72.6628	7.21423e-12	5.12326	up	--	--	Molecular Function: peroxidase activity (GO:0004601);; Biological Process: response to oxidative stress (GO:0006979);; Molecular Function: heme binding (GO:0020037);; Biological Process: hydrogen peroxide catabolic process (GO:0042744);; Molecular Function: metal ion binding (GO:0046872);;	K00430|2.0e-180|sot:102592776|K00430 peroxidase [EC:1.11.1.7] | (RefSeq) cationic peroxidase 1-like	Phenylpropanoid biosynthesis (ko00940)	--	--	Peroxidase	Cationic peroxidase 1 OS=Arachis hypogaea OX=3818 GN=PNC1 PE=1 SV=2	S	Function unknown	PREDICTED: cationic peroxidase 1-like [Solanum tuberosum]
gene.Soltu.DM.06G013150.1	1177	1263	1278	2718	2022	2528	4478	5379	4346	17.1655	16.3497	17.3545	35.2746	29.7514	33.5689	60.5452	72.1975	65.8587	2.45029e-05	1.48329	up	[IQ]	Lipid transport and metabolism;; Secondary metabolites biosynthesis, transport and catabolism	Molecular Function: catalytic activity (GO:0003824);;	K22133|4.0e-298|sot:102596399|K22133 oxalate---CoA ligase [EC:6.2.1.8] | (RefSeq) oxalate--CoA ligase	Glyoxylate and dicarboxylate metabolism (ko00630)	[I]	Lipid transport and metabolism	AMP-binding enzyme	Oxalate--CoA ligase OS=Arabidopsis thaliana OX=3702 GN=AAE3 PE=1 SV=1	IQ	Lipid transport and metabolism;; Secondary metabolites biosynthesis, transport and catabolism	PREDICTED: oxalate--CoA ligase [Solanum tuberosum]
gene.Soltu.DM.09G026500.1	12	10	13	60	46	41	100	91	67	0.359888	0.272349	0.37844	1.67412	1.44076	1.14264	2.88473	2.60228	2.15355	7.956e-07	2.47418	up	--	--	Molecular Function: DNA binding (GO:0003677);; Molecular Function: transcription factor activity, sequence-specific DNA binding (GO:0003700);; Cellular Component: nucleus (GO:0005634);;	K13433|7.7e-23|mdm:103412429|K13433 pathogenesis-related genes transcriptional activator PTI5 | (RefSeq) pathogenesis-related genes transcriptional activator PTI5-like	Plant-pathogen interaction (ko04626)	--	--	AP2 domain	Ethylene-responsive transcription factor ERF095 OS=Arabidopsis thaliana OX=3702 GN=ERF095 PE=1 SV=1	K	Transcription	PREDICTED: ethylene-responsive transcription factor ERF096-like [Solanum tuberosum]
gene.Soltu.DM.06G004450.1	702	870	663	1073	1091	1045	2369	2489	2248	18.154	19.982	15.9696	24.6907	28.4712	24.6104	56.829	59.2681	60.4376	0.0076821	1.17598	up	--	--	Molecular Function: DNA binding (GO:0003677);;	K09422|4.8e-91|sot:102606303|K09422 transcription factor MYB, plant | (RefSeq) transcription factor MYB48-like	--	[K]	Transcription	Myb-like DNA-binding domain	Transcription factor MYB48 OS=Arabidopsis thaliana OX=3702 GN=MYB48 PE=2 SV=1	K	Transcription	PREDICTED: transcription factor MYB48-like [Solanum tuberosum]
gene.Soltu.DM.08G002180.1	82	119	107	56	20	41	34	34	26	1.69653	2.18612	2.0669	1.02228	0.401887	0.758502	0.647309	0.650049	0.549415	8.31249e-07	-1.6189	down	[G]	Carbohydrate transport and metabolism	Molecular Function: UDP-glycosyltransferase activity (GO:0008194);;	K13691|3.4e-245|spen:107028476|K13691 pathogen-inducible salicylic acid glucosyltransferase [EC:2.4.1.-] | (RefSeq) UDP-glycosyltransferase 74G1-like	--	[GC]	Carbohydrate transport and metabolism;; Energy production and conversion	UDP-glucoronosyl and UDP-glucosyl transferase	UDP-glycosyltransferase 74G1 OS=Stevia rebaudiana OX=55670 GN=UGT74G1 PE=1 SV=1	S	Function unknown	UDP-glycosyltransferase 74G1-like [Solanum pennellii]
gene.Soltu.DM.01G045970.1	628	541	533	3237	2634	3031	3039	3003	2734	58.4159	44.6322	46.1636	268.042	247.288	256.735	262.179	257.147	264.303	2.54517e-118	2.30628	up	[S]	Function unknown	Cellular Component: extracellular region (GO:0005576);;	K13449|7.0e-67|sot:102590997|K13449 pathogenesis-related protein 1 | (RefSeq) basic form of pathogenesis-related protein 1-like	MAPK signaling pathway - plant (ko04016);; Plant hormone signal transduction (ko04075);; Plant-pathogen interaction (ko04626)	[S]	Function unknown	Cysteine-rich secretory protein family	Basic form of pathogenesis-related protein 1 OS=Nicotiana tabacum OX=4097 PE=3 SV=1	S	Function unknown	PREDICTED: basic form of pathogenesis-related protein 1-like [Solanum tuberosum]
gene.Soltu.DM.03G000720.1	13	20	22	37	33	53	34	54	48	0.18936	0.257339	0.291508	0.474554	0.491978	0.710922	0.452844	0.732494	0.732827	0.00744565	1.17959	up	--	--	Molecular Function: ADP binding (GO:0043531);;	K13457|2.7e-39|gmx:102661118|K13457 disease resistance protein RPM1 | (RefSeq) disease resistance protein RPM1	Plant-pathogen interaction (ko04626)	[T]	Signal transduction mechanisms	NB-ARC domain	Probable disease resistance protein At1g59620 OS=Arabidopsis thaliana OX=3702 GN=At1g59620 PE=2 SV=3	S	Function unknown	hypothetical protein EJD97_016032 [Solanum chilense]
Solanum_tuberosum_newGene_6684	263	268	299	687	575	621	865	1071	872	3.50067	3.16075	3.70404	8.14287	7.72982	7.52558	10.6872	13.1363	12.0739	2.50266e-08	1.44378	up	[K]	Transcription	Molecular Function: nucleic acid binding (GO:0003676);; Molecular Function: zinc ion binding (GO:0008270);;	K09250|2.55e-49|sot:102586895|K09250 cellular nucleic acid-binding protein | (RefSeq) cold shock domain-containing protein 3	--	[J]	Translation, ribosomal structure and biogenesis	Zinc knuckle	Cold shock domain-containing protein 3 OS=Arabidopsis thaliana OX=3702 GN=CSP3 PE=1 SV=1	J	Translation, ribosomal structure and biogenesis	PREDICTED: cold shock domain-containing protein 3 [Solanum tuberosum]
gene.Soltu.DM.10G014410.1	110	245	109	16	25	23	2	6	2	7.12409	14.0894	6.56402	0.883324	1.58609	1.34192	0.075022	0.355324	0.114929	7.20342e-06	-3.71534	down	[S]	Function unknown	Cellular Component: extracellular space (GO:0005615);;	K13449|7.9e-88|sot:102595771|K13449 pathogenesis-related protein 1 | (RefSeq) pathogenesis-related protein 1C-like	MAPK signaling pathway - plant (ko04016);; Plant hormone signal transduction (ko04075);; Plant-pathogen interaction (ko04626)	[S]	Function unknown	Cysteine-rich secretory protein family	Pathogenesis-related protein 1C OS=Nicotiana tabacum OX=4097 PE=2 SV=3	S	Function unknown	PREDICTED: pathogenesis-related protein 1C-like, partial [Solanum tuberosum]
gene.Soltu.DM.01G034640.1	214	274	298	120	101	90	89	81	138	17.2563	19.6497	22.4195	8.61469	8.20771	6.58877	6.66922	6.02813	11.5774	3.45789e-07	-1.39218	down	--	--	--	--	--	--	--	Arabinogalactan peptide	Arabinogalactan protein 16 OS=Arabidopsis thaliana OX=3702 GN=AGP16 PE=1 SV=1	S	Function unknown	hypothetical protein [Solanum tuberosum]
gene.Soltu.DM.02G023320.1	80	106	103	308	255	286	143	185	133	3.1828	3.74601	3.84377	10.9691	10.3036	10.4157	5.30876	6.8093	5.5082	0.000864159	1.10061	up	--	--	--	--	--	--	--	--	--	S	Function unknown	PREDICTED: uncharacterized protein LOC102578369 isoform X1 [Solanum tuberosum]
gene.Soltu.DM.09G025850.1	49774	49313	47661	17484	16080	14995	29596	33133	29235	2465.64	2168.75	2197.9	770.582	803.521	676.11	1358.83	1510.14	1504.37	0.00145783	-1.107	down	--	--	Molecular Function: serine-type endopeptidase inhibitor activity (GO:0004867);; Biological Process: response to wounding (GO:0009611);;	K20769|3.4e-10|mesc:110611169|K20769 fatty acid omega-hydroxylase [EC:1.14.-.-] | (RefSeq) cytochrome P450 94A2-like	Cutin, suberine and wax biosynthesis (ko00073)	--	--	Potato inhibitor I family	Proteinase inhibitor 1 OS=Solanum tuberosum OX=4113 PE=3 SV=1	S	Function unknown	PREDICTED: proteinase inhibitor 1-like [Solanum tuberosum]
gene.Soltu.DM.09G004560.1	201	205	184	1161	929	1094	383	379	338	8.54367	7.7156	7.27321	43.9292	39.8132	42.3451	15.058	14.795	14.9097	0.000142781	1.76126	up	--	--	--	--	--	--	--	VQ motif	--	--	--	PREDICTED: anaphase-promoting complex subunit CDC27-like [Solanum tuberosum]
gene.Soltu.DM.02G004080.1	15	31	26	65	51	65	214	244	205	0.657168	1.22259	1.07542	2.6204	2.30314	2.65545	8.99789	10.1722	9.66303	0.00046021	2.53962	up	--	--	--	--	--	--	--	--	--	--	--	hypothetical protein EJD97_007469 [Solanum chilense]
gene.Soltu.DM.03G016850.4	185	219	422	96	184	101	117	119	103	3.56931	3.75492	7.57755	1.64013	3.58231	1.76881	2.08837	2.10985	2.05214	0.00243381	-1.25464	down	--	--	Cellular Component: chloroplast (GO:0009507);; Biological Process: cytochrome b6f complex assembly (GO:0010190);;	--	--	--	--	Cofactor assembly of complex C subunit B, CCB2/CCB4	Protein COFACTOR ASSEMBLY OF COMPLEX C SUBUNIT B CCB2, chloroplastic OS=Arabidopsis thaliana OX=3702 GN=CCB2 PE=1 SV=1	S	Function unknown	PREDICTED: protein COFACTOR ASSEMBLY OF COMPLEX C SUBUNIT B CCB2, chloroplastic isoform X2 [Solanum tuberosum]
gene.Soltu.DM.05G010770.1	492	642	640	1490	1328	1441	1979	2381	2055	3.30525	3.82586	3.99825	8.90056	8.9983	8.80961	12.3223	14.712	14.341	4.08546e-10	1.54427	up	[V]	Defense mechanisms	Molecular Function: ATP binding (GO:0005524);; Cellular Component: integral component of membrane (GO:0016021);; Molecular Function: ATPase activity (GO:0016887);; Molecular Function: ATPase activity, coupled to transmembrane movement of substances (GO:0042626);;	K05666|0.0e+00|aip:110262356|K05666 ATP-binding cassette, subfamily C (CFTR/MRP), member 2 | (RefSeq) ABC transporter C family member 3-like isoform X1	ABC transporters (ko02010)	[Q]	Secondary metabolites biosynthesis, transport and catabolism	ABC transporter	ABC transporter C family member 3 OS=Arabidopsis thaliana OX=3702 GN=ABCC3 PE=1 SV=1	V	Defense mechanisms	PREDICTED: putative ABC transporter C family member 15 [Solanum tuberosum]
gene.Soltu.DM.02G025810.1	25666	29702	26370	10569	9123	10456	19562	17391	15110	1036.97	1065.41	991.849	379.906	371.794	384.526	732.522	646.492	634.142	0.000664426	-1.03692	down	[G]	Carbohydrate transport and metabolism	Molecular Function: monooxygenase activity (GO:0004497);; Cellular Component: chloroplast (GO:0009507);; Biological Process: photorespiration (GO:0009853);; Biological Process: carbon fixation (GO:0015977);; Biological Process: photosynthesis (GO:0015979);; Molecular Function: ribulose-bisphosphate carboxylase activity (GO:0016984);;	K01602|1.1e-101|sot:102600888|K01602 ribulose-bisphosphate carboxylase small chain [EC:4.1.1.39] | (RefSeq) rbcS2c; ribulose bisphosphate carboxylase small chain 2C, chloroplastic	Glyoxylate and dicarboxylate metabolism (ko00630);; Carbon fixation in photosynthetic organisms (ko00710);; Carbon metabolism (ko01200)	--	--	Ribulose bisphosphate carboxylase, small chain	Ribulose bisphosphate carboxylase small chain 2C, chloroplastic OS=Solanum tuberosum OX=4113 GN=RBCS-2C PE=3 SV=1	C	Energy production and conversion	PREDICTED: ribulose bisphosphate carboxylase small chain 2C, chloroplastic [Solanum tuberosum]
gene.Soltu.DM.10G022960.1	392	397	285	1019	964	912	1131	1193	1128	11.1584	10.0467	7.54626	25.8237	27.6965	23.6459	29.8591	31.2721	33.3813	7.77651e-17	1.50857	up	[O]	Posttranslational modification, protein turnover, chaperones	Biological Process: response to acid chemical (GO:0001101);; Molecular Function: molecular_function (GO:0003674);; Molecular Function: catalytic activity (GO:0003824);; Molecular Function: glutathione transferase activity (GO:0004364);; Molecular Function: protein binding (GO:0005515);; Cellular Component: cellular_component (GO:0005575);; Cellular Component: intracellular (GO:0005622);; Cellular…	K00799|6.5e-125|sot:102587200|K00799 glutathione S-transferase [EC:2.5.1.18] | (RefSeq) probable glutathione S-transferase	Glutathione metabolism (ko00480)	[O]	Posttranslational modification, protein turnover, chaperones	Glutathione S-transferase, N-terminal domain	Probable glutathione S-transferase OS=Nicotiana tabacum OX=4097 PE=2 SV=1	O	Posttranslational modification, protein turnover, chaperones	PREDICTED: probable glutathione S-transferase [Solanum tuberosum]
gene.Soltu.DM.03G018610.1	116	206	158	67	32	47	67	37	51	3.63556	5.76119	4.6265	1.85861	1.00971	1.33238	1.94821	1.05412	1.64146	1.59915e-07	-1.72277	down	--	--	Molecular Function: endopeptidase inhibitor activity (GO:0004866);;	--	--	--	--	Trypsin and protease inhibitor	--	--	--	PREDICTED: cysteine protease inhibitor 10-like [Solanum tuberosum]
gene.Soltu.DM.12G010470.1	13	498	38	2	29	9	0	8	4	0.191426	6.65428	0.525475	0.024046	0.427905	0.111659	0	0.104565	0.06049	0.0030015	-4.34752	down	--	--	Cellular Component: integral component of membrane (GO:0016021);;	--	--	--	--	Sulfite exporter TauE/SafE	Sulfite exporter TauE/SafE family protein 3 OS=Arabidopsis thaliana OX=3702 GN=At2g25737 PE=2 SV=1	S	Function unknown	PREDICTED: uncharacterized protein LOC102590357 [Solanum tuberosum]
gene.Soltu.DM.02G008050.1	113	97	62	249	195	234	375	368	340	2.68706	2.03868	1.35562	5.26896	4.68567	5.07589	8.28262	8.06548	8.40649	3.82043e-06	1.64039	up	--	--	Molecular Function: transcription factor activity, sequence-specific DNA binding (GO:0003700);; Cellular Component: nucleus (GO:0005634);; Molecular Function: sequence-specific DNA binding (GO:0043565);;	K13425|5.4e-22|han:110922953|K13425 WRKY transcription factor 22 | (RefSeq) WRKY transcription factor 22-like	MAPK signaling pathway - plant (ko04016);; Plant-pathogen interaction (ko04626)	--	--	WRKY DNA -binding domain	Probable WRKY transcription factor 7 OS=Arabidopsis thaliana OX=3702 GN=WRKY7 PE=1 SV=1	K	Transcription	PREDICTED: probable WRKY transcription factor 15 [Solanum tuberosum]
gene.Soltu.DM.10G021470.1	294	278	287	115	87	132	169	154	133	6.21967	5.23137	5.66011	2.16139	1.86109	2.54945	3.31378	3.00056	2.9147	4.00041e-06	-1.1841	down	[H]	Coenzyme transport and metabolism	Molecular Function: O-methyltransferase activity (GO:0008171);; Biological Process: methylation (GO:0032259);; Molecular Function: protein dimerization activity (GO:0046983);;	K13066|2.9e-74|smo:SELMODRAFT_450945|K13066 caffeic acid 3-O-methyltransferase [EC:2.1.1.68] | (RefSeq) COMT1-2; caffeic acid O-methyltransferase	Phenylpropanoid biosynthesis (ko00940)	[R]	General function prediction only	O-methyltransferase domain	Caffeic acid 3-O-methyltransferase 2 OS=Ocimum basilicum OX=39350 GN=COMT2 PE=2 SV=1	S	Function unknown	PREDICTED: caffeic acid 3-O-methyltransferase 2-like [Solanum tuberosum]
gene.Soltu.DM.11G013010.2	132	126	168	47	20	45	18	24	17	3.87057	3.27657	4.59279	1.2181	0.587893	1.18147	0.483529	0.645198	0.507371	6.58187e-10	-2.41509	down	--	--	--	--	--	--	--	--	--	V	Defense mechanisms	--
gene.Soltu.DM.01G033960.1	729	872	645	1396	1271	1317	3011	3177	2740	8.97712	9.53304	7.39791	15.304	15.8014	14.7735	34.3879	36.0294	35.0779	0.000365217	1.48979	up	[T]	Signal transduction mechanisms	Cellular Component: integral component of membrane (GO:0016021);; Molecular Function: oxidoreductase activity (GO:0016491);;	K00521|0.0e+00|sot:102606355|K00521 ferric-chelate reductase [EC:1.16.1.7] | (RefSeq) ferric reduction oxidase 2-like	--	[PQ]	Inorganic ion transport and metabolism;; Secondary metabolites biosynthesis, transport and catabolism	Ferric reductase NAD binding domain	Ferric reduction oxidase 2 OS=Arabidopsis thaliana OX=3702 GN=FRO2 PE=1 SV=2	U	Intracellular trafficking, secretion, and vesicular transport	PREDICTED: ferric reduction oxidase 2-like [Solanum tuberosum]
gene.Soltu.DM.10G005140.1	60	78	43	15	11	8	4	6	20	2.27713	2.61076	1.50897	0.497847	0.413698	0.26684	0.131002	0.185269	0.776413	3.95352e-05	-2.53401	down	--	--	--	--	--	--	--	Organ specific protein	Organ-specific protein P4 OS=Pisum sativum OX=3888 PE=2 SV=1	S	Function unknown	organ-specific protein S2-like isoform X1 [Solanum pennellii]
gene.Soltu.DM.07G025020.1	10	21	21	69	93	66	83	104	76	0.145762	0.267418	0.286427	0.91232	1.40098	0.89725	1.14831	1.43379	1.1768	2.19664e-09	2.19276	up	[T]	Signal transduction mechanisms	Molecular Function: protein serine/threonine kinase activity (GO:0004674);; Molecular Function: ATP binding (GO:0005524);; Cellular Component: plasma membrane (GO:0005886);; Biological Process: protein phosphorylation (GO:0006468);; Cellular Component: integral component of membrane (GO:0016021);; Biological Process: recognition of pollen (GO:0048544);;	K01183|4.4e-42|nsy:104241083|K01183 chitinase [EC:3.2.1.14] | (RefSeq) chitinase-3-like protein 2	Amino sugar and nucleotide sugar metabolism (ko00520)	--	--	D-mannose binding lectin	G-type lectin S-receptor-like serine/threonine-protein kinase At4g27290 OS=Arabidopsis thaliana OX=3702 GN=At4g27290 PE=3 SV=4	T	Signal transduction mechanisms	PREDICTED: G-type lectin S-receptor-like serine/threonine-protein kinase At4g27290 [Solanum tuberosum]
gene.Soltu.DM.11G008980.3	586	433	447	213	211	262	272	297	189	13.7592	9.02006	9.77009	4.44865	4.98458	5.59628	5.90968	6.42101	4.60244	4.38494e-07	-1.10019	down	--	--	Cellular Component: cellular_component (GO:0005575);; Cellular Component: intracellular (GO:0005622);; Cellular Component: cell (GO:0005623);; Cellular Component: cytoplasm (GO:0005737);; Biological Process: coenzyme metabolic process (GO:0006732);; Biological Process: biological_process (GO:0008150);; Biological Process: metabolic process (GO:0008152);; Biological Process: biosynthetic process (…	K17637|1.3e-34|obr:102713820|K17637 exocyst complex component 2 | (RefSeq) exocyst complex component SEC5A-like	--	--	--	PAP_fibrillin	Fibrillin-5, chloroplastic OS=Arabidopsis thaliana OX=3702 GN=FBN5 PE=1 SV=1	S	Function unknown	PREDICTED: probable plastid-lipid-associated protein 7, chloroplastic isoform X2 [Solanum tuberosum]
gene.Soltu.DM.03G004830.1	2599	3240	2878	1295	1156	1249	1708	1697	1505	66.4469	73.5433	68.492	29.4527	29.8181	29.0716	40.467	39.9128	39.9648	6.65643e-09	-1.06732	down	--	--	Cellular Component: photosystem I (GO:0009522);; Cellular Component: photosystem II (GO:0009523);; Cellular Component: chloroplast thylakoid membrane (GO:0009535);; Biological Process: photosynthesis, light harvesting (GO:0009765);; Cellular Component: integral component of membrane (GO:0016021);; Molecular Function: chlorophyll binding (GO:0016168);; Biological Process: protein-chromophore linka…	K08912|1.6e-154|sot:102586241|K08912 light-harvesting complex II chlorophyll a/b binding protein 1 | (RefSeq) chlorophyll a-b binding protein 40, chloroplastic	Photosynthesis - antenna proteins (ko00196)	--	--	Chlorophyll A-B binding protein	Chlorophyll a-b binding protein 50, chloroplastic OS=Nicotiana tabacum OX=4097 GN=CAB50 PE=2 SV=1	J	Translation, ribosomal structure and biogenesis	PREDICTED: chlorophyll a-b binding protein 40, chloroplastic [Solanum tuberosum]
gene.Soltu.DM.06G024980.1	545	693	600	1381	1276	1286	1197	1470	1187	13.6585	15.4166	13.9991	30.8012	32.2771	29.3517	27.821	33.918	30.9125	1.05771e-31	1.02536	up	[O]	Posttranslational modification, protein turnover, chaperones	Molecular Function: protein binding (GO:0005515);;	K00799|4.0e-130|sot:102584494|K00799 glutathione S-transferase [EC:2.5.1.18] | (RefSeq) probable glutathione S-transferase	Glutathione metabolism (ko00480)	[O]	Posttranslational modification, protein turnover, chaperones	Glutathione S-transferase, N-terminal domain	Probable glutathione S-transferase OS=Glycine max OX=3847 GN=HSP26-A PE=2 SV=1	O	Posttranslational modification, protein turnover, chaperones	PREDICTED: probable glutathione S-transferase [Solanum tuberosum]
gene.Soltu.DM.05G010270.1	359	281	274	1341	1209	1303	571	582	480	6.78635	4.72333	4.82101	22.6107	23.1021	22.4634	10.0164	10.1467	9.43273	0.000145924	1.48515	up	--	--	Cellular Component: plasma membrane (GO:0005886);;	--	--	[R]	General function prediction only	WD domain, G-beta repeat	Protein JINGUBANG OS=Arabidopsis thaliana OX=3702 GN=JGB PE=1 SV=1	S	Function unknown	PREDICTED: E3 ubiquitin-protein ligase TRAF7 [Solanum tuberosum]
gene.Soltu.DM.10G017910.3	1445	1752	1691	3608	3266	2820	4978	4886	4486	39.4088	42.4128	42.9337	87.5449	89.8302	69.9845	125.816	122.595	127.078	1.75982e-07	1.25301	up	[G]	Carbohydrate transport and metabolism	Molecular Function: chitinase activity (GO:0004568);; Biological Process: carbohydrate metabolic process (GO:0005975);; Biological Process: chitin catabolic process (GO:0006032);; Molecular Function: chitin binding (GO:0008061);; Biological Process: cell wall macromolecule catabolic process (GO:0016998);;	K20547|3.6e-185|sly:544148|K20547 basic endochitinase B [EC:3.2.1.14] | (RefSeq) CHI9; basic 30 kDa endochitinase precursor	Amino sugar and nucleotide sugar metabolism (ko00520);; MAPK signaling pathway - plant (ko04016)	[R]	General function prediction only	Chitinase class I	Endochitinase 2 (Fragment) OS=Solanum tuberosum OX=4113 GN=CHTB2 PE=2 SV=1	G	Carbohydrate transport and metabolism	RecName: Full=Endochitinase 2; Flags: Precursor [Solanum tuberosum]
gene.Soltu.DM.09G027720.2	190	423	188	841	830	841	618	390	309	7.33666	14.5241	6.76173	28.9949	32.4233	29.6542	22.1999	13.8861	12.4104	0.00533853	1.20213	up	--	--	Molecular Function: protein phosphatase inhibitor activity (GO:0004864);; Biological Process: defense response (GO:0006952);; Biological Process: response to biotic stimulus (GO:0009607);; Biological Process: abscisic acid-activated signaling pathway (GO:0009738);; Molecular Function: abscisic acid binding (GO:0010427);; Molecular Function: signaling receptor activity (GO:0038023);;	--	--	--	--	Pathogenesis-related protein Bet v 1 family	Pathogenesis-related protein STH-2 OS=Solanum tuberosum OX=4113 GN=STH-2 PE=2 SV=1	--	--	pathogenesis-related protein STH-2 [Solanum tuberosum]
gene.Soltu.DM.11G022750.1	4	8	8	67	35	51	53	67	86	0.202161	0.381239	0.396538	3.29276	1.95845	2.59503	2.74094	3.42435	4.94559	5.26723e-09	3.1235	up	--	--	--	--	--	--	--	--	Kiwellin OS=Actinidia chinensis var. chinensis OX=1590841 GN=KWL1 PE=1 SV=2	S	Function unknown	kiwellin-like [Solanum lycopersicum]
Solanum_tuberosum_newGene_1015	32	31	31	234	266	286	203	238	233	0.247448	0.207943	0.219652	1.89233	2.43989	2.52194	1.70796	2.53995	3.44669	9.34234e-41	2.89426	up	--	--	Cellular Component: integral component of membrane (GO:0016021);;	--	--	--	--	--	--	--	--	--
gene.Soltu.DM.01G022120.1	151	211	191	34	40	36	26	24	27	1.88713	2.34044	2.2182	0.367285	0.497236	0.401799	0.293322	0.268062	0.338833	1.26356e-29	-2.62306	down	--	--	Biological Process: ubiquitin-dependent protein catabolic process (GO:0006511);; Cellular Component: cullin-RING ubiquitin ligase complex (GO:0031461);; Molecular Function: ubiquitin protein ligase binding (GO:0031625);;	K03347|0.0e+00|sly:101249757|K03347 cullin 1 | (RefSeq) cullin-1	Ubiquitin mediated proteolysis (ko04120);; Protein processing in endoplasmic reticulum (ko04141)	[D]	Cell cycle control, cell division, chromosome partitioning	Cullin family	Cullin-1 OS=Oryza sativa subsp. japonica OX=39947 GN=CUL1 PE=1 SV=1	O	Posttranslational modification, protein turnover, chaperones	cullin-1 [Solanum lycopersicum]
gene.Soltu.DM.02G014000.4	4041	6240	3290	1487	642	2199	2710	1614	1854	135.916	186.345	103.004	44.4788	21.7621	67.3367	84.4663	49.9562	64.7637	0.000804087	-1.41218	down	--	--	Cellular Component: photosystem I (GO:0009522);; Cellular Component: photosystem II (GO:0009523);; Cellular Component: chloroplast thylakoid membrane (GO:0009535);; Biological Process: photosynthesis, light harvesting (GO:0009765);; Cellular Component: integral component of membrane (GO:0016021);; Molecular Function: chlorophyll binding (GO:0016168);; Biological Process: protein-chromophore linka…	K08912|8.8e-153|sot:102594096|K08912 light-harvesting complex II chlorophyll a/b binding protein 1 | (RefSeq) chlorophyll a-b binding protein 1C, chloroplastic	Photosynthesis - antenna proteins (ko00196)	--	--	Chlorophyll A-B binding protein	Chlorophyll a-b binding protein 1B, chloroplastic OS=Solanum lycopersicum OX=4081 GN=CAB1B PE=3 SV=1	J	Translation, ribosomal structure and biogenesis	PREDICTED: chlorophyll a-b binding protein 1C, chloroplastic [Solanum tuberosum]
gene.Soltu.DM.10G017910.1	12952	13235	12374	26982	22715	26281	31564	31037	26803	343.134	311.295	305.201	636.043	607.086	633.804	775.081	756.592	737.677	8.15499e-16	1.03932	up	[G]	Carbohydrate transport and metabolism	Molecular Function: chitinase activity (GO:0004568);; Biological Process: carbohydrate metabolic process (GO:0005975);; Biological Process: chitin catabolic process (GO:0006032);; Molecular Function: chitin binding (GO:0008061);; Biological Process: cell wall macromolecule catabolic process (GO:0016998);;	K20547|3.9e-187|sly:544148|K20547 basic endochitinase B [EC:3.2.1.14] | (RefSeq) CHI9; basic 30 kDa endochitinase precursor	Amino sugar and nucleotide sugar metabolism (ko00520);; MAPK signaling pathway - plant (ko04016)	[R]	General function prediction only	Chitinase class I	Endochitinase 2 (Fragment) OS=Solanum tuberosum OX=4113 GN=CHTB2 PE=2 SV=1	G	Carbohydrate transport and metabolism	RecName: Full=Endochitinase 2; Flags: Precursor [Solanum tuberosum]
gene.Soltu.DM.08G002280.1	38	36	43	112	89	92	213	200	169	0.663464	0.554988	0.703665	1.74302	1.56888	1.4669	3.45742	3.22945	3.06972	4.26231e-05	1.85288	up	[G]	Carbohydrate transport and metabolism	Molecular Function: UDP-glycosyltransferase activity (GO:0008194);;	K13691|3.8e-244|sot:102579665|K13691 pathogen-inducible salicylic acid glucosyltransferase [EC:2.4.1.-] | (RefSeq) UDP-glycosyltransferase 74G1-like	--	[GC]	Carbohydrate transport and metabolism;; Energy production and conversion	UDP-glucoronosyl and UDP-glucosyl transferase	UDP-glycosyltransferase 74G1 OS=Stevia rebaudiana OX=55670 GN=UGT74G1 PE=1 SV=1	S	Function unknown	PREDICTED: UDP-glycosyltransferase 74G1-like [Solanum tuberosum]
gene.Soltu.DM.08G015190.1	146	66	81	219	213	218	342	385	370	2.13043	0.852332	1.09986	2.84398	3.1381	2.89559	4.62599	5.16905	5.61786	0.000646926	1.50624	up	--	--	Cellular Component: integral component of membrane (GO:0016021);;	K15503|2.5e-09|cqi:110718790|K15503 serine/threonine-protein phosphatase 6 regulatory ankyrin repeat subunit B | (RefSeq) uncharacterized protein LOC110718790 isoform X1	--	[R]	General function prediction only	Ankyrin repeats (3 copies)	Ankyrin repeat-containing protein At2g01680 OS=Arabidopsis thaliana OX=3702 GN=At2g01680 PE=2 SV=1	S	Function unknown	ankyrin repeat-containing protein At5g02620-like [Solanum pennellii]
gene.Soltu.DM.01G008270.1	33	36	41	82	101	113	135	112	112	0.619628	0.616835	0.730075	1.40723	1.96569	1.97345	2.41726	1.98303	2.23159	2.41012e-07	1.51945	up	--	--	Cellular Component: integral component of membrane (GO:0016021);; Molecular Function: transmembrane transporter activity (GO:0022857);; Biological Process: nitrogen compound transport (GO:0071705);;	--	--	--	--	Ureide permease	Ureide permease 2 OS=Arabidopsis thaliana OX=3702 GN=UPS2 PE=1 SV=2	S	Function unknown	PREDICTED: ureide permease 1-like isoform X3 [Solanum tuberosum]
gene.Soltu.DM.04G007840.1	61	47	65	2	0	0	6	2	0	2.66613	1.81628	2.6562	0.073607	0	0	0.237887	0.059808	0	2.10881e-07	-5.19548	down	--	--	Molecular Function: electron carrier activity (GO:0009055);; Molecular Function: protein disulfide oxidoreductase activity (GO:0015035);;	K03676|9.8e-52|sot:107060512|K03676 glutaredoxin 3 | (RefSeq) monothiol glutaredoxin-S1-like	--	[O]	Posttranslational modification, protein turnover, chaperones	Glutaredoxin	Monothiol glutaredoxin-S2 OS=Arabidopsis thaliana OX=3702 GN=GRXS2 PE=3 SV=1	O	Posttranslational modification, protein turnover, chaperones	PREDICTED: monothiol glutaredoxin-S1-like [Solanum tuberosum]
gene.Soltu.DM.03G023550.1	4708	5710	4705	1297	1117	1377	502	772	523	208.026	224.03	193.549	50.9865	49.7604	55.3755	20.5221	31.3714	23.9714	2.08889e-17	-2.52219	down	--	--	Molecular Function: serine-type endopeptidase inhibitor activity (GO:0004867);; Cellular Component: integral component of membrane (GO:0016021);;	--	--	--	--	Potato type II proteinase inhibitor family	Proteinase inhibitor type-2 OS=Solanum tuberosum OX=4113 PE=3 SV=1	--	--	PREDICTED: proteinase inhibitor type-2 [Solanum tuberosum]
gene.Soltu.DM.10G029590.1	72	144	116	354	260	289	191	185	146	1.59237	2.81916	2.38802	6.96289	5.79317	5.81884	3.90123	3.75852	3.35715	0.00237791	1.03409	up	--	--	Molecular Function: channel activity (GO:0015267);; Cellular Component: integral component of membrane (GO:0016021);;	K09875|1.8e-123|spen:107032100|K09875 aquaporin SIP | (RefSeq) aquaporin SIP1-1-like isoform X1	--	[G]	Carbohydrate transport and metabolism	Major intrinsic protein	Aquaporin SIP1-1 OS=Oryza sativa subsp. japonica OX=39947 GN=SIP1-1 PE=2 SV=2	G	Carbohydrate transport and metabolism	PREDICTED: aquaporin SIP1-1-like isoform X2 [Solanum tuberosum]
gene.Soltu.DM.08G014490.1	36	51	39	132	78	119	110	64	64	0.807745	1.02733	0.825096	2.67854	1.79058	2.47584	2.31615	1.33739	1.51727	0.00207629	1.09801	up	[E]	Amino acid transport and metabolism	Molecular Function: carboxy-lyase activity (GO:0016831);; Biological Process: carboxylic acid metabolic process (GO:0019752);; Molecular Function: pyridoxal phosphate binding (GO:0030170);;	K22427|8.4e-213|sly:101248599|K22427 phenylalanine decarboxylase [EC:4.1.1.53] | (RefSeq) histidine decarboxylase-like	Phenylalanine metabolism (ko00360)	[E]	Amino acid transport and metabolism	Pyridoxal-dependent decarboxylase conserved domain	Histidine decarboxylase OS=Solanum lycopersicum OX=4081 GN=HDC PE=2 SV=1	E	Amino acid transport and metabolism	histidine decarboxylase-like [Solanum lycopersicum]
gene.Soltu.DM.08G013290.1	281	364	299	174	197	177	103	80	114	5.80156	6.67929	5.75675	3.19195	4.10279	3.31507	1.97192	1.51863	2.4297	0.000236355	-1.22341	down	[I]	Lipid transport and metabolism	Biological Process: lipid metabolic process (GO:0006629);; Cellular Component: integral component of membrane (GO:0016021);; Molecular Function: oxidoreductase activity (GO:0016491);;	K21737|1.2e-227|sot:102599871|K21737 acyl-lipid Delta6-acetylenase / acyl-lipid (9-3)-desaturase [EC:1.14.19.38 1.14.19.47] | (RefSeq) delta(8)-fatty-acid desaturase 1-like	--	[I]	Lipid transport and metabolism	Fatty acid desaturase	Acyl-lipid (9-3)-desaturase OS=Borago officinalis OX=13363 PE=1 SV=1	I	Lipid transport and metabolism	PREDICTED: delta(8)-fatty-acid desaturase 1-like [Solanum tuberosum]
gene.Soltu.DM.01G002210.1	170	168	190	68	44	79	39	44	42	4.51726	3.95813	4.70266	1.60194	1.17478	1.91193	0.96075	1.05951	1.13797	2.59133e-12	-1.82207	down	--	--	Molecular Function: oxidoreductase activity (GO:0016491);; Molecular Function: metal ion binding (GO:0046872);;	K04125|2.7e-19|dcr:108225942|K04125 gibberellin 2beta-dioxygenase [EC:1.14.11.13] | (RefSeq) gibberellin 2-beta-dioxygenase 8-like	Diterpenoid biosynthesis (ko00904)	[QR]	Secondary metabolites biosynthesis, transport and catabolism;; General function prediction only	2OG-Fe(II) oxygenase superfamily	Probable 2-oxoglutarate-dependent dioxygenase AOP1.2 OS=Arabidopsis thaliana OX=3702 GN=AOP1.2 PE=2 SV=1	S	Function unknown	PREDICTED: probable 2-oxoglutarate-dependent dioxygenase AOP1.2 [Solanum tuberosum]
gene.Soltu.DM.09G001590.1	17	10	16	107	87	66	65	85	52	0.216819	0.114697	0.186924	1.23389	1.14188	0.780055	0.77475	1.01172	0.693882	5.36763e-10	2.34184	up	[T]	Signal transduction mechanisms	Molecular Function: protein serine/threonine kinase activity (GO:0004674);; Molecular Function: ATP binding (GO:0005524);; Cellular Component: integral component of membrane (GO:0016021);; Biological Process: recognition of pollen (GO:0048544);;	K13420|4.7e-64|mesc:110601988|K13420 LRR receptor-like serine/threonine-protein kinase FLS2 [EC:2.7.11.1] | (RefSeq) LRR receptor-like serine/threonine-protein kinase FLS2	MAPK signaling pathway - plant (ko04016);; Plant-pathogen interaction (ko04626)	--	--	Protein kinase domain	Putative receptor protein kinase ZmPK1 OS=Zea mays OX=4577 GN=PK1 PE=2 SV=2	T	Signal transduction mechanisms	PREDICTED: putative receptor protein kinase ZmPK1 [Solanum tuberosum]
gene.Soltu.DM.03G030290.1	3749	4732	4769	590	519	622	1055	1065	947	151.643	169.944	179.58	21.2351	21.1524	22.8964	39.5342	39.6252	39.7686	2.61559e-18	-2.50733	down	--	--	Molecular Function: chitin binding (GO:0008061);;	K20547|1.7e-07|thj:104816920|K20547 basic endochitinase B [EC:3.2.1.14] | (RefSeq) endochitinase-like isoform X1	Amino sugar and nucleotide sugar metabolism (ko00520);; MAPK signaling pathway - plant (ko04016)	--	--	Chitin recognition protein	Chitin-binding lectin 1 OS=Solanum tuberosum OX=4113 PE=1 SV=2	--	--	RecName: Full=Chitin-binding lectin 1; AltName: Full=PL-I; Flags: Precursor [Solanum tuberosum]
gene.Soltu.DM.02G029530.1	161	295	121	100	110	95	95	105	79	3.13999	5.12134	2.19938	1.74422	2.17224	1.68968	1.71117	1.88361	1.59053	0.00113825	-1.02432	down	[QV]	Secondary metabolites biosynthesis, transport and catabolism;; Defense mechanisms	Molecular Function: monooxygenase activity (GO:0004497);; Molecular Function: iron ion binding (GO:0005506);; Molecular Function: oxidoreductase activity, acting on paired donors, with incorporation or reduction of molecular oxygen (GO:0016705);; Molecular Function: heme binding (GO:0020037);;	K23810|1.6e-152|vvi:100232891|K23810 (E)-8-carboxylinalool synthase [EC:1.14.14.-] | (RefSeq) GFH2; ripening-related P-450 enzyme-like	Monoterpenoid biosynthesis (ko00902)	[Q]	Secondary metabolites biosynthesis, transport and catabolism	Cytochrome P450	Geraniol 8-hydroxylase OS=Swertia mussotii OX=137888 GN=CYP76B10 PE=1 SV=1	Q	Secondary metabolites biosynthesis, transport and catabolism	PREDICTED: geraniol 8-hydroxylase-like [Solanum tuberosum]
gene.Soltu.DM.01G032990.1	17	13	15	40	49	66	58	43	29	0.397219	0.26317	0.314188	0.828353	1.14662	1.40929	1.24309	0.917171	0.68891	0.000254732	1.58579	up	--	--	Molecular Function: nutrient reservoir activity (GO:0045735);;	--	--	--	--	Cupin	13S globulin seed storage protein 2 OS=Fagopyrum esculentum OX=3617 GN=FA18 PE=2 SV=1	S	Function unknown	PREDICTED: 13S globulin seed storage protein 2-like [Solanum tuberosum]
gene.Soltu.DM.12G009510.1	72	81	107	271	306	229	337	449	369	1.59139	1.58548	2.19169	5.32737	6.81339	4.59358	6.90113	9.11519	8.47444	9.19825e-10	1.86565	up	[I]	Lipid transport and metabolism	Biological Process: lipid metabolic process (GO:0006629);; Cellular Component: integral component of membrane (GO:0016021);; Molecular Function: oxidoreductase activity, acting on paired donors, with oxidation of a pair of donors resulting in the reduction of molecular oxygen to two molecules of water (GO:0016717);;	K10256|2.0e-190|cann:107851256|K10256 omega-6 fatty acid desaturase / acyl-lipid omega-6 desaturase (Delta-12 desaturase) [EC:1.14.19.6 1.14.19.22] | (RefSeq) delta(12)-acyl-lipid-desaturase-like	Biosynthesis of unsaturated fatty acids (ko01040);; Fatty acid metabolism (ko01212)	--	--	Fatty acid desaturase	Delta(12)-fatty-acid desaturase FAD2 OS=Vernicia fordii OX=73154 GN=FAD2 PE=1 SV=1	I	Lipid transport and metabolism	PREDICTED: delta(12) oleic acid desaturase FAD2-like [Solanum tuberosum]
gene.Soltu.DM.12G029560.1	18	32	22	62	58	65	72	66	60	0.829717	1.29389	0.935514	2.54627	2.70614	2.73745	3.09348	2.83825	2.88005	5.6279e-06	1.35801	up	[HC]	Coenzyme transport and metabolism;; Energy production and conversion	Molecular Function: FAD binding (GO:0071949);;	K09838|2.3e-08|smo:SELMODRAFT_172667|K09838 zeaxanthin epoxidase [EC:1.14.15.21] | (RefSeq) Zep1-1; zeaxanthin epoxidase	Carotenoid biosynthesis (ko00906)	[CR]	Energy production and conversion;; General function prediction only	FAD binding domain	Monooxygenase 2 OS=Arabidopsis thaliana OX=3702 GN=MO2 PE=2 SV=1	CH	Energy production and conversion;; Coenzyme transport and metabolism	PREDICTED: FAD-dependent urate hydroxylase-like isoform X3 [Solanum tuberosum]
gene.Soltu.DM.08G025160.1	191	143	151	577	487	514	351	475	367	3.91779	2.60973	2.88303	10.5538	10.1017	9.6159	6.68646	8.99261	7.82704	1.05407e-13	1.43117	up	[C]	Energy production and conversion	Molecular Function: L-lactate dehydrogenase activity (GO:0004459);; Cellular Component: cytoplasm (GO:0005737);; Biological Process: carbohydrate metabolic process (GO:0005975);; Biological Process: carboxylic acid metabolic process (GO:0019752);;	K00016|6.8e-193|sot:102604318|K00016 L-lactate dehydrogenase [EC:1.1.1.27] | (RefSeq) L-lactate dehydrogenase B	Glycolysis / Gluconeogenesis (ko00010);; Cysteine and methionine metabolism (ko00270);; Pyruvate metabolism (ko00620);; Propanoate metabolism (ko00640)	[C]	Energy production and conversion	lactate/malate dehydrogenase, NAD binding domain	L-lactate dehydrogenase B (Fragment) OS=Hordeum vulgare OX=4513 PE=1 SV=1	C	Energy production and conversion	PREDICTED: L-lactate dehydrogenase B [Solanum tuberosum]
gene.Soltu.DM.07G019210.1	81	83	44	32	26	40	8	19	10	1.50017	1.36421	0.760784	0.514611	0.475094	0.671794	0.13271	0.321226	0.190113	0.00625635	-1.71789	down	--	--	Molecular Function: DNA binding (GO:0003677);; Cellular Component: nucleus (GO:0005634);;	--	--	--	--	B3 DNA binding domain	B3 domain-containing transcription factor VRN1 OS=Arabidopsis thaliana OX=3702 GN=VRN1 PE=1 SV=1	K	Transcription	PREDICTED: B3 domain-containing transcription factor VRN1-like [Solanum tuberosum]
gene.Soltu.DM.07G004240.1	8	6	21	106	102	116	534	572	449	0.109391	0.064754	0.263294	1.31253	1.43559	1.46936	6.93456	7.37515	6.53356	2.8082e-09	4.70769	up	[T]	Signal transduction mechanisms	Molecular Function: acid phosphatase activity (GO:0003993);; Molecular Function: metal ion binding (GO:0046872);;	K22390|0.0e+00|sot:102605927|K22390 acid phosphatase type 7 | (RefSeq) probable inactive purple acid phosphatase 27	--	[G]	Carbohydrate transport and metabolism	Fn3-like domain from Purple Acid Phosphatase	Probable inactive purple acid phosphatase 27 OS=Arabidopsis thaliana OX=3702 GN=PAP27 PE=2 SV=1	S	Function unknown	PREDICTED: probable inactive purple acid phosphatase 27 [Solanum tuberosum]
gene.Soltu.DM.05G002670.1	483	544	553	149	129	241	285	237	238	8.61497	8.61936	9.18578	2.353	2.31871	3.91641	4.71876	3.88094	4.41643	1.17146e-05	-1.35725	down	--	--	Molecular Function: DNA binding (GO:0003677);; Cellular Component: nucleus (GO:0005634);;	K14491|3.5e-12|ghi:107906918|K14491 two-component response regulator ARR-B family | (RefSeq) two-component response regulator ORR24-like	Plant hormone signal transduction (ko04075)	--	--	Myb-like DNA-binding domain	Transcription factor HHO2 OS=Arabidopsis thaliana OX=3702 GN=HHO2 PE=1 SV=1	K	Transcription	PREDICTED: uncharacterized protein LOC102595401 [Solanum tuberosum]
gene.Soltu.DM.05G000760.1	0	0	0	34	156	241	55	159	45	0	0	0	0.50741	2.70183	3.75908	0.874388	2.51103	0.790858	7.18181e-10	9.2039	up	--	--	Cellular Component: integral component of membrane (GO:0016021);; Molecular Function: transmembrane transporter activity (GO:0022857);; Biological Process: nitrogen compound transport (GO:0071705);;	--	--	--	--	Ureide permease	Ureide permease 1 OS=Arabidopsis thaliana OX=3702 GN=UPS1 PE=1 SV=1	S	Function unknown	PREDICTED: ureide permease 1 isoform X1 [Solanum tuberosum]
gene.Soltu.DM.12G020420.1	11	14	4	86	79	92	89	143	85	0.213222	0.236238	0.069844	1.54503	1.61019	1.68974	1.66044	2.64697	1.774	1.07229e-14	3.25013	up	--	--	Molecular Function: protein binding (GO:0005515);;	--	--	[R]	General function prediction only	Leucine rich repeat	Plant intracellular Ras-group-related LRR protein 6 OS=Arabidopsis thaliana OX=3702 GN=PIRL6 PE=2 SV=1	S	Function unknown	PREDICTED: plant intracellular Ras-group-related LRR protein 6-like [Solanum tuberosum]
gene.Soltu.DM.01G031220.3	1	0	0	69	50	28	60	44	24	0.009325	0	0	0.927171	0.762506	0.37692	0.838577	0.61617	0.376259	1.03493e-06	6.92277	up	[I]	Lipid transport and metabolism	--	--	--	--	--	--	--	S	Function unknown	PREDICTED: uncharacterized protein LOC102588790 isoform X1 [Solanum tuberosum]
gene.Soltu.DM.08G020450.1	547	579	591	4179	3506	3799	3085	3857	2898	6.72837	6.32265	6.76705	45.7357	43.5034	42.5382	35.1661	43.6574	37.028	2.22582e-198	2.56297	up	[E]	Amino acid transport and metabolism	Molecular Function: urea transmembrane transporter activity (GO:0015204);; Cellular Component: integral component of membrane (GO:0016021);;	K20989|0.0e+00|sot:102589439|K20989 urea-proton symporter | (RefSeq) urea-proton symporter DUR3-like	--	[E]	Amino acid transport and metabolism	Sodium:solute symporter family	Urea-proton symporter DUR3 OS=Arabidopsis thaliana OX=3702 GN=DUR3 PE=1 SV=1	E	Amino acid transport and metabolism	PREDICTED: LOW QUALITY PROTEIN: urea-proton symporter DUR3-like [Solanum tuberosum]
gene.Soltu.DM.06G019070.1	303	312	273	85	90	122	160	217	155	17.0198	15.5555	14.2686	4.23888	5.10519	6.21774	8.30656	11.2175	9.03943	0.00404066	-1.15012	down	[QV]	Secondary metabolites biosynthesis, transport and catabolism;; Defense mechanisms	Molecular Function: monooxygenase activity (GO:0004497);; Molecular Function: iron ion binding (GO:0005506);; Molecular Function: oxidoreductase activity, acting on paired donors, with incorporation or reduction of molecular oxygen (GO:0016705);; Molecular Function: heme binding (GO:0020037);;	K15805|4.0e-59|nau:109237630|K15805 5-epiaristolochene 1,3-dihydroxylase [EC:1.14.14.149] | (RefSeq) 5-epiaristolochene 1,3-dihydroxylase	Sesquiterpenoid and triterpenoid biosynthesis (ko00909)	[Q]	Secondary metabolites biosynthesis, transport and catabolism	Cytochrome P450	Cytochrome P450 71D7 OS=Solanum chacoense OX=4108 GN=CYP71D7 PE=3 SV=1	Q	Secondary metabolites biosynthesis, transport and catabolism	PREDICTED: cytochrome P450 71D7-like [Solanum tuberosum]
gene.Soltu.DM.09G001600.1	26	28	26	62	76	95	70	96	113	0.320854	0.314533	0.308308	0.694807	0.978973	1.09446	0.822851	1.12636	1.49365	9.835e-06	1.63029	up	[T]	Signal transduction mechanisms	Molecular Function: protein serine/threonine kinase activity (GO:0004674);; Molecular Function: ATP binding (GO:0005524);; Cellular Component: integral component of membrane (GO:0016021);; Biological Process: recognition of pollen (GO:0048544);;	K13420|1.7e-61|mesc:110601988|K13420 LRR receptor-like serine/threonine-protein kinase FLS2 [EC:2.7.11.1] | (RefSeq) LRR receptor-like serine/threonine-protein kinase FLS2	MAPK signaling pathway - plant (ko04016);; Plant-pathogen interaction (ko04626)	--	--	Protein kinase domain	Putative receptor protein kinase ZmPK1 OS=Zea mays OX=4577 GN=PK1 PE=2 SV=2	T	Signal transduction mechanisms	PREDICTED: putative receptor protein kinase ZmPK1 [Solanum tuberosum]
gene.Soltu.DM.04G033210.1	170	241	205	620	488	480	814	848	755	4.35671	5.48541	4.90266	14.1636	12.6356	11.2199	19.3647	20.0326	20.1276	9.93196e-10	1.6588	up	[E]	Amino acid transport and metabolism	Molecular Function: hydrolase activity (GO:0016787);;	K13051|7.0e-184|sot:102584425|K13051 L-asparaginase / beta-aspartyl-peptidase [EC:3.5.1.1 3.4.19.5] | (RefSeq) probable isoaspartyl peptidase/L-asparaginase 2	Alanine, aspartate and glutamate metabolism (ko00250);; Cyanoamino acid metabolism (ko00460)	[E]	Amino acid transport and metabolism	Asparaginase	Probable isoaspartyl peptidase/L-asparaginase 2 OS=Arabidopsis thaliana OX=3702 GN=At3g16150 PE=2 SV=2	E	Amino acid transport and metabolism	PREDICTED: probable isoaspartyl peptidase/L-asparaginase 2 [Solanum tuberosum]
gene.Soltu.DM.06G032540.1	76	171	130	29	31	12	28	58	11	0.57025	1.14857	0.917223	0.195986	0.232861	0.077894	0.196672	0.403657	0.083783	0.000238589	-2.20938	down	[T]	Signal transduction mechanisms	Molecular Function: solute:proton antiporter activity (GO:0015299);; Cellular Component: integral component of membrane (GO:0016021);;	K05909|0.0e+00|sot:102597748|K05909 laccase [EC:1.10.3.2] | (RefSeq) laccase-3-like	--	[Q]	Secondary metabolites biosynthesis, transport and catabolism	Multicopper oxidase	Laccase-3 OS=Arabidopsis thaliana OX=3702 GN=LAC3 PE=2 SV=2	P	Inorganic ion transport and metabolism	Laccase-3 [Capsicum annuum]
gene.Soltu.DM.02G016310.1	68	102	118	313	253	293	275	248	258	1.43372	1.92055	2.33238	5.90675	5.41813	5.67085	5.41492	4.83457	5.68389	2.89085e-16	1.44939	up	[O]	Posttranslational modification, protein turnover, chaperones	Molecular Function: cysteine-type peptidase activity (GO:0008234);;	K13441|1.9e-94|sot:102595400|K13441 cysteine protease | (RefSeq) RCR3; fruit bromelain-like	Plant-pathogen interaction (ko04626)	[O]	Posttranslational modification, protein turnover, chaperones	Papain family cysteine protease	Senescence-specific cysteine protease SAG12 OS=Arabidopsis thaliana OX=3702 GN=SAG12 PE=1 SV=1	O	Posttranslational modification, protein turnover, chaperones	PREDICTED: zingipain-2-like [Solanum tuberosum]
gene.Soltu.DM.03G015500.1	972	1146	1017	5411	4663	5112	2998	3704	3061	34.3616	35.9815	33.4676	170.304	166.377	164.593	98.2926	120.55	112.484	1.74639e-29	1.91739	up	--	--	Molecular Function: enzyme inhibitor activity (GO:0004857);;	K01051|1.5e-14|hbr:110634660|K01051 pectinesterase [EC:3.1.1.11] | (RefSeq) pectinesterase-like	Pentose and glucuronate interconversions (ko00040)	--	--	Plant invertase/pectin methylesterase inhibitor	21 kDa protein OS=Daucus carota OX=4039 PE=2 SV=1	S	Function unknown	PREDICTED: 21 kDa protein-like isoform X1 [Solanum tuberosum]
gene.Soltu.DM.06G022630.4	184	216	705	24	21	113	35	84	122	2.74969	2.86019	9.82554	0.31645	0.307542	1.53496	0.484101	1.14663	1.88845	0.00189614	-2.5161	down	--	--	Molecular Function: metal ion binding (GO:0046872);;	K12309|8.4e-104|lja:Lj3g3v0323160.1|K12309 beta-galactosidase [EC:3.2.1.23] | (RefSeq) Lj3g3v0323160.1; -	Galactose metabolism (ko00052);; Other glycan degradation (ko00511);; Glycosaminoglycan degradation (ko00531);; Sphingolipid metabolism (ko00600);; Glycosphingolipid biosynthesis - ganglio series (ko00604)	[R]	General function prediction only	Zinc-finger double-stranded RNA-binding	Protein indeterminate-domain 11 OS=Arabidopsis thaliana OX=3702 GN=IDD11 PE=2 SV=1	S	Function unknown	PREDICTED: zinc finger protein NUTCRACKER-like isoform X3 [Solanum tuberosum]
gene.Soltu.DM.05G005800.1	22	23	15	52	30	48	45	52	37	1.34552	1.25646	0.859771	2.8241	1.83501	2.68046	2.52591	2.95121	2.36009	0.0059395	1.06808	up	--	--	Biological Process: defense response (GO:0006952);; Molecular Function: ADP binding (GO:0043531);;	--	--	--	--	Late blight resistance protein R1	Late blight resistance protein R1-A OS=Solanum demissum OX=50514 GN=R1A PE=3 SV=1	S	Function unknown	putative disease resistance protein R1 [Solanum stoloniferum]
gene.Soltu.DM.11G016790.1	254	308	230	1117	950	1059	575	543	506	7.78111	8.37448	6.56517	30.5044	29.3889	29.5729	16.346	15.3339	16.1199	1.40642e-07	1.50575	up	--	--	Cellular Component: integral component of membrane (GO:0016021);;	K14297|2.9e-08|zma:103628666|K14297 nuclear pore complex protein Nup98-Nup96 | (RefSeq) nuclear pore complex protein NUP96	RNA transport (ko03013)	--	--	Thaumatin family	Osmotin-like protein OSML13 OS=Solanum commersonii OX=4109 PE=2 SV=1	S	Function unknown	PREDICTED: osmotin-like protein OSML13 [Solanum tuberosum]
gene.Soltu.DM.04G024930.1	100	119	81	31	25	22	57	51	51	3.13115	3.30904	2.36863	0.859644	0.776628	0.602558	1.65011	1.47101	1.65945	0.00549556	-1.37757	down	--	--	Molecular Function: calcium ion binding (GO:0005509);;	K13448|1.9e-86|sot:102592778|K13448 calcium-binding protein CML | (RefSeq) probable calcium-binding protein CML44	Plant-pathogen interaction (ko04626)	[T]	Signal transduction mechanisms	EF hand	Probable calcium-binding protein CML44 OS=Arabidopsis thaliana OX=3702 GN=CML44 PE=2 SV=2	DTZ	Cell cycle control, cell division, chromosome partitioning;; Signal transduction mechanisms;; Cytoskeleton	PREDICTED: probable calcium-binding protein CML44 [Solanum tuberosum]
Solanum_tuberosum_newGene_3149	0	6	3	169	91	108	74	57	48	0	0.362595	0.158641	10.6597	6.51453	6.94405	4.82349	3.70683	3.50233	7.45004e-12	4.85519	up	--	--	--	--	--	--	--	Plant transposase (Ptta/En/Spm family)	--	--	--	PREDICTED: uncharacterized protein LOC102588207 [Solanum tuberosum]
gene.Soltu.DM.09G009490.1	122	215	240	705	509	567	276	408	354	2.06358	3.22153	3.77863	10.6132	8.68617	8.73747	4.32557	6.34756	6.21715	0.000254732	1.21696	up	--	--	Molecular Function: transcription factor activity, sequence-specific DNA binding (GO:0003700);; Cellular Component: nucleus (GO:0005634);; Molecular Function: sequence-specific DNA binding (GO:0043565);;	K13424|4.1e-287|sot:102588093|K13424 WRKY transcription factor 33 | (RefSeq) StWRKY9; probable WRKY transcription factor 26	MAPK signaling pathway - plant (ko04016);; Plant-pathogen interaction (ko04626)	--	--	WRKY DNA -binding domain	WRKY transcription factor WRKY24 OS=Oryza sativa subsp. japonica OX=39947 GN=WRKY24 PE=2 SV=1	K	Transcription	PREDICTED: probable WRKY transcription factor 26 [Solanum tuberosum]
gene.Soltu.DM.01G045040.1	109	277	205	20	34	38	45	43	29	2.75068	6.21999	4.82844	0.428936	0.862795	0.868546	1.03782	0.984848	0.754612	2.48039e-11	-2.53276	down	--	--	--	--	--	--	--	--	--	S	Function unknown	PREDICTED: fibronectin-binding protein A-like [Solanum tuberosum]
gene.Soltu.DM.02G019250.2	92	72	98	178	135	155	199	225	234	1.04572	0.726693	1.03792	1.79826	1.55133	1.60382	2.10015	2.35476	2.75926	0.00164401	1.04346	up	[M]	Cell wall/membrane/envelope biogenesis	Molecular Function: protein serine/threonine kinase activity (GO:0004674);; Molecular Function: ATP binding (GO:0005524);; Cellular Component: integral component of membrane (GO:0016021);; Biological Process: recognition of pollen (GO:0048544);;	K24104|4.9e-77|thj:104799061|K24104 GPN-loop GTPase | (RefSeq) LOW QUALITY PROTEIN: uncharacterized protein LOC104799061	--	--	--	Protein tyrosine and serine/threonine kinase	Receptor-like serine/threonine-protein kinase SD1-8 OS=Arabidopsis thaliana OX=3702 GN=SD18 PE=1 SV=1	T	Signal transduction mechanisms	receptor-like serine/threonine-protein kinase SD1-8 isoform X1 [Solanum lycopersicum]
gene.Soltu.DM.05G020900.1	35	55	30	140	132	112	294	284	248	1.05659	1.49266	0.855111	3.86	4.115	3.14301	8.43764	8.09774	7.96526	1.20244e-06	2.30913	up	--	--	Molecular Function: DNA binding (GO:0003677);; Molecular Function: transcription factor activity, sequence-specific DNA binding (GO:0003700);; Cellular Component: nucleus (GO:0005634);;	K14516|9.6e-100|sot:102594619|K14516 ethylene-responsive transcription factor 1 | (RefSeq) ethylene-responsive transcription factor 1B-like	MAPK signaling pathway - plant (ko04016);; Plant hormone signal transduction (ko04075)	--	--	AP2 domain	Ethylene-responsive transcription factor 1B OS=Arabidopsis thaliana OX=3702 GN=ERF1B PE=1 SV=2	--	--	PREDICTED: ethylene-responsive transcription factor 1B-like [Solanum tuberosum]
gene.Soltu.DM.07G018670.2	0	0	0	738	0	857	639	729	529	0	0	0	12.9778	0	15.417	11.697	13.2497	10.8594	1.05212e-06	11.5418	up	[G]	Carbohydrate transport and metabolism	Biological Process: carbohydrate metabolic process (GO:0005975);; Biological Process: pentose-phosphate shunt (GO:0006098);; Molecular Function: 6-phosphogluconolactonase activity (GO:0017057);;	K01057|2.9e-182|sot:102598227|K01057 6-phosphogluconolactonase [EC:3.1.1.31] | (RefSeq) probable 6-phosphogluconolactonase 4, chloroplastic	Pentose phosphate pathway (ko00030);; Carbon metabolism (ko01200)	[G]	Carbohydrate transport and metabolism	Glucosamine-6-phosphate isomerases/6-phosphogluconolactonase	Probable 6-phosphogluconolactonase 4, chloroplastic OS=Oryza sativa subsp. indica OX=39946 GN=OsI_031067 PE=3 SV=2	G	Carbohydrate transport and metabolism	PREDICTED: probable 6-phosphogluconolactonase 4, chloroplastic [Solanum tuberosum]
gene.Soltu.DM.10G023210.1	43	81	49	178	150	151	103	142	76	0.57976	0.974583	0.612491	2.16037	2.05859	1.87151	1.29446	1.77503	1.06453	0.000604148	1.1445	up	[T]	Signal transduction mechanisms	Molecular Function: protein kinase activity (GO:0004672);; Molecular Function: ATP binding (GO:0005524);; Cellular Component: integral component of membrane (GO:0016021);; Molecular Function: carbohydrate binding (GO:0030246);;	K01176|3.7e-70|sbi:8065370|K01176 alpha-amylase [EC:3.2.1.1] | (RefSeq) alpha-amylase isozyme 2A	Starch and sucrose metabolism (ko00500)	--	--	Legume lectin domain	L-type lectin-domain containing receptor kinase S.4 OS=Arabidopsis thaliana OX=3702 GN=LECRKS4 PE=2 SV=1	T	Signal transduction mechanisms	PREDICTED: L-type lectin-domain containing receptor kinase S.4-like [Solanum tuberosum]
gene.Soltu.DM.06G004140.2	55	54	51	114	52	179	228	206	137	0.875384	0.753367	0.747891	1.61684	0.823902	2.58821	3.37425	3.01265	2.27085	0.00568058	1.45043	up	[M]	Cell wall/membrane/envelope biogenesis	Molecular Function: protein kinase activity (GO:0004672);; Molecular Function: ATP binding (GO:0005524);;	K00924|1.5e-90|oeu:111377749|K00924 kinase [EC:2.7.1.-] | (RefSeq) probable serine/threonine-protein kinase PBL19 isoform X1	--	[T]	Signal transduction mechanisms	Protein kinase domain	Serine/threonine-protein kinase PCRK1 OS=Arabidopsis thaliana OX=3702 GN=PCRK1 PE=1 SV=1	T	Signal transduction mechanisms	serine/threonine-protein kinase PCRK1 [Solanum lycopersicum]
gene.Soltu.DM.02G017810.3	549	675	729	1601	1261	1460	1658	2010	1727	8.53129	9.31466	10.5463	22.1492	19.772	20.6663	23.8909	28.76	27.886	3.71495e-12	1.25994	up	[F]	Nucleotide transport and metabolism	Biological Process: allantoin catabolic process (GO:0000256);; Molecular Function: allantoinase activity (GO:0004038);; Cellular Component: endoplasmic reticulum (GO:0005783);; Biological Process: purine nucleobase catabolic process (GO:0006145);; Biological Process: cellular response to nitrogen starvation (GO:0006995);; Molecular Function: zinc ion binding (GO:0008270);; Biological Process: ure…	K01466|1.7e-293|sot:102596978|K01466 allantoinase [EC:3.5.2.5] | (RefSeq) allantoinase	Purine metabolism (ko00230)	[F]	Nucleotide transport and metabolism	Amidohydrolase family	Allantoinase OS=Arabidopsis thaliana OX=3702 GN=ALN PE=1 SV=1	F	Nucleotide transport and metabolism	PREDICTED: allantoinase [Solanum tuberosum]
gene.Soltu.DM.05G018820.1	151	126	152	8	29	26	29	26	30	3.76275	2.78614	3.50607	0.177414	0.718939	0.576583	0.659164	0.581595	0.755867	2.44856e-09	-2.58638	down	--	--	Molecular Function: peroxidase activity (GO:0004601);; Cellular Component: extracellular region (GO:0005576);; Biological Process: response to oxidative stress (GO:0006979);; Molecular Function: heme binding (GO:0020037);; Biological Process: hydrogen peroxide catabolic process (GO:0042744);; Molecular Function: metal ion binding (GO:0046872);;	K00430|2.3e-187|sot:102590030|K00430 peroxidase [EC:1.11.1.7] | (RefSeq) peroxidase 3-like	Phenylpropanoid biosynthesis (ko00940)	--	--	Peroxidase	Peroxidase 3 OS=Arabidopsis thaliana OX=3702 GN=PER3 PE=2 SV=1	G	Carbohydrate transport and metabolism	PREDICTED: peroxidase 3-like [Solanum tuberosum]
gene.Soltu.DM.03G029000.1	295	471	248	788	785	776	867	914	664	6.66861	9.45802	5.22831	15.8752	17.9181	15.9894	18.1926	19.0427	15.6084	2.04966e-10	1.19333	up	--	--	Molecular Function: intramolecular transferase activity (GO:0016866);; Biological Process: plant-type cell wall organization or biogenesis (GO:0071669);;	K13379|7.7e-224|sot:102584052|K13379 reversibly glycosylated polypeptide / UDP-arabinopyranose mutase [EC:2.4.1.- 5.4.99.30] | (RefSeq) alpha-1,4-glucan-protein synthase [UDP-forming] 2-like	Amino sugar and nucleotide sugar metabolism (ko00520)	--	--	Reversibly glycosylated polypeptide	Probable UDP-arabinopyranose mutase 2 OS=Solanum tuberosum OX=4113 GN=UPTG2 PE=1 SV=1	O	Posttranslational modification, protein turnover, chaperones	PREDICTED: alpha-1,4-glucan-protein synthase [UDP-forming] 2-like [Solanum tuberosum]
Solanum_tuberosum_newGene_5736	158	182	160	459	380	521	389	420	325	1.22567	1.10109	0.953681	3.7015	3.23679	4.63784	2.68256	2.63216	2.4502	1.14958e-22	1.24845	up	--	--	Molecular Function: nucleic acid binding (GO:0003676);; Biological Process: DNA integration (GO:0015074);;	K12396|4.05e-12|oeu:111400700|K12396 AP-3 complex subunit delta | (RefSeq) LOW QUALITY PROTEIN: uncharacterized protein LOC111400700	--	[R]	General function prediction only	Integrase zinc binding domain	--	L	Replication, recombination and repair	Retrotransposon gag protein [Solanum demissum]
gene.Soltu.DM.08G020440.1	36	49	56	129	63	109	245	316	270	0.865225	1.05325	1.27707	2.8032	1.53863	2.42493	5.5719	7.13413	6.88146	0.00152955	1.97201	up	[H]	Coenzyme transport and metabolism	Molecular Function: alternative oxidase activity (GO:0009916);; Cellular Component: integral component of membrane (GO:0016021);; Molecular Function: metal ion binding (GO:0046872);; Cellular Component: respiratory chain (GO:0070469);; Molecular Function: ubiquinol:oxygen oxidoreductase activity (GO:0102721);;	K17893|5.8e-191|sot:102589114|K17893 ubiquinol oxidase [EC:1.10.3.11] | (RefSeq) ubiquinol oxidase 2, mitochondrial-like	--	--	--	Alternative oxidase	Ubiquinol oxidase 3, mitochondrial OS=Arabidopsis thaliana OX=3702 GN=AOX3 PE=1 SV=2	S	Function unknown	PREDICTED: ubiquinol oxidase 2, mitochondrial-like [Solanum tuberosum]
gene.Soltu.DM.07G004510.1	8191	8887	7895	3709	3591	3209	1508	1557	1833	352.604	339.618	316.394	142.033	155.907	125.709	60.1356	61.6383	81.9673	1.11003e-08	-1.77559	down	--	--	Biological Process: defense response (GO:0006952);;	--	--	--	--	Pathogenesis-related protein Bet v 1 family	Kirola OS=Actinidia deliciosa OX=3627 PE=1 SV=1	--	--	PREDICTED: kirola-like [Solanum tuberosum]
gene.Soltu.DM.12G002200.1	37	45	34	80	112	87	176	139	132	0.370408	0.402088	0.320117	0.719097	1.15349	0.801156	1.66109	1.30085	1.39232	5.96597e-05	1.60671	up	--	--	Molecular Function: structural constituent of cell wall (GO:0005199);; Biological Process: plant-type cell wall organization (GO:0009664);;	--	--	--	--	Pollen protein Ole e 1 like	--	S	Function unknown	PREDICTED: extensin-2-like [Solanum tuberosum]
gene.Soltu.DM.09G024240.1	33	52	24	109	109	130	119	173	156	0.396281	0.546845	0.268125	1.15991	1.31244	1.41785	1.31966	1.90904	1.94205	7.87381e-08	1.82941	up	[M]	Cell wall/membrane/envelope biogenesis	Molecular Function: protein serine/threonine kinase activity (GO:0004674);; Molecular Function: ATP binding (GO:0005524);; Biological Process: recognition of pollen (GO:0048544);;	K13420|1.9e-54|mesc:110601988|K13420 LRR receptor-like serine/threonine-protein kinase FLS2 [EC:2.7.11.1] | (RefSeq) LRR receptor-like serine/threonine-protein kinase FLS2	MAPK signaling pathway - plant (ko04016);; Plant-pathogen interaction (ko04626)	--	--	Protein kinase domain	G-type lectin S-receptor-like serine/threonine-protein kinase LECRK4 OS=Oryza sativa subsp. indica OX=39946 GN=LECRK4 PE=3 SV=1	T	Signal transduction mechanisms	PREDICTED: G-type lectin S-receptor-like serine/threonine-protein kinase RLK1 [Solanum tuberosum]
gene.Soltu.DM.08G028710.1	368	447	452	1342	1104	1221	543	599	590	16.0088	17.2895	18.3041	52.02	48.4981	48.4241	21.901	23.9989	26.6672	0.00433823	1.00825	up	--	--	--	--	--	--	--	--	--	S	Function unknown	PREDICTED: uncharacterized protein LOC102598350 [Solanum tuberosum]
gene.Soltu.DM.01G034410.1	68771	69787	69135	40393	33116	37531	34224	37165	30278	520.023	468.503	486.669	271.756	252.607	258.325	239.856	258.572	237.827	4.69222e-93	-1.03658	down	--	--	Molecular Function: chaperone binding (GO:0051087);;	--	--	--	--	BAG domain	BAG family molecular chaperone regulator 6 OS=Arabidopsis thaliana OX=3702 GN=BAG6 PE=1 SV=1	S	Function unknown	PREDICTED: BAG family molecular chaperone regulator 6 [Solanum tuberosum]
gene.Soltu.DM.04G032040.1	119	97	131	345	356	320	531	632	610	0.882421	0.637105	0.900129	2.27822	2.66129	2.1588	3.65536	4.31909	4.69953	2.70104e-08	1.95937	up	[T]	Signal transduction mechanisms	Molecular Function: protein serine/threonine kinase activity (GO:0004674);; Molecular Function: ATP binding (GO:0005524);; Cellular Component: integral component of membrane (GO:0016021);; Biological Process: recognition of pollen (GO:0048544);;	K24104|3.0e-74|thj:104799061|K24104 GPN-loop GTPase | (RefSeq) LOW QUALITY PROTEIN: uncharacterized protein LOC104799061	--	--	--	Protein tyrosine and serine/threonine kinase	G-type lectin S-receptor-like serine/threonine-protein kinase At4g27290 OS=Arabidopsis thaliana OX=3702 GN=At4g27290 PE=3 SV=4	--	--	uncharacterized protein LOC104084949 [Nicotiana tomentosiformis]
gene.Soltu.DM.01G032010.1	74	88	77	47	31	47	35	47	36	2.40225	2.56228	2.3336	1.36533	0.994008	1.37967	1.05508	1.41796	1.20246	2.66136e-05	-1.04278	down	--	--	Cellular Component: integral component of membrane (GO:0016021);; Biological Process: vesicle-mediated transport (GO:0016192);;	K20368|1.6e-70|sot:102579679|K20368 protein cornichon | (RefSeq) protein cornichon homolog 4-like	--	[OUT]	Posttranslational modification, protein turnover, chaperones;; Intracellular trafficking, secretion, and vesicular transport;; Signal transduction mechanisms	Cornichon protein	Protein cornichon homolog 4 OS=Arabidopsis thaliana OX=3702 GN=At1g12390 PE=1 SV=1	U	Intracellular trafficking, secretion, and vesicular transport	PREDICTED: protein cornichon homolog 4-like isoform X1 [Solanum tuberosum]
gene.Soltu.DM.08G024010.1	40	61	40	236	147	139	109	136	131	1.4059	1.89788	1.29528	7.42468	5.24383	4.48413	3.55977	4.42413	4.81932	5.73518e-08	1.60691	up	--	--	Cellular Component: integral component of membrane (GO:0016021);;	--	--	--	--	--	--	S	Function unknown	PREDICTED: uncharacterized protein LOC102595591 isoform X2 [Solanum tuberosum]
gene.Soltu.DM.07G004520.1	263	262	539	141	124	175	107	149	180	14.5687	12.8982	27.8266	6.93589	6.91503	8.82515	5.49054	7.59619	10.3586	0.000167482	-1.34489	down	--	--	Biological Process: defense response (GO:0006952);;	--	--	--	--	Pathogenesis-related protein Bet v 1 family	Kirola OS=Actinidia deliciosa OX=3627 PE=1 SV=1	--	--	PREDICTED: kirola-like [Solanum tuberosum]
gene.Soltu.DM.09G020480.1	74	51	62	19	5	15	23	19	24	2.06186	1.25476	1.61209	0.463925	0.136381	0.358401	0.584758	0.465808	0.67525	0.000522965	-1.90112	down	[Q]	Secondary metabolites biosynthesis, transport and catabolism	Biological Process: fatty acid biosynthetic process (GO:0006633);; Cellular Component: integral component of membrane (GO:0016021);; Molecular Function: transferase activity, transferring acyl groups other than amino-acyl groups (GO:0016747);;	K15397|4.1e-212|sot:102605420|K15397 3-ketoacyl-CoA synthase [EC:2.3.1.199] | (RefSeq) 3-ketoacyl-CoA synthase 2-like	Fatty acid elongation (ko00062);; Plant-pathogen interaction (ko04626)	--	--	FAE1/Type III polyketide synthase-like protein	3-ketoacyl-CoA synthase 11 OS=Arabidopsis thaliana OX=3702 GN=KCS11 PE=1 SV=1	--	--	PREDICTED: 3-ketoacyl-CoA synthase 2-like [Solanum tuberosum]
gene.Soltu.DM.08G019330.1	30	51	43	8	7	2	8	6	6	0.514152	0.781688	0.696824	0.116746	0.109934	0.022188	0.122389	0.086719	0.097313	8.69087e-08	-2.7922	down	--	--	Molecular Function: catechol oxidase activity (GO:0004097);; Biological Process: pigment biosynthetic process (GO:0046148);; Molecular Function: metal ion binding (GO:0046872);;	K00422|0.0e+00|sly:101258774|K00422 polyphenol oxidase [EC:1.10.3.1] | (RefSeq) PPO; polyphenol oxidase B, chloroplastic	Tyrosine metabolism (ko00350);; Isoquinoline alkaloid biosynthesis (ko00950)	--	--	Protein of unknown function (DUF_B2219)	Polyphenol oxidase B, chloroplastic OS=Solanum lycopersicum OX=4081 PE=3 SV=1	--	--	polyphenol oxidase [Solanum tuberosum]
gene.Soltu.DM.03G035150.1	5502	6255	5927	21942	19425	20210	15479	17399	14988	164.715	166.233	165.179	584.45	586.634	550.737	429.511	479.253	466.106	1.46933e-69	1.56011	up	[G]	Carbohydrate transport and metabolism	Molecular Function: channel activity (GO:0015267);; Cellular Component: integral component of membrane (GO:0016021);;	K09873|1.7e-134|sot:102596615|K09873 aquaporin TIP | (RefSeq) aquaporin TIP2-1-like	--	[G]	Carbohydrate transport and metabolism	Major intrinsic protein	Aquaporin TIP2-1 OS=Arabidopsis thaliana OX=3702 GN=TIP2-1 PE=1 SV=2	G	Carbohydrate transport and metabolism	PREDICTED: aquaporin TIP2-1-like [Solanum tuberosum]
gene.Soltu.DM.06G029980.1	82	140	111	237	184	202	307	278	257	2.19435	3.34007	2.77409	5.66507	5.00566	4.95384	7.65242	6.88591	7.17721	7.90512e-05	1.0949	up	--	--	--	--	--	--	--	--	--	S	Function unknown	hypothetical protein EJD97_021526 [Solanum chilense]
gene.Soltu.DM.02G017810.4	455	516	446	1438	1106	1412	1282	1216	1324	6.66034	6.69581	6.07895	18.7339	16.3334	18.8135	17.3904	16.3805	20.1387	3.79379e-39	1.39571	up	[F]	Nucleotide transport and metabolism	Biological Process: allantoin catabolic process (GO:0000256);; Molecular Function: allantoinase activity (GO:0004038);; Cellular Component: endoplasmic reticulum (GO:0005783);; Biological Process: purine nucleobase catabolic process (GO:0006145);; Biological Process: cellular response to nitrogen starvation (GO:0006995);; Molecular Function: zinc ion binding (GO:0008270);; Biological Process: ure…	K01466|2.6e-247|sot:102596978|K01466 allantoinase [EC:3.5.2.5] | (RefSeq) allantoinase	Purine metabolism (ko00230)	[F]	Nucleotide transport and metabolism	Amidohydrolase family	Allantoinase OS=Arabidopsis thaliana OX=3702 GN=ALN PE=1 SV=1	F	Nucleotide transport and metabolism	PREDICTED: allantoinase [Solanum tuberosum]
gene.Soltu.DM.12G009520.1	300	482	365	1379	1152	1187	1240	1197	1022	8.64573	12.3356	9.79215	35.3874	33.5018	31.1632	33.1468	31.7547	30.6036	5.76566e-47	1.58995	up	[IQR]	Lipid transport and metabolism;; Secondary metabolites biosynthesis, transport and catabolism;; General function prediction only	Molecular Function: oxidoreductase activity (GO:0016491);;	K00059|5.3e-28|sita:101776165|K00059 3-oxoacyl-[acyl-carrier protein] reductase [EC:1.1.1.100] | (RefSeq) 3-oxoacyl-[acyl-carrier-protein] reductase 4	Fatty acid biosynthesis (ko00061);; Biotin metabolism (ko00780);; Fatty acid metabolism (ko01212)	[R]	General function prediction only	short chain dehydrogenase	3-oxoacyl-[acyl-carrier-protein] reductase, chloroplastic OS=Cuphea lanceolata OX=3930 GN=CLKR27 PE=2 SV=1	S	Function unknown	PREDICTED: 3-oxoacyl-[acyl-carrier-protein] reductase FabG-like, partial [Solanum tuberosum]
gene.Soltu.DM.02G012460.1	7753	9223	8525	5042	3187	3800	3314	3067	2613	192.174	202.959	196.713	111.186	79.681	85.7373	76.135	69.9294	67.2795	1.46229e-22	-1.35451	down	--	--	Cellular Component: photosystem I reaction center (GO:0009538);; Biological Process: photosynthesis (GO:0015979);; Cellular Component: integral component of membrane (GO:0016021);;	K02694|8.8e-125|sot:102585620|K02694 photosystem I subunit III | (RefSeq) photosystem I reaction center subunit III, chloroplastic-like	Photosynthesis (ko00195)	--	--	Photosystem I reaction centre subunit III	Photosystem I reaction center subunit III, chloroplastic OS=Flaveria trinervia OX=4227 GN=PSAF PE=2 SV=1	S	Function unknown	PREDICTED: photosystem I reaction center subunit III, chloroplastic-like [Solanum tuberosum]
gene.Soltu.DM.04G032030.1	86	99	41	21	14	18	45	20	12	0.95738	0.970879	0.419399	0.200068	0.157162	0.178919	0.464346	0.198924	0.132475	0.00175121	-1.85764	down	[T]	Signal transduction mechanisms	Molecular Function: protein serine/threonine kinase activity (GO:0004674);; Molecular Function: ATP binding (GO:0005524);; Cellular Component: integral component of membrane (GO:0016021);; Biological Process: recognition of pollen (GO:0048544);;	K24104|1.0e-77|thj:104799061|K24104 GPN-loop GTPase | (RefSeq) LOW QUALITY PROTEIN: uncharacterized protein LOC104799061	--	--	--	Protein tyrosine and serine/threonine kinase	G-type lectin S-receptor-like serine/threonine-protein kinase At4g27290 OS=Arabidopsis thaliana OX=3702 GN=At4g27290 PE=3 SV=4	--	--	PREDICTED: G-type lectin S-receptor-like serine/threonine-protein kinase At4g27290 isoform X1 [Solanum tuberosum]
gene.Soltu.DM.05G006770.1	109	140	105	67	42	49	86	77	42	1.78557	2.05149	1.60913	0.978574	0.683942	0.72467	1.31372	1.15852	0.706477	0.00304505	-1.02649	down	--	--	Molecular Function: protein binding (GO:0005515);;	K13420|3.4e-09|csv:101215973|K13420 LRR receptor-like serine/threonine-protein kinase FLS2 [EC:2.7.11.1] | (RefSeq) LRR receptor-like serine/threonine-protein kinase FLS2	MAPK signaling pathway - plant (ko04016);; Plant-pathogen interaction (ko04626)	--	--	Leucine rich repeat	Receptor-like protein EIX2 OS=Solanum lycopersicum OX=4081 GN=EIX2 PE=1 SV=2	S	Function unknown	PREDICTED: LRR receptor-like serine/threonine-protein kinase GSO1 [Solanum tuberosum]
gene.Soltu.DM.02G021730.2	12	0	11	44	10	60	150	67	100	0.092502	0	0.076645	0.317329	0.082034	0.438959	1.1321	0.500984	0.846214	0.00603277	3.14166	up	[S]	Function unknown	Molecular Function: DNA binding (GO:0003677);; Molecular Function: DNA topoisomerase type I activity (GO:0003917);; Cellular Component: chromosome (GO:0005694);; Biological Process: DNA topological change (GO:0006265);;	K03168|6.5e-152|ghi:107943645|K03168 DNA topoisomerase I [EC:5.6.2.1] | (RefSeq) DNA topoisomerase 1-like	--	[L]	Replication, recombination and repair	DNA topoisomerase	--	L	Replication, recombination and repair	PREDICTED: LOW QUALITY PROTEIN: DNA topoisomerase 1-like [Solanum tuberosum]
gene.Soltu.DM.11G013630.1	2293	2516	2306	5617	4815	5526	9150	9225	8745	47.0874	45.8824	44.0889	102.654	99.7667	103.327	174.211	174.369	186.613	2.71859e-08	1.55369	up	[C]	Energy production and conversion	Molecular Function: FMN binding (GO:0010181);; Molecular Function: oxidoreductase activity (GO:0016491);;	K05894|3.2e-217|sot:102597899|K05894 12-oxophytodienoic acid reductase [EC:1.3.1.42] | (RefSeq) 12-oxophytodienoate reductase 1-like	alpha-Linolenic acid metabolism (ko00592)	[CR]	Energy production and conversion;; General function prediction only	NADH:flavin oxidoreductase / NADH oxidase family	12-oxophytodienoate reductase 1 OS=Arabidopsis thaliana OX=3702 GN=OPR1 PE=1 SV=2	C	Energy production and conversion	PREDICTED: 12-oxophytodienoate reductase 1-like [Solanum tuberosum]
gene.Soltu.DM.02G014120.1	45	65	42	342	298	319	91	132	130	1.06004	1.36821	0.925137	7.31182	7.22265	6.98677	2.01652	2.90625	3.22665	4.94038e-05	2.03049	up	--	--	Molecular Function: purine nucleoside transmembrane transporter activity (GO:0015211);; Cellular Component: integral component of membrane (GO:0016021);;	K07893|1.1e-18|ini:109192111|K07893 Ras-related protein Rab-6A | (RefSeq) ras-related protein RABH1b-like	--	--	--	Purine nucleobase transmembrane transport	Probable purine permease 10 OS=Arabidopsis thaliana OX=3702 GN=PUP10 PE=2 SV=2	--	--	probable purine permease 10 [Solanum lycopersicum]
gene.Soltu.DM.05G023690.1	39	28	33	65	94	100	48	101	59	2.60747	1.63073	2.05693	3.8217	6.32581	6.08393	2.97737	6.21013	4.04065	0.00617908	1.14429	up	--	--	Molecular Function: ATP binding (GO:0005524);; Cellular Component: integral component of membrane (GO:0016021);; Molecular Function: ATPase activity (GO:0016887);;	--	--	[Q]	Secondary metabolites biosynthesis, transport and catabolism	Plant PDR ABC transporter associated	Pleiotropic drug resistance protein 1 OS=Nicotiana tabacum OX=4097 GN=PDR1 PE=2 SV=1	V	Defense mechanisms	pleiotropic drug resistance protein 1-like isoform X2 [Solanum pennellii]
gene.Soltu.DM.11G008490.1	42	49	73	204	168	221	102	90	93	0.523796	0.548624	0.858079	2.30934	2.14445	2.55687	1.19964	1.05322	1.2224	0.00225271	1.33321	up	--		Molecular Function: protein serine/threonine kinase activity (GO:0004674);; Molecular Function: ATP binding (GO:0005524);; Cellular Component: integral component of membrane (GO:0016021);; Biological Process: recognition of pollen (GO:0048544);;	K13416|3.9e-55|bvg:104905771|K13416 brassinosteroid insensitive 1-associated receptor kinase 1 [EC:2.7.10.1 2.7.11.1] | (RefSeq) BRASSINOSTEROID INSENSITIVE 1-associated receptor kinase 1-like	MAPK signaling pathway - plant (ko04016);; Plant hormone signal transduction (ko04075);; Plant-pathogen interaction (ko04626)	--	--	Protein kinase domain	G-type lectin S-receptor-like serine/threonine-protein kinase LECRK3 OS=Oryza sativa subsp. indica OX=39946 GN=LECRK3 PE=3 SV=2	U	Intracellular trafficking, secretion, and vesicular transport	PREDICTED: G-type lectin S-receptor-like serine/threonine-protein kinase RLK1, partial [Solanum tuberosum]
Solanum_tuberosum_newGene_5978	46	59	41	17	7	4	0	16	6	1.11932	1.32285	1.01653	0.374933	0.145625	0.138096	0	0.288361	0.114665	0.0050713	-2.6275	down	--	--	--	--	--	--	--	DDE superfamily endonuclease	--	L	Replication, recombination and repair	PREDICTED: uncharacterized protein LOC107062739 [Solanum tuberosum]
gene.Soltu.DM.07G014000.1	915	1109	902	2701	2460	2599	1779	2007	1654	16.5359	17.8038	15.1799	43.4434	44.8695	42.7792	29.8064	33.3774	31.0667	9.49531e-15	1.10347	up	[P]	Inorganic ion transport and metabolism	Molecular Function: zinc ion transmembrane transporter activity (GO:0005385);; Cellular Component: integral component of membrane (GO:0016021);;	K14709|2.2e-180|sot:102599833|K14709 solute carrier family 39 (zinc transporter), member 1/2/3 | (RefSeq) zinc transporter 5-like	--	[P]	Inorganic ion transport and metabolism	ZIP Zinc transporter	Zinc transporter 5 OS=Arabidopsis thaliana OX=3702 GN=ZIP5 PE=2 SV=1	P	Inorganic ion transport and metabolism	PREDICTED: zinc transporter 5-like [Solanum tuberosum]
gene.Soltu.DM.05G003380.1	38	48	89	165	135	205	107	139	117	0.828938	0.918567	1.79944	3.19242	2.9551	4.07616	2.15758	2.7853	2.63987	0.000673273	1.23247	up	--	--	Cellular Component: integral component of membrane (GO:0016021);;	K09775|4.3e-10|dzi:111283728|K09775 uncharacterized protein | (RefSeq) uncharacterized protein LOC111283728 isoform X1	--	--	--	Core-2/I-Branching enzyme	Glycosyltransferase BC10 OS=Oryza sativa subsp. japonica OX=39947 GN=BC10 PE=1 SV=1	S	Function unknown	PREDICTED: uncharacterized protein LOC102583596 [Solanum tuberosum]
gene.Soltu.DM.02G014770.1	90	74	101	40	41	50	54	45	47	4.25111	3.10128	4.41806	1.65148	1.93278	2.14909	2.35815	1.95452	2.26626	0.00061244	-1.00386	down	--	--	--	--	--	--	--	Peptidase inhibitor I9	Subtilisin-like protease SBT5.6 OS=Arabidopsis thaliana OX=3702 GN=SBT5.6 PE=2 SV=1	--	--	PREDICTED: subtilisin-like protease SBT5.3 isoform X2 [Solanum tuberosum]
gene.Soltu.DM.10G019710.1	17	32	24	82	47	67	109	56	84	0.473986	0.790289	0.620976	2.06018	1.32469	1.71902	2.83578	1.43364	2.44381	0.000374852	1.56609	up	[E]	Amino acid transport and metabolism	--	K23978|4.4e-146|sot:102584408|K23978 isoamyl acetate esterase [EC:3.1.1.112] | (RefSeq) GDSL esterase/lipase CPRD49-like	--	[I]	Lipid transport and metabolism	GDSL-like Lipase/Acylhydrolase family	GDSL esterase/lipase CPRD49 OS=Arabidopsis thaliana OX=3702 GN=CPRD49 PE=2 SV=1	E	Amino acid transport and metabolism	PREDICTED: GDSL esterase/lipase CPRD49-like [Solanum tuberosum]
gene.Soltu.DM.01G007760.1	18	26	33	120	83	95	51	40	76	0.512396	0.663566	0.896267	3.17555	2.47835	2.56521	1.40391	1.07482	2.34905	0.00163073	1.52517	up	[T]	Signal transduction mechanisms	Molecular Function: calcium ion binding (GO:0005509);;	K13448|2.1e-85|sot:102594874|K13448 calcium-binding protein CML | (RefSeq) probable calcium-binding protein CML15	Plant-pathogen interaction (ko04626)	[T]	Signal transduction mechanisms	EF-hand domain pair	Probable calcium-binding protein CML16 OS=Arabidopsis thaliana OX=3702 GN=CML16 PE=2 SV=2	DTZ	Cell cycle control, cell division, chromosome partitioning;; Signal transduction mechanisms;; Cytoskeleton	PREDICTED: probable calcium-binding protein CML15 [Solanum tuberosum]
gene.Soltu.DM.12G009490.1	7	15	8	33	49	23	97	107	82	0.085251	0.180119	0.10437	0.41077	0.679871	0.290384	1.25365	1.373	1.1946	0.000218731	2.69252	up	[QV]	Secondary metabolites biosynthesis, transport and catabolism;; Defense mechanisms	Molecular Function: monooxygenase activity (GO:0004497);; Molecular Function: iron ion binding (GO:0005506);; Molecular Function: oxidoreductase activity, acting on paired donors, with incorporation or reduction of molecular oxygen (GO:0016705);; Molecular Function: heme binding (GO:0020037);;	K20562|8.7e-186|cann:107870189|K20562 biphenyl-4-hydroxylase | (RefSeq) cytochrome P450 CYP736A12-like	--	[Q]	Secondary metabolites biosynthesis, transport and catabolism	Cytochrome P450	Cytochrome P450 71AU50 OS=Prunus mume OX=102107 GN=CYP71AU50 PE=2 SV=1	Q	Secondary metabolites biosynthesis, transport and catabolism	PREDICTED: cytochrome P450 CYP736A12-like [Solanum tuberosum]
gene.Soltu.DM.03G008210.1	5	10	21	45	39	32	95	108	121	0.088588	0.151165	0.359286	0.740892	0.727371	0.523364	1.62877	1.8341	2.31279	0.000730966	2.59028	up	[QV]	Secondary metabolites biosynthesis, transport and catabolism;; Defense mechanisms	Molecular Function: monooxygenase activity (GO:0004497);; Molecular Function: iron ion binding (GO:0005506);; Molecular Function: oxidoreductase activity, acting on paired donors, with incorporation or reduction of molecular oxygen (GO:0016705);; Molecular Function: heme binding (GO:0020037);;	K15472|4.3e-117|nau:109237629|K15472 premnaspirodiene oxygenase [EC:1.14.14.151] | (RefSeq) premnaspirodiene oxygenase	Sesquiterpenoid and triterpenoid biosynthesis (ko00909)	[Q]	Secondary metabolites biosynthesis, transport and catabolism	Cytochrome P450	Premnaspirodiene oxygenase OS=Hyoscyamus muticus OX=35626 GN=CYP71D55 PE=1 SV=1	Q	Secondary metabolites biosynthesis, transport and catabolism	PREDICTED: premnaspirodiene oxygenase-like [Nicotiana sylvestris]
gene.Soltu.DM.03G016890.3	158	83	169	533	359	456	510	661	292	2.98688	1.38789	2.97487	9.00066	6.85973	7.86556	8.97368	11.5461	5.75092	3.51805e-07	1.67776	up	--	--	Molecular Function: ubiquitin-protein transferase activity (GO:0004842);; Biological Process: negative regulation of organ growth (GO:0046621);;	K19045|6.3e-134|sot:102583422|K19045 E3 ubiquitin-protein ligase BIG BROTHER and related proteins [EC:2.3.2.27] | (RefSeq) E3 ubiquitin ligase BIG BROTHER-like	--	[O]	Posttranslational modification, protein turnover, chaperones	Ring finger domain	E3 ubiquitin-protein ligase BIG BROTHER OS=Arabidopsis thaliana OX=3702 GN=BB PE=1 SV=1	O	Posttranslational modification, protein turnover, chaperones	PREDICTED: E3 ubiquitin ligase BIG BROTHER-like [Solanum tuberosum]
gene.Soltu.DM.07G027740.3	0	6	0	515	374	76	106	105	0	0	0.097697	0	8.66257	7.12121	1.30376	1.84473	1.81338	0	0.00492063	6.59991	up	[G]	Carbohydrate transport and metabolism	Molecular Function: fructose-bisphosphate aldolase activity (GO:0004332);; Biological Process: glycolytic process (GO:0006096);;	K01623|9.0e-201|sot:102577529|K01623 fructose-bisphosphate aldolase, class I [EC:4.1.2.13] | (RefSeq) fructose-bisphosphate aldolase, cytoplasmic isozyme 1	Glycolysis / Gluconeogenesis (ko00010);; Pentose phosphate pathway (ko00030);; Fructose and mannose metabolism (ko00051);; Carbon fixation in photosynthetic organisms (ko00710);; Carbon metabolism (ko01200);; Biosynthesis of amino acids (ko01230)	[G]	Carbohydrate transport and metabolism	Fructose-bisphosphate aldolase class-I	Fructose-bisphosphate aldolase 5, cytosolic OS=Arabidopsis thaliana OX=3702 GN=FBA5 PE=1 SV=1	G	Carbohydrate transport and metabolism	PREDICTED: fructose-bisphosphate aldolase, cytoplasmic isozyme 1 [Solanum tuberosum]
gene.Soltu.DM.12G006980.1	344	378	360	613	574	650	950	1127	861	6.11954	5.98273	5.97413	9.718	10.321	10.548	15.7037	18.4954	15.9488	0.000200134	1.09106	up	--	--	Molecular Function: UDP-glycosyltransferase activity (GO:0008194);;	K22706|2.9e-186|pper:18788923|K22706 (R)-mandelonitrile beta-glucosyltransferase [EC:2.4.1.354] | (RefSeq) 7-deoxyloganetin glucosyltransferase	Cyanoamino acid metabolism (ko00460)	[GC]	Carbohydrate transport and metabolism;; Energy production and conversion	UDP-glucoronosyl and UDP-glucosyl transferase	7-deoxyloganetin glucosyltransferase OS=Gardenia jasminoides OX=114476 GN=UGT85A24 PE=1 SV=1	S	Function unknown	PREDICTED: 7-deoxyloganetin glucosyltransferase-like [Solanum tuberosum]
gene.Soltu.DM.09G003580.1	772	1039	873	3078	2476	2954	2194	2572	2127	14.896	17.7951	15.676	52.8383	48.1881	51.8884	39.2317	45.6656	42.6341	1.69857e-55	1.45521	up	[HR]	Coenzyme transport and metabolism;; General function prediction only	--	--	--	--	--	Alpha/beta hydrolase family	--	--	--	PREDICTED: uncharacterized protein LOC102582919 [Solanum tuberosum]
gene.Soltu.DM.01G039710.1	9	22	18	198	166	246	319	457	352	0.192436	0.438748	0.377066	4.03887	3.83863	5.13091	6.7762	9.63895	8.37428	1.92444e-20	4.11722	up	--	--	Molecular Function: molecular_function (GO:0003674);; Molecular Function: binding (GO:0005488);; Molecular Function: protein binding (GO:0005515);; Molecular Function: carbohydrate binding (GO:0030246);;	K03188|1.6e-75|dcr:108224146|K03188 urease accessory protein | (RefSeq) uncharacterized protein LOC108224146 isoform X1	--	--	--	Phloem protein 2	F-box protein PP2-B15 OS=Arabidopsis thaliana OX=3702 GN=PP2B15 PE=2 SV=2	S	Function unknown	PREDICTED: F-box protein PP2-B15-like [Solanum tuberosum]
gene.Soltu.DM.07G017550.1	92	93	71	385	312	277	634	692	586	6.06668	5.44224	4.32036	22.6591	20.7694	16.6495	38.8468	42.0947	40.2622	2.03253e-10	2.45109	up	--	--	Molecular Function: magnesium ion binding (GO:0000287);; Molecular Function: terpene synthase activity (GO:0010333);;	K15803|4.3e-62|sot:102598796|K15803 (-)-germacrene D synthase [EC:4.2.3.75] | (RefSeq) (-)-germacrene D synthase-like	Sesquiterpenoid and triterpenoid biosynthesis (ko00909)	--	--	Terpene synthase, N-terminal domain	Beta-caryophyllene synthase OS=Phyla dulcis OX=542674 PE=1 SV=1	S	Function unknown	PREDICTED: beta-caryophyllene synthase-like [Solanum tuberosum]
gene.Soltu.DM.10G018840.1	2832	3905	3398	1321	1214	1384	2121	2147	2164	138.536	169.572	154.742	57.4672	59.911	61.6097	96.15	96.6212	109.948	0.000772394	-1.00538	down	--	--	Biological Process: lipid transport (GO:0006869);; Molecular Function: lipid binding (GO:0008289);;	--	--	--	--	Protease inhibitor/seed storage/LTP family	Non-specific lipid-transfer protein 1 OS=Solanum pennellii OX=28526 GN=LTP1 PE=3 SV=1	U	Intracellular trafficking, secretion, and vesicular transport	PREDICTED: non-specific lipid-transfer protein 1 [Solanum tuberosum]
gene.Soltu.DM.01G032600.3	720	725	664	414	313	367	360	256	144	10.2589	9.1815	8.80728	5.24954	4.49314	4.75714	4.75063	3.35436	2.12725	4.05579e-06	-1.27308	down	--	--	Cellular Component: integral component of membrane (GO:0016021);; Molecular Function: transmembrane transporter activity (GO:0022857);;	K18696|1.9e-08|qsu:112020699|K18696 glycerophosphodiester phosphodiesterase [EC:3.1.4.46] | (RefSeq) glycerophosphocholine phosphodiesterase GDE1-like	Glycerophospholipid metabolism (ko00564)	[R]	General function prediction only	Major Facilitator Superfamily	SPX domain-containing membrane protein At4g22990 OS=Arabidopsis thaliana OX=3702 GN=At4g22990 PE=2 SV=2	P	Inorganic ion transport and metabolism	PREDICTED: SPX domain-containing membrane protein At4g22990-like isoform X1 [Solanum tuberosum]
gene.Soltu.DM.03G024110.1	29	29	23	49	65	94	99	145	84	0.903284	0.800468	0.679917	1.39068	2.08123	2.71173	2.93459	4.25559	2.78951	0.000279128	1.66859	up	--	--	Molecular Function: endopeptidase inhibitor activity (GO:0004866);;	--	--	--	--	Trypsin and protease inhibitor	Probable serine protease inhibitor 6 OS=Solanum tuberosum OX=4113 PE=2 SV=1	--	--	PREDICTED: serine protease inhibitor 5-like [Solanum tuberosum]
gene.Soltu.DM.06G022040.1	17	19	16	114	89	87	83	109	93	0.165538	0.166683	0.150724	1.04081	0.919159	0.80696	0.785054	1.02278	0.992874	3.35262e-17	2.4041	up	[ET]	Amino acid transport and metabolism;; Signal transduction mechanisms	Molecular Function: ligand-gated ion channel activity (GO:0015276);; Cellular Component: integral component of membrane (GO:0016021);;	K05387|0.0e+00|sly:101262020|K05387 glutamate receptor, ionotropic, plant | (RefSeq) glutamate receptor 2.8	--	[PET]	Inorganic ion transport and metabolism;; Amino acid transport and metabolism;; Signal transduction mechanisms	Receptor family ligand binding region	Glutamate receptor 2.8 OS=Arabidopsis thaliana OX=3702 GN=GLR2.8 PE=2 SV=2	P	Inorganic ion transport and metabolism	glutamate receptor 2.8 [Solanum lycopersicum]
gene.Soltu.DM.04G032340.1	39	26	57	152	94	136	99	130	131	1.5396	0.896664	2.10342	5.34995	3.7538	4.88369	3.61494	4.72904	5.37922	5.36926e-06	1.52531	up	--	--	--	--	--	--	--	--	--	S	Function unknown	uncharacterized protein LOC104647238 [Solanum lycopersicum]
gene.Soltu.DM.09G024250.1	95	94	70	261	198	147	245	268	244	1.14366	1.00442	0.781556	2.81074	2.42026	1.62142	2.75054	2.98877	3.07531	3.43233e-06	1.3393	up	[M]	Cell wall/membrane/envelope biogenesis	Molecular Function: protein serine/threonine kinase activity (GO:0004674);; Molecular Function: ATP binding (GO:0005524);; Cellular Component: integral component of membrane (GO:0016021);; Biological Process: recognition of pollen (GO:0048544);;	K13420|2.8e-61|mesc:110601988|K13420 LRR receptor-like serine/threonine-protein kinase FLS2 [EC:2.7.11.1] | (RefSeq) LRR receptor-like serine/threonine-protein kinase FLS2	MAPK signaling pathway - plant (ko04016);; Plant-pathogen interaction (ko04626)	--	--	Protein kinase domain	G-type lectin S-receptor-like serine/threonine-protein kinase LECRK1 OS=Oryza sativa subsp. japonica OX=39947 GN=LECRK1 PE=2 SV=1	T	Signal transduction mechanisms	PREDICTED: G-type lectin S-receptor-like serine/threonine-protein kinase RLK1 [Solanum tuberosum]
gene.Soltu.DM.06G014640.1	243	248	199	447	379	463	603	635	506	4.69492	4.25345	3.58168	7.68459	7.39806	8.15565	10.8114	11.3047	10.1707	3.46554e-06	1.07827	up	[Q]	Secondary metabolites biosynthesis, transport and catabolism	Molecular Function: oxidoreductase activity (GO:0016491);; Molecular Function: metal ion binding (GO:0046872);;	K13229|4.8e-85|sbi:8070754|K13229 2,4-dihydroxy-1,4-benzoxazin-3-one-glucoside dioxygenase [EC:1.14.11.59] | (RefSeq) DIBOA-glucoside dioxygenase BX6	Benzoxazinoid biosynthesis (ko00402)	[QR]	Secondary metabolites biosynthesis, transport and catabolism;; General function prediction only	2OG-Fe(II) oxygenase superfamily	1-aminocyclopropane-1-carboxylate oxidase homolog 1 OS=Arabidopsis thaliana OX=3702 GN=At1g06620 PE=2 SV=1	S	Function unknown	PREDICTED: 1-aminocyclopropane-1-carboxylate oxidase homolog 1-like [Solanum tuberosum]
gene.Soltu.DM.09G026050.1	64	101	108	299	280	261	117	159	135	1.29494	1.80557	2.02714	5.38022	5.70348	4.79459	2.19072	2.95922	2.83761	0.00713954	1.12238	up	[Q]	Secondary metabolites biosynthesis, transport and catabolism	Molecular Function: oxidoreductase activity (GO:0016491);; Molecular Function: metal ion binding (GO:0046872);;	K13229|3.9e-68|ats:109766943|K13229 2,4-dihydroxy-1,4-benzoxazin-3-one-glucoside dioxygenase [EC:1.14.11.59] | (RefSeq) LOC109766943; DIBOA-glucoside dioxygenase BX6-like	Benzoxazinoid biosynthesis (ko00402)	[QR]	Secondary metabolites biosynthesis, transport and catabolism;; General function prediction only	2OG-Fe(II) oxygenase superfamily	1-aminocyclopropane-1-carboxylate oxidase homolog OS=Solanum lycopersicum OX=4081 GN=ACO3 PE=2 SV=1	S	Function unknown	1-aminocyclopropane-1-carboxylate oxidase homolog [Solanum lycopersicum]
gene.Soltu.DM.03G012690.1	125	153	150	827	580	633	1390	1225	1234	4.59477	5.01555	5.15357	27.2083	21.612	21.314	47.6578	41.6665	47.3823	1.52348e-15	2.74279	up	--	--	Biological Process: response to acid chemical (GO:0001101);; Molecular Function: protein binding (GO:0005515);; Cellular Component: cellular_component (GO:0005575);; Cellular Component: intracellular (GO:0005622);; Cellular Component: cell (GO:0005623);; Cellular Component: cytoplasm (GO:0005737);; Cellular Component: vacuole (GO:0005773);; Cellular Component: vacuolar membrane (GO:0005774);; Cel…	--	--	--	--	PLAT/LH2 domain	PLAT domain-containing protein 3 OS=Arabidopsis thaliana OX=3702 GN=PLAT3 PE=4 SV=1	--	--	PLAT domain-containing protein 3-like [Solanum pennellii]
Solanum_tuberosum_newGene_141	36	74	75	92	109	171	167	117	151	1.36965	2.54578	2.6996	3.17569	4.2702	6.05412	6.02229	4.16374	6.08609	0.0079449	1.08655	up	--	--	Biological Process: defense response (GO:0006952);;	--	--	--	--	Pathogenesis-related protein Bet v 1 family	Kirola OS=Actinidia deliciosa OX=3627 PE=1 SV=1	--	--	PREDICTED: kirola-like [Solanum tuberosum]
Solanum_tuberosum_newGene_2263	199	170	163	93	81	68	32	42	49	9.19122	6.96373	6.9815	3.81646	3.74524	2.84706	1.36198	1.78263	2.3133	1.67177e-05	-1.62638	down	--	--	Biological Process: defense response (GO:0006952);;	--	--	--	--	Pathogenesis-related protein Bet v 1 family	--	S	Function unknown	PREDICTED: kirola-like [Solanum tuberosum]
gene.Soltu.DM.01G048190.1	2096	2318	2083	633	520	496	819	743	576	31.3368	30.7691	28.9931	8.42202	7.83789	6.73939	11.3422	10.2196	8.94462	2.14981e-23	-1.8369	down	[C]	Energy production and conversion	Molecular Function: oxidoreductase activity (GO:0016491);; Molecular Function: heme binding (GO:0020037);; Molecular Function: iron-sulfur cluster binding (GO:0051536);;	K00366|0.0e+00|sot:102581851|K00366 ferredoxin-nitrite reductase [EC:1.7.7.1] | (RefSeq) NIR; ferredoxin--nitrite reductase, chloroplastic	Nitrogen metabolism (ko00910)	[P]	Inorganic ion transport and metabolism	Nitrite and sulphite reductase 4Fe-4S domain	Ferredoxin--nitrite reductase, chloroplastic OS=Betula pendula OX=3505 GN=NIR1 PE=2 SV=1	C	Energy production and conversion	ferredoxin--nitrite reductase, chloroplastic [Solanum tuberosum]
gene.Soltu.DM.06G006670.1	25	35	35	111	86	94	134	128	136	1.57329	1.95293	2.0298	6.27912	5.47549	5.4275	7.88055	7.45346	8.95524	1.24708e-08	1.81129	up	--	--	Molecular Function: UDP-glycosyltransferase activity (GO:0008194);;	K13691|1.1e-23|sita:101767525|K13691 pathogen-inducible salicylic acid glucosyltransferase [EC:2.4.1.-] | (RefSeq) crocetin glucosyltransferase 2	--	[GC]	Carbohydrate transport and metabolism;; Energy production and conversion	UDP-glucoronosyl and UDP-glucosyl transferase	UDP-glycosyltransferase 87A2 OS=Arabidopsis thaliana OX=3702 GN=UGT87A2 PE=1 SV=1	S	Function unknown	PREDICTED: UDP-glycosyltransferase 87A2-like [Solanum tuberosum]
gene.Soltu.DM.08G019020.1	14	20	23	74	45	82	87	70	84	0.336287	0.438904	0.529834	1.63748	1.11577	1.85379	2.01307	1.60513	2.1728	4.38494e-07	1.89987	up	--	--	Cellular Component: integral component of membrane (GO:0016021);;	--	--	--	--	Leucine rich repeat	--	S	Function unknown	PREDICTED: receptor-like protein 12 [Solanum tuberosum]
gene.Soltu.DM.05G024170.1	0	12	11	70	474	35	38	632	491	0	0.215945	0.208282	1.29004	9.98693	0.655147	0.721332	12.1551	10.6714	0.000553824	5.27661	up	[S]	Function unknown	Cellular Component: integral component of membrane (GO:0016021);;	--	--	--	--	Protein of unknown function (DUF1365)	--	S	Function unknown	PREDICTED: uncharacterized protein LOC102595323 [Solanum tuberosum]
gene.Soltu.DM.07G026590.3	107	179	108	87	41	61	80	59	69	1.71808	2.56731	1.61686	1.23912	0.663528	0.891281	1.1883	0.877983	1.15849	0.00216623	-1.0378	down	--	--	Cellular Component: integral component of membrane (GO:0016021);;	--	--	--	--	Protein of unknown function (DUF3537)	--	S	Function unknown	PREDICTED: uncharacterized protein LOC102602141 isoform X1 [Solanum tuberosum]
gene.Soltu.DM.05G025440.1	43	80	49	10	9	26	12	12	5	0.453621	0.759786	0.486662	0.091546	0.088109	0.252339	0.114755	0.109767	0.05478	2.59745e-05	-2.2842	down	[V]	Defense mechanisms	Molecular Function: ATP binding (GO:0005524);; Molecular Function: electron carrier activity (GO:0009055);; Cellular Component: integral component of membrane (GO:0016021);; Molecular Function: ATPase activity (GO:0016887);;	K05681|2.0e-93|gmx:100818395|K05681 ATP-binding cassette, subfamily G (WHITE), member 2 | (RefSeq) ABC transporter G family member 5	ABC transporters (ko02010)	[Q]	Secondary metabolites biosynthesis, transport and catabolism	ABC-2 type transporter	ABC transporter G family member 1 OS=Arabidopsis thaliana OX=3702 GN=ABCG1 PE=2 SV=1	V	Defense mechanisms	PREDICTED: ABC transporter G family member 1 [Solanum tuberosum]
gene.Soltu.DM.06G029820.1	197	277	184	753	565	762	498	479	376	3.20417	4.00164	2.77754	10.8904	9.26925	11.2823	7.5097	7.16244	6.34212	2.61175e-09	1.31115	up	[Q]	Secondary metabolites biosynthesis, transport and catabolism	Biological Process: lipid metabolic process (GO:0006629);; Molecular Function: fatty-acyl-CoA reductase (alcohol-forming) activity (GO:0080019);;	K13356|3.4e-283|sot:102603161|K13356 alcohol-forming fatty acyl-CoA reductase [EC:1.2.1.84] | (RefSeq) fatty acyl-CoA reductase 3	Cutin, suberine and wax biosynthesis (ko00073);; Peroxisome (ko04146)	[I]	Lipid transport and metabolism	Male sterility protein	Fatty acyl-CoA reductase 3 OS=Arabidopsis thaliana OX=3702 GN=FAR3 PE=1 SV=1	S	Function unknown	PREDICTED: fatty acyl-CoA reductase 3 [Solanum tuberosum]
gene.Soltu.DM.07G015230.1	392	748	452	360	252	256	291	216	185	7.8594	13.3104	8.42636	6.41666	5.09875	4.67302	5.40197	3.98587	3.84415	1.15172e-05	-1.08326	down	--	--	Cellular Component: cellular_component (GO:0005575);; Cellular Component: intracellular (GO:0005622);; Cellular Component: cell (GO:0005623);; Cellular Component: cytoplasm (GO:0005737);; Cellular Component: vacuole (GO:0005773);; Cellular Component: vacuolar membrane (GO:0005774);; Cellular Component: plasma membrane (GO:0005886);; Cellular Component: membrane (GO:0016020);; Cellular Component: …	--	--	--	--	Fasciclin domain	Fasciclin-like arabinogalactan protein 2 OS=Arabidopsis thaliana OX=3702 GN=FLA2 PE=2 SV=1	M	Cell wall/membrane/envelope biogenesis	PREDICTED: fasciclin-like arabinogalactan protein 2 [Solanum tuberosum]
gene.Soltu.DM.01G047180.1	15	25	18	48	39	44	32	69	47	1.48999	2.15522	1.63602	4.2764	3.94117	4.04733	2.95424	6.34709	4.93631	0.00591377	1.21223	up	--	--	Molecular Function: UDP-glycosyltransferase activity (GO:0008194);;	K23260|1.4e-24|pavi:110765167|K23260 scopoletin glucosyltransferase [EC:2.4.1.128] | (RefSeq) UDP-glucose flavonoid 3-O-glucosyltransferase 7-like	Phenylpropanoid biosynthesis (ko00940)	[GC]	Carbohydrate transport and metabolism;; Energy production and conversion	--	Anthocyanin 3'-O-beta-glucosyltransferase OS=Gentiana triflora OX=55190 PE=1 SV=1	S	Function unknown	PREDICTED: scopoletin glucosyltransferase-like [Solanum tuberosum]
gene.Soltu.DM.02G020890.1	1699	2230	1904	6112	5248	5868	2431	2842	2286	26.0883	30.4055	27.2274	83.5408	81.324	82.0485	34.6114	40.1676	36.4807	0.0059782	1.0036	up	[E]	Amino acid transport and metabolism	Molecular Function: oxidoreductase activity (GO:0016491);;	K17839|3.1e-292|sot:102591553|K17839 polyamine oxidase [EC:1.5.3.17 1.5.3.-] | (RefSeq) probable polyamine oxidase 4	Arginine and proline metabolism (ko00330);; beta-Alanine metabolism (ko00410);; Pantothenate and CoA biosynthesis (ko00770)	[Q]	Secondary metabolites biosynthesis, transport and catabolism	Flavin containing amine oxidoreductase	Probable polyamine oxidase 4 OS=Arabidopsis thaliana OX=3702 GN=PAO4 PE=1 SV=1	S	Function unknown	PREDICTED: probable polyamine oxidase 4 [Solanum tuberosum]
gene.Soltu.DM.03G015460.1	1596	1843	1575	4046	3582	3981	4055	4420	3878	57.8147	59.255	53.1124	130.392	130.881	131.27	136.156	147.324	145.922	2.83102e-42	1.19822	up	--	--	Molecular Function: enzyme inhibitor activity (GO:0004857);;	K01051|1.1e-14|han:110880309|K01051 pectinesterase [EC:3.1.1.11] | (RefSeq) pectinesterase-like	Pentose and glucuronate interconversions (ko00040)	--	--	Plant invertase/pectin methylesterase inhibitor	21 kDa protein OS=Daucus carota OX=4039 PE=2 SV=1	S	Function unknown	PREDICTED: 21 kDa protein-like [Solanum tuberosum]
gene.Soltu.DM.09G022620.1	68	73	62	197	146	202	162	202	199	1.26899	1.21721	1.08653	3.29679	2.76303	3.45023	2.82368	3.49812	3.87766	8.26898e-12	1.38677	up	--	--	Biological Process: action potential (GO:0001508);; Biological Process: regulation of heart rate (GO:0002027);; Biological Process: system process (GO:0003008);; Biological Process: muscle system process (GO:0003012);; Biological Process: circulatory system process (GO:0003013);; Biological Process: heart process (GO:0003015);; Biological Process: cardiac chamber development (GO:0003205);; Biolog…	K21867|2.0e-06|jcu:105633346|K21867 potassium channel | (RefSeq) potassium channel AKT2/3	--	--	--	Ankyrin repeats (3 copies)	Protein VAPYRIN-LIKE OS=Medicago truncatula OX=3880 GN=VPYL PE=2 SV=1	S	Function unknown	uncharacterized protein LOC107030791 isoform X1 [Solanum pennellii]
gene.Soltu.DM.01G045930.1	1125	1067	991	6063	4897	5501	5404	5431	5240	36.0248	30.3293	29.5447	172.807	158.252	160.407	160.452	160.078	174.354	1.70859e-153	2.28686	up	[S]	Function unknown	Cellular Component: extracellular region (GO:0005576);;	K13449|6.9e-109|sot:102589441|K13449 pathogenesis-related protein 1 | (RefSeq) basic form of pathogenesis-related protein 1-like	MAPK signaling pathway - plant (ko04016);; Plant hormone signal transduction (ko04075);; Plant-pathogen interaction (ko04626)	[S]	Function unknown	Cysteine-rich secretory protein family	Basic form of pathogenesis-related protein 1 OS=Nicotiana tabacum OX=4097 PE=3 SV=1	S	Function unknown	PREDICTED: basic form of pathogenesis-related protein 1-like [Solanum tuberosum]
gene.Soltu.DM.02G014760.1	39	94	46	29	11	4	5	5	2	0.953147	2.04951	1.05005	0.635564	0.256347	0.088333	0.10654	0.106011	0.050763	0.00250652	-2.75884	down	[IR]	Lipid transport and metabolism;; General function prediction only	Molecular Function: hydrolase activity, acting on ester bonds (GO:0016788);;	K00679|4.7e-40|cic:CICLE_v10027727mg|K00679 phospholipid:diacylglycerol acyltransferase [EC:2.3.1.158] | (RefSeq) hypothetical protein	Glycerolipid metabolism (ko00561)	--	--	GDSL-like Lipase/Acylhydrolase	GDSL esterase/lipase At1g29670 OS=Arabidopsis thaliana OX=3702 GN=At1g29670 PE=2 SV=1	--	--	PREDICTED: GDSL esterase/lipase At1g29670-like [Solanum tuberosum]
gene.Soltu.DM.09G004580.1	167	250	237	1282	1114	1267	678	846	579	5.17485	6.87611	6.83569	35.3385	34.8319	35.7447	19.4606	24.1214	18.6369	1.7613e-16	2.06436	up	--	--	--	--	--	--	--	VQ motif	VQ motif-containing protein 29 OS=Arabidopsis thaliana OX=3702 GN=VQ29 PE=1 SV=1	S	Function unknown	VQ motif-containing protein 29-like [Solanum pennellii]
Solanum_tuberosum_newGene_2844	66	72	111	7	11	13	16	12	17	3.56479	3.48844	5.62067	0.323025	0.558198	0.644059	0.811603	0.59748	0.933124	1.44645e-10	-2.76426	down	--	--	--	--	--	--	--	--	--	--	--	PREDICTED: uncharacterized protein LOC107060695 [Solanum tuberosum]
gene.Soltu.DM.04G019680.1	198	181	211	641	419	545	611	628	596	3.14688	2.55444	3.12727	9.10396	6.73719	7.91721	9.03239	9.22482	9.87582	5.74341e-16	1.47681	up	[P]	Inorganic ion transport and metabolism	Cellular Component: plasma membrane (GO:0005886);; Molecular Function: ammonium transmembrane transporter activity (GO:0008519);; Biological Process: methylammonium transport (GO:0015843);; Cellular Component: integral component of membrane (GO:0016021);;	K03320|6.4e-285|sot:102578704|K03320 ammonium transporter, Amt family | (RefSeq) ammonium transporter 1 member 2	--	[P]	Inorganic ion transport and metabolism	Ammonium Transporter Family	Ammonium transporter 1 member 2 OS=Solanum lycopersicum OX=4081 GN=AMT1-2 PE=2 SV=1	P	Inorganic ion transport and metabolism	PREDICTED: ammonium transporter 1 member 2 [Solanum tuberosum]
gene.Soltu.DM.06G012170.1	152	110	111	350	292	275	1809	1915	1514	3.98839	2.54834	2.69903	8.16637	7.71901	6.55052	43.9961	46.2424	41.2744	0.00165178	3.00951	up	[P]	Inorganic ion transport and metabolism	Molecular Function: superoxide dismutase activity (GO:0004784);; Molecular Function: metal ion binding (GO:0046872);;	K04564|1.0e-100|sot:102588174|K04564 superoxide dismutase, Fe-Mn family [EC:1.15.1.1] | (RefSeq) superoxide dismutase [Fe], chloroplastic-like	Peroxisome (ko04146)	[P]	Inorganic ion transport and metabolism	Iron/manganese superoxide dismutases, alpha-hairpin domain	Superoxide dismutase [Fe], chloroplastic (Fragment) OS=Nicotiana plumbaginifolia OX=4092 GN=SODB PE=2 SV=1	P	Inorganic ion transport and metabolism	PREDICTED: superoxide dismutase [Fe], chloroplastic-like [Solanum tuberosum]
gene.Soltu.DM.07G018400.1	308	368	308	132	127	148	139	121	121	13.1255	13.9035	12.2026	4.97952	5.45385	5.71774	5.47032	4.71695	5.35153	1.20442e-28	-1.3817	down	--	--	--	--	--	--	--	--	--	--	--	PREDICTED: uncharacterized protein LOC102604346 [Solanum tuberosum]
Solanum_tuberosum_newGene_246	8	9	9	58	42	41	16	31	20	0.147147	0.156693	0.158943	1.05043	0.869807	0.755343	0.299079	0.58396	0.415684	0.00192998	1.91306	up	--	--	Cellular Component: integral component of membrane (GO:0016021);;	--	--	--	--	--	--	--	--	--
gene.Soltu.DM.09G017260.1	136	143	145	408	342	420	360	402	360	3.30665	3.08821	3.29124	8.85873	8.40806	9.31052	8.14274	9.0151	9.12504	2.04444e-32	1.36924	up	--	--	Biological Process: activation of innate immune response (GO:0002218);; Biological Process: response to molecule of bacterial origin (GO:0002237);; Biological Process: activation of immune response (GO:0002253);; Biological Process: immune system process (GO:0002376);; Biological Process: regulation of immune system process (GO:0002682);; Biological Process: negative regulation of immune system p…	K13456|2.3e-122|sot:102596147|K13456 RPM1-interacting protein 4 | (RefSeq) RPM1-interacting protein 4	Plant-pathogen interaction (ko04626)	--	--	Cleavage site for pathogenic type III effector avirulence factor Avr	RPM1-interacting protein 4 OS=Arabidopsis thaliana OX=3702 GN=RIN4 PE=1 SV=1	S	Function unknown	PREDICTED: RPM1-interacting protein 4 isoform X2 [Solanum tuberosum]
gene.Soltu.DM.11G005440.1	15	15	3	39	37	57	51	55	49	0.225501	0.192888	0.042444	0.530197	0.56178	0.791347	0.725153	0.769884	0.770507	5.01489e-05	2.06915	up	--	--	Molecular Function: UDP-glycosyltransferase activity (GO:0008194);;	K13080|3.0e-129|vvi:100244875|K13080 flavanone 7-O-glucoside 2''-O-beta-L-rhamnosyltransferase [EC:2.4.1.236] | (RefSeq) flavanone 7-O-glucoside 2''-O-beta-L-rhamnosyltransferase	Flavonoid biosynthesis (ko00941);; Flavone and flavonol biosynthesis (ko00944)	[GC]	Carbohydrate transport and metabolism;; Energy production and conversion	UDP-glucoronosyl and UDP-glucosyl transferase	UDP-glucosyltransferase 29 OS=Panax ginseng OX=4054 GN=UGT29 PE=1 SV=1	S	Function unknown	hypothetical protein EJD97_021643 [Solanum chilense]
gene.Soltu.DM.01G037020.1	9356	6256	13353	4629	4651	4580	5904	4687	5312	84.8583	50.372	112.748	37.3547	42.5524	37.8106	49.6319	39.115	50.0467	0.00018304	-1.03082	down	[T]	Signal transduction mechanisms	Molecular Function: protein kinase activity (GO:0004672);; Molecular Function: ATP binding (GO:0005524);;	K20715|0.0e+00|sot:102597308|K20715 phototropin [EC:2.7.11.1] | (RefSeq) phototropin-2	--	--	--	Protein kinase domain	Phototropin-2 OS=Arabidopsis thaliana OX=3702 GN=PHOT2 PE=1 SV=2	T	Signal transduction mechanisms	PREDICTED: phototropin-2 isoform X1 [Solanum tuberosum]
gene.Soltu.DM.10G017920.1	76	131	141	338	253	283	605	735	736	1.82955	2.82001	3.17127	7.29971	6.18631	6.24688	13.6266	16.4337	18.5755	2.76291e-05	2.06146	up	[G]	Carbohydrate transport and metabolism	Molecular Function: chitinase activity (GO:0004568);; Biological Process: carbohydrate metabolic process (GO:0005975);; Biological Process: chitin catabolic process (GO:0006032);; Molecular Function: chitin binding (GO:0008061);; Biological Process: cell wall macromolecule catabolic process (GO:0016998);;	K20547|7.5e-175|sot:102590097|K20547 basic endochitinase B [EC:3.2.1.14] | (RefSeq) endochitinase 3-like	Amino sugar and nucleotide sugar metabolism (ko00520);; MAPK signaling pathway - plant (ko04016)	[R]	General function prediction only	Chitinase class I	Endochitinase 3 (Fragment) OS=Solanum tuberosum OX=4113 GN=CHTB3 PE=2 SV=1	G	Carbohydrate transport and metabolism	PREDICTED: LOW QUALITY PROTEIN: endochitinase 3-like [Solanum tuberosum]
gene.Soltu.DM.12G000900.1	4	4	7	53	65	49	92	110	100	0.130393	0.154352	0.260039	2.02975	2.8102	1.9199	3.68389	4.37601	4.47799	3.14659e-11	3.92453	up	--	--	Cellular Component: integral component of membrane (GO:0016021);;	--	--	--	--	Leucine rich repeat	Receptor-like protein Cf-9 homolog OS=Solanum lycopersicum OX=4081 GN=HCR9-0 PE=2 SV=2	S	Function unknown	PREDICTED: receptor-like protein 12 [Solanum tuberosum]
gene.Soltu.DM.11G021860.1	114	137	144	214	212	197	387	313	311	2.01919	2.16433	2.37595	3.39399	3.798	3.1827	6.39155	5.13166	5.75208	0.00507875	1.00512	up	--	--	Molecular Function: hydrolase activity, hydrolyzing O-glycosyl compounds (GO:0004553);; Biological Process: carbohydrate metabolic process (GO:0005975);; Cellular Component: integral component of membrane (GO:0016021);;	K19891|5.5e-71|ath:AT2G01630|K19891 glucan endo-1,3-beta-glucosidase 1/2/3 [EC:3.2.1.39] | (RefSeq) O-Glycosyl hydrolases family 17 protein	Starch and sucrose metabolism (ko00500)	--	--	Glycosyl hydrolases family 17	Glucan endo-1,3-beta-glucosidase 14 OS=Arabidopsis thaliana OX=3702 GN=At2g27500 PE=2 SV=2	G	Carbohydrate transport and metabolism	PREDICTED: glucan endo-1,3-beta-glucosidase 14-like isoform X1 [Solanum tuberosum]
gene.Soltu.DM.07G006210.1	288	447	385	255	197	162	63	118	158	10.5786	14.6028	13.183	8.34814	7.31681	5.42347	2.13207	3.9853	6.02732	0.0028413	-1.29369	down	--	--	--	--	--	--	--	Organ specific protein	--	--	--	PREDICTED: organ-specific protein S2-like isoform X2 [Solanum tuberosum]
gene.Soltu.DM.09G024590.1	21	74	48	144	121	182	78	124	76	0.627619	1.99734	1.36975	3.93627	3.75434	5.09072	2.20587	3.48975	2.41942	0.00624662	1.28741	up	[JO]	Translation, ribosomal structure and biogenesis;; Posttranslational modification, protein turnover, chaperones	Molecular Function: N-acetyltransferase activity (GO:0008080);;	--	--	--	--	Acetyltransferase (GNAT) domain	--	J	Translation, ribosomal structure and biogenesis	PREDICTED: uncharacterized N-acetyltransferase p20-like [Solanum tuberosum]
gene.Soltu.DM.06G005820.1	14	25	31	77	33	65	95	113	67	0.212084	0.356947	0.454525	1.10154	0.532262	0.945816	1.40488	1.6655	1.11404	0.00177966	1.62597	up	--	--	Molecular Function: calmodulin binding (GO:0005516);; Biological Process: defense response (GO:0006952);; Biological Process: response to biotic stimulus (GO:0009607);; Cellular Component: integral component of membrane (GO:0016021);;	K08472|0.0e+00|sot:102599123|K08472 mlo protein | (RefSeq) MLO-like protein 6	--	--	--	Mlo family	MLO-like protein 6 OS=Arabidopsis thaliana OX=3702 GN=MLO6 PE=2 SV=2	D	Cell cycle control, cell division, chromosome partitioning	PREDICTED: MLO-like protein 6 [Solanum tuberosum]
gene.Soltu.DM.01G036450.1	7754	8132	7772	23450	19405	22025	23831	25462	23364	241.517	224.886	225.364	649.924	609.751	624.509	688.013	729.763	755.997	1.03549e-42	1.47908	up	--	--	Molecular Function: chitin binding (GO:0008061);; Biological Process: defense response to bacterium (GO:0042742);; Biological Process: defense response to fungus (GO:0050832);;	K20547|5.6e-17|ghi:107912863|K20547 basic endochitinase B [EC:3.2.1.14] | (RefSeq) endochitinase-like	Amino sugar and nucleotide sugar metabolism (ko00520);; MAPK signaling pathway - plant (ko04016)	[R]	General function prediction only	Barwin family	Wound-induced protein WIN2 OS=Solanum tuberosum OX=4113 GN=WIN2 PE=2 SV=1	G	Carbohydrate transport and metabolism	wound-induced protein WIN2 precursor [Solanum tuberosum]
gene.Soltu.DM.09G008330.1	27	43	46	81	73	57	238	248	264	0.328625	0.472724	0.523623	0.896806	0.91978	0.639091	2.74769	2.84124	3.41314	0.00527774	2.0392	up	[M]	Cell wall/membrane/envelope biogenesis	Molecular Function: protein kinase activity (GO:0004672);; Molecular Function: calcium ion binding (GO:0005509);; Molecular Function: ATP binding (GO:0005524);; Cellular Component: integral component of membrane (GO:0016021);; Molecular Function: polysaccharide binding (GO:0030247);;	K23544|7.1e-110|brp:103842861|K23544 serine incorporator 1/3 | (RefSeq) serine incorporator 3	--	--	--	Protein kinase domain	Wall-associated receptor kinase 2 OS=Arabidopsis thaliana OX=3702 GN=WAK2 PE=1 SV=1	T	Signal transduction mechanisms	PREDICTED: wall-associated receptor kinase 2-like [Solanum tuberosum]
gene.Soltu.DM.11G013680.1	224	239	227	73	108	91	28	19	18	27.0051	25.6041	25.5198	7.82965	13.1393	9.99188	3.06659	2.08466	2.1434	0.00189614	-2.12375	down	[C]	Energy production and conversion	Molecular Function: ATP binding (GO:0005524);; Cellular Component: mitochondrion (GO:0005739);; Biological Process: ATP synthesis coupled proton transport (GO:0015986);; Cellular Component: proton-transporting ATP synthase complex, catalytic core F(1) (GO:0045261);; Molecular Function: proton-transporting ATP synthase activity, rotational mechanism (GO:0046933);;	K02132|1.9e-27|cann:19989019|K02132 F-type H+-transporting ATPase subunit alpha | (RefSeq) atp1, KY47_p139; ATP synthase F1 subunit 1	Oxidative phosphorylation (ko00190)	[C]	Energy production and conversion	ATP synthase alpha/beta family, beta-barrel domain	ATP synthase subunit alpha, mitochondrial OS=Nicotiana plumbaginifolia OX=4092 GN=ATPA PE=3 SV=1	C	Energy production and conversion	ATP synthase subunit 1 [Solanum torvum]
gene.Soltu.DM.02G007500.1	14	11	27	104	89	117	94	118	62	0.706668	0.475981	1.2419	4.69049	4.54127	5.4252	4.4097	5.54306	3.2535	2.31112e-11	2.40596	up	--	--	--	--	--	--	--	VQ motif	--	--	--	PREDICTED: uncharacterized protein LOC102593221 [Solanum tuberosum]
gene.Soltu.DM.02G022920.1	3636	2360	2317	4978	5395	4948	8407	8490	7998	105.64	60.856	62.6619	128.683	158.109	130.846	226.38	226.971	241.404	0.000190789	1.21415	up	[G]	Carbohydrate transport and metabolism	Molecular Function: chitinase activity (GO:0004568);; Biological Process: carbohydrate metabolic process (GO:0005975);; Biological Process: chitin catabolic process (GO:0006032);; Biological Process: cell wall macromolecule catabolic process (GO:0016998);;	K20547|4.9e-145|sot:102577835|K20547 basic endochitinase B [EC:3.2.1.14] | (RefSeq) CHTA3, ChtA1, ChtA2, ChtA4; acidic endochitinase pcht28	Amino sugar and nucleotide sugar metabolism (ko00520);; MAPK signaling pathway - plant (ko04016)	[R]	General function prediction only	Chitinase class I	Acidic endochitinase pcht28 OS=Solanum chilense OX=4083 PE=2 SV=1	G	Carbohydrate transport and metabolism	acidic endochitinase pcht28 precursor [Solanum tuberosum]
gene.Soltu.DM.08G003110.1	1190	1321	1147	4986	3916	4509	5918	6356	5413	24.5655	24.2111	22.0382	91.6131	81.5729	84.7491	113.271	120.771	116.11	6.81642e-32	2.03271	up	--	--	Cellular Component: extracellular region (GO:0005576);; Cellular Component: cell wall (GO:0005618);; Molecular Function: hydrolase activity (GO:0016787);; Biological Process: cell wall organization (GO:0071555);;	K01280|1.3e-109|spen:107013676|K01280 tripeptidyl-peptidase II [EC:3.4.14.10] | (RefSeq) tripeptidyl-peptidase 2-like isoform X1	--	[M]	Cell wall/membrane/envelope biogenesis	Pectinacetylesterase	Pectin acetylesterase 8 OS=Arabidopsis thaliana OX=3702 GN=PAE8 PE=2 SV=1	S	Function unknown	PREDICTED: pectin acetylesterase 8-like [Solanum tuberosum]
gene.Soltu.DM.01G042450.1	1692	2052	1639	2636	2579	2603	5120	5295	4433	38.0351	40.9554	34.2968	52.7336	58.505	53.2871	106.713	109.567	103.565	0.00401839	1.03552	up	[J]	Translation, ribosomal structure and biogenesis	Molecular Function: structural constituent of ribosome (GO:0003735);; Cellular Component: ribosome (GO:0005840);; Biological Process: translation (GO:0006412);;	K02925|2.3e-226|sot:102590107|K02925 large subunit ribosomal protein L3e | (RefSeq) 60S ribosomal protein L3-2	Ribosome (ko03010)	[J]	Translation, ribosomal structure and biogenesis	Ribosomal protein L3	60S ribosomal protein L3-2 OS=Arabidopsis thaliana OX=3702 GN=ARP2 PE=2 SV=4	J	Translation, ribosomal structure and biogenesis	PREDICTED: 60S ribosomal protein L3-2 [Solanum tuberosum]
gene.Soltu.DM.07G016110.1	196	172	205	747	564	663	473	489	461	4.03766	3.13929	3.93839	13.7176	11.7549	12.4617	9.05641	9.28023	9.87597	5.31844e-18	1.48707	up	--	--	Cellular Component: integral component of membrane (GO:0016021);; Molecular Function: metal ion binding (GO:0046872);; Biological Process: oxidation-reduction process (GO:0055114);;	--	--	[T]	Signal transduction mechanisms	Protein of unknown function (DUF568)	Cytochrome b561 and DOMON domain-containing protein At4g17280 OS=Arabidopsis thaliana OX=3702 GN=At4g17280 PE=2 SV=1	S	Function unknown	putative membrane protein [Solanum tuberosum]
gene.Soltu.DM.09G025860.1	213	229	235	88	90	93	106	146	144	24.5802	23.4986	25.2703	9.0274	10.4211	9.77714	11.2801	15.5178	17.2696	0.000616778	-1.06936	down	--	--	Molecular Function: serine-type endopeptidase inhibitor activity (GO:0004867);; Biological Process: response to wounding (GO:0009611);;	K20769|1.7e-07|mesc:110611169|K20769 fatty acid omega-hydroxylase [EC:1.14.-.-] | (RefSeq) cytochrome P450 94A2-like	Cutin, suberine and wax biosynthesis (ko00073)	--	--	Potato inhibitor I family	Wound-induced proteinase inhibitor 1 OS=Solanum peruvianum OX=4082 PE=3 SV=1	S	Function unknown	PREDICTED: chymotrypsin inhibitor I, A, B and C subunits-like [Solanum tuberosum]
gene.Soltu.DM.08G024710.4	4	66	123	215	448	288	388	351	473	0.063111	1.03315	2.03302	3.40145	8.03659	4.66586	6.40282	5.74499	8.7538	0.00177812	2.47418	up	[R]	General function prediction only	Molecular Function: oxidoreductase activity (GO:0016491);;	--	--	[GQ]	Carbohydrate transport and metabolism;; Secondary metabolites biosynthesis, transport and catabolism	Oxidoreductase family, NAD-binding Rossmann fold	--	S	Function unknown	PREDICTED: inositol 2-dehydrogenase/D-chiro-inositol 3-dehydrogenase [Solanum tuberosum]
gene.Soltu.DM.02G006510.1	27	21	27	592	508	533	116	114	86	0.725086	0.50591	0.688511	14.4893	14.0967	13.3432	2.93844	2.87809	2.45299	3.25999e-07	3.58015	up	--	--	Molecular Function: transferase activity, transferring acyl groups other than amino-acyl groups (GO:0016747);;	K19747|1.3e-32|thj:104821386|K19747 BAHD acyltransferase [EC:2.3.1.-] | (RefSeq) BAHD acyltransferase DCR	--	--	--	Transferase family	Uncharacterized acetyltransferase At3g50280 OS=Arabidopsis thaliana OX=3702 GN=At3g50280 PE=3 SV=1	S	Function unknown	uncharacterized acetyltransferase At3g50280-like [Solanum pennellii]
gene.Soltu.DM.01G045020.1	87	110	102	9	22	33	14	21	7	2.22129	2.49832	2.41914	0.182958	0.545925	0.76326	0.317562	0.482821	0.185189	1.48214e-07	-2.56993	down	--	--	--	--	--	--	--	--	--	S	Function unknown	protein PELPK1-like [Solanum pennellii]
gene.Soltu.DM.05G023380.1	322	281	230	69	53	48	105	131	112	5.84606	4.52119	3.8746	1.10643	0.956607	0.77808	1.76344	2.1745	2.10418	8.18104e-05	-1.73448	down	--	--	Molecular Function: UDP-glycosyltransferase activity (GO:0008194);;	K13495|2.0e-264|spen:107020926|K13495 cis-zeatin O-glucosyltransferase [EC:2.4.1.215] | (RefSeq) zeatin O-xylosyltransferase-like	Zeatin biosynthesis (ko00908)	[GC]	Carbohydrate transport and metabolism;; Energy production and conversion	UDP-glucoronosyl and UDP-glucosyl transferase	Zeatin O-xylosyltransferase OS=Phaseolus vulgaris OX=3885 GN=ZOX1 PE=2 SV=1	S	Function unknown	zeatin O-xylosyltransferase-like [Solanum pennellii]
Solanum_tuberosum_newGene_5323	20	11	11	46	40	59	33	26	54	0.278777	0.133257	0.135671	0.593084	0.577205	0.768247	0.43137	0.33942	0.808684	0.00400907	1.54642	up	--	--	--	--	--	--	--	--	--	--	--	PREDICTED: uncharacterized protein LOC102605937 [Solanum tuberosum]
gene.Soltu.DM.03G034030.1	3221	3627	3219	2017	1800	2053	1382	1433	1194	65.7844	65.752	61.1989	36.6441	37.0702	38.1626	26.1509	26.9163	25.3192	2.57804e-14	-1.10187	down	--	--	Cellular Component: nucleus (GO:0005634);; Molecular Function: zinc ion binding (GO:0008270);;	K12135|1.1e-08|csat:104769830|K12135 zinc finger protein CONSTANS | (RefSeq) zinc finger protein CONSTANS-like	Circadian rhythm - plant (ko04712)	[K]	Transcription	CCT motif	Zinc finger protein CONSTANS-LIKE 16 OS=Arabidopsis thaliana OX=3702 GN=COL16 PE=1 SV=2	K	Transcription	PREDICTED: zinc finger protein CONSTANS-LIKE 16-like [Solanum tuberosum]
gene.Soltu.DM.08G027280.1	7229	6160	6066	16852	14955	16098	21191	20816	18540	218.915	165.592	170.995	454.055	456.827	443.74	594.769	580.002	583.214	1.56914e-16	1.41548	up	--	--	Biological Process: immune system process (GO:0002376);; Biological Process: response to stress (GO:0006950);; Biological Process: defense response (GO:0006952);; Biological Process: immune response (GO:0006955);; Biological Process: response to osmotic stress (GO:0006970);; Biological Process: biological_process (GO:0008150);; Biological Process: response to external stimulus (GO:0009605);; Biol…	K12173|8.2e-28|gmx:100794341|K12173 BRCA1-A complex subunit BRE | (RefSeq) BRISC and BRCA1-A complex member 2	Homologous recombination (ko03440)	--	--	Thaumatin family	Osmotin-like protein OSML13 OS=Solanum commersonii OX=4109 PE=2 SV=1	S	Function unknown	PREDICTED: osmotin-like protein OSML13 [Solanum tuberosum]
gene.Soltu.DM.03G012630.1	80	106	68	1115	785	893	600	633	745	2.94958	3.45947	2.31278	36.7773	29.3272	30.131	20.6195	21.5936	28.6652	4.08054e-50	3.16728	up	--	--	Biological Process: response to acid chemical (GO:0001101);; Molecular Function: protein binding (GO:0005515);; Cellular Component: cellular_component (GO:0005575);; Cellular Component: intracellular (GO:0005622);; Cellular Component: cell (GO:0005623);; Cellular Component: cytoplasm (GO:0005737);; Cellular Component: vacuole (GO:0005773);; Cellular Component: vacuolar membrane (GO:0005774);; Cel…	--	--	--	--	PLAT/LH2 domain	PLAT domain-containing protein 2 OS=Arabidopsis thaliana OX=3702 GN=PLAT2 PE=2 SV=1	--	--	PREDICTED: lipoxygenase homology domain-containing protein 1-like [Solanum tuberosum]
gene.Soltu.DM.03G025990.1	0	0	0	0	887	0	756	848	0	0	0	0	0	9.18751	0	7.19273	8.00421	0	8.65047e-11	24.3177	up	[L]	Replication, recombination and repair	Molecular Function: nucleic acid binding (GO:0003676);; Molecular Function: helicase activity (GO:0004386);; Molecular Function: ATP binding (GO:0005524);;	K12823|1.1e-296|sot:102578396|K12823 ATP-dependent RNA helicase DDX5/DBP2 [EC:3.6.4.13] | (RefSeq) DEAD-box ATP-dependent RNA helicase 20	Spliceosome (ko03040)	[A]	RNA processing and modification	DEAD/DEAH box helicase	DEAD-box ATP-dependent RNA helicase 30 OS=Arabidopsis thaliana OX=3702 GN=RH30 PE=1 SV=2	L	Replication, recombination and repair	PREDICTED: DEAD-box ATP-dependent RNA helicase 20 [Solanum tuberosum]
gene.Soltu.DM.08G028430.1	13	12	10	33	24	33	54	64	48	0.470054	0.399939	0.327257	1.08508	0.899236	1.12614	1.86056	2.21887	1.84541	0.00113352	1.81633	up	--	--	--	K03239|4.5e-15|rcu:8276560|K03239 translation initiation factor eIF-2B subunit alpha | (RefSeq) methylthioribose-1-phosphate isomerase	RNA transport (ko03013)	--	--	LURP-one-related	Protein LURP-one-related 17 OS=Arabidopsis thaliana OX=3702 GN=At5g41590 PE=2 SV=2	S	Function unknown	PREDICTED: protein LURP-one-related 8 isoform X1 [Solanum tuberosum]
gene.Soltu.DM.12G001210.1	186	214	156	809	832	924	774	886	852	3.92422	4.00541	3.0467	15.1864	17.6998	17.7427	15.1293	17.1989	18.668	4.60945e-60	2.13403	up	--	--	Cellular Component: integral component of membrane (GO:0016021);;	K14780|1.3e-106|dcr:108220614|K14780 ATP-dependent RNA helicase DHX37/DHR1 [EC:3.6.4.13] | (RefSeq) ATP-dependent RNA helicase DEAH13-like isoform X1	--	[G]	Carbohydrate transport and metabolism	Protein of unknown function, DUF604	--	S	Function unknown	PREDICTED: uncharacterized protein LOC102600818 [Solanum tuberosum]
gene.Soltu.DM.04G001000.1	12	16	16	18	66	68	38	49	58	0.344937	0.413746	0.44592	0.479469	1.99884	1.87329	1.06524	1.36066	1.82737	0.00548005	1.71447	up	--	--	Biological Process: defense response (GO:0006952);;	--	--	--	--	Pathogenesis-related protein Bet v 1 family	Kirola OS=Actinidia deliciosa OX=3627 PE=1 SV=1	--	--	PREDICTED: kirola-like [Solanum tuberosum]
gene.Soltu.DM.08G025480.1	26	16	15	35	57	61	49	58	39	1.0003	0.533549	0.534866	1.20627	2.26997	2.19322	1.78443	2.08198	1.60298	0.0026545	1.31713	up	--	--	--	K11855|4.1e-19|bvg:104906049|K11855 ubiquitin carboxyl-terminal hydrolase 36/42 [EC:3.4.19.12] | (RefSeq) ubiquitin carboxyl-terminal hydrolase 36	--	--	--	Hydrophobic seed protein	14 kDa proline-rich protein DC2.15 OS=Daucus carota OX=4039 PE=2 SV=1	S	Function unknown	14 kDa proline-rich protein DC2.15-like [Solanum lycopersicum]
gene.Soltu.DM.12G029100.1	12894	15261	14025	5882	4886	6136	6833	6224	5412	417.298	438.494	422.554	169.348	159.494	180.743	204.964	185.332	181.938	6.52079e-37	-1.31391	down	--	--	Cellular Component: photosystem I (GO:0009522);; Cellular Component: photosystem II (GO:0009523);; Cellular Component: chloroplast thylakoid membrane (GO:0009535);; Biological Process: photosynthesis, light harvesting (GO:0009765);; Cellular Component: integral component of membrane (GO:0016021);; Molecular Function: chlorophyll binding (GO:0016168);; Biological Process: protein-chromophore linka…	K08914|1.6e-154|sot:102586284|K08914 light-harvesting complex II chlorophyll a/b binding protein 3 | (RefSeq) chlorophyll a-b binding protein 13, chloroplastic	Photosynthesis - antenna proteins (ko00196)	--	--	Chlorophyll A-B binding protein	Chlorophyll a-b binding protein 13, chloroplastic OS=Solanum lycopersicum OX=4081 GN=CAB13 PE=1 SV=1	S	Function unknown	PREDICTED: chlorophyll a-b binding protein 13, chloroplastic [Solanum tuberosum]
gene.Soltu.DM.04G034720.1	221	267	229	525	418	461	519	619	538	6.70503	7.20653	6.48129	14.2182	12.8227	12.7761	14.6382	17.3244	17.0001	1.4766e-09	1.04782	up	--	--	Cellular Component: integral component of membrane (GO:0016021);;	--	--	--	--	Uncharacterized protein family, UPF0114	--	S	Function unknown	PREDICTED: uncharacterized protein LOC102589987 [Solanum tuberosum]
gene.Soltu.DM.01G037590.1	76	55	53	131	120	142	135	135	144	1.84046	1.19728	1.19439	2.84862	2.95348	3.15056	3.06096	3.03178	3.65004	1.36461e-05	1.0658	up	[I]	Lipid transport and metabolism	Molecular Function: hydrolase activity (GO:0016787);;	K22097|2.3e-65|psom:113323289|K22097 3-O-acetylpapaveroxine carboxylesterase [EC:3.1.1.105] | (RefSeq) carboxylesterase 1-like	Isoquinoline alkaloid biosynthesis (ko00950)	[V]	Defense mechanisms	alpha/beta hydrolase fold	Carboxylesterase 1 OS=Actinidia eriantha OX=165200 GN=CXE1 PE=1 SV=1	I	Lipid transport and metabolism	PREDICTED: carboxylesterase 1-like [Solanum tuberosum]
gene.Soltu.DM.10G014420.1	178	434	161	29	30	39	0	8	7	9.39414	20.3238	7.89441	1.33949	1.57641	1.85097	0	0.358663	0.364723	6.62341e-05	-3.84402	down	[S]	Function unknown	Cellular Component: extracellular space (GO:0005615);;	K13449|9.7e-88|sot:102595771|K13449 pathogenesis-related protein 1 | (RefSeq) pathogenesis-related protein 1C-like	MAPK signaling pathway - plant (ko04016);; Plant hormone signal transduction (ko04075);; Plant-pathogen interaction (ko04626)	[S]	Function unknown	Cysteine-rich secretory protein family	Pathogenesis-related protein 1C OS=Nicotiana tabacum OX=4097 PE=2 SV=3	S	Function unknown	PREDICTED: pathogenesis-related protein 1C-like, partial [Solanum tuberosum]
gene.Soltu.DM.10G024060.1	16	14	14	49	38	38	63	152	115	0.502505	0.387511	0.399691	1.34653	1.2002	1.08644	1.82621	4.40376	3.76	0.000774394	2.32899	up	[T]	Signal transduction mechanisms	Molecular Function: protein serine/threonine kinase activity (GO:0004674);; Molecular Function: ATP binding (GO:0005524);;	K01180|5.7e-48|cmax:111487562|K01180 endo-1,3(4)-beta-glucanase [EC:3.2.1.6] | (RefSeq) uncharacterized protein LOC111487562	--	[T]	Signal transduction mechanisms	Protein kinase domain	Cold-responsive protein kinase 1 OS=Arabidopsis thaliana OX=3702 GN=CRPK1 PE=1 SV=1	T	Signal transduction mechanisms	PREDICTED: putative serine/threonine-protein kinase [Solanum tuberosum]
gene.Soltu.DM.04G003970.1	51	64	43	26	32	22	14	16	11	0.998943	1.10744	0.774676	0.442801	0.635351	0.37972	0.241811	0.285053	0.224817	0.00151265	-1.45239	down	--	--	Molecular Function: UDP-glycosyltransferase activity (GO:0008194);;	K13495|4.1e-222|spen:107017809|K13495 cis-zeatin O-glucosyltransferase [EC:2.4.1.215] | (RefSeq) zeatin O-glucosyltransferase-like	Zeatin biosynthesis (ko00908)	[GC]	Carbohydrate transport and metabolism;; Energy production and conversion	UDP-glucoronosyl and UDP-glucosyl transferase	Zeatin O-glucosyltransferase OS=Phaseolus lunatus OX=3884 GN=ZOG1 PE=2 SV=1	S	Function unknown	zeatin O-glucosyltransferase-like [Solanum pennellii]
gene.Soltu.DM.08G014400.1	151	234	176	524	504	508	244	289	316	3.61737	4.99275	3.94815	11.218	12.2327	11.1275	5.4294	6.39325	7.90517	0.00144417	1.02469	up	[E]	Amino acid transport and metabolism	Molecular Function: carboxy-lyase activity (GO:0016831);; Biological Process: carboxylic acid metabolic process (GO:0019752);; Molecular Function: pyridoxal phosphate binding (GO:0030170);;	K22427|2.7e-239|sly:101248599|K22427 phenylalanine decarboxylase [EC:4.1.1.53] | (RefSeq) histidine decarboxylase-like	Phenylalanine metabolism (ko00360)	[E]	Amino acid transport and metabolism	Pyridoxal-dependent decarboxylase conserved domain	Histidine decarboxylase OS=Solanum lycopersicum OX=4081 GN=HDC PE=2 SV=1	E	Amino acid transport and metabolism	histidine decarboxylase-like [Solanum lycopersicum]
gene.Soltu.DM.09G002960.4	46	44	42	67	70	164	222	243	101	1.05812	0.88705	0.893894	1.3579	1.60629	3.41882	4.7157	5.1431	2.39971	0.00452326	1.64763	up	[Q]	Secondary metabolites biosynthesis, transport and catabolism	Molecular Function: oxidoreductase activity (GO:0016491);; Molecular Function: metal ion binding (GO:0046872);;	K13229|1.8e-90|ats:109766943|K13229 2,4-dihydroxy-1,4-benzoxazin-3-one-glucoside dioxygenase [EC:1.14.11.59] | (RefSeq) LOC109766943; DIBOA-glucoside dioxygenase BX6-like	Benzoxazinoid biosynthesis (ko00402)	[QR]	Secondary metabolites biosynthesis, transport and catabolism;; General function prediction only	2OG-Fe(II) oxygenase superfamily	1-aminocyclopropane-1-carboxylate oxidase homolog 1 OS=Arabidopsis thaliana OX=3702 GN=At1g06620 PE=2 SV=1	S	Function unknown	PREDICTED: 1-aminocyclopropane-1-carboxylate oxidase homolog 1-like isoform X1 [Solanum tuberosum]
Solanum_tuberosum_newGene_5302	13	17	8	83	63	86	61	107	83	0.198918	0.238368	0.119081	1.2052	1.04451	1.28907	0.924163	1.61613	1.41908	4.32484e-12	2.60985	up	--	--	--	K03260|4.44e-89|cann:107844414|K03260 translation initiation factor 4G | (RefSeq) uncharacterized LOC107844414	RNA transport (ko03013)	[R]	General function prediction only	gag-polypeptide of LTR copia-type	--	L	Replication, recombination and repair	PREDICTED: uncharacterized protein LOC102600866 [Solanum tuberosum]
gene.Soltu.DM.02G033820.1	235	191	204	448	359	481	443	567	447	3.34294	2.40436	2.69791	5.67587	5.15486	6.22281	5.83752	7.42288	6.60756	3.41347e-08	1.0523	up	[M]	Cell wall/membrane/envelope biogenesis	Molecular Function: transferase activity, transferring glycosyl groups (GO:0016757);;	K23869|4.0e-06|cme:CYME_CMJ303C|K23869 galactan beta-1,4-galactosyltransferase [EC:2.4.1.-] | (RefSeq) hypothetical protein	--	--	--	Glycosyltransferase family 92	Glycosyltransferase family 92 protein RCOM_0530710 OS=Ricinus communis OX=3988 GN=RCOM_0530710 PE=3 SV=1	M	Cell wall/membrane/envelope biogenesis	PREDICTED: UPF0392 protein RCOM_0530710-like [Solanum tuberosum]
Solanum_tuberosum_newGene_1263	19	14	17	162	110	104	69	75	54	1.37794	0.885492	1.10989	10.6878	8.1813	7.02391	4.73056	5.09424	4.11277	1.65959e-08	2.42556	up	--	--	--	--	--	--	--	--	--	--	--	PREDICTED: uncharacterized protein LOC107063523 [Solanum tuberosum]
gene.Soltu.DM.08G006330.1	3	0	4	81	69	86	38	40	44	0.128901	0	0.144639	3.67217	3.54848	3.98934	1.77281	1.88831	2.34729	4.00994e-10	4.58377	up	--	--	--	K11498|8.2e-25|cann:107867260|K11498 centromeric protein E | (RefSeq) kinesin-related protein 11	--	[Z]	Cytoskeleton	--	Kinesin-like protein KIN-7N OS=Arabidopsis thaliana OX=3702 GN=KIN7N PE=2 SV=1	Z	Cytoskeleton	PREDICTED: kinesin-related protein 11 [Capsicum annuum]
gene.Soltu.DM.09G001300.1	298	257	267	711	707	735	964	1049	985	9.7958	7.51727	8.19146	20.8441	23.5114	22.0444	29.4517	31.8001	33.728	7.45004e-12	1.59119	up	[O]	Posttranslational modification, protein turnover, chaperones	Biological Process: response to acid chemical (GO:0001101);; Molecular Function: molecular_function (GO:0003674);; Molecular Function: catalytic activity (GO:0003824);; Molecular Function: glutathione transferase activity (GO:0004364);; Molecular Function: protein binding (GO:0005515);; Cellular Component: cellular_component (GO:0005575);; Cellular Component: intracellular (GO:0005622);; Cellular…	K00799|8.3e-125|sot:102600687|K00799 glutathione S-transferase [EC:2.5.1.18] | (RefSeq) probable glutathione S-transferase	Glutathione metabolism (ko00480)	[O]	Posttranslational modification, protein turnover, chaperones	Glutathione S-transferase, N-terminal domain	Probable glutathione S-transferase OS=Nicotiana tabacum OX=4097 PE=2 SV=1	O	Posttranslational modification, protein turnover, chaperones	PREDICTED: probable glutathione S-transferase [Solanum tuberosum]
gene.Soltu.DM.05G003980.2	285	273	337	165	99	107	130	181	108	11.5862	9.86412	12.7582	5.95121	4.03586	3.96361	4.9011	6.75609	4.54323	3.50053e-07	-1.2558	down	[E]	Amino acid transport and metabolism	Biological Process: amino acid transport (GO:0006865);; Cellular Component: integral component of membrane (GO:0016021);; Molecular Function: transmembrane transporter activity (GO:0022857);;	K19564|8.2e-14|qsu:111984493|K19564 choline transport protein | (RefSeq) choline transport protein-like	--	[E]	Amino acid transport and metabolism	Amino acid permease	Amino-acid permease BAT1 homolog OS=Oryza sativa subsp. japonica OX=39947 GN=BAT1 PE=2 SV=1	E	Amino acid transport and metabolism	PREDICTED: amino-acid permease BAT1 homolog isoform X1 [Solanum tuberosum]
gene.Soltu.DM.06G028930.1	579	653	702	260	236	312	252	261	251	14.3848	14.4142	16.238	5.74995	5.91091	7.05901	5.80414	5.95886	6.47171	8.3106e-32	-1.36344	down	--	--	Molecular Function: cysteine-type endopeptidase inhibitor activity (GO:0004869);;	--	--	--	--	Cystatin domain	Multicystatin OS=Solanum tuberosum OX=4113 PE=1 SV=1	S	Function unknown	RecName: Full=Multicystatin; Short=MC [Solanum tuberosum]
gene.Soltu.DM.11G001310.1	3	2	1	36	33	34	30	29	16	0.098323	0.066767	0.035242	1.21955	1.25046	1.14986	1.05105	0.984863	0.594568	5.72299e-07	3.81336	up	--	--	Molecular Function: DNA binding (GO:0003677);; Molecular Function: transcription factor activity, sequence-specific DNA binding (GO:0003700);; Cellular Component: nucleus (GO:0005634);;	K14516|8.1e-94|sot:107061527|K14516 ethylene-responsive transcription factor 1 | (RefSeq) ethylene-responsive transcription factor 1B-like	MAPK signaling pathway - plant (ko04016);; Plant hormone signal transduction (ko04075)	--	--	AP2 domain	Ethylene-responsive transcription factor 1B OS=Arabidopsis thaliana OX=3702 GN=ERF1B PE=1 SV=2	K	Transcription	PREDICTED: ethylene-responsive transcription factor 1B-like [Solanum tuberosum]
gene.Soltu.DM.01G028050.1	44	70	62	229	210	162	188	201	149	0.569101	0.810953	0.757727	2.66784	2.78405	1.93603	2.28546	2.42216	2.0272	1.07229e-14	1.63459	up	--	--	Biological Process: fucose metabolic process (GO:0006004);; Cellular Component: integral component of membrane (GO:0016021);; Molecular Function: transferase activity, transferring glycosyl groups (GO:0016757);;	K23280|1.8e-62|smo:SELMODRAFT_148957|K23280 rhamnogalacturonan I rhamnosyltransferase [EC:2.4.1.351] | (RefSeq) hypothetical protein	--	--	--	GDP-fucose protein O-fucosyltransferase	O-fucosyltransferase 20 OS=Arabidopsis thaliana OX=3702 GN=OFUT20 PE=1 SV=1	S	Function unknown	PREDICTED: uncharacterized protein At1g04910-like [Solanum tuberosum]
gene.Soltu.DM.12G023640.1	4013	4479	4231	1124	971	1058	1792	1590	1398	122.699	121.577	120.421	30.5639	29.9478	29.4462	50.7823	44.7253	44.3992	7.85858e-14	-1.73199	down	--	--	Cellular Component: photosystem I (GO:0009522);; Cellular Component: photosystem II (GO:0009523);; Cellular Component: chloroplast thylakoid membrane (GO:0009535);; Biological Process: photosynthesis, light harvesting (GO:0009765);; Cellular Component: integral component of membrane (GO:0016021);; Molecular Function: chlorophyll binding (GO:0016168);; Biological Process: protein-chromophore linka…	K08913|7.2e-155|sot:102606321|K08913 light-harvesting complex II chlorophyll a/b binding protein 2 | (RefSeq) chlorophyll a-b binding protein 5, chloroplastic	Photosynthesis - antenna proteins (ko00196)	--	--	Chlorophyll A-B binding protein	Chlorophyll a-b binding protein 37, chloroplastic OS=Petunia sp. OX=4104 GN=CAB37 PE=3 SV=1	J	Translation, ribosomal structure and biogenesis	PREDICTED: chlorophyll a-b binding protein 5, chloroplastic [Solanum tuberosum]
gene.Soltu.DM.03G025660.1	15	21	9	217	188	237	297	302	251	0.547162	0.697817	0.30953	7.23021	7.10421	8.06235	10.3037	10.3982	9.74247	1.36871e-34	4.00163	up	--	--	Biological Process: response to nitrate (GO:0010167);; Biological Process: nitrate transport (GO:0015706);; Cellular Component: integral component of membrane (GO:0016021);;	--	--	--	--	High-affinity nitrate transporter accessory	High-affinity nitrate transporter 3.2 OS=Arabidopsis thaliana OX=3702 GN=NRT3.2 PE=2 SV=1	P	Inorganic ion transport and metabolism	PREDICTED: high-affinity nitrate transporter 3.2-like [Solanum tuberosum]
gene.Soltu.DM.07G014150.1	8572	9211	8379	2601	2169	2613	3046	3600	2840	116.888	111.505	106.369	31.5553	29.8343	32.4257	38.494	45.1644	40.2232	1.42221e-25	-1.69137	down	[N]	Cell motility	Cellular Component: integral component of membrane (GO:0016021);; Molecular Function: cellulose synthase (UDP-forming) activity (GO:0016760);; Biological Process: cellulose biosynthetic process (GO:0030244);; Biological Process: cell wall organization (GO:0071555);;	K10999|5.4e-88|egr:104436023|K10999 cellulose synthase A [EC:2.4.1.12] | (RefSeq) cellulose synthase A catalytic subunit 7 [UDP-forming]-like	--	--	--	Cellulose synthase	Cellulose synthase-like protein G1 OS=Arabidopsis thaliana OX=3702 GN=CSLG1 PE=2 SV=1	M	Cell wall/membrane/envelope biogenesis	PREDICTED: cellulose synthase-like protein G1 [Solanum tuberosum]
gene.Soltu.DM.08G018780.1	16	4	38	52	69	31	598	710	564	0.285915	0.06619	0.643734	0.858153	1.28598	0.518591	10.3148	12.176	10.9145	0.00433469	4.08271	up	[QV]	Secondary metabolites biosynthesis, transport and catabolism;; Defense mechanisms	Molecular Function: monooxygenase activity (GO:0004497);; Molecular Function: iron ion binding (GO:0005506);; Cellular Component: integral component of membrane (GO:0016021);; Molecular Function: oxidoreductase activity, acting on paired donors, with incorporation or reduction of molecular oxygen (GO:0016705);; Molecular Function: heme binding (GO:0020037);;	K15472|9.2e-175|sot:102603857|K15472 premnaspirodiene oxygenase [EC:1.14.14.151] | (RefSeq) CYP71D4; premnaspirodiene oxygenase	Sesquiterpenoid and triterpenoid biosynthesis (ko00909)	[Q]	Secondary metabolites biosynthesis, transport and catabolism	Cytochrome P450	Premnaspirodiene oxygenase OS=Hyoscyamus muticus OX=35626 GN=CYP71D55 PE=1 SV=1	Q	Secondary metabolites biosynthesis, transport and catabolism	PREDICTED: premnaspirodiene oxygenase-like [Solanum tuberosum]
gene.Soltu.DM.02G026060.1	2054	2642	2336	911	819	1003	1277	1223	1121	50.8159	58.0471	53.8175	20.0468	20.4332	22.5918	29.2751	27.8416	28.8021	2.30366e-10	-1.19495	down	[I]	Lipid transport and metabolism	Molecular Function: iron ion binding (GO:0005506);; Biological Process: lipid biosynthetic process (GO:0008610);; Cellular Component: integral component of membrane (GO:0016021);; Molecular Function: oxidoreductase activity (GO:0016491);;	K00227|7.9e-165|sot:102587419|K00227 Delta7-sterol 5-desaturase [EC:1.14.19.20] | (RefSeq) delta(7)-sterol-C5(6)-desaturase	Steroid biosynthesis (ko00100)	[I]	Lipid transport and metabolism	Fatty acid hydroxylase superfamily	Delta(7)-sterol-C5(6)-desaturase OS=Nicotiana tabacum OX=4097 PE=2 SV=1	I	Lipid transport and metabolism	PREDICTED: delta(7)-sterol-C5(6)-desaturase [Solanum tuberosum]
gene.Soltu.DM.09G007060.1	81	60	35	98	221	106	850	708	936	5.19194	3.37965	2.04743	5.57545	14.3206	6.1694	50.6083	41.8483	62.4566	0.00437375	3.04166	up	[S]	Function unknown	Cellular Component: extracellular region (GO:0005576);;	K13449|5.9e-82|sot:102599796|K13449 pathogenesis-related protein 1 | (RefSeq) pathogenesis-related leaf protein 4	MAPK signaling pathway - plant (ko04016);; Plant hormone signal transduction (ko04075);; Plant-pathogen interaction (ko04626)	[S]	Function unknown	Cysteine-rich secretory protein family	Pathogenesis-related leaf protein 4 OS=Solanum lycopersicum OX=4081 PE=2 SV=1	S	Function unknown	pathogenesis related protein isoform b2 [Solanum phureja]
gene.Soltu.DM.08G017230.1	1892	2175	2069	835	678	746	1395	1455	1214	94.311	96.2252	95.9908	37.0344	34.0671	33.809	64.4163	66.735	62.8288	0.0033924	-1.00207	down	--	--	--	K12472|4.4e-22|bvg:104885038|K12472 epidermal growth factor receptor substrate 15 | (RefSeq) filaggrin-like	Endocytosis (ko04144)	--	--	BURP domain	BURP domain-containing protein 3 OS=Oryza sativa subsp. japonica OX=39947 GN=BURP3 PE=2 SV=1	--	--	PREDICTED: BURP domain-containing protein 3-like [Solanum tuberosum]
gene.Soltu.DM.03G032420.1	32	39	42	94	76	92	83	73	93	0.793227	0.8569	0.967001	2.07909	1.882	2.06156	1.89187	1.66348	2.38023	2.04946e-05	1.11758	up	--	--	Molecular Function: DNA binding (GO:0003677);; Cellular Component: nucleus (GO:0005634);; Biological Process: regulation of transcription, DNA-templated (GO:0006355);;	--	--	--	--	DNA Binding Domain (C-terminal) Leafy/Floricaula	Protein ALF OS=Petunia hybrida OX=4102 GN=ALF PE=2 SV=1	K	Transcription	FLORICAULA/LEAFY-like protein [Solanum lycopersicum]
Solanum_tuberosum_newGene_1957	164	186	224	36	20	23	24	41	28	3.29154	3.32574	4.20096	0.642841	0.403542	0.414056	0.443402	0.751109	0.585204	7.64228e-24	-2.80641	down	--	--	Molecular Function: protein binding (GO:0005515);;	--	--	--	--	--	Putative F-box protein At3g58860 OS=Arabidopsis thaliana OX=3702 GN=At3g58860 PE=4 SV=1	S	Function unknown	hypothetical protein CQW23_02364 [Capsicum baccatum]
gene.Soltu.DM.11G021200.1	26	18	15	41	31	52	120	71	89	0.49292	0.307364	0.264296	0.698414	0.603184	0.905291	2.15287	1.26565	1.78683	0.00896327	1.72677	up	--	--	Cellular Component: integral component of membrane (GO:0016021);;	K15015|3.7e-10|ini:109182213|K15015 solute carrier family 32 (vesicular inhibitory amino acid transporter) | (RefSeq) amino acid transporter ANTL1	--	[E]	Amino acid transport and metabolism	Transmembrane amino acid transporter protein	GABA transporter 1 OS=Arabidopsis thaliana OX=3702 GN=GAT1 PE=1 SV=1	E	Amino acid transport and metabolism	PREDICTED: GABA transporter 1-like [Solanum tuberosum]
gene.Soltu.DM.09G025630.1	100	98	69	275	228	168	202	242	203	1.44077	1.24516	0.920173	3.51724	3.30887	2.20231	2.69292	3.19647	3.03811	1.34212e-07	1.23921	up	[M]	Cell wall/membrane/envelope biogenesis	Molecular Function: protein kinase activity (GO:0004672);; Molecular Function: ATP binding (GO:0005524);; Cellular Component: integral component of membrane (GO:0016021);;	K13429|1.1e-60|ccaj:109804580|K13429 chitin elicitor receptor kinase 1 | (RefSeq) lysM domain receptor-like kinase 3	Plant-pathogen interaction (ko04626)	--	--	Protein kinase domain	Serine/threonine receptor-like kinase NFP OS=Medicago truncatula OX=3880 GN=NFP PE=1 SV=1	T	Signal transduction mechanisms	PREDICTED: lysM domain receptor-like kinase 4 [Solanum tuberosum]
gene.Soltu.DM.03G026390.1	31	27	49	279	187	226	241	324	186	0.611307	0.478944	0.90758	4.97797	3.78204	4.12279	4.47264	5.96764	3.87179	4.69279e-22	2.67522	up	--	--	--	--	--	--	--	Protein of unknown function (DUF1645)	--	S	Function unknown	PREDICTED: uncharacterized protein LOC102596181 [Solanum tuberosum]
gene.Soltu.DM.11G002050.1	34	14	35	76	53	60	77	78	60	1.52091	0.532746	1.41921	3.00603	2.35601	2.41764	3.18931	3.20322	2.7847	0.00552044	1.19681	up	[G]	Carbohydrate transport and metabolism	Molecular Function: zinc ion binding (GO:0008270);; Molecular Function: oxidoreductase activity (GO:0016491);;	K23232|2.8e-110|nau:109215604|K23232 8-hydroxygeraniol dehydrogenase [EC:1.1.1.324] | (RefSeq) 8-hydroxygeraniol dehydrogenase-like	Monoterpenoid biosynthesis (ko00902)	[Q]	Secondary metabolites biosynthesis, transport and catabolism	Alcohol dehydrogenase GroES-like domain	8-hydroxygeraniol dehydrogenase OS=Catharanthus roseus OX=4058 GN=10HGO PE=1 SV=1	C	Energy production and conversion	PREDICTED: 8-hydroxygeraniol dehydrogenase-like [Solanum tuberosum]
gene.Soltu.DM.05G020000.1	18	27	25	76	79	77	57	78	61	0.411936	0.552876	0.539385	1.55783	1.84854	1.62209	1.21262	1.65487	1.45652	5.77471e-08	1.55056	up	--	--	Molecular Function: transcription factor activity, sequence-specific DNA binding (GO:0003700);; Cellular Component: nucleus (GO:0005634);; Molecular Function: sequence-specific DNA binding (GO:0043565);;	K13459|2.9e-11|bvg:104889681|K13459 disease resistance protein RPS2 | (RefSeq) disease resistance protein At4g27190	Plant-pathogen interaction (ko04626)	--	--	WRKY DNA -binding domain	Probable WRKY transcription factor 41 OS=Arabidopsis thaliana OX=3702 GN=WRKY41 PE=1 SV=2	--	--	PREDICTED: probable WRKY transcription factor 41 [Solanum tuberosum]
gene.Soltu.DM.03G019440.1	666	656	575	262	231	248	424	408	367	14.2289	12.4467	11.4362	4.97355	4.97311	4.82192	8.38937	8.023	8.13107	0.00107092	-1.01869	down	[T]	Signal transduction mechanisms	Molecular Function: acid phosphatase activity (GO:0003993);; Molecular Function: metal ion binding (GO:0046872);;	K14379|1.0e-190|sot:102601357|K14379 tartrate-resistant acid phosphatase type 5 [EC:3.1.3.2] | (RefSeq) purple acid phosphatase 17-like	Riboflavin metabolism (ko00740)	[O]	Posttranslational modification, protein turnover, chaperones	Calcineurin-like phosphoesterase	Purple acid phosphatase 17 OS=Arabidopsis thaliana OX=3702 GN=PAP17 PE=2 SV=1	S	Function unknown	PREDICTED: purple acid phosphatase 17-like [Solanum tuberosum]
gene.Soltu.DM.01G043050.1	590	723	709	385	431	432	246	229	270	11.9104	12.9579	13.3238	6.91016	8.76332	7.92852	4.59135	4.24422	5.64987	2.02998e-05	-1.08803	down	--	--	Molecular Function: nutrient reservoir activity (GO:0045735);;	--	--	--	--	Cupin	13S globulin seed storage protein 1 OS=Fagopyrum esculentum OX=3617 GN=FA02 PE=2 SV=1	S	Function unknown	PREDICTED: 12S seed storage protein CRD-like [Solanum tuberosum]
gene.Soltu.DM.01G031910.3	244	178	252	131	132	80	123	116	120	6.87348	4.46275	6.61678	3.27653	3.74388	2.04672	3.21343	3.01486	3.51033	0.000581171	-1.00953	down	--	--	--	K15198|5.8e-29|sbi:8069083|K15198 transcription factor TFIIIB component B'' | (RefSeq) uncharacterized protein LOC8069083 isoform X1	--	--	--	Myelodysplasia-myeloid leukemia factor 1-interacting protein	--	--	--	PREDICTED: uncharacterized protein LOC102598618 [Solanum tuberosum]
gene.Soltu.DM.04G036030.1	363	906	521	1492	1174	1278	1484	1367	940	7.46226	16.5327	9.9761	27.3058	24.355	23.92	28.2767	25.8691	20.0666	1.81175e-05	1.06887	up	[GER]	Carbohydrate transport and metabolism;; Amino acid transport and metabolism;; General function prediction only	Cellular Component: integral component of membrane (GO:0016021);; Molecular Function: transmembrane transporter activity (GO:0022857);;	K17500|1.4e-114|nto:104085001|K17500 integrin-linked kinase-associated serine/threonine phosphatase 2C [EC:3.1.3.16] | (RefSeq) WAT1-related protein At3g18200 isoform X1	--	--	--	EamA-like transporter family	Protein WALLS ARE THIN 1 OS=Arabidopsis thaliana OX=3702 GN=WAT1 PE=1 SV=1	S	Function unknown	PREDICTED: protein WALLS ARE THIN 1 [Solanum tuberosum]
gene.Soltu.DM.01G044740.1	325	345	316	146	106	118	98	132	142	4.78462	4.51882	4.33955	1.9111	1.56525	1.57475	1.32832	1.78761	2.16509	5.94626e-16	-1.47167	down	[L]	Replication, recombination and repair	Molecular Function: DNA binding (GO:0003677);; Molecular Function: helicase activity (GO:0004386);; Molecular Function: ATP binding (GO:0005524);; Biological Process: DNA replication initiation (GO:0006270);;	K10738|0.0e+00|sot:102601275|K10738 DNA helicase MCM9 [EC:3.6.4.12] | (RefSeq) probable DNA helicase MCM9	--	[L]	Replication, recombination and repair	MCM P-loop domain	Probable DNA helicase MCM9 OS=Arabidopsis thaliana OX=3702 GN=MCM9 PE=3 SV=1	L	Replication, recombination and repair	PREDICTED: probable DNA helicase MCM9 isoform X1 [Solanum tuberosum]
gene.Soltu.DM.09G023920.1	48	42	52	16	10	29	11	22	22	2.00822	1.54652	2.02543	0.60121	0.390561	1.08853	0.397806	0.843867	0.947357	0.00428999	-1.44139	down	--	--	Biological Process: regulation of transcription, DNA-templated (GO:0006355);; Molecular Function: zinc ion binding (GO:0008270);; Molecular Function: sequence-specific DNA binding (GO:0043565);;	K09184|9.1e-08|dcr:108218750|K09184 GATA-binding protein, other eukaryote | (RefSeq) GATA transcription factor 8-like isoform X1	--	[K]	Transcription	GATA zinc finger	GATA transcription factor 15 OS=Arabidopsis thaliana OX=3702 GN=GATA15 PE=2 SV=2	K	Transcription	PREDICTED: GATA transcription factor 23-like [Solanum tuberosum]
gene.Soltu.DM.01G008160.1	32	31	35	127	84	73	54	63	51	0.784034	0.680797	0.805388	2.79579	2.08723	1.6273	1.24089	1.42512	1.30136	0.00600816	1.12084	up	[G]	Carbohydrate transport and metabolism	Biological Process: carbohydrate metabolic process (GO:0005975);; Biological Process: pentose-phosphate shunt (GO:0006098);; Molecular Function: 6-phosphogluconolactonase activity (GO:0017057);;	K01057|3.5e-149|sot:102605174|K01057 6-phosphogluconolactonase [EC:3.1.1.31] | (RefSeq) probable 6-phosphogluconolactonase 2	Pentose phosphate pathway (ko00030);; Carbon metabolism (ko01200)	[G]	Carbohydrate transport and metabolism	Glucosamine-6-phosphate isomerases/6-phosphogluconolactonase	Probable 6-phosphogluconolactonase 2 OS=Oryza sativa subsp. indica OX=39946 GN=OsI_025867 PE=3 SV=1	G	Carbohydrate transport and metabolism	PREDICTED: probable 6-phosphogluconolactonase 2 [Solanum tuberosum]
gene.Soltu.DM.03G018200.1	36	35	22	49	60	63	438	684	587	0.584922	0.50292	0.323586	0.706728	0.987939	0.928688	6.63423	10.2944	9.97594	0.0065748	3.32964	up	[V]	Defense mechanisms	Molecular Function: antiporter activity (GO:0015297);; Cellular Component: integral component of membrane (GO:0016021);; Molecular Function: xenobiotic transporter activity (GO:0042910);;	K03327|4.1e-284|sot:102585959|K03327 multidrug resistance protein, MATE family | (RefSeq) protein DETOXIFICATION 35-like	--	[R]	General function prediction only	MatE	Protein DETOXIFICATION 35 OS=Arabidopsis thaliana OX=3702 GN=DTX35 PE=1 SV=1	V	Defense mechanisms	PREDICTED: protein DETOXIFICATION 35-like [Solanum tuberosum]
gene.Soltu.DM.10G016240.1	206	198	216	135	136	132	54	90	64	13.5117	11.5371	13.1673	7.89123	8.99911	7.88055	3.25937	5.39506	4.36142	0.00296733	-1.10649	down	--	--	Molecular Function: transcription factor activity, sequence-specific DNA binding (GO:0003700);;	--	--	--	--	bZIP transcription factor	bZIP transcription factor 44 OS=Arabidopsis thaliana OX=3702 GN=BZIP44 PE=1 SV=1	--	--	hypothetical protein EJD97_010283 [Solanum chilense]
gene.Soltu.DM.01G050210.2	44867	51203	47261	18694	15373	18616	31202	29260	25396	851.335	862.551	834.817	315.591	294.242	321.518	548.734	510.837	500.562	5.41779e-05	-1.09708	down	[G]	Carbohydrate transport and metabolism	Molecular Function: fructose-bisphosphate aldolase activity (GO:0004332);; Biological Process: glycolytic process (GO:0006096);;	K01623|6.4e-224|sly:101246870|K01623 fructose-bisphosphate aldolase, class I [EC:4.1.2.13] | (RefSeq) SlFBA1; fructose 1,6-bisphosphate aldolase 1	Glycolysis / Gluconeogenesis (ko00010);; Pentose phosphate pathway (ko00030);; Fructose and mannose metabolism (ko00051);; Carbon fixation in photosynthetic organisms (ko00710);; Carbon metabolism (ko01200);; Biosynthesis of amino acids (ko01230)	[G]	Carbohydrate transport and metabolism	Fructose-bisphosphate aldolase class-I	Fructose-bisphosphate aldolase 2, chloroplastic OS=Arabidopsis thaliana OX=3702 GN=FBA2 PE=1 SV=2	G	Carbohydrate transport and metabolism	fructose-bisphosphate aldolase 1 [Solanum lycopersicum]
gene.Soltu.DM.06G000380.1	560	584	557	1044	851	986	1396	1561	1348	2.92298	2.70765	2.70484	4.85195	4.48344	4.68657	6.75669	7.50359	7.31211	6.22301e-05	1.02604	up	[V]	Defense mechanisms	Molecular Function: ATP binding (GO:0005524);; Cellular Component: integral component of membrane (GO:0016021);; Molecular Function: ATPase activity (GO:0016887);; Molecular Function: ATPase activity, coupled to transmembrane movement of substances (GO:0042626);;	K05658|0.0e+00|sot:102590445|K05658 ATP-binding cassette, subfamily B (MDR/TAP), member 1 [EC:7.6.2.2] | (RefSeq) ABC transporter B family member 11-like	ABC transporters (ko02010)	[Q]	Secondary metabolites biosynthesis, transport and catabolism	ABC transporter transmembrane region	ABC transporter B family member 11 OS=Arabidopsis thaliana OX=3702 GN=ABCB11 PE=2 SV=1	V	Defense mechanisms	hypothetical protein PRUPE_1G103900 [Prunus persica]
gene.Soltu.DM.11G015860.3	42	37	28	601	112	47	201	207	292	0.452581	0.350073	0.273806	5.81329	1.22517	0.457054	2.01986	2.06636	3.28815	0.000235079	2.68975	up	[S]	Function unknown	Molecular Function: glucosylceramidase activity (GO:0004348);; Biological Process: glucosylceramide catabolic process (GO:0006680);; Cellular Component: membrane (GO:0016020);;	K17108|0.0e+00|sot:102584095|K17108 non-lysosomal glucosylceramidase [EC:3.2.1.45] | (RefSeq) non-lysosomal glucosylceramidase	Other glycan degradation (ko00511);; Sphingolipid metabolism (ko00600)	[G]	Carbohydrate transport and metabolism	Glycosyl-hydrolase family 116, catalytic region	--	G	Carbohydrate transport and metabolism	PREDICTED: non-lysosomal glucosylceramidase isoform X2 [Solanum tuberosum]
gene.Soltu.DM.11G018650.1	250	298	293	848	766	765	553	686	627	4.80429	5.08507	5.24618	14.5096	14.8697	13.406	9.86038	12.1407	12.5381	3.0339e-21	1.26969	up	[T]	Signal transduction mechanisms	Molecular Function: protein serine/threonine kinase activity (GO:0004674);; Molecular Function: ATP binding (GO:0005524);;	K00924|9.0e-109|csat:104712177|K00924 kinase [EC:2.7.1.-] | (RefSeq) probable receptor-like protein kinase At3g55450 isoform X1	--	[T]	Signal transduction mechanisms	Protein kinase domain	Probable serine/threonine-protein kinase PBL3 OS=Arabidopsis thaliana OX=3702 GN=PBL3 PE=1 SV=1	T	Signal transduction mechanisms	PREDICTED: protein kinase 2B, chloroplastic-like isoform X2 [Solanum tuberosum]
gene.Soltu.DM.06G021200.1	3532	4158	3515	763	705	832	1951	1839	1723	35.2071	36.8004	32.6238	6.76481	7.08208	7.54419	18.027	16.867	17.8347	0.000398319	-1.55225	down	[E]	Amino acid transport and metabolism	Molecular Function: aspartate kinase activity (GO:0004072);; Biological Process: cellular amino acid biosynthetic process (GO:0008652);; Molecular Function: oxidoreductase activity (GO:0016491);; Molecular Function: NADP binding (GO:0050661);;	K12524|0.0e+00|sot:102605445|K12524 bifunctional aspartokinase / homoserine dehydrogenase 1 [EC:2.7.2.4 1.1.1.3] | (RefSeq) bifunctional aspartokinase/homoserine dehydrogenase 1, chloroplastic-like	Glycine, serine and threonine metabolism (ko00260);; Monobactam biosynthesis (ko00261);; Cysteine and methionine metabolism (ko00270);; Lysine biosynthesis (ko00300);; Biosynthesis of amino acids (ko01230)	--	--	Homoserine dehydrogenase	Bifunctional aspartokinase/homoserine dehydrogenase 1, chloroplastic OS=Arabidopsis thaliana OX=3702 GN=AKHSDH1 PE=1 SV=1	E	Amino acid transport and metabolism	PREDICTED: bifunctional aspartokinase/homoserine dehydrogenase 1, chloroplastic-like [Solanum tuberosum]
gene.Soltu.DM.04G034860.1	6	20	8	24	33	26	239	227	197	0.118523	0.375602	0.143045	0.463584	0.715021	0.509915	4.82862	4.56105	4.46715	0.000858808	3.48031	up	[H]	Coenzyme transport and metabolism	Molecular Function: methyltransferase activity (GO:0008168);;	K20858|2.8e-120|sot:102596881|K20858 calcium uniporter protein, mitochondrial | (RefSeq) calcium uniporter protein 4, mitochondrial	--	[R]	General function prediction only	Methyltransferase domain	Calcium uniporter protein 4, mitochondrial OS=Arabidopsis thaliana OX=3702 GN=At5g42610 PE=2 SV=1	S	Function unknown	PREDICTED: putative methyltransferase DDB_G0268948, partial [Solanum tuberosum]
gene.Soltu.DM.10G019040.1	2	2	5	26	21	27	77	103	106	0.15014	0.091387	0.345844	1.76884	1.57381	1.83884	5.41514	7.23135	8.39441	5.78125e-06	4.29739	up	--	--	Molecular Function: peroxidase activity (GO:0004601);; Biological Process: response to oxidative stress (GO:0006979);; Molecular Function: heme binding (GO:0020037);; Biological Process: hydrogen peroxide catabolic process (GO:0042744);; Molecular Function: metal ion binding (GO:0046872);;	K00430|1.1e-69|sot:102592433|K00430 peroxidase [EC:1.11.1.7] | (RefSeq) cationic peroxidase 1-like	Phenylpropanoid biosynthesis (ko00940)	--	--	Peroxidase	Cationic peroxidase 1 OS=Arachis hypogaea OX=3818 GN=PNC1 PE=1 SV=2	S	Function unknown	PREDICTED: cationic peroxidase 1-like [Solanum tuberosum]
gene.Soltu.DM.04G030020.1	88	115	157	351	347	378	337	372	374	2.0887	2.42103	3.48077	7.4564	8.3545	8.20748	7.4419	8.15879	9.27025	1.2195e-14	1.52707	up	--	--	--	K00020|1.7e-22|mtr:MTR_8g088900|K00020 3-hydroxyisobutyrate dehydrogenase [EC:1.1.1.31] | (RefSeq) 6-phosphogluconate dehydrogenase-like protein	Valine, leucine and isoleucine degradation (ko00280)	--	--	Phosphate-induced protein 1 conserved region	Protein PHOSPHATE-INDUCED 1 OS=Nicotiana tabacum OX=4097 GN=PHI-1 PE=2 SV=1	S	Function unknown	PREDICTED: protein EXORDIUM-like [Solanum tuberosum]
gene.Soltu.DM.06G032600.1	130	122	149	540	472	497	955	1108	942	1.84509	1.54158	1.97718	6.84276	6.78992	6.45327	12.6183	14.5306	13.953	3.44417e-11	2.44501	up	--	--	Molecular Function: UDP-glycosyltransferase activity (GO:0008194);;	K00927|4.0e-60|ini:109182250|K00927 phosphoglycerate kinase [EC:2.7.2.3] | (RefSeq) uncharacterized LOC109182250	Glycolysis / Gluconeogenesis (ko00010);; Carbon fixation in photosynthetic organisms (ko00710);; Carbon metabolism (ko01200);; Biosynthesis of amino acids (ko01230)	[GC]	Carbohydrate transport and metabolism;; Energy production and conversion	UDP-glucoronosyl and UDP-glucosyl transferase	UDP-glycosyltransferase 87A2 OS=Arabidopsis thaliana OX=3702 GN=UGT87A2 PE=1 SV=1	S	Function unknown	PREDICTED: UDP-glycosyltransferase 87A1-like [Solanum tuberosum]
gene.Soltu.DM.10G014400.1	83	177	90	10	14	20	0	5	4	3.95524	7.54175	4.00159	0.425417	0.659798	0.856872	0	0.182347	0.181172	4.62388e-06	-3.78987	down	[S]	Function unknown	Cellular Component: extracellular space (GO:0005615);;	K13449|8.1e-88|sot:102595771|K13449 pathogenesis-related protein 1 | (RefSeq) pathogenesis-related protein 1C-like	MAPK signaling pathway - plant (ko04016);; Plant hormone signal transduction (ko04075);; Plant-pathogen interaction (ko04626)	[S]	Function unknown	Cysteine-rich secretory protein family	Pathogenesis-related protein 1C OS=Nicotiana tabacum OX=4097 PE=2 SV=3	S	Function unknown	PREDICTED: pathogenesis-related protein 1C-like, partial [Solanum tuberosum]
gene.Soltu.DM.10G002080.1	4	10	12	37	43	24	41	27	25	0.047525	0.10162	0.131077	0.392135	0.51762	0.259638	0.448608	0.287122	0.303278	0.000785076	1.86981	up	--		Molecular Function: protein serine/threonine kinase activity (GO:0004674);; Molecular Function: ATP binding (GO:0005524);; Cellular Component: integral component of membrane (GO:0016021);; Biological Process: recognition of pollen (GO:0048544);;	K24104|7.6e-74|thj:104799061|K24104 GPN-loop GTPase | (RefSeq) LOW QUALITY PROTEIN: uncharacterized protein LOC104799061	--	--	--	Protein tyrosine and serine/threonine kinase	G-type lectin S-receptor-like serine/threonine-protein kinase At4g27290 OS=Arabidopsis thaliana OX=3702 GN=At4g27290 PE=3 SV=4	T	Signal transduction mechanisms	PREDICTED: G-type lectin S-receptor-like serine/threonine-protein kinase At4g27290 isoform X1 [Solanum tuberosum]
gene.Soltu.DM.03G036750.1	77	84	57	143	128	170	172	247	163	2.05161	1.98642	1.39768	3.38912	3.43823	4.11668	4.23861	6.03835	4.50753	9.16989e-05	1.17165	up	--	--	Molecular Function: transcription factor activity, sequence-specific DNA binding (GO:0003700);;	K08064|3.4e-158|sot:102578385|K08064 nuclear transcription factor Y, alpha | (RefSeq) nuclear transcription factor Y subunit A-3-like	--	[K]	Transcription	CCAAT-binding transcription factor (CBF-B/NF-YA) subunit B	Nuclear transcription factor Y subunit A-3 OS=Arabidopsis thaliana OX=3702 GN=NFYA3 PE=2 SV=2	K	Transcription	PREDICTED: nuclear transcription factor Y subunit A-3-like [Solanum tuberosum]
gene.Soltu.DM.06G019000.1	25	25	18	62	30	64	58	100	104	1.39476	1.24311	0.906932	3.09483	1.66063	3.24882	2.9981	5.12501	6.06011	0.0052824	1.57254	up	[QV]	Secondary metabolites biosynthesis, transport and catabolism;; Defense mechanisms	Molecular Function: monooxygenase activity (GO:0004497);; Molecular Function: iron ion binding (GO:0005506);; Molecular Function: oxidoreductase activity, acting on paired donors, with incorporation or reduction of molecular oxygen (GO:0016705);; Molecular Function: heme binding (GO:0020037);;	K23810|1.7e-62|vvi:100232891|K23810 (E)-8-carboxylinalool synthase [EC:1.14.14.-] | (RefSeq) GFH2; ripening-related P-450 enzyme-like	Monoterpenoid biosynthesis (ko00902)	[Q]	Secondary metabolites biosynthesis, transport and catabolism	Cytochrome P450	Cytochrome P450 76C2 OS=Arabidopsis thaliana OX=3702 GN=CYP76C2 PE=2 SV=1	Q	Secondary metabolites biosynthesis, transport and catabolism	PREDICTED: geraniol 8-hydroxylase-like [Solanum tuberosum]
gene.Soltu.DM.09G022850.1	34	41	34	69	64	81	123	125	78	0.749468	0.793951	0.698016	1.34952	1.41675	1.62792	2.51806	2.53714	1.78943	0.0012814	1.25277	up	--	--	Molecular Function: protein binding (GO:0005515);; Cellular Component: integral component of membrane (GO:0016021);;	--	--	[R]	General function prediction only	Leucine rich repeat	Receptor-like protein 7 OS=Arabidopsis thaliana OX=3702 GN=RLP7 PE=3 SV=2	S	Function unknown	elicitin response receptor-like protein [Solanum microdontum]
Solanum_tuberosum_newGene_2670	6	12	12	258	197	211	96	126	112	0.038409	0.162999	0.075059	2.28107	1.96654	1.51559	0.799022	0.982242	1.28005	5.10853e-19	3.98268	up	--	--	--	K02112|4.29e-08|nau:109216898|K02112 F-type H+/Na+-transporting ATPase subunit beta [EC:7.1.2.2 7.2.2.1] | (RefSeq) uncharacterized protein LOC109216898	Oxidative phosphorylation (ko00190);; Photosynthesis (ko00195)	--	--	--	--	L	Replication, recombination and repair	PREDICTED: uncharacterized protein LOC109241949 [Nicotiana attenuata]
gene.Soltu.DM.01G028720.1	40	144	61	0	5	2	3	18	9	1.50352	4.80274	2.11674	0	0.153321	0.065517	0.101453	0.618001	0.344519	0.000556966	-3.71473	down	--	--	Biological Process: lipid transport (GO:0006869);; Molecular Function: lipid binding (GO:0008289);;	--	--	--	--	Protease inhibitor/seed storage/LTP family	Non-specific lipid-transfer protein 3 OS=Oryza sativa subsp. indica OX=39946 GN=LTP110-A PE=2 SV=1	U	Intracellular trafficking, secretion, and vesicular transport	PREDICTED: non-specific lipid-transfer protein 4.1-like [Solanum tuberosum]
gene.Soltu.DM.10G027420.2	56	385	227	83	79	58	62	89	72	1.51406	9.2218	5.7084	1.97711	2.12837	1.42213	1.54237	2.19994	2.01944	0.00462391	-1.60523	down	[S]	Function unknown	Cellular Component: integral component of membrane (GO:0016021);;	K13024|9.0e-13|nau:109206676|K13024 inositol-hexakisphosphate/diphosphoinositol-pentakisphosphate 1-kinase [EC:2.7.4.24] | (RefSeq) inositol hexakisphosphate and diphosphoinositol-pentakisphosphate kinase 2-like isoform X1	Phosphatidylinositol signaling system (ko04070)	[S]	Function unknown	Integral membrane protein DUF92	Protein PGR OS=Arabidopsis thaliana OX=3702 GN=PGR PE=2 SV=1	S	Function unknown	PREDICTED: transmembrane protein 19 [Solanum tuberosum]
Solanum_tuberosum_newGene_5484	9	36	12	297	315	335	33	42	15	0.07891	0.301479	0.096038	3.2878	4.10557	3.84932	0.369288	0.430522	0.17088	0.00520139	3.11632	up	--	--	--	--	--	--	--	--	--	--	--	PREDICTED: F-box protein PP2-B10-like isoform X2 [Solanum tuberosum]
gene.Soltu.DM.02G019400.2	158	155	114	238	258	277	455	366	357	2.98191	2.60107	2.00136	4.01328	4.92378	4.77577	8.00546	6.38075	7.02357	0.00049635	1.14299	up	--	--	Molecular Function: magnesium ion binding (GO:0000287);; Molecular Function: terpene synthase activity (GO:0010333);;	K18108|2.1e-180|vvi:100232956|K18108 (-)-alpha-terpineol synthase [EC:4.2.3.111] | (RefSeq) (-)-a-terpineol synthase	Monoterpenoid biosynthesis (ko00902)	--	--	Terpene synthase family, metal binding domain	(-)-alpha-terpineol synthase OS=Vitis vinifera OX=29760 PE=1 SV=1	O	Posttranslational modification, protein turnover, chaperones	PREDICTED: (-)-alpha-terpineol synthase-like isoform X1 [Solanum tuberosum]
gene.Soltu.DM.01G005320.1	30	42	31	55	61	76	82	85	89	0.860635	1.07125	0.827563	1.40294	1.76047	1.98398	2.19001	2.25572	2.64446	0.00301538	1.07703	up	[QV]	Secondary metabolites biosynthesis, transport and catabolism;; Defense mechanisms	Molecular Function: monooxygenase activity (GO:0004497);; Molecular Function: iron ion binding (GO:0005506);; Cellular Component: integral component of membrane (GO:0016021);; Molecular Function: oxidoreductase activity, acting on paired donors, with incorporation or reduction of molecular oxygen (GO:0016705);; Molecular Function: heme binding (GO:0020037);;	K15472|8.4e-162|nau:109237629|K15472 premnaspirodiene oxygenase [EC:1.14.14.151] | (RefSeq) premnaspirodiene oxygenase	Sesquiterpenoid and triterpenoid biosynthesis (ko00909)	[Q]	Secondary metabolites biosynthesis, transport and catabolism	Cytochrome P450	Premnaspirodiene oxygenase OS=Hyoscyamus muticus OX=35626 GN=CYP71D55 PE=1 SV=1	Q	Secondary metabolites biosynthesis, transport and catabolism	premnaspirodiene oxygenase-like [Solanum lycopersicum]
gene.Soltu.DM.10G018870.1	2482	1464	1614	3887	4449	3469	6775	7010	6542	255.897	133.989	154.875	356.594	462.764	325.539	647.495	665.097	700.738	3.09672e-05	1.47027	up	--	--	Biological Process: lipid transport (GO:0006869);; Molecular Function: lipid binding (GO:0008289);;	--	--	--	--	Protease inhibitor/seed storage/LTP family	Non-specific lipid-transfer protein 2 OS=Solanum lycopersicum OX=4081 GN=LE16 PE=2 SV=1	--	--	PREDICTED: non-specific lipid-transfer protein 2-like [Solanum tuberosum]
gene.Soltu.DM.11G023590.3	66	124	56	23	38	5	29	18	16	0.84846	1.42865	0.675183	0.258498	0.500178	0.050604	0.349808	0.214578	0.216628	0.00399332	-1.95687	down	--	--	Molecular Function: ADP binding (GO:0043531);;	K15078|6.6e-24|tcc:18614561|K15078 structure-specific endonuclease subunit SLX1 [EC:3.6.1.-] | (RefSeq) putative disease resistance protein RGA3	--	[T]	Signal transduction mechanisms	Leucine Rich repeats (2 copies)	Putative disease resistance RPP13-like protein 1 OS=Arabidopsis thaliana OX=3702 GN=RPPL1 PE=3 SV=1	S	Function unknown	PREDICTED: putative disease resistance RPP13-like protein 1 [Solanum tuberosum]
gene.Soltu.DM.07G025030.1	11	24	9	53	34	54	66	103	110	0.128718	0.261607	0.094415	0.581919	0.424507	0.606317	0.747629	1.16737	1.4158	0.0002762	2.24106	up	[T]	Signal transduction mechanisms	Molecular Function: protein serine/threonine kinase activity (GO:0004674);; Molecular Function: ATP binding (GO:0005524);; Cellular Component: integral component of membrane (GO:0016021);; Biological Process: recognition of pollen (GO:0048544);;	K24104|4.2e-73|thj:104799061|K24104 GPN-loop GTPase | (RefSeq) LOW QUALITY PROTEIN: uncharacterized protein LOC104799061	--	--	--	Protein kinase domain	G-type lectin S-receptor-like serine/threonine-protein kinase At4g27290 OS=Arabidopsis thaliana OX=3702 GN=At4g27290 PE=3 SV=4	T	Signal transduction mechanisms	PREDICTED: G-type lectin S-receptor-like serine/threonine-protein kinase At4g27290 isoform X1 [Solanum tuberosum]
gene.Soltu.DM.07G016130.1	48	31	53	124	101	110	95	109	99	1.07895	0.622223	1.12694	2.5208	2.33252	2.28929	1.99971	2.28458	2.34561	3.82043e-06	1.1967	up	--	--	Cellular Component: integral component of membrane (GO:0016021);; Molecular Function: metal ion binding (GO:0046872);; Biological Process: oxidation-reduction process (GO:0055114);;	--	--	[T]	Signal transduction mechanisms	Protein of unknown function (DUF568)	Cytochrome b561 and DOMON domain-containing protein At4g17280 OS=Arabidopsis thaliana OX=3702 GN=At4g17280 PE=2 SV=1	S	Function unknown	PREDICTED: cytochrome b561 and DOMON domain-containing protein At5g47530-like [Solanum tuberosum]
gene.Soltu.DM.10G009280.1	8	17	8	30	18	25	51	63	46	0.410077	0.741265	0.357117	1.34292	0.930681	1.14048	2.43052	2.96158	2.43985	0.00994287	1.79126	up	--	--	Molecular Function: DNA binding (GO:0003677);; Molecular Function: transcription factor activity, sequence-specific DNA binding (GO:0003700);; Cellular Component: nucleus (GO:0005634);;	K09286|1.0e-15|gab:108484083|K09286 EREBP-like factor | (RefSeq) dehydration-responsive element-binding protein 3-like	--	--	--	--	Ethylene-responsive transcription factor ERF035 OS=Arabidopsis thaliana OX=3702 GN=ERF035 PE=2 SV=1	K	Transcription	PREDICTED: ethylene-responsive transcription factor ERF038-like [Solanum tuberosum]
gene.Soltu.DM.08G000110.1	478	505	457	1135	1016	1077	1412	1616	1455	7.51357	7.04338	6.6818	15.8773	16.121	15.4169	20.5725	23.3773	23.7744	1.63134e-10	1.36914	up	[I]	Lipid transport and metabolism	Molecular Function: hydroxymethylglutaryl-CoA synthase activity (GO:0004421);; Biological Process: isoprenoid biosynthetic process (GO:0008299);; Biological Process: sterol biosynthetic process (GO:0016126);;	K01641|1.4e-270|sot:102584775|K01641 hydroxymethylglutaryl-CoA synthase [EC:2.3.3.10] | (RefSeq) hydroxymethylglutaryl-CoA synthase-like	Synthesis and degradation of ketone bodies (ko00072);; Valine, leucine and isoleucine degradation (ko00280);; Butanoate metabolism (ko00650);; Terpenoid backbone biosynthesis (ko00900)	[I]	Lipid transport and metabolism	Hydroxymethylglutaryl-coenzyme A synthase C terminal	Hydroxymethylglutaryl-CoA synthase OS=Arabidopsis thaliana OX=3702 GN=HMGS PE=1 SV=2	I	Lipid transport and metabolism	PREDICTED: hydroxymethylglutaryl-CoA synthase-like [Solanum tuberosum]
gene.Soltu.DM.02G013410.4	0	2	15	487	0	1117	1041	1146	845	0	0.040964	0.378472	12.0691	0	28.3478	26.9036	29.395	24.4709	0.000645478	7.02059	up	[J]	Translation, ribosomal structure and biogenesis	Molecular Function: structural constituent of ribosome (GO:0003735);; Cellular Component: ribosome (GO:0005840);; Biological Process: translation (GO:0006412);; Molecular Function: rRNA binding (GO:0019843);;	K02987|1.3e-148|sot:102587726|K02987 small subunit ribosomal protein S4e | (RefSeq) 40S ribosomal protein S4-like	Ribosome (ko03010)	[J]	Translation, ribosomal structure and biogenesis	Ribosomal family S4e	40S ribosomal protein S4 OS=Solanum tuberosum OX=4113 GN=RPS4 PE=2 SV=1	J	Translation, ribosomal structure and biogenesis	PREDICTED: 40S ribosomal protein S4-like [Solanum tuberosum]
gene.Soltu.DM.02G033940.1	312	313	270	708	705	804	551	553	523	3.72579	3.31575	3.00494	7.5336	8.50373	8.75484	6.10178	6.07988	6.49298	3.56458e-11	1.03116	up	--	--	Cellular Component: integral component of membrane (GO:0016021);;	K15015|1.6e-17|lang:109332400|K15015 solute carrier family 32 (vesicular inhibitory amino acid transporter) | (RefSeq) vacuolar amino acid transporter 1-like	--	[E]	Amino acid transport and metabolism	Transmembrane amino acid transporter protein	Lysine histidine transporter 1 OS=Arabidopsis thaliana OX=3702 GN=LHT1 PE=1 SV=1	E	Amino acid transport and metabolism	Lysine histidine transporter 1, partial [Cajanus cajan]
gene.Soltu.DM.02G019240.1	81	82	92	200	143	177	350	345	351	0.959054	0.859249	1.01164	2.11104	1.71043	1.90806	3.85292	3.77178	4.32707	0.000313799	1.57531	up	[T]	Signal transduction mechanisms	Molecular Function: protein serine/threonine kinase activity (GO:0004674);; Molecular Function: ATP binding (GO:0005524);; Cellular Component: integral component of membrane (GO:0016021);; Biological Process: recognition of pollen (GO:0048544);;	K24104|3.9e-74|thj:104799061|K24104 GPN-loop GTPase | (RefSeq) LOW QUALITY PROTEIN: uncharacterized protein LOC104799061	--	--	--	Protein kinase domain	Putative G-type lectin S-receptor-like serine/threonine-protein kinase At1g61610 OS=Arabidopsis thaliana OX=3702 GN=At1g61610 PE=3 SV=1	T	Signal transduction mechanisms	hypothetical protein T459_05745 [Capsicum annuum]
gene.Soltu.DM.12G026110.2	0	0	0	0	56	100	11	59	0	0	0	0	0	4.67369	7.64415	0.847199	4.54844	0	0.00447046	7.57575	up	--	--	Cellular Component: integral component of membrane (GO:0016021);;	--	--	--	--	--	Protein FIP1 OS=Arabidopsis thaliana OX=3702 GN=FIP1 PE=1 SV=1	S	Function unknown	PREDICTED: uncharacterized protein LOC102597756 [Solanum tuberosum]
gene.Soltu.DM.08G027290.1	108	278	63	384	389	288	559	494	382	3.15854	7.26816	1.71371	10.0643	11.551	7.7198	15.2628	13.3971	11.6869	0.00211785	1.46135	up	--	--	Biological Process: immune system process (GO:0002376);; Biological Process: response to stress (GO:0006950);; Biological Process: defense response (GO:0006952);; Biological Process: immune response (GO:0006955);; Biological Process: response to osmotic stress (GO:0006970);; Biological Process: biological_process (GO:0008150);; Biological Process: response to external stimulus (GO:0009605);; Biol…	--	--	--	--	Thaumatin family	Osmotin-like protein OSML15 OS=Solanum commersonii OX=4109 PE=2 SV=1	--	--	PREDICTED: osmotin-like protein OSML15 [Solanum tuberosum]
gene.Soltu.DM.03G005520.1	167	264	157	720	463	636	1107	1030	947	3.62636	5.0756	3.15729	13.9203	10.1325	12.5722	22.2798	20.5835	21.3629	8.98966e-10	2.02529	up	--	--	Molecular Function: peroxidase activity (GO:0004601);; Cellular Component: extracellular region (GO:0005576);; Biological Process: response to oxidative stress (GO:0006979);; Molecular Function: heme binding (GO:0020037);; Biological Process: hydrogen peroxide catabolic process (GO:0042744);; Molecular Function: metal ion binding (GO:0046872);;	K00430|1.5e-186|sot:102587234|K00430 peroxidase [EC:1.11.1.7] | (RefSeq) prx2; peroxidase 51-like	Phenylpropanoid biosynthesis (ko00940)	--	--	Peroxidase	Peroxidase 51 OS=Arabidopsis thaliana OX=3702 GN=PER51 PE=2 SV=1	G	Carbohydrate transport and metabolism	peroxidase 51-like precursor [Solanum tuberosum]
gene.Soltu.DM.03G013460.1	14	14	16	90	62	73	61	49	102	0.227632	0.203387	0.236148	1.33179	1.03286	1.10017	0.9369	0.755824	1.76233	1.02868e-07	2.25823	up	--	--	Molecular Function: calmodulin binding (GO:0005516);; Biological Process: defense response (GO:0006952);; Biological Process: response to biotic stimulus (GO:0009607);; Cellular Component: integral component of membrane (GO:0016021);;	K08472|9.7e-305|sot:102587411|K08472 mlo protein | (RefSeq) MLO-like protein 6	--	--	--	Mlo family	MLO-like protein 6 OS=Arabidopsis thaliana OX=3702 GN=MLO6 PE=2 SV=2	--	--	PREDICTED: MLO-like protein 6 [Solanum tuberosum]
gene.Soltu.DM.12G024050.1	12951	13694	12777	5300	5141	6081	6154	6357	5442	223.79	210.09	205.545	81.4878	89.6082	95.6459	98.5533	101.073	97.6733	5.21648e-36	-1.25479	down	[H]	Coenzyme transport and metabolism	Molecular Function: transaminase activity (GO:0008483);;	K16871|3.3e-272|sot:102595558|K16871 4-aminobutyrate---pyruvate transaminase [EC:2.6.1.96] | (RefSeq) gamma aminobutyrate transaminase 2	Alanine, aspartate and glutamate metabolism (ko00250);; Butanoate metabolism (ko00650)	[E]	Amino acid transport and metabolism	Aminotransferase class-III	Gamma aminobutyrate transaminase 2 OS=Solanum lycopersicum OX=4081 GN=GABA-TP2 PE=1 SV=1	E	Amino acid transport and metabolism	PREDICTED: gamma aminobutyrate transaminase 2 [Solanum tuberosum]
gene.Soltu.DM.08G016980.1	683	630	800	1607	1661	2248	1613	1978	1372	3.5383	2.89766	3.85773	7.40731	8.68	10.5988	7.74461	9.42656	7.38131	3.5663e-15	1.23347	up	--	--	--	K08737|1.2e-08|cqi:110733055|K08737 DNA mismatch repair protein MSH6 | (RefSeq) DNA mismatch repair protein MSH6-like	Mismatch repair (ko03430)	--	--	Enhancer of polycomb-like	--	S	Function unknown	PREDICTED: LOW QUALITY PROTEIN: uncharacterized protein LOC102595136 [Solanum tuberosum]
gene.Soltu.DM.09G026280.1	59	80	65	123	181	157	272	276	174	1.202	1.44363	1.23453	2.23522	3.74802	2.932	5.16734	5.20847	3.70514	4.88083e-05	1.49087	up	[Q]	Secondary metabolites biosynthesis, transport and catabolism	Molecular Function: oxidoreductase activity (GO:0016491);; Molecular Function: metal ion binding (GO:0046872);;	K13229|4.9e-74|ats:109766943|K13229 2,4-dihydroxy-1,4-benzoxazin-3-one-glucoside dioxygenase [EC:1.14.11.59] | (RefSeq) LOC109766943; DIBOA-glucoside dioxygenase BX6-like	Benzoxazinoid biosynthesis (ko00402)	[QR]	Secondary metabolites biosynthesis, transport and catabolism;; General function prediction only	2OG-Fe(II) oxygenase superfamily	Deacetoxyvindoline 4-hydroxylase OS=Catharanthus roseus OX=4058 GN=D4H PE=1 SV=2	S	Function unknown	PREDICTED: deacetoxyvindoline 4-hydroxylase-like [Solanum tuberosum]
gene.Soltu.DM.03G034850.1	123	98	115	244	232	236	369	499	438	3.1938	2.25024	2.77433	5.63782	6.05761	5.56618	8.87748	11.9324	11.811	9.71064e-05	1.53452	up	--	--	Molecular Function: protein binding (GO:0005515);; Cellular Component: cellular_component (GO:0005575);; Cellular Component: intracellular (GO:0005622);; Cellular Component: cell (GO:0005623);; Cellular Component: cytoplasm (GO:0005737);; Cellular Component: Golgi apparatus (GO:0005794);; Cellular Component: Golgi-associated vesicle (GO:0005798);; Biological Process: transport (GO:0006810);; Biol…	K17302|3.3e-66|oeu:111367292|K17302 coatomer subunit beta' | (RefSeq) coatomer subunit beta'-2-like isoform X1	--	[U]	Intracellular trafficking, secretion, and vesicular transport	WD domain, G-beta repeat	Coatomer subunit beta'-1 OS=Arabidopsis thaliana OX=3702 GN=At1g79990 PE=2 SV=2	S	Function unknown	PREDICTED: coatomer subunit beta'-1-like [Solanum tuberosum]
gene.Soltu.DM.05G004740.1	42	46	50	130	92	88	192	205	193	1.21659	1.18108	1.35092	3.39812	2.72564	2.34618	5.22976	5.53833	5.90675	0.000190548	1.66137	up	--	--	--	--	--	--	--	Domain of unknown function (DUF4228)	Uncharacterized protein At1g66480 OS=Arabidopsis thaliana OX=3702 GN=At1g66480 PE=2 SV=1	S	Function unknown	PREDICTED: uncharacterized protein At1g66480-like [Solanum tuberosum]
Solanum_tuberosum_newGene_2791	0	8	6	40	75	68	56	67	75	0	0.11422	0.09068	0.599911	1.29085	1.04903	0.875795	1.04849	1.32594	7.08948e-10	3.74252	up	--	--	Molecular Function: zinc ion binding (GO:0008270);;	K17086|1.21e-53|fve:101300290|K17086 transmembrane 9 superfamily member 2/4 | (RefSeq) uncharacterized LOC101300290	--	--	--	MuDR family transposase	--	--	--	PREDICTED: uncharacterized protein LOC107060571 [Solanum tuberosum]
gene.Soltu.DM.03G015520.1	248	291	306	1349	1297	1256	801	983	755	8.49348	8.843	9.76472	41.1383	44.8608	39.207	25.4616	30.9997	26.8836	3.04256e-22	1.85552	up	--	--	Molecular Function: enzyme inhibitor activity (GO:0004857);;	K01051|4.2e-14|han:110880309|K01051 pectinesterase [EC:3.1.1.11] | (RefSeq) pectinesterase-like	Pentose and glucuronate interconversions (ko00040)	--	--	Plant invertase/pectin methylesterase inhibitor	21 kDa protein OS=Daucus carota OX=4039 PE=2 SV=1	S	Function unknown	PREDICTED: 21 kDa protein-like isoform X2 [Solanum tuberosum]
gene.Soltu.DM.03G011980.1	25	25	3	56	53	36	381	407	411	0.530778	0.471014	0.059406	1.08714	1.17408	0.71978	7.79424	8.25548	9.41561	0.000644754	3.66315	up	--	--	Molecular Function: UDP-glycosyltransferase activity (GO:0008194);;	K16266|1.1e-185|mesc:110628474|K16266 cyanohydrin UDP-glucosyltransferase [EC:2.4.1.-] | (RefSeq) linamarin synthase 1	Cyanoamino acid metabolism (ko00460)	[GC]	Carbohydrate transport and metabolism;; Energy production and conversion	UDP-glucoronosyl and UDP-glucosyl transferase	Linamarin synthase 1 OS=Manihot esculenta OX=3983 GN=UGT85K4 PE=1 SV=1	S	Function unknown	PREDICTED: 7-deoxyloganetin glucosyltransferase-like [Solanum tuberosum]
gene.Soltu.DM.06G001460.1	19	14	26	79	59	69	98	87	85	0.203614	0.127139	0.263441	0.771021	0.644855	0.687247	0.994126	0.874807	0.972084	9.92501e-08	1.95053	up	--	--	Cellular Component: integral component of membrane (GO:0016021);;	K03131|3.9e-09|ghi:107956070|K03131 transcription initiation factor TFIID subunit 6 | (RefSeq) transcription initiation factor TFIID subunit 6b-like	Basal transcription factors (ko03022)	[R]	General function prediction only	Leucine rich repeat	Receptor-like protein Cf-9 homolog OS=Solanum lycopersicum OX=4081 GN=HCR9-0 PE=2 SV=2	S	Function unknown	PREDICTED: probable LRR receptor-like serine/threonine-protein kinase At4g08850 [Solanum tuberosum]
gene.Soltu.DM.01G005040.1	709	797	712	1420	1315	1326	2100	2085	1953	12.2179	12.2005	11.419	21.7777	22.8644	20.8064	33.5597	33.0768	34.9724	3.92932e-06	1.15476	up	[M]	Cell wall/membrane/envelope biogenesis	Molecular Function: catalytic activity (GO:0003824);;	K08695|7.9e-88|sbi:8066842|K08695 anthocyanidin reductase [EC:1.3.1.77] | (RefSeq) uncharacterized protein LOC8066842	Flavonoid biosynthesis (ko00941)	[V]	Defense mechanisms	NAD dependent epimerase/dehydratase family	Phenylacetaldehyde reductase OS=Rosa hybrid cultivar OX=128735 GN=PAR PE=1 SV=1	M	Cell wall/membrane/envelope biogenesis	uncharacterized protein LOC114717775 isoform X2 [Prosopis alba]
gene.Soltu.DM.07G016780.1	444	517	415	5373	4521	4893	8386	9527	8696	10.7562	11.1326	9.36814	116.03	110.696	108.099	188.66	212.773	219.255	7.27993e-42	3.87113	up	[Q]	Secondary metabolites biosynthesis, transport and catabolism	Molecular Function: oxidoreductase activity (GO:0016491);; Molecular Function: metal ion binding (GO:0046872);;	K05933|1.8e-184|sot:102584001|K05933 aminocyclopropanecarboxylate oxidase [EC:1.14.17.4] | (RefSeq) 1-aminocyclopropane-1-carboxylate oxidase 4	Cysteine and methionine metabolism (ko00270)	[QR]	Secondary metabolites biosynthesis, transport and catabolism;; General function prediction only	2OG-Fe(II) oxygenase superfamily	1-aminocyclopropane-1-carboxylate oxidase 4 OS=Solanum lycopersicum OX=4081 GN=ACO4 PE=2 SV=1	S	Function unknown	PREDICTED: 1-aminocyclopropane-1-carboxylate oxidase 4 [Solanum tuberosum]
gene.Soltu.DM.03G019620.1	197	182	205	282	279	315	566	606	566	4.10898	3.37319	3.9821	5.23698	5.87503	5.98407	10.9537	11.6423	12.2862	0.00998861	1.11694	up	--	--	Cellular Component: integral component of membrane (GO:0016021);;	K15102|1.5e-203|sot:102597288|K15102 solute carrier family 25 (mitochondrial phosphate transporter), member 3 | (RefSeq) mitochondrial phosphate carrier protein 3, mitochondrial-like	--	[C]	Energy production and conversion	Mitochondrial carrier protein	Mitochondrial phosphate carrier protein 3, mitochondrial OS=Arabidopsis thaliana OX=3702 GN=MPT3 PE=1 SV=1	S	Function unknown	PREDICTED: mitochondrial phosphate carrier protein 3, mitochondrial-like [Solanum tuberosum]
Solanum_tuberosum_newGene_3413	43	85	56	0	5	6	0	2	0	1.2348	2.16708	1.48918	0	0.144655	0.144231	0	0.052208	0	5.63524e-06	-4.88429	down	--	--	Molecular Function: DNA binding (GO:0003677);; Molecular Function: zinc ion binding (GO:0008270);;	K17604|7.15e-32|pxb:103928252|K17604 zinc finger SWIM domain-containing protein 3 | (RefSeq) uncharacterized protein LOC103928252	--	--	--	MULE transposase domain	--	--	--	transposase [Solanum demissum]
gene.Soltu.DM.02G029720.1	64	186	187	616	414	504	428	420	278	0.77085	2.0032	2.10625	6.65966	5.06716	5.57339	4.8235	4.69757	3.50719	5.6279e-06	1.54452	up	[T]	Signal transduction mechanisms	Molecular Function: protein serine/threonine kinase activity (GO:0004674);; Molecular Function: ATP binding (GO:0005524);; Cellular Component: integral component of membrane (GO:0016021);;	K23544|1.2e-63|brp:103842861|K23544 serine incorporator 1/3 | (RefSeq) serine incorporator 3	--	[T]	Signal transduction mechanisms	Protein kinase domain	Wall-associated receptor kinase-like 14 OS=Arabidopsis thaliana OX=3702 GN=WAKL14 PE=2 SV=2	T	Signal transduction mechanisms	PREDICTED: wall-associated receptor kinase-like 14 [Solanum tuberosum]
gene.Soltu.DM.03G032230.1	11	23	24	46	56	31	87	60	62	0.24688	0.452898	0.500695	0.914787	1.25796	0.621654	1.80326	1.22703	1.42852	0.00526292	1.52848	up	--	--	Molecular Function: inositol-1,4,5-trisphosphate 6-kinase activity (GO:0000823);; Molecular Function: ATP binding (GO:0005524);; Biological Process: inositol phosphate biosynthetic process (GO:0032958);; Molecular Function: inositol tetrakisphosphate 5-kinase activity (GO:0047326);; Molecular Function: myo-inositol-1,2,3,4,6-heptakisphosphate 5-kinase activity (GO:0102732);;	K00915|1.4e-170|sot:102599548|K00915 inositol-polyphosphate multikinase [EC:2.7.1.140 2.7.1.151] | (RefSeq) inositol polyphosphate multikinase beta	Inositol phosphate metabolism (ko00562);; Phosphatidylinositol signaling system (ko04070)	[KIT]	Transcription;; Lipid transport and metabolism;; Signal transduction mechanisms	Inositol polyphosphate kinase	Inositol polyphosphate multikinase beta OS=Arabidopsis thaliana OX=3702 GN=IPK2b PE=1 SV=1	S	Function unknown	PREDICTED: inositol polyphosphate multikinase beta [Solanum tuberosum]
gene.Soltu.DM.07G014050.1	192	239	208	565	477	492	341	444	372	11.265	12.4337	11.3765	29.5201	28.2503	26.2749	18.5472	23.9642	22.6649	1.09585e-10	1.00672	up	--	--	--	--	--	--	--	VQ motif	VQ motif-containing protein 22 OS=Arabidopsis thaliana OX=3702 GN=VQ22 PE=2 SV=1	S	Function unknown	PREDICTED: VQ motif-containing protein 22-like [Solanum tuberosum]
gene.Soltu.DM.03G013870.1	0	4	2	10	2	4	65	58	110	0	0.052967	0.024002	0.151677	0.034347	0.049227	1.07717	0.956013	2.04414	0.00736818	4.44481	up	--	--	Cellular Component: integral component of membrane (GO:0016021);;	K20784|2.5e-06|vcn:VOLCADRAFT_77645|K20784 arabinosyltransferase [EC:2.4.2.-] | (RefSeq) hypothetical protein	Other types of O-glycan biosynthesis (ko00514)	--	--	Nucleotide-diphospho-sugar transferase	Uncharacterized protein At1g28695 OS=Arabidopsis thaliana OX=3702 GN=At1g28695 PE=2 SV=1	S	Function unknown	PREDICTED: uncharacterized protein At1g28695-like [Solanum tuberosum]
gene.Soltu.DM.07G000140.1	82	47	50	110	87	156	410	229	170	4.85071	2.42725	2.71353	5.79897	5.1926	8.38673	22.5405	12.5143	10.4337	0.00979831	1.62886	up	[G]	Carbohydrate transport and metabolism	Biological Process: carbohydrate metabolic process (GO:0005975);; Molecular Function: chitin binding (GO:0008061);;	K01183|1.2e-94|sot:102599450|K01183 chitinase [EC:3.2.1.14] | (RefSeq) chitotriosidase-1-like	Amino sugar and nucleotide sugar metabolism (ko00520)	[G]	Carbohydrate transport and metabolism	Glycosyl hydrolases family 18	Class V chitinase OS=Arabidopsis thaliana OX=3702 GN=ChiC PE=1 SV=1	G	Carbohydrate transport and metabolism	PREDICTED: chitotriosidase-1-like [Solanum tuberosum]
gene.Soltu.DM.10G027790.1	1684	1890	1637	906	871	985	687	729	764	40.9279	40.784	37.0461	19.5909	21.3487	21.7817	15.4686	16.2924	19.2704	9.86796e-24	-1.14103	down	[C]	Energy production and conversion	Molecular Function: hydrolase activity (GO:0016787);;	K01097|3.4e-12|atr:18432282|K01097 N-acylneuraminate-9-phosphatase [EC:3.1.3.29] | (RefSeq) N-acylneuraminate-9-phosphatase isoform X1	Amino sugar and nucleotide sugar metabolism (ko00520)	[R]	General function prediction only	Haloacid dehalogenase-like hydrolase	--	S	Function unknown	PREDICTED: haloacid dehalogenase-like hydrolase domain-containing protein 3 [Solanum tuberosum]
gene.Soltu.DM.09G026810.1	17	14	11	203	216	246	230	116	160	0.347535	0.254303	0.194438	3.72881	4.50454	4.62869	4.4017	2.20784	3.42967	2.50685e-25	3.73258	up	[T]	Signal transduction mechanisms	Molecular Function: protein tyrosine kinase activity (GO:0004713);; Molecular Function: ATP binding (GO:0005524);; Cellular Component: integral component of membrane (GO:0016021);;	K13436|1.7e-106|mesc:110613894|K13436 pto-interacting protein 1 [EC:2.7.11.1] | (RefSeq) PTI1-like tyrosine-protein kinase 1 isoform X1	Plant-pathogen interaction (ko04626)	[T]	Signal transduction mechanisms	Protein tyrosine and serine/threonine kinase	Probable protein kinase At2g41970 OS=Arabidopsis thaliana OX=3702 GN=At2g41970 PE=2 SV=1	T	Signal transduction mechanisms	PREDICTED: probable protein kinase At2g41970 [Solanum tuberosum]
Solanum_tuberosum_newGene_7123	0	4	0	48	46	35	140	150	100	0	0.091709	0	1.2986	1.43213	0.985818	4.00664	4.25273	3.21284	3.24653e-08	6.02192	up	--	--	--	--	--	--	--	--	--	L	Replication, recombination and repair	putative LRR receptor-like serine/threonine-protein kinase-like [Capsicum annuum]
gene.Soltu.DM.08G001570.1	21	45	38	103	109	65	162	328	317	0.50353	0.978793	0.867085	2.25987	2.71275	1.45053	3.69214	7.43191	8.12804	0.000471411	2.3792	up	[R]	General function prediction only	Biological Process: lipid catabolic process (GO:0016042);; Molecular Function: hydrolase activity (GO:0016787);;	K16815|4.3e-07|gsl:Gasu_03780|K16815 calcium-independent phospholipase A2-gamma | (RefSeq) hypothetical protein	--	[I]	Lipid transport and metabolism	Patatin-like phospholipase	Probable inactive patatin-3-Kuras 1 OS=Solanum tuberosum OX=4113 GN=pat3-k1 PE=1 SV=1	S	Function unknown	RecName: Full=Probable inactive patatin-3-Kuras 1; Flags: Precursor [Solanum tuberosum]
gene.Soltu.DM.11G007200.1	216	288	241	631	556	576	450	505	403	2.23997	2.64935	2.32367	5.82195	5.81504	5.43912	4.32962	4.8209	4.3384	1.66106e-14	1.00073	up	[R]	General function prediction only	Biological Process: defense response (GO:0006952);; Molecular Function: ADP binding (GO:0043531);;	K13453|1.3e-107|nau:109235474|K13453 disease resistance protein | (RefSeq) putative late blight resistance protein homolog R1A-4	Plant-pathogen interaction (ko04626)	[T]	Signal transduction mechanisms	NB-ARC domain	Putative late blight resistance protein homolog R1A-10 OS=Solanum demissum OX=50514 GN=R1A-10 PE=3 SV=1	S	Function unknown	putative late blight resistance protein homolog R1B-12 [Solanum pennellii]
gene.Soltu.DM.10G027550.1	1102	484	537	2201	2320	2022	5813	4971	4603	26.8319	10.4537	12.1595	47.7075	57.0228	44.836	131.269	111.431	116.496	0.000159189	2.30368	up	--	--	Molecular Function: hydrolase activity, hydrolyzing O-glycosyl compounds (GO:0004553);; Biological Process: carbohydrate metabolic process (GO:0005975);;	K19893|3.2e-54|ath:AT5G58090|K19893 glucan endo-1,3-beta-glucosidase 5/6 [EC:3.2.1.39] | (RefSeq) O-Glycosyl hydrolases family 17 protein	Starch and sucrose metabolism (ko00500)	--	--	Glycosyl hydrolases family 17	Glucan endo-1,3-beta-glucosidase, acidic isoform PR-Q' OS=Nicotiana tabacum OX=4097 PE=1 SV=1	G	Carbohydrate transport and metabolism	glucan endo-1,3-beta-glucosidase, acidic isoform PR-Q'-like precursor [Solanum tuberosum]
gene.Soltu.DM.02G028500.1	126	161	156	327	343	400	292	363	322	3.36296	3.81148	3.87588	7.78652	9.25554	9.73557	7.23101	8.93695	8.93732	5.44009e-15	1.14788	up	--	--	Molecular Function: protein binding (GO:0005515);;	K10268|1.4e-08|fve:101300982|K10268 F-box and leucine-rich repeat protein 2/20 | (RefSeq) F-box protein SKP2B-like	--	[R]	General function prediction only	F-box-like	F-box protein At5g67140 OS=Arabidopsis thaliana OX=3702 GN=At5g67140 PE=2 SV=1	S	Function unknown	PREDICTED: F-box protein At5g67140 [Solanum tuberosum]
gene.Soltu.DM.02G014000.2	3429	3163	3646	1238	670	1371	2124	1661	1681	107.024	87.6246	105.929	34.3616	21.0898	38.942	61.4238	47.7003	54.4893	0.000257507	-1.28541	down	--	--	Cellular Component: photosystem I (GO:0009522);; Cellular Component: photosystem II (GO:0009523);; Cellular Component: chloroplast thylakoid membrane (GO:0009535);; Biological Process: photosynthesis, light harvesting (GO:0009765);; Cellular Component: integral component of membrane (GO:0016021);; Molecular Function: chlorophyll binding (GO:0016168);; Biological Process: protein-chromophore linka…	K08912|2.0e-152|sot:102593779|K08912 light-harvesting complex II chlorophyll a/b binding protein 1 | (RefSeq) Lhcb1-2; chlorophyll a-b binding protein 1C, chloroplastic	Photosynthesis - antenna proteins (ko00196)	--	--	Chlorophyll A-B binding protein	Chlorophyll a-b binding protein 1B, chloroplastic OS=Solanum lycopersicum OX=4081 GN=CAB1B PE=3 SV=1	J	Translation, ribosomal structure and biogenesis	PREDICTED: chlorophyll a-b binding protein 1C, chloroplastic [Solanum tuberosum]
gene.Soltu.DM.03G028130.1	79	176	79	399	307	286	494	584	467	1.39252	2.76444	1.30419	6.3089	5.50377	4.61602	8.13898	9.54684	8.62392	1.50427e-07	1.90122	up	--	--	Molecular Function: UDP-glycosyltransferase activity (GO:0008194);;	K23260|6.4e-74|fve:101299316|K23260 scopoletin glucosyltransferase [EC:2.4.1.128] | (RefSeq) scopoletin glucosyltransferase-like	Phenylpropanoid biosynthesis (ko00940)	[GC]	Carbohydrate transport and metabolism;; Energy production and conversion	UDP-glucoronosyl and UDP-glucosyl transferase	UDP-glycosyltransferase 90A1 OS=Arabidopsis thaliana OX=3702 GN=UGT90A1 PE=2 SV=1	S	Function unknown	PREDICTED: UDP-glycosyltransferase 90A1-like [Solanum tuberosum]
gene.Soltu.DM.06G023140.1	13	6	12	93	117	74	80	75	99	0.51456	0.191087	0.448818	3.32722	4.78268	2.71013	2.98079	2.77501	4.16464	2.00522e-13	3.05421	up	--	--	Cellular Component: cellular_component (GO:0005575);; Cellular Component: cell (GO:0005623);; Cellular Component: plasma membrane (GO:0005886);; Biological Process: response to stress (GO:0006950);; Biological Process: response to oxidative stress (GO:0006979);; Biological Process: biological_process (GO:0008150);; Cellular Component: membrane (GO:0016020);; Cellular Component: cell part (GO:0044…	--	--	--	--	PLAC8 family	Protein PLANT CADMIUM RESISTANCE 8 OS=Arabidopsis thaliana OX=3702 GN=PCR8 PE=1 SV=2	U	Intracellular trafficking, secretion, and vesicular transport	PREDICTED: protein PLANT CADMIUM RESISTANCE 8 [Solanum tuberosum]
gene.Soltu.DM.08G026790.1	206	299	38	787	613	687	643	692	520	1.79484	2.31351	0.302019	6.10023	5.38869	5.44703	5.18871	5.54447	4.70521	0.00034349	1.81028	up	[I]	Lipid transport and metabolism	Molecular Function: phospholipase D activity (GO:0004630);; Molecular Function: calcium ion binding (GO:0005509);; Cellular Component: membrane (GO:0016020);; Biological Process: lipid catabolic process (GO:0016042);; Biological Process: phosphatidylcholine metabolic process (GO:0046470);; Molecular Function: N-acylphosphatidylethanolamine-specific phospholipase D activity (GO:0070290);;	K01115|0.0e+00|sot:102600860|K01115 phospholipase D1/2 [EC:3.1.4.4] | (RefSeq) phospholipase D beta 1-like	Glycerophospholipid metabolism (ko00564);; Ether lipid metabolism (ko00565);; Endocytosis (ko04144)	[I]	Lipid transport and metabolism	Phospholipase D C terminal	Phospholipase D beta 1 OS=Arabidopsis thaliana OX=3702 GN=PLDBETA1 PE=1 SV=4	I	Lipid transport and metabolism	PREDICTED: phospholipase D beta 1-like isoform X2 [Solanum tuberosum]
gene.Soltu.DM.04G033100.1	23	23	24	52	34	70	72	61	62	0.531796	0.476366	0.528794	1.08338	0.811182	1.51484	1.57425	1.32319	1.51189	0.00169319	1.26363	up	--	--	Molecular Function: iron ion binding (GO:0005506);; Cellular Component: integral component of membrane (GO:0016021);; Molecular Function: oxidoreductase activity, acting on paired donors, with incorporation or reduction of molecular oxygen (GO:0016705);; Molecular Function: heme binding (GO:0020037);;	K13260|1.8e-24|cit:102624248|K13260 isoflavone/4'-methoxyisoflavone 2'-hydroxylase [EC:1.14.14.90 1.14.14.89] | (RefSeq) cytochrome P450 81E8-like	Isoflavonoid biosynthesis (ko00943)	[Q]	Secondary metabolites biosynthesis, transport and catabolism	Cytochrome P450	Cytochrome P450 81C13 OS=Catharanthus roseus OX=4058 GN=CYP81C13 PE=2 SV=1	Q	Secondary metabolites biosynthesis, transport and catabolism	isoflavone 2'-hydroxylase-like [Nicotiana tabacum]
gene.Soltu.DM.03G020160.1	62	105	106	24	8	9	13	25	22	1.2452	1.87102	1.98364	0.426688	0.155999	0.148253	0.22987	0.450066	0.442488	5.71171e-07	-2.48394	down	--	--	Biological Process: suberin biosynthetic process (GO:0010345);; Molecular Function: hydroxycinnamoyltransferase activity (GO:0050734);; Biological Process: cell wall pectin biosynthetic process (GO:0052325);;	K15400|8.2e-249|sot:102577559|K15400 omega-hydroxypalmitate O-feruloyl transferase [EC:2.3.1.188] | (RefSeq) feruloyl transferase	Cutin, suberine and wax biosynthesis (ko00073)	--	--	Transferase family	Omega-hydroxypalmitate O-feruloyl transferase OS=Arabidopsis thaliana OX=3702 GN=HHT1 PE=1 SV=1	S	Function unknown	PREDICTED: feruloyl transferase isoform X1 [Solanum tuberosum]
gene.Soltu.DM.05G022890.1	123	163	111	294	259	227	569	546	503	1.85657	2.19378	1.55738	3.9673	3.96865	3.13263	8.01182	7.63066	7.93874	0.000311206	1.5639	up	--	--	Molecular Function: UDP-glycosyltransferase activity (GO:0008194);;	K22706|3.1e-88|pmum:103319663|K22706 (R)-mandelonitrile beta-glucosyltransferase [EC:2.4.1.354] | (RefSeq) 7-deoxyloganetin glucosyltransferase-like	Cyanoamino acid metabolism (ko00460)	[GC]	Carbohydrate transport and metabolism;; Energy production and conversion	Protein of unknown function (DUF620)	7-deoxyloganetic acid glucosyl transferase OS=Catharanthus roseus OX=4058 GN=7DLGT PE=1 SV=1	S	Function unknown	PREDICTED: 7-deoxyloganetic acid glucosyltransferase-like [Solanum tuberosum]
Solanum_tuberosum_newGene_3372	14	5	2	27	40	43	26	42	35	0.353103	0.104056	0.042728	0.609327	1.03486	1.00216	0.616023	0.990211	0.931322	0.000568512	2.26158	up	--	--	Molecular Function: zinc ion binding (GO:0008270);;	K17604|1.21e-17|sot:102579571|K17604 zinc finger SWIM domain-containing protein 3 | (RefSeq) uncharacterized LOC102579571	--	--	--	SWIM zinc finger	--	--	--	PREDICTED: uncharacterized protein LOC107062984 [Solanum tuberosum]
gene.Soltu.DM.01G044300.1	766	807	771	2277	1942	2410	2071	2320	2181	18.9248	17.7012	17.7252	50.0608	48.407	54.2043	47.4303	52.7347	55.97	3.94672e-59	1.43019	up	--	--	Molecular Function: peroxidase activity (GO:0004601);; Cellular Component: extracellular region (GO:0005576);; Biological Process: response to oxidative stress (GO:0006979);; Molecular Function: heme binding (GO:0020037);; Biological Process: hydrogen peroxide catabolic process (GO:0042744);; Molecular Function: metal ion binding (GO:0046872);;	K00430|8.6e-190|sot:102585502|K00430 peroxidase [EC:1.11.1.7] | (RefSeq) CEVI16; peroxidase N1	Phenylpropanoid biosynthesis (ko00940)	--	--	Peroxidase	Peroxidase N1 OS=Nicotiana tabacum OX=4097 GN=poxN1 PE=1 SV=1	I	Lipid transport and metabolism	PREDICTED: peroxidase N1 [Solanum tuberosum]
gene.Soltu.DM.04G005970.1	299	281	389	1001	865	977	1129	1294	1180	6.95379	5.79484	8.43558	20.7507	20.331	20.718	24.3723	27.7456	28.5588	3.76495e-16	1.67301	up	--	--	Molecular Function: DNA binding (GO:0003677);; Cellular Component: nucleus (GO:0005634);; Biological Process: regulation of transcription, DNA-templated (GO:0006355);;	K00521|3.2e-42|cmos:111447866|K00521 ferric-chelate reductase [EC:1.16.1.7] | (RefSeq) ferric reduction oxidase 7, chloroplastic-like	--	--	--	No apical meristem (NAM) protein	Protein ATAF2 OS=Arabidopsis thaliana OX=3702 GN=NAC081 PE=1 SV=1	S	Function unknown	NAC domain-containing protein 2 [Solanum tuberosum]
gene.Soltu.DM.09G001000.1	85	116	97	236	175	292	202	330	244	1.89583	2.2975	2.00912	4.683	3.92104	5.9169	4.16807	6.77293	5.64921	5.13345e-07	1.25189	up	[E]	Amino acid transport and metabolism	Molecular Function: prephenate dehydrogenase (NADP+) activity (GO:0004665);; Biological Process: tyrosine biosynthetic process (GO:0006571);; Molecular Function: prephenate dehydrogenase (NAD+) activity (GO:0008977);;	K15227|7.4e-212|sot:102587993|K15227 arogenate dehydrogenase (NADP+), plant [EC:1.3.1.78] | (RefSeq) arogenate dehydrogenase 2, chloroplastic-like	Phenylalanine, tyrosine and tryptophan biosynthesis (ko00400);; Biosynthesis of amino acids (ko01230)	[E]	Amino acid transport and metabolism	Prephenate dehydrogenase	Arogenate dehydrogenase 1, chloroplastic OS=Arabidopsis thaliana OX=3702 GN=TYRAAT1 PE=1 SV=1	E	Amino acid transport and metabolism	PREDICTED: arogenate dehydrogenase 2, chloroplastic-like [Solanum tuberosum]
gene.Soltu.DM.02G030160.1	35	31	25	192	228	250	113	154	174	0.584049	0.453405	0.380361	2.87136	3.86875	3.82987	1.7549	2.38415	3.04651	3.80861e-15	2.54048	up	[E]	Amino acid transport and metabolism	Molecular Function: proline dehydrogenase activity (GO:0004657);; Biological Process: proline catabolic process (GO:0006562);;	K00318|1.7e-282|sot:102588726|K00318 proline dehydrogenase [EC:1.5.5.2] | (RefSeq) proline dehydrogenase 2, mitochondrial-like	Arginine and proline metabolism (ko00330)	[E]	Amino acid transport and metabolism	Proline dehydrogenase	Proline dehydrogenase 1, mitochondrial OS=Arabidopsis thaliana OX=3702 GN=POX1 PE=1 SV=2	E	Amino acid transport and metabolism	PREDICTED: proline dehydrogenase 2, mitochondrial-like [Solanum tuberosum]
gene.Soltu.DM.08G013360.1	435	564	530	1303	1175	1357	1139	1305	1086	6.96559	8.02018	7.89558	18.5582	18.9715	19.7724	16.8977	19.2251	18.068	1.40935e-59	1.2056	up	[P]	Inorganic ion transport and metabolism	Molecular Function: zinc ion transmembrane transporter activity (GO:0005385);; Cellular Component: integral component of membrane (GO:0016021);;	K14709|1.2e-201|sot:102597154|K14709 solute carrier family 39 (zinc transporter), member 1/2/3 | (RefSeq) zinc transporter 4, chloroplastic	--	[P]	Inorganic ion transport and metabolism	ZIP Zinc transporter	Zinc transporter 4, chloroplastic OS=Arabidopsis thaliana OX=3702 GN=ZIP4 PE=2 SV=1	P	Inorganic ion transport and metabolism	PREDICTED: zinc transporter 4, chloroplastic [Solanum tuberosum]
gene.Soltu.DM.01G042590.2	55	118	19	414	329	437	461	199	164	0.814418	1.56817	0.263523	5.54494	4.99363	5.98269	6.42295	2.7461	2.55883	1.93223e-05	2.33689	up	[R]	General function prediction only	Cellular Component: integral component of membrane (GO:0016021);;	K13696|6.9e-251|sot:102594564|K13696 abhydrolase domain-containing protein 1/3 | (RefSeq) embryogenesis-associated protein EMB8-like	--	[R]	General function prediction only	Serine aminopeptidase, S33	Embryogenesis-associated protein EMB8 OS=Picea glauca OX=3330 GN=EMB8 PE=2 SV=1	S	Function unknown	PREDICTED: embryogenesis-associated protein EMB8-like isoform X1 [Solanum tuberosum]
gene.Soltu.DM.06G027980.1	13	3	9	14	39	40	94	125	147	0.357428	0.067378	0.23204	0.339275	1.10545	1.03537	2.46425	3.25048	4.31776	0.000987809	3.15417	up	--	--	Biological Process: response to auxin (GO:0009733);;	K14488|5.4e-79|cann:107875811|K14488 SAUR family protein | (RefSeq) auxin-responsive protein SAUR71-like	Plant hormone signal transduction (ko04075)	--	--	Auxin responsive protein	--	S	Function unknown	PREDICTED: auxin-responsive protein SAUR71-like [Solanum tuberosum]
gene.Soltu.DM.01G006740.1	67	72	68	163	137	160	169	161	152	0.719535	0.686335	0.67737	1.56648	1.48891	1.57558	1.68939	1.60072	1.70284	1.84482e-10	1.1238	up	--	--	Cellular Component: integral component of membrane (GO:0016021);;	K13466|1.1e-56|pmum:103331134|K13466 EIX receptor 1/2 | (RefSeq) LRR receptor-like serine/threonine-protein kinase GSO2	Plant-pathogen interaction (ko04626)	--	--	Leucine rich repeat	Receptor-like protein EIX2 OS=Solanum lycopersicum OX=4081 GN=EIX2 PE=1 SV=2	S	Function unknown	PREDICTED: probable leucine-rich repeat receptor-like protein kinase At2g33170 [Solanum tuberosum]
gene.Soltu.DM.03G025980.1	66	105	124	270	254	266	201	392	179	1.12023	1.59186	1.97528	4.1341	4.4076	4.16166	3.1921	6.20677	3.1917	1.05501e-05	1.33766	up	--	--	Cellular Component: integral component of membrane (GO:0016021);;	K10664|3.4e-225|sot:102578856|K10664 E3 ubiquitin-protein ligase ATL6/9/15/31/42/55 [EC:2.3.2.27] | (RefSeq) E3 ubiquitin-protein ligase ATL6-like	--	[O]	Posttranslational modification, protein turnover, chaperones	Ring finger domain	E3 ubiquitin-protein ligase ATL6 OS=Arabidopsis thaliana OX=3702 GN=ATL6 PE=1 SV=2	O	Posttranslational modification, protein turnover, chaperones	PREDICTED: E3 ubiquitin-protein ligase ATL6-like [Solanum tuberosum]
gene.Soltu.DM.02G014580.2	51	45	10	113	76	200	149	226	174	0.584266	0.453001	0.099349	1.15789	0.880739	2.09378	1.58536	2.39846	2.08447	0.000398319	2.08439	up	[Q]	Secondary metabolites biosynthesis, transport and catabolism	Molecular Function: protein binding (GO:0005515);; Molecular Function: oxidoreductase activity (GO:0016491);; Biological Process: oxidation-reduction process (GO:0055114);;	K05658|2.6e-111|cpep:111781709|K05658 ATP-binding cassette, subfamily B (MDR/TAP), member 1 [EC:7.6.2.2] | (RefSeq) uncharacterized protein LOC111781709	ABC transporters (ko02010)	[QR]	Secondary metabolites biosynthesis, transport and catabolism;; General function prediction only	2OG-Fe(II) oxygenase superfamily	Protein SRG1 OS=Arabidopsis thaliana OX=3702 GN=SRG1 PE=2 SV=1	BK	Chromatin structure and dynamics;; Transcription	PREDICTED: transcription factor GTE12-like [Solanum tuberosum]
gene.Soltu.DM.10G027990.1	162	239	162	403	362	383	415	409	367	3.76875	4.94604	3.52698	8.3804	8.53394	8.13762	8.97791	8.78464	8.90823	2.59341e-12	1.00188	up	--	--	Molecular Function: calcium ion binding (GO:0005509);;	K13448|1.2e-88|sot:102595230|K13448 calcium-binding protein CML | (RefSeq) probable calcium-binding protein CML36	Plant-pathogen interaction (ko04626)	[T]	Signal transduction mechanisms	EF hand	Probable calcium-binding protein CML36 OS=Arabidopsis thaliana OX=3702 GN=CML36 PE=2 SV=1	DTZ	Cell cycle control, cell division, chromosome partitioning;; Signal transduction mechanisms;; Cytoskeleton	PREDICTED: probable calcium-binding protein CML36 [Solanum tuberosum]
gene.Soltu.DM.12G007860.1	17	9	10	59	52	28	48	38	40	0.360852	0.169592	0.196236	1.11303	1.09779	0.536933	0.946278	0.743744	0.866422	0.000230567	1.80604	up	--	--	--	K12173|1.1e-22|gmx:100794341|K12173 BRCA1-A complex subunit BRE | (RefSeq) BRISC and BRCA1-A complex member 2	Homologous recombination (ko03440)	--	--	Thaumatin family	Pathogenesis-related protein R major form OS=Nicotiana tabacum OX=4097 PE=1 SV=1	S	Function unknown	PREDICTED: pathogenesis-related protein R major form-like [Solanum tuberosum]
Solanum_tuberosum_newGene_6035	21	8	18	62	38	62	61	58	38	0.339957	0.102988	0.262397	0.893113	0.609858	0.9064	0.920714	0.868084	0.639529	0.000145138	1.66938	up	--	--	Biological Process: telomere maintenance (GO:0000723);; Molecular Function: DNA helicase activity (GO:0003678);; Molecular Function: ATP binding (GO:0005524);; Biological Process: DNA repair (GO:0006281);; Biological Process: DNA recombination (GO:0006310);;	K15255|6.82e-139|sot:107062046|K15255 ATP-dependent DNA helicase PIF1 [EC:3.6.4.12] | (RefSeq) ATP-dependent DNA helicase RRM3-like	--	[D]	Cell cycle control, cell division, chromosome partitioning	PIF1-like helicase	--	D	Cell cycle control, cell division, chromosome partitioning	PREDICTED: ATP-dependent DNA helicase RRM3-like [Solanum tuberosum]
gene.Soltu.DM.05G016500.1	39	25	50	64	99	71	137	109	146	0.53861	0.305504	0.642166	0.792116	1.38672	0.895	1.765	1.39167	2.11488	0.00729485	1.40967	up	--	--	Molecular Function: aspartic-type endopeptidase activity (GO:0004190);;	K22683|0.0e+00|sot:102595346|K22683 aspartyl protease family protein [EC:3.4.23.-] | (RefSeq) aspartic proteinase nepenthesin-2-like	--	[O]	Posttranslational modification, protein turnover, chaperones	Xylanase inhibitor N-terminal	Aspartyl protease family protein 2 OS=Arabidopsis thaliana OX=3702 GN=APF2 PE=2 SV=1	O	Posttranslational modification, protein turnover, chaperones	PREDICTED: aspartic proteinase nepenthesin-2-like [Solanum tuberosum]
gene.Soltu.DM.01G005180.1	36	22	30	180	177	159	226	222	283	0.887322	0.484202	0.683111	3.98856	4.44607	3.6049	5.22422	5.07758	7.33179	2.27347e-15	2.77024	up	--	--	Molecular Function: hydrolase activity, hydrolyzing O-glycosyl compounds (GO:0004553);; Biological Process: carbohydrate metabolic process (GO:0005975);;	K19891|7.5e-56|ath:AT2G01630|K19891 glucan endo-1,3-beta-glucosidase 1/2/3 [EC:3.2.1.39] | (RefSeq) O-Glycosyl hydrolases family 17 protein	Starch and sucrose metabolism (ko00500)	--	--	Glycosyl hydrolases family 17	Glucan endo-1,3-beta-glucosidase A OS=Solanum lycopersicum OX=4081 PE=1 SV=1	G	Carbohydrate transport and metabolism	PREDICTED: glucan endo-1,3-beta-glucosidase A [Solanum tuberosum]
gene.Soltu.DM.06G028910.2	901	961	1695	619	501	556	576	429	501	25.6782	24.3411	44.9945	15.6946	14.3977	14.4221	15.2095	11.237	14.8292	4.06979e-07	-1.2301	down	--	--	Molecular Function: cysteine-type endopeptidase inhibitor activity (GO:0004869);;	--	--	--	--	Cystatin domain	Multicystatin OS=Solanum tuberosum OX=4113 PE=1 SV=1	S	Function unknown	RecName: Full=Multicystatin; Short=MC [Solanum tuberosum]
gene.Soltu.DM.02G021500.1	418	387	408	649	564	574	1566	1576	1485	7.74929	6.36454	7.04005	10.7139	10.559	9.68864	26.9383	26.9025	28.6269	0.00818417	1.36451	up	[G]	Carbohydrate transport and metabolism	Molecular Function: UDP-glycosyltransferase activity (GO:0008194);;	K22950|7.6e-102|fve:101295404|K22950 acylphloroglucinol glucosyltransferase [EC:2.4.1.358] | (RefSeq) anthocyanidin 3-O-glucosyltransferase 2-like	--	[GC]	Carbohydrate transport and metabolism;; Energy production and conversion	UDP-glucoronosyl and UDP-glucosyl transferase	UDP-glycosyltransferase 43 OS=Pueraria montana var. lobata OX=3893 GN=UGT43 PE=1 SV=2	S	Function unknown	PREDICTED: anthocyanidin 3-O-glucosyltransferase 2-like [Solanum tuberosum]
gene.Soltu.DM.12G029470.2	285	267	98	1091	346	837	740	903	380	6.6204	5.49257	2.11984	22.5688	8.10722	17.701	15.9314	19.3004	9.1746	0.000471411	1.62925	up	[HC]	Coenzyme transport and metabolism;; Energy production and conversion	Molecular Function: FAD binding (GO:0071949);;	K09838|1.9e-12|ccaj:109817363|K09838 zeaxanthin epoxidase [EC:1.14.15.21] | (RefSeq) zeaxanthin epoxidase, chloroplastic-like	Carotenoid biosynthesis (ko00906)	[CR]	Energy production and conversion;; General function prediction only	FAD binding domain	Monooxygenase 2 OS=Arabidopsis thaliana OX=3702 GN=MO2 PE=2 SV=1	CH	Energy production and conversion;; Coenzyme transport and metabolism	PREDICTED: FAD-dependent urate hydroxylase-like isoform X3 [Solanum tuberosum]
gene.Soltu.DM.02G023680.1	45	21	47	135	111	122	81	119	95	0.734701	0.294459	0.716237	1.95621	1.83258	1.80999	1.21602	1.78658	1.61607	2.21202e-05	1.46248	up	--	--	Molecular Function: calmodulin binding (GO:0005516);; Biological Process: defense response (GO:0006952);; Biological Process: response to biotic stimulus (GO:0009607);; Cellular Component: integral component of membrane (GO:0016021);;	K08472|2.2e-304|sot:102594386|K08472 mlo protein | (RefSeq) MLO-like protein 4	--	--	--	Mlo family	MLO-like protein 4 OS=Arabidopsis thaliana OX=3702 GN=MLO4 PE=2 SV=2	D	Cell cycle control, cell division, chromosome partitioning	PREDICTED: MLO-like protein 4 [Solanum tuberosum]
gene.Soltu.DM.02G013810.1	1084	1007	1120	430	319	324	600	639	508	23.5523	19.4295	22.6592	8.31539	6.99437	6.41295	12.0882	12.7819	11.4688	3.95652e-05	-1.24516	down	--	--	Cellular Component: photosystem I (GO:0009522);; Cellular Component: photosystem II (GO:0009523);; Cellular Component: chloroplast thylakoid membrane (GO:0009535);; Biological Process: photosynthesis, light harvesting (GO:0009765);; Cellular Component: integral component of membrane (GO:0016021);; Molecular Function: chlorophyll binding (GO:0016168);; Biological Process: protein-chromophore linka…	K08912|8.8e-153|sot:102589532|K08912 light-harvesting complex II chlorophyll a/b binding protein 1 | (RefSeq) chlorophyll a-b binding protein 1C, chloroplastic-like	Photosynthesis - antenna proteins (ko00196)	--	--	Chlorophyll A-B binding protein	Chlorophyll a-b binding protein 1B, chloroplastic OS=Solanum lycopersicum OX=4081 GN=CAB1B PE=3 SV=1	J	Translation, ribosomal structure and biogenesis	PREDICTED: chlorophyll a-b binding protein 1C, chloroplastic-like [Solanum tuberosum]
Solanum_tuberosum_newGene_2219	147	135	169	292	276	260	424	368	409	3.76385	3.06053	4.02122	6.65144	7.13377	6.05508	10.0816	8.6809	10.8961	0.00019349	1.11768	up	--	--	Molecular Function: nucleic acid binding (GO:0003676);; Biological Process: DNA integration (GO:0015074);;	K12447|3.37e-59|thj:104808371|K12447 UDP-sugar pyrophosphorylase [EC:2.7.7.64] | (RefSeq) uncharacterized protein LOC104808371	Pentose and glucuronate interconversions (ko00040);; Galactose metabolism (ko00052);; Ascorbate and aldarate metabolism (ko00053);; Amino sugar and nucleotide sugar metabolism (ko00520)	[R]	General function prediction only	Integrase core domain	Retrovirus-related Pol polyprotein from transposon TNT 1-94 OS=Nicotiana tabacum OX=4097 PE=2 SV=1	L	Replication, recombination and repair	PREDICTED: uncharacterized protein LOC109221215 [Nicotiana attenuata]
gene.Soltu.DM.07G020580.1	718	840	710	2949	2528	2927	2254	2585	2296	13.9632	14.5062	12.8647	51.0628	49.6327	51.8549	40.6522	46.2931	46.4251	5.7196e-122	1.71099	up	--	--	Molecular Function: molecular_function (GO:0003674);; Molecular Function: catalytic activity (GO:0003824);; Cellular Component: cellular_component (GO:0005575);; Cellular Component: intracellular (GO:0005622);; Cellular Component: cell (GO:0005623);; Cellular Component: cytoplasm (GO:0005737);; Cellular Component: vacuole (GO:0005773);; Cellular Component: Golgi apparatus (GO:0005794);; Cellular …	K23877|5.1e-34|pop:7457851|K23877 xyloglucan O-acetyltransferase | (RefSeq) protein ALTERED XYLOGLUCAN 4	--	--	--	GDSL/SGNH-like Acyl-Esterase family found in Pmr5 and Cas1p	Protein trichome birefringence-like 39 OS=Arabidopsis thaliana OX=3702 GN=TBL39 PE=2 SV=1	S	Function unknown	PREDICTED: protein trichome birefringence-like 39 [Solanum tuberosum]
Solanum_tuberosum_newGene_3839	0	0	0	216	173	192	13	6	0	0	0	0	1.5333	1.35822	1.40739	0.089525	0.037897	0	0.00116163	8.95623	up	--	--	--	K03260|2.24e-62|cann:107844414|K03260 translation initiation factor 4G | (RefSeq) uncharacterized LOC107844414	RNA transport (ko03013)	--	--	gag-polypeptide of LTR copia-type	--	L	Replication, recombination and repair	PREDICTED: uncharacterized protein LOC107060028 [Solanum tuberosum]
gene.Soltu.DM.01G000790.1	1209	1466	1259	4414	3560	4222	1754	1876	1687	44.2948	47.6851	42.9241	143.926	131.584	140.833	59.5554	63.2516	64.2224	0.00324363	1.0678	up	--	--	Cellular Component: integral component of membrane (GO:0016021);;	--	--	--	--	PLAC8 family	Protein PLANT CADMIUM RESISTANCE 2 OS=Arabidopsis thaliana OX=3702 GN=PCR2 PE=1 SV=1	S	Function unknown	PREDICTED: protein PLANT CADMIUM RESISTANCE 2-like [Solanum tuberosum]
gene.Soltu.DM.10G029650.1	24	16	37	268	260	290	163	160	194	0.79255	0.460363	1.10962	7.8759	8.6347	8.69618	4.98856	4.84304	6.65235	7.29766e-19	3.03373	up	--	--	Biological Process: positive regulation of sequence-specific DNA binding transcription factor activity (GO:0051091);;	--	--	--	--	VQ motif	Sigma factor binding protein 1, chloroplastic OS=Arabidopsis thaliana OX=3702 GN=SIB1 PE=1 SV=1	S	Function unknown	PREDICTED: uncharacterized protein LOC102588850 [Solanum tuberosum]
gene.Soltu.DM.09G019110.2	83	107	113	56	22	57	44	20	13	4.07569	4.70364	5.21528	2.45795	1.07688	2.55493	2.01618	0.912135	0.634512	0.00344706	-1.6103	down	--	--	--	K15255|8.9e-36|nta:107769265|K15255 ATP-dependent DNA helicase PIF1 [EC:3.6.4.12] | (RefSeq) uncharacterized LOC107769265	--	--	--	--	--	L	Replication, recombination and repair	PREDICTED: uncharacterized protein LOC107062198 [Solanum tuberosum]
gene.Soltu.DM.12G024700.1	24	25	24	74	52	106	39	57	49	0.300079	0.283732	0.281221	0.831295	0.667075	1.22272	0.461739	0.663184	0.646371	0.00284496	1.2863	up	[R]	General function prediction only	Molecular Function: protein serine/threonine kinase activity (GO:0004674);; Molecular Function: ATP binding (GO:0005524);; Cellular Component: integral component of membrane (GO:0016021);;	K24104|6.7e-71|thj:104799061|K24104 GPN-loop GTPase | (RefSeq) LOW QUALITY PROTEIN: uncharacterized protein LOC104799061	--	--	--	Protein tyrosine and serine/threonine kinase	G-type lectin S-receptor-like serine/threonine-protein kinase CES101 OS=Arabidopsis thaliana OX=3702 GN=CES101 PE=2 SV=2	T	Signal transduction mechanisms	PREDICTED: G-type lectin S-receptor-like serine/threonine-protein kinase CES101 [Solanum tuberosum]
Solanum_tuberosum_newGene_3997	7	8	9	150	158	106	261	266	217	0.133438	0.100467	0.187775	2.93932	3.29682	1.77222	4.69208	5.01723	4.61572	9.15766e-21	4.54946	up	--	--	Cellular Component: integral component of membrane (GO:0016021);;	--	--	--	--	--	--	--	--	--
gene.Soltu.DM.09G004610.1	150	95	103	340	372	558	281	316	440	2.22815	1.24708	1.41399	4.49926	5.58026	7.55123	3.86801	4.31454	6.78732	9.90893e-08	1.65375	up	--	--	Biological Process: protein glycosylation (GO:0006486);; Molecular Function: transferase activity, transferring glycosyl groups (GO:0016757);;	K18789|9.9e-127|nnu:104586170|K18789 xylogalacturonan beta-1,3-xylosyltransferase [EC:2.4.2.41] | (RefSeq) probable glycosyltransferase At5g20260	--	[GMW]	Carbohydrate transport and metabolism;; Cell wall/membrane/envelope biogenesis;; Extracellular structures	Exostosin family	Probable glycosyltransferase At5g03795 OS=Arabidopsis thaliana OX=3702 GN=At5g03795 PE=3 SV=2	S	Function unknown	PREDICTED: probable glycosyltransferase At5g03795 isoform X2 [Solanum tuberosum]
gene.Soltu.DM.09G025340.1	41	37	24	106	125	116	74	60	53	0.744138	0.599542	0.401913	1.72646	2.29269	1.91896	1.25211	0.996185	0.995425	0.00269843	1.30924	up	[QV]	Secondary metabolites biosynthesis, transport and catabolism;; Defense mechanisms	Molecular Function: monooxygenase activity (GO:0004497);; Molecular Function: iron ion binding (GO:0005506);; Molecular Function: oxidoreductase activity, acting on paired donors, with incorporation or reduction of molecular oxygen (GO:0016705);; Molecular Function: heme binding (GO:0020037);;	K23810|3.8e-125|vvi:100254114|K23810 (E)-8-carboxylinalool synthase [EC:1.14.14.-] | (RefSeq) geraniol 8-hydroxylase	Monoterpenoid biosynthesis (ko00902)	[Q]	Secondary metabolites biosynthesis, transport and catabolism	Cytochrome P450	Geraniol 8-hydroxylase OS=Catharanthus roseus OX=4058 GN=CYP76B6 PE=1 SV=1	Q	Secondary metabolites biosynthesis, transport and catabolism	PREDICTED: geraniol 8-hydroxylase-like [Solanum tuberosum]
gene.Soltu.DM.03G011910.1	279	182	256	602	567	634	2187	2346	2012	4.36754	2.53497	3.73546	8.40446	8.97903	9.05905	31.8238	33.8985	32.8266	0.000946492	2.49717	up	--	--	Molecular Function: UDP-glycosyltransferase activity (GO:0008194);;	K16266|9.3e-188|mesc:110628474|K16266 cyanohydrin UDP-glucosyltransferase [EC:2.4.1.-] | (RefSeq) linamarin synthase 1	Cyanoamino acid metabolism (ko00460)	[GC]	Carbohydrate transport and metabolism;; Energy production and conversion	UDP-glucoronosyl and UDP-glucosyl transferase	Linamarin synthase 1 OS=Manihot esculenta OX=3983 GN=UGT85K4 PE=1 SV=1	S	Function unknown	PREDICTED: 7-deoxyloganetin glucosyltransferase-like [Solanum tuberosum]
gene.Soltu.DM.06G019560.1	49	60	52	162	211	212	137	134	162	0.875623	0.954723	0.866665	2.60215	3.84003	3.47898	2.282	2.22999	3.0348	5.09637e-10	1.60262	up	[S]	Function unknown	Cellular Component: caveola (GO:0005901);;	K07192|1.2e-219|sot:102580202|K07192 flotillin | (RefSeq) flotillin-like protein 4	--	[UZ]	Intracellular trafficking, secretion, and vesicular transport;; Cytoskeleton	SPFH domain / Band 7 family	Flotillin-like protein 4 OS=Medicago truncatula OX=3880 GN=FLOT4 PE=2 SV=1	S	Function unknown	PREDICTED: flotillin-like protein 4 [Solanum tuberosum]
gene.Soltu.DM.11G026360.1	36	66	33	182	190	184	101	110	55	0.540738	0.890302	0.466537	2.48388	2.93827	2.56703	1.42597	1.55121	0.871762	0.00141184	1.53758	up	--	--	Cellular Component: integral component of membrane (GO:0016021);;	K16224|2.9e-47|brp:103829497|K16224 senescence-induced receptor-like serine/threonine-protein kinase | (RefSeq) senescence-induced receptor-like serine/threonine-protein kinase isoform X2	MAPK signaling pathway - plant (ko04016);; Plant-pathogen interaction (ko04626)	--	--	Malectin-like domain	Uncharacterized protein At1g24485 OS=Arabidopsis thaliana OX=3702 GN=RWK1 PE=2 SV=2	S	Function unknown	PREDICTED: putative leucine-rich repeat receptor-like protein kinase At2g19210 [Solanum tuberosum]
gene.Soltu.DM.08G017270.1	254	259	219	113	88	86	48	44	41	24.2335	21.9456	19.4167	9.57402	8.41968	7.46955	4.19822	3.82119	3.99932	1.07349e-07	-1.88781	down	--	--	--	--	--	--	--	--	BURP domain-containing protein 17 OS=Oryza sativa subsp. japonica OX=39947 GN=BURP17 PE=2 SV=1	--	--	PREDICTED: uncharacterized protein LOC102588389 isoform X2 [Solanum tuberosum]
gene.Soltu.DM.06G033440.1	16	25	23	88	76	68	227	210	188	0.697478	0.95716	0.912442	3.45055	3.39363	2.71185	9.32604	8.55477	8.6361	3.03832e-06	2.71801	up	[V]	Defense mechanisms	Molecular Function: magnesium ion binding (GO:0000287);; Cellular Component: cytosol (GO:0005829);; Biological Process: dCTP catabolic process (GO:0006253);; Biological Process: DNA protection (GO:0042262);; Molecular Function: dCTP diphosphatase activity (GO:0047840);;	K16904|5.5e-62|sot:102589138|K16904 dCTP diphosphatase [EC:3.6.1.12] | (RefSeq) dCTP pyrophosphatase 1-like	Pyrimidine metabolism (ko00240)	--	--	MazG-like family	--	S	Function unknown	PREDICTED: dCTP pyrophosphatase 1-like [Solanum tuberosum]
gene.Soltu.DM.08G015890.1	21385	24540	22363	13023	10768	12885	12500	11797	10371	599.267	610.539	583.403	324.697	304.406	328.672	324.669	304.176	301.892	1.44026e-98	-1.00173	down	--	--	Cellular Component: photosystem I (GO:0009522);; Cellular Component: photosystem II (GO:0009523);; Cellular Component: chloroplast thylakoid membrane (GO:0009535);; Biological Process: photosynthesis, light harvesting (GO:0009765);; Cellular Component: integral component of membrane (GO:0016021);; Molecular Function: chlorophyll binding (GO:0016168);; Biological Process: protein-chromophore linka…	K08912|3.6e-154|sot:102598575|K08912 light-harvesting complex II chlorophyll a/b binding protein 1 | (RefSeq) chlorophyll a-b binding protein 3C, chloroplastic-like	Photosynthesis - antenna proteins (ko00196)	--	--	Chlorophyll A-B binding protein	Chlorophyll a-b binding protein 3C, chloroplastic OS=Solanum lycopersicum OX=4081 GN=CAB3C PE=3 SV=1	J	Translation, ribosomal structure and biogenesis	PREDICTED: chlorophyll a-b binding protein 3C, chloroplastic-like isoform X1 [Solanum tuberosum]
gene.Soltu.DM.12G009560.1	53	57	66	140	109	151	92	141	118	1.63857	1.57179	1.90681	3.87074	3.41451	4.26792	2.65709	4.03331	3.82508	1.98805e-05	1.02369	up	--	--	Molecular Function: molecular_function (GO:0003674);; Molecular Function: binding (GO:0005488);; Molecular Function: carbohydrate binding (GO:0030246);;	K03188|7.7e-48|dcr:108224146|K03188 urease accessory protein | (RefSeq) uncharacterized protein LOC108224146 isoform X1	--	--	--	Phloem protein 2	F-box protein PP2-B10 OS=Arabidopsis thaliana OX=3702 GN=PP2B10 PE=1 SV=1	--	--	PREDICTED: F-box protein PP2-B10-like [Solanum tuberosum]
Solanum_tuberosum_newGene_1938	44	37	33	152	137	163	130	150	129	0.481603	0.392757	0.288183	1.42409	1.1502	1.65722	1.20854	1.36998	1.4557	3.38337e-20	1.84879	up	--	--	--	--	--	--	--	--	--	--	--	Putative reverse transcriptase, identical [Solanum demissum]
gene.Soltu.DM.09G006830.1	9	17	13	58	44	36	37	53	45	0.21546	0.389421	0.303151	1.33124	1.14016	0.843261	0.883872	1.25923	1.1943	1.47902e-05	1.75211	up	--	--	Molecular Function: DNA binding (GO:0003677);; Cellular Component: nucleus (GO:0005634);;	K09422|2.7e-174|sot:102602587|K09422 transcription factor MYB, plant | (RefSeq) transcription factor RAX2-like	--	[K]	Transcription	Myb-like DNA-binding domain	Transcription factor MYB36 OS=Arabidopsis thaliana OX=3702 GN=MYB36 PE=1 SV=1	K	Transcription	PREDICTED: transcription factor RAX2-like [Solanum tuberosum]
gene.Soltu.DM.05G001630.4	400	457	414	1415	1386	1445	1195	360	1123	3.34295	3.39191	3.22445	10.5408	11.704	11.0148	9.27103	2.7702	9.76563	0.00087741	1.38451	up	--	--	Cellular Component: integral component of membrane (GO:0016021);; Biological Process: regulation of establishment or maintenance of cell polarity regulating cell shape (GO:2000769);;	--	--	--	--	--	WPP domain-interacting tail-anchored protein 2 OS=Arabidopsis thaliana OX=3702 GN=WIT2 PE=1 SV=1	S	Function unknown	PREDICTED: WPP domain-interacting tail-anchored protein 2 [Solanum tuberosum]
gene.Soltu.DM.03G036520.1	477	527	561	277	199	206	282	353	236	9.94047	9.75808	10.8848	5.13871	4.17071	3.89723	5.45066	6.77099	5.09642	9.80062e-07	-1.07479	down	[I]	Lipid transport and metabolism	Molecular Function: oxidoreductase activity (GO:0016491);; Molecular Function: NADP binding (GO:0050661);; Molecular Function: NAD binding (GO:0051287);;	K18121|8.3e-188|sot:102584035|K18121 glyoxylate/succinic semialdehyde reductase [EC:1.1.1.79 1.1.1.-] | (RefSeq) glyoxylate/succinic semialdehyde reductase 2, chloroplastic	Glyoxylate and dicarboxylate metabolism (ko00630);; Butanoate metabolism (ko00650);; Carbon metabolism (ko01200)	[R]	General function prediction only	NAD binding domain of 6-phosphogluconate dehydrogenase	Glyoxylate/succinic semialdehyde reductase 2, chloroplastic OS=Arabidopsis thaliana OX=3702 GN=GLYR2 PE=1 SV=1	I	Lipid transport and metabolism	PREDICTED: glyoxylate/succinic semialdehyde reductase 2, chloroplastic [Solanum tuberosum]
gene.Soltu.DM.01G002240.1	1035	1150	976	378	377	349	318	305	315	25.9452	25.6094	22.7704	8.42532	9.51437	7.96336	7.38634	7.02829	8.19881	5.83091e-61	-1.69266	down	--	--	Molecular Function: oxidoreductase activity (GO:0016491);; Molecular Function: metal ion binding (GO:0046872);;	K04125|3.0e-18|dcr:108225942|K04125 gibberellin 2beta-dioxygenase [EC:1.14.11.13] | (RefSeq) gibberellin 2-beta-dioxygenase 8-like	Diterpenoid biosynthesis (ko00904)	[QR]	Secondary metabolites biosynthesis, transport and catabolism;; General function prediction only	2OG-Fe(II) oxygenase superfamily	Probable 2-oxoglutarate-dependent dioxygenase AOP1.2 OS=Arabidopsis thaliana OX=3702 GN=AOP1.2 PE=2 SV=1	S	Function unknown	PREDICTED: probable 2-oxoglutarate-dependent dioxygenase AOP1.2 [Solanum tuberosum]
gene.Soltu.DM.08G010990.1	46	66	136	751	529	644	2237	2546	2248	0.496943	0.644628	1.3846	7.34906	5.86417	6.44584	22.8085	25.7727	25.6927	4.80129e-08	4.14638	up	--	--	Molecular Function: oxidoreductase activity, acting on single donors with incorporation of molecular oxygen, incorporation of two atoms of oxygen (GO:0016702);; Biological Process: oxylipin biosynthetic process (GO:0031408);; Molecular Function: metal ion binding (GO:0046872);;	K15718|0.0e+00|sot:102577714|K15718 linoleate 9S-lipoxygenase [EC:1.13.11.58] | (RefSeq) POTLX-3, LOX1.5; lipoxygenase	Linoleic acid metabolism (ko00591)	--	--	Lipoxygenase	Probable linoleate 9S-lipoxygenase 5 OS=Solanum tuberosum OX=4113 GN=LOX1.5 PE=2 SV=1	S	Function unknown	probable linoleate 9S-lipoxygenase 5 [Solanum tuberosum]
gene.Soltu.DM.03G030050.1	178	228	206	452	366	416	549	668	516	4.55441	5.16739	4.90042	10.2891	9.44628	9.69467	13.0285	15.7509	13.7344	3.86946e-07	1.22621	up	--	--	Molecular Function: ubiquitin-protein transferase activity (GO:0004842);; Molecular Function: metal ion binding (GO:0046872);;	K11975|1.4e-161|sot:102597290|K11975 E3 ubiquitin-protein ligase RNF144 [EC:2.3.2.31] | (RefSeq) probable E3 ubiquitin-protein ligase RNF217	--	[O]	Posttranslational modification, protein turnover, chaperones	IBR domain, a half RING-finger domain	--	S	Function unknown	PREDICTED: probable E3 ubiquitin-protein ligase RNF217 [Solanum tuberosum]
gene.Soltu.DM.11G008780.1	270	258	303	997	751	861	1414	1520	1608	9.49235	8.05013	9.91603	31.267	26.6886	27.6188	46.2057	49.2888	58.8702	1.06146e-10	2.05845	up	--	--	--	K14948|2.6e-25|jre:109009978|K14948 polypyrimidine tract-binding protein 2 | (RefSeq) polypyrimidine tract-binding protein homolog 3-like isoform X1	--	--	--	Alginate lyase	Citrate-binding protein OS=Hevea brasiliensis OX=3981 GN=CBP PE=1 SV=1	S	Function unknown	PREDICTED: citrate-binding protein-like [Solanum tuberosum]
gene.Soltu.DM.07G023880.1	115	145	125	53	74	46	48	46	40	4.23006	4.72764	4.28603	1.72432	2.72485	1.53983	1.62833	1.53366	1.52554	1.19632e-07	-1.38452	down	--	--	--	--	--	--	--	--	--	--	--	PREDICTED: uncharacterized protein LOC107060130 [Solanum tuberosum]
gene.Soltu.DM.08G027250.1	421	453	324	1113	814	706	1858	1723	1880	20.7239	19.7757	14.8452	48.722	40.3881	31.6057	84.7586	78.0333	96.1257	2.77556e-05	1.72215	up	--	--	Molecular Function: serine-type endopeptidase inhibitor activity (GO:0004867);; Biological Process: response to wounding (GO:0009611);;	K20769|5.0e-07|mesc:110611169|K20769 fatty acid omega-hydroxylase [EC:1.14.-.-] | (RefSeq) cytochrome P450 94A2-like	Cutin, suberine and wax biosynthesis (ko00073)	--	--	Potato inhibitor I family	Ethylene-responsive proteinase inhibitor 1 OS=Solanum lycopersicum OX=4081 PE=3 SV=1	--	--	PREDICTED: ethylene-responsive proteinase inhibitor 1-like [Solanum tuberosum]
gene.Soltu.DM.09G030260.1	150	145	117	579	505	519	644	751	656	2.91036	2.50107	2.11481	9.99443	9.87897	9.16893	11.593	13.409	13.2299	3.11143e-24	2.09196	up	[QV]	Secondary metabolites biosynthesis, transport and catabolism;; Defense mechanisms	Molecular Function: monooxygenase activity (GO:0004497);; Molecular Function: iron ion binding (GO:0005506);; Molecular Function: oxidoreductase activity, acting on paired donors, with incorporation or reduction of molecular oxygen (GO:0016705);; Molecular Function: heme binding (GO:0020037);;	K20617|5.1e-154|lja:Lj3g3v1475790.2|K20617 cytochrome P450 family 71 subfamily A | (RefSeq) Lj3g3v1475790.2; -	--	[Q]	Secondary metabolites biosynthesis, transport and catabolism	Cytochrome P450	Cytochrome P450 83B1 OS=Arabidopsis thaliana OX=3702 GN=CYP83B1 PE=1 SV=1	Q	Secondary metabolites biosynthesis, transport and catabolism	PREDICTED: cytochrome P450 83B1-like [Solanum tuberosum]
gene.Soltu.DM.05G023730.1	57	131	92	542	441	573	859	1107	907	0.381083	0.784258	0.574654	3.26633	3.01093	3.53527	5.39347	6.90618	6.38837	1.72854e-15	2.96005	up	[T]	Signal transduction mechanisms	Molecular Function: ATP binding (GO:0005524);; Cellular Component: integral component of membrane (GO:0016021);; Molecular Function: ATPase activity (GO:0016887);;	K08712|2.1e-139|gsl:Gasu_29800|K08712 ATP-binding cassette, subfamily G (WHITE), member 2, SNQ2 | (RefSeq) ABC transporter, ATP-binding protein	ABC transporters (ko02010)	[Q]	Secondary metabolites biosynthesis, transport and catabolism	ABC-2 type transporter	Pleiotropic drug resistance protein 1 OS=Nicotiana tabacum OX=4097 GN=PDR1 PE=2 SV=1	V	Defense mechanisms	pleiotropic drug resistance protein 1-like [Solanum pennellii]
gene.Soltu.DM.06G014170.2	28	69	43	306	192	233	209	254	125	0.657004	1.46689	0.942036	6.52024	4.64345	5.06754	4.6363	5.59478	3.10193	2.71526e-12	2.17326	up	[R]	General function prediction only	Molecular Function: hydroxyacylglutathione hydrolase activity (GO:0004416);; Biological Process: methylglyoxal catabolic process to D-lactate via S-lactoyl-glutathione (GO:0019243);;	K01069|2.9e-168|sot:102604751|K01069 hydroxyacylglutathione hydrolase [EC:3.1.2.6] | (RefSeq) probable hydroxyacylglutathione hydrolase 2, chloroplastic	Pyruvate metabolism (ko00620)	[R]	General function prediction only	Hydroxyacylglutathione hydrolase C-terminus	Probable hydroxyacylglutathione hydrolase 2, chloroplastic OS=Arabidopsis thaliana OX=3702 GN=GLX2-4 PE=2 SV=1	Q	Secondary metabolites biosynthesis, transport and catabolism	PREDICTED: probable hydroxyacylglutathione hydrolase 2, chloroplastic isoform X2 [Solanum tuberosum]
gene.Soltu.DM.09G023470.1	950	1046	879	2044	1773	1878	3059	3530	2745	17.745	17.3386	15.285	33.9663	33.397	31.9345	52.9573	60.6752	53.2618	1.39286e-06	1.3372	up	[M]	Cell wall/membrane/envelope biogenesis	Cellular Component: integral component of membrane (GO:0016021);;	K08678|2.2e-257|sot:102592280|K08678 UDP-glucuronate decarboxylase [EC:4.1.1.35] | (RefSeq) UDP-glucuronic acid decarboxylase 2	Amino sugar and nucleotide sugar metabolism (ko00520)	[GM]	Carbohydrate transport and metabolism;; Cell wall/membrane/envelope biogenesis	GDP-mannose 4,6 dehydratase	UDP-glucuronic acid decarboxylase 2 OS=Arabidopsis thaliana OX=3702 GN=UXS2 PE=1 SV=1	M	Cell wall/membrane/envelope biogenesis	PREDICTED: UDP-glucuronic acid decarboxylase 2 [Solanum tuberosum]
gene.Soltu.DM.01G005240.1	79	76	77	354	342	320	346	430	343	1.91554	1.64073	1.73421	7.6562	8.39319	7.07768	7.79099	9.61145	8.65861	1.05118e-34	2.14012	up	--	--	Biological Process: carbohydrate metabolic process (GO:0005975);; Molecular Function: glucan endo-1,3-beta-D-glucosidase activity (GO:0042973);;	K19891|1.9e-45|csat:104779479|K19891 glucan endo-1,3-beta-glucosidase 1/2/3 [EC:3.2.1.39] | (RefSeq) glucan endo-1,3-beta-glucosidase 3 isoform X2	Starch and sucrose metabolism (ko00500)	--	--	Glycosyl hydrolases family 17	Glucan endo-1,3-beta-glucosidase A OS=Solanum lycopersicum OX=4081 PE=1 SV=1	G	Carbohydrate transport and metabolism	acidic class II 1,3-beta-glucanase precursor, partial [Solanum tuberosum]
gene.Soltu.DM.08G000220.1	24	75	40	198	145	155	133	60	86	0.345407	0.962848	0.537829	2.57179	2.13068	2.05726	1.7926	0.806916	1.3071	0.00567222	1.43439	up	[O]	Posttranslational modification, protein turnover, chaperones	Molecular Function: serine-type endopeptidase activity (GO:0004252);;	K15333|1.7e-83|nsy:104224633|K15333 tRNA guanosine-2'-O-methyltransferase [EC:2.1.1.34] | (RefSeq) uncharacterized protein LOC104224633	--	--	--	Subtilase family	Subtilisin-like protease OS=Petunia hybrida OX=4102 GN=SBT PE=2 SV=1	O	Posttranslational modification, protein turnover, chaperones	PREDICTED: subtilisin-like protease SBT1.7 [Solanum tuberosum]
gene.Soltu.DM.03G019640.1	42	69	44	127	149	149	353	433	373	0.870935	1.27091	0.844967	2.36992	3.15261	2.852	6.86933	8.3695	8.13889	2.41064e-05	2.33756	up	--	--	Cellular Component: integral component of membrane (GO:0016021);;	K15102|3.9e-204|sot:102596624|K15102 solute carrier family 25 (mitochondrial phosphate transporter), member 3 | (RefSeq) mitochondrial phosphate carrier protein 3, mitochondrial-like	--	[C]	Energy production and conversion	Mitochondrial carrier protein	Mitochondrial phosphate carrier protein 3, mitochondrial OS=Arabidopsis thaliana OX=3702 GN=MPT3 PE=1 SV=1	S	Function unknown	PREDICTED: mitochondrial phosphate carrier protein 3, mitochondrial-like [Solanum tuberosum]
gene.Soltu.DM.10G017360.1	38	39	60	131	128	108	74	108	97	0.518051	0.474872	0.757129	1.58778	1.7633	1.33984	0.932076	1.35332	1.37254	0.00018719	1.16734	up	--		Molecular Function: protein kinase activity (GO:0004672);; Molecular Function: ATP binding (GO:0005524);; Cellular Component: integral component of membrane (GO:0016021);; Molecular Function: carbohydrate binding (GO:0030246);;	K22133|2.5e-93|egr:104443802|K22133 oxalate---CoA ligase [EC:6.2.1.8] | (RefSeq) oxalate--CoA ligase	Glyoxylate and dicarboxylate metabolism (ko00630)	--	--	Legume lectin domain	L-type lectin-domain containing receptor kinase IX.1 OS=Arabidopsis thaliana OX=3702 GN=LECRK91 PE=1 SV=1	T	Signal transduction mechanisms	PREDICTED: L-type lectin-domain containing receptor kinase IX.1-like [Solanum tuberosum]
gene.Soltu.DM.04G005520.1	20	21	19	58	46	37	56	50	45	0.456159	0.441562	0.398853	1.21732	1.09525	0.80123	1.23177	1.08268	1.09758	0.000638882	1.22084	up	[R]	General function prediction only	Biological Process: defense response (GO:0006952);; Molecular Function: ADP binding (GO:0043531);;	K13457|2.8e-63|egr:104446734|K13457 disease resistance protein RPM1 | (RefSeq) disease resistance protein RPM1	Plant-pathogen interaction (ko04626)	[T]	Signal transduction mechanisms	NB-ARC domain	Disease resistance protein RPP13 OS=Arabidopsis thaliana OX=3702 GN=RPP13 PE=2 SV=2	S	Function unknown	HJTR2GH1 protein [Solanum hjertingii]
gene.Soltu.DM.02G014550.1	158	181	222	807	770	793	313	427	377	1.73267	1.76029	2.27	7.89478	8.53957	7.93435	3.18527	4.3172	4.29879	1.41337e-05	1.55184	up	[Q]	Secondary metabolites biosynthesis, transport and catabolism	Molecular Function: oxidoreductase activity (GO:0016491);; Molecular Function: metal ion binding (GO:0046872);;	K05658|7.3e-189|cpep:111781709|K05658 ATP-binding cassette, subfamily B (MDR/TAP), member 1 [EC:7.6.2.2] | (RefSeq) uncharacterized protein LOC111781709	ABC transporters (ko02010)	[QR]	Secondary metabolites biosynthesis, transport and catabolism;; General function prediction only	2OG-Fe(II) oxygenase superfamily	Protein SRG1 OS=Arabidopsis thaliana OX=3702 GN=SRG1 PE=2 SV=1	S	Function unknown	uncharacterized protein LOC104104482 [Nicotiana tomentosiformis]
gene.Soltu.DM.04G029340.1	551	565	476	2151	2053	2042	892	892	777	5.06069	4.60871	4.06804	17.5927	19.0333	17.0857	7.59879	7.54066	7.41172	0.000394088	1.37826	up	[M]	Cell wall/membrane/envelope biogenesis	Molecular Function: protein kinase activity (GO:0004672);; Molecular Function: ATP binding (GO:0005524);; Cellular Component: integral component of membrane (GO:0016021);;	K13415|5.8e-83|han:110929858|K13415 protein brassinosteroid insensitive 1 [EC:2.7.10.1 2.7.11.1] | (RefSeq) systemin receptor SR160-like	Plant hormone signal transduction (ko04075)	--	--	Leucine rich repeat	MDIS1-interacting receptor like kinase 2 OS=Arabidopsis thaliana OX=3702 GN=MIK2 PE=1 SV=3	S	Function unknown	PREDICTED: probable LRR receptor-like serine/threonine-protein kinase At4g08850 [Solanum tuberosum]
gene.Soltu.DM.12G029530.2	227	268	242	891	794	792	976	1060	771	4.63742	4.86181	4.61401	16.2393	16.4136	14.7725	18.5369	19.9803	16.4052	1.24868e-37	1.78176	up	[HC]	Coenzyme transport and metabolism;; Energy production and conversion	Molecular Function: FAD binding (GO:0071949);;	K09838|2.8e-17|ccaj:109817363|K09838 zeaxanthin epoxidase [EC:1.14.15.21] | (RefSeq) zeaxanthin epoxidase, chloroplastic-like	Carotenoid biosynthesis (ko00906)	[CR]	Energy production and conversion;; General function prediction only	FAD binding domain	Monooxygenase 2 OS=Arabidopsis thaliana OX=3702 GN=MO2 PE=2 SV=1	CH	Energy production and conversion;; Coenzyme transport and metabolism	PREDICTED: FAD-dependent urate hydroxylase-like [Solanum tuberosum]
gene.Soltu.DM.08G026500.1	444	463	345	1889	1560	1846	1751	1852	1597	5.60258	5.18746	4.05495	21.2375	19.8758	21.2306	20.5084	21.5248	20.9517	3.11834e-92	2.00279	up	[O]	Posttranslational modification, protein turnover, chaperones	Molecular Function: serine-type endopeptidase activity (GO:0004252);;	K15333|7.4e-88|nsy:104224633|K15333 tRNA guanosine-2'-O-methyltransferase [EC:2.1.1.34] | (RefSeq) uncharacterized protein LOC104224633	--	--	--	Subtilase family	Subtilisin-like protease 4 OS=Lotus japonicus OX=34305 GN=SBTM4 PE=2 SV=1	O	Posttranslational modification, protein turnover, chaperones	PREDICTED: subtilisin-like protease SBT1.2 [Solanum tuberosum]
gene.Soltu.DM.08G005330.1	292	338	198	728	717	606	661	662	520	2.07835	2.13815	1.30798	4.61041	5.1539	3.9282	4.36195	4.3374	3.84212	2.20415e-11	1.1727	up	--	--	Molecular Function: protein binding (GO:0005515);;	K14494|4.3e-32|pop:18106830|K14494 DELLA protein | (RefSeq) uncharacterized protein LOC18106830	Plant hormone signal transduction (ko04075)	--	--	RWP-RK domain	Protein NLP9 OS=Arabidopsis thaliana OX=3702 GN=NLP9 PE=2 SV=1	S	Function unknown	PREDICTED: protein NLP9-like [Solanum tuberosum]
gene.Soltu.DM.07G019550.1	19	30	17	77	52	67	259	285	252	0.703014	1.01256	0.603002	2.6116	2.00194	2.31837	9.20496	10.0578	10.0489	9.01952e-05	2.89912	up	[E]	Amino acid transport and metabolism	Biological Process: cellular amino acid metabolic process (GO:0006520);; Molecular Function: carboxy-lyase activity (GO:0016831);; Molecular Function: pyridoxal phosphate binding (GO:0030170);;	K01593|5.2e-124|sot:102600956|K01593 aromatic-L-amino-acid/L-tryptophan decarboxylase [EC:4.1.1.28 4.1.1.105] | (RefSeq) aromatic-L-amino-acid decarboxylase-like	Tyrosine metabolism (ko00350);; Phenylalanine metabolism (ko00360);; Tryptophan metabolism (ko00380);; Isoquinoline alkaloid biosynthesis (ko00950);; Betalain biosynthesis (ko00965)	[E]	Amino acid transport and metabolism	Pyridoxal-dependent decarboxylase conserved domain	Tryptophan decarboxylase TDC2 OS=Camptotheca acuminata OX=16922 GN=TDC2 PE=1 SV=1	E	Amino acid transport and metabolism	PREDICTED: aromatic-L-amino-acid decarboxylase-like [Solanum tuberosum]
Solanum_tuberosum_newGene_5924	23	7	4	49	73	52	44	31	42	1.47475	0.356363	0.234318	2.85857	4.83303	3.0623	2.67778	1.87171	2.86854	0.00340659	2.0064	up	--	--	Cellular Component: integral component of membrane (GO:0016021);;	--	--	--	--	Sar8.2 family	--	--	--	hypothetical protein EJD97_020159 [Solanum chilense]
gene.Soltu.DM.07G000450.1	227	256	200	143	114	134	100	59	94	10.1104	10.1057	8.29392	5.67815	5.09879	5.43914	4.12844	2.41278	4.31427	7.23031e-05	-1.15339	down	--	--	Biological Process: defense response (GO:0006952);;	--	--	--	--	Pathogenesis-related protein Bet v 1 family	Norbelladine synthase OS=Narcissus pseudonarcissus OX=39639 GN=NBS PE=1 SV=1	--	--	PREDICTED: S-norcoclaurine synthase 1-like [Solanum tuberosum]
gene.Soltu.DM.11G020990.1	93	69	78	25	39	33	33	22	21	1.35482	0.884175	1.05195	0.31965	0.574232	0.434688	0.446209	0.286077	0.317969	9.65146e-06	-1.54656	down	[QV]	Secondary metabolites biosynthesis, transport and catabolism;; Defense mechanisms	Molecular Function: monooxygenase activity (GO:0004497);; Molecular Function: iron ion binding (GO:0005506);; Cellular Component: integral component of membrane (GO:0016021);; Molecular Function: oxidoreductase activity, acting on paired donors, with incorporation or reduction of molecular oxygen (GO:0016705);; Molecular Function: heme binding (GO:0020037);;	K13083|4.3e-264|sot:102577676|K13083 flavonoid 3',5'-hydroxylase [EC:1.14.14.81] | (RefSeq) P, F3'5'H; flavonoid 3',5'-hydroxylase	Flavonoid biosynthesis (ko00941);; Flavone and flavonol biosynthesis (ko00944)	[Q]	Secondary metabolites biosynthesis, transport and catabolism	Cytochrome P450	Flavonoid 3',5'-hydroxylase OS=Solanum melongena OX=4111 GN=CYP75A2 PE=2 SV=1	Q	Secondary metabolites biosynthesis, transport and catabolism	flavonoid 3',5'-hydroxylase [Solanum tuberosum]
gene.Soltu.DM.03G037470.1	10	21	30	72	70	67	139	168	135	0.232686	0.437614	0.64307	1.50119	1.66385	1.44041	3.03821	3.65476	3.31703	1.78104e-05	2.38319	up	--	--	Cellular Component: integral component of membrane (GO:0016021);;	K16286|2.5e-27|ats:109777560|K16286 E3 ubiquitin-protein ligase EL5 [EC:2.3.2.27] | (RefSeq) LOC109777560; E3 ubiquitin-protein ligase EL5-like	--	[O]	Posttranslational modification, protein turnover, chaperones	Ring finger domain	RING-H2 finger protein ATL60 OS=Arabidopsis thaliana OX=3702 GN=ATL60 PE=2 SV=1	O	Posttranslational modification, protein turnover, chaperones	PREDICTED: RING-H2 finger protein ATL60-like [Solanum tuberosum]
gene.Soltu.DM.09G025840.1	69851	81260	90695	27293	25014	29913	46381	40825	42131	4044.29	4177.02	4888.46	1405.99	1460.96	1576.48	2488.96	2174.84	2533.91	2.72e-06	-1.23772	down	--	--	Molecular Function: serine-type endopeptidase inhibitor activity (GO:0004867);; Biological Process: response to wounding (GO:0009611);;	K20769|1.0e-06|mesc:110611169|K20769 fatty acid omega-hydroxylase [EC:1.14.-.-] | (RefSeq) cytochrome P450 94A2-like	Cutin, suberine and wax biosynthesis (ko00073)	--	--	Potato inhibitor I family	Wound-induced proteinase inhibitor 1 OS=Solanum tuberosum OX=4113 PE=1 SV=2	S	Function unknown	PREDICTED: proteinase inhibitor 1 PPI2C1A isoform X1 [Solanum tuberosum]
gene.Soltu.DM.01G019830.1	9	10	10	37	28	40	32	17	21	0.284267	0.307503	0.312331	1.15223	0.982701	1.27595	1.01964	0.537665	0.754174	0.00447751	1.51921	up	--	--	Molecular Function: hydrolase activity, hydrolyzing O-glycosyl compounds (GO:0004553);; Biological Process: carbohydrate metabolic process (GO:0005975);;	K19892|5.2e-37|brp:103870118|K19892 glucan endo-1,3-beta-glucosidase 4 [EC:3.2.1.39] | (RefSeq) glucan endo-1,3-beta-glucosidase 4	Starch and sucrose metabolism (ko00500)	--	--	Glycosyl hydrolases family 17	Glucan endo-1,3-beta-glucosidase, basic vacuolar isoform GLB OS=Nicotiana tabacum OX=4097 PE=2 SV=1	--	--	PREDICTED: LOW QUALITY PROTEIN: glucan endo-1,3-beta-glucosidase, basic vacuolar isoform-like [Solanum tuberosum]
Solanum_tuberosum_newGene_500	15	7	4	156	133	176	79	59	58	0.322336	0.132805	0.078555	3.06812	2.96115	3.52938	1.60617	1.18932	1.33016	1.4766e-09	3.55974	up	--	--	Molecular Function: nucleic acid binding (GO:0003676);; Molecular Function: zinc ion binding (GO:0008270);; Biological Process: DNA integration (GO:0015074);;	--	--	[R]	General function prediction only	Retrotransposon gag protein	--	L	Replication, recombination and repair	PREDICTED: uncharacterized protein LOC102593574, partial [Solanum tuberosum]
gene.Soltu.DM.08G006160.1	152	163	164	320	252	319	358	419	366	2.06045	1.95874	2.07799	3.87632	3.45383	3.94382	4.51292	5.23838	5.16542	2.6391e-06	1.02848	up	--	--	Cellular Component: integral component of membrane (GO:0016021);;	--	--	[R]	General function prediction only	Ankyrin repeats (3 copies)	Ankyrin repeat-containing protein At5g02620 OS=Arabidopsis thaliana OX=3702 GN=At5g02620 PE=1 SV=1	S	Function unknown	PREDICTED: ankyrin repeat-containing protein At5g02620-like [Solanum tuberosum]
gene.Soltu.DM.06G017220.1	116	170	119	217	193	279	370	366	276	2.34571	3.05229	2.23387	3.90896	3.93696	5.14406	6.96021	6.82015	5.82016	0.00125253	1.02439	up	[QV]	Secondary metabolites biosynthesis, transport and catabolism;; Defense mechanisms	Molecular Function: monooxygenase activity (GO:0004497);; Molecular Function: iron ion binding (GO:0005506);; Molecular Function: oxidoreductase activity, acting on paired donors, with incorporation or reduction of molecular oxygen (GO:0016705);; Molecular Function: heme binding (GO:0020037);;	K15472|1.1e-154|nau:109237629|K15472 premnaspirodiene oxygenase [EC:1.14.14.151] | (RefSeq) premnaspirodiene oxygenase	Sesquiterpenoid and triterpenoid biosynthesis (ko00909)	[Q]	Secondary metabolites biosynthesis, transport and catabolism	Cytochrome P450	Premnaspirodiene oxygenase OS=Hyoscyamus muticus OX=35626 GN=CYP71D55 PE=1 SV=1	Q	Secondary metabolites biosynthesis, transport and catabolism	premnaspirodiene oxygenase-like [Solanum pennellii]
gene.Soltu.DM.03G002240.1	224	501	159	32	18	28	35	35	25	2.72094	5.41773	1.79991	0.338715	0.214016	0.308973	0.384089	0.390407	0.310758	4.18402e-18	-3.38769	down	--	--	Molecular Function: magnesium ion binding (GO:0000287);; Biological Process: response to singlet oxygen (GO:0000304);; Biological Process: response to wounding (GO:0009611);; Biological Process: response to bacterium (GO:0009617);; Biological Process: response to jasmonic acid (GO:0009753);; Molecular Function: terpene synthase activity (GO:0010333);; Biological Process: diterpenoid biosynthetic …	K17982|0.0e+00|sot:102599238|K17982 geranyllinalool synthase [EC:4.2.3.144] | (RefSeq) (E,E)-geranyllinalool synthase	Diterpenoid biosynthesis (ko00904)	--	--	Terpene synthase family, metal binding domain	(E,E)-geranyllinalool synthase OS=Arabidopsis thaliana OX=3702 GN=GES PE=1 SV=1	S	Function unknown	PREDICTED: (E,E)-geranyllinalool synthase [Solanum tuberosum]
gene.Soltu.DM.03G027870.1	35	37	24	101	67	80	82	115	70	1.00418	0.92971	0.632654	2.6008	1.93863	2.11078	2.18676	3.05508	2.09533	8.32202e-06	1.35494	up	--	--	Molecular Function: calmodulin binding (GO:0005516);;	--	--	--	--	Calmodulin binding protein-like	Calmodulin-binding protein 60 B OS=Arabidopsis thaliana OX=3702 GN=CBP60B PE=2 SV=1	--	--	PREDICTED: calmodulin-binding protein 60 A-like isoform X2 [Solanum tuberosum]
gene.Soltu.DM.12G019540.1	1582	1742	1612	793	747	880	864	822	753	74.9389	73.2643	71.0777	33.4062	35.6774	37.9351	37.9058	35.8018	37.0346	9.94038e-42	-1.08505	down	--	--	--	--	--	--	--	--	--	S	Function unknown	PREDICTED: uncharacterized protein LOC102595503 [Solanum tuberosum]
gene.Soltu.DM.05G025310.1	0	12	0	64	33	58	45	60	49	0	0.328228	0	1.86056	1.08214	1.72973	1.3714	1.80156	1.66682	4.59833e-05	3.68449	up	--	--	--	--	--	--	--	Plant protein 1589 of unknown function (A_thal_3526)	--	S	Function unknown	PREDICTED: uncharacterized protein LOC102600127 isoform X1 [Solanum tuberosum]
gene.Soltu.DM.07G005690.1	414	480	367	155	118	180	174	185	186	6.48937	6.67493	5.34692	2.16029	1.85464	2.55707	2.52775	2.66663	3.01982	2.54337e-12	-1.39255	down	[QV]	Secondary metabolites biosynthesis, transport and catabolism;; Defense mechanisms	Molecular Function: monooxygenase activity (GO:0004497);; Molecular Function: iron ion binding (GO:0005506);; Cellular Component: integral component of membrane (GO:0016021);; Molecular Function: oxidoreductase activity, acting on paired donors, with incorporation or reduction of molecular oxygen (GO:0016705);; Molecular Function: heme binding (GO:0020037);;	K13260|1.7e-123|nau:109240371|K13260 isoflavone/4'-methoxyisoflavone 2'-hydroxylase [EC:1.14.14.90 1.14.14.89] | (RefSeq) isoflavone 2'-hydroxylase-like	Isoflavonoid biosynthesis (ko00943)	[Q]	Secondary metabolites biosynthesis, transport and catabolism	Cytochrome P450	Cytochrome P450 81C13 OS=Catharanthus roseus OX=4058 GN=CYP81C13 PE=2 SV=1	Q	Secondary metabolites biosynthesis, transport and catabolism	PREDICTED: isoflavone 3'-hydroxylase-like [Solanum tuberosum]
gene.Soltu.DM.12G000820.1	0	11	8	54	53	53	47	57	63	0	0.211099	0.161238	1.11184	1.23397	1.12796	1.01006	1.21388	1.51054	9.14286e-09	3.07358	up	--	--	Molecular Function: protein binding (GO:0005515);; Cellular Component: integral component of membrane (GO:0016021);;	K13466|5.7e-11|vvi:104882119|K13466 EIX receptor 1/2 | (RefSeq) receptor-like protein 12	Plant-pathogen interaction (ko04626)	[R]	General function prediction only	Leucine rich repeat	Receptor like protein 27 OS=Arabidopsis thaliana OX=3702 GN=RLP27 PE=2 SV=1	S	Function unknown	PREDICTED: leucine-rich repeat receptor protein kinase EMS1-like, partial [Solanum tuberosum]
gene.Soltu.DM.03G003950.1	54	30	37	95	84	108	142	132	202	0.705685	0.346927	0.441646	1.10319	1.0988	1.27943	1.72013	1.57817	2.73361	0.00087741	1.60385	up	[MDT]	Cell wall/membrane/envelope biogenesis;; Cell cycle control, cell division, chromosome partitioning;; Signal transduction mechanisms	Molecular Function: ATP binding (GO:0005524);;	K08900|1.1e-231|sot:102596396|K08900 mitochondrial chaperone BCS1 | (RefSeq) protein HYPER-SENSITIVITY-RELATED 4-like	--	[O]	Posttranslational modification, protein turnover, chaperones	Domain associated at C-terminal with AAA	Protein HYPER-SENSITIVITY-RELATED 4 OS=Arabidopsis thaliana OX=3702 GN=HSR4 PE=2 SV=1	O	Posttranslational modification, protein turnover, chaperones	PREDICTED: AAA-ATPase At3g50940-like [Solanum tuberosum]
gene.Soltu.DM.08G003230.1	54	118	100	353	302	393	152	173	142	0.650379	1.27351	1.1302	3.82522	3.70944	4.35951	1.71148	1.93588	1.78953	0.00165335	1.40623	up	[IR]	Lipid transport and metabolism;; General function prediction only	Cellular Component: membrane (GO:0016020);; Molecular Function: long-chain-alcohol oxidase activity (GO:0046577);; Molecular Function: flavin adenine dinucleotide binding (GO:0050660);;	K17756|0.0e+00|sot:102598900|K17756 long-chain-alcohol oxidase [EC:1.1.3.20] | (RefSeq) long-chain-alcohol oxidase FAO4A-like	--	--	--	GMC oxidoreductase	Long-chain-alcohol oxidase FAO4A OS=Arabidopsis thaliana OX=3702 GN=FAO4A PE=3 SV=2	E	Amino acid transport and metabolism	PREDICTED: long-chain-alcohol oxidase FAO4A-like [Solanum tuberosum]
gene.Soltu.DM.04G005710.1	21	19	20	42	38	39	52	49	41	0.371775	0.285179	0.317688	0.648273	0.676315	0.618674	0.839026	0.796232	0.745876	0.0045865	1.05775	up	[R]	General function prediction only	Biological Process: defense response (GO:0006952);; Molecular Function: ADP binding (GO:0043531);;	K13457|4.8e-82|vvi:100251642|K13457 disease resistance protein RPM1 | (RefSeq) disease resistance protein RPM1	Plant-pathogen interaction (ko04626)	[T]	Signal transduction mechanisms	NB-ARC domain	Disease resistance protein RPP13 OS=Arabidopsis thaliana OX=3702 GN=RPP13 PE=2 SV=2	S	Function unknown	EDNR2GH3 protein [Solanum x edinense]
gene.Soltu.DM.02G026410.1	1387	1597	1554	3050	2791	3011	3483	4124	3214	18.7281	19.1416	19.5318	36.6499	38.0297	37.0177	43.5966	51.2511	45.0891	1.73473e-12	1.05914	up	[EH]	Amino acid transport and metabolism;; Coenzyme transport and metabolism	Molecular Function: magnesium ion binding (GO:0000287);; Molecular Function: catalytic activity (GO:0003824);; Cellular Component: cytosol (GO:0005829);; Molecular Function: thiamine pyrophosphate binding (GO:0030976);;	K12261|0.0e+00|sot:102604551|K12261 2-hydroxyacyl-CoA lyase 1 [EC:4.1.-.-] | (RefSeq) 2-hydroxyacyl-CoA lyase	Peroxisome (ko04146)	[EH]	Amino acid transport and metabolism;; Coenzyme transport and metabolism	Thiamine pyrophosphate enzyme, N-terminal TPP binding domain	2-hydroxyacyl-CoA lyase OS=Arabidopsis thaliana OX=3702 GN=HACL PE=1 SV=1	E	Amino acid transport and metabolism	PREDICTED: 2-hydroxyacyl-CoA lyase [Solanum tuberosum]
Solanum_tuberosum_newGene_3456	13	16	2	46	44	24	42	28	33	0.540943	0.611017	0.082823	1.8193	1.97714	0.947692	1.71591	1.11646	1.48827	0.00867863	1.75963	up	--	--	--	--	--	--	--	--	--	S	Function unknown	hypothetical protein T459_00128 [Capsicum annuum]
gene.Soltu.DM.07G016750.1	3493	3656	3868	13031	11624	12234	12768	14699	12426	75.4912	70.1418	77.8242	250.576	253.42	240.669	255.756	292.304	278.969	1.03854e-68	1.73856	up	[Q]	Secondary metabolites biosynthesis, transport and catabolism	Molecular Function: oxidoreductase activity (GO:0016491);; Molecular Function: metal ion binding (GO:0046872);;	K05933|3.3e-183|sot:102577917|K05933 aminocyclopropanecarboxylate oxidase [EC:1.14.17.4] | (RefSeq) ACO1; 1-aminocyclopropane-1-carboxylate oxidase	Cysteine and methionine metabolism (ko00270)	[QR]	Secondary metabolites biosynthesis, transport and catabolism;; General function prediction only	2OG-Fe(II) oxygenase superfamily	1-aminocyclopropane-1-carboxylate oxidase 1 OS=Solanum lycopersicum OX=4081 GN=ACO1 PE=2 SV=2	S	Function unknown	1-aminocyclopropane-1-carboxylate oxidase [Solanum tuberosum]
gene.Soltu.DM.09G030430.2	502	964	451	296	212	238	146	187	90	20.6482	35.2512	17.2809	10.8182	8.77826	8.9026	5.57399	7.07586	3.83159	4.57713e-07	-1.78076	down	--	--	--	--	--	--	--	Glycine rich protein family	Glycine-rich protein OS=Nicotiana tabacum OX=4097 GN=GRP PE=2 SV=1	--	--	PREDICTED: metacaspase-1-like isoform X1 [Solanum tuberosum]
gene.Soltu.DM.08G018130.1	33	41	25	251	214	262	113	90	87	0.683089	0.769686	0.474242	4.71768	4.55121	5.03055	2.2131	1.73944	1.89321	1.3862e-06	2.27592	up	--	--	Molecular Function: aspartic-type endopeptidase activity (GO:0004190);;	K22683|2.8e-39|ppp:112277291|K22683 aspartyl protease family protein [EC:3.4.23.-] | (RefSeq) aspartyl protease family protein 2-like	--	[O]	Posttranslational modification, protein turnover, chaperones	Xylanase inhibitor C-terminal	Aspartic proteinase nepenthesin-2 OS=Nepenthes gracilis OX=150966 GN=nep2 PE=1 SV=1	O	Posttranslational modification, protein turnover, chaperones	PREDICTED: protein ASPARTIC PROTEASE IN GUARD CELL 1-like [Solanum tuberosum]
gene.Soltu.DM.01G029100.1	0	0	0	0	201	241	116	276	217	0	0	0	0	5.85673	6.36081	3.10017	7.34699	6.52995	1.77105e-05	9.85736	up	[O]	Posttranslational modification, protein turnover, chaperones	Biological Process: response to acid chemical (GO:0001101);; Molecular Function: molecular_function (GO:0003674);; Molecular Function: catalytic activity (GO:0003824);; Molecular Function: glutathione transferase activity (GO:0004364);; Molecular Function: protein binding (GO:0005515);; Cellular Component: cellular_component (GO:0005575);; Cellular Component: intracellular (GO:0005622);; Cellular…	K00799|1.4e-130|sot:102591927|K00799 glutathione S-transferase [EC:2.5.1.18] | (RefSeq) glutathione transferase GST 23-like	Glutathione metabolism (ko00480)	[O]	Posttranslational modification, protein turnover, chaperones	Glutathione S-transferase, N-terminal domain	Glutathione transferase GST 23 OS=Zea mays OX=4577 PE=2 SV=1	O	Posttranslational modification, protein turnover, chaperones	PREDICTED: glutathione transferase GST 23-like [Solanum tuberosum]
gene.Soltu.DM.09G021770.1	31	77	47	247	253	397	222	162	145	0.736504	1.64012	1.03644	5.29487	6.15515	8.71897	4.97125	3.59772	3.61829	1.29067e-08	2.14421	up	--	--	--	--	--	--	--	--	--	S	Function unknown	PREDICTED: basic proline-rich protein-like isoform X3 [Solanum tuberosum]
gene.Soltu.DM.04G027770.1	142	141	72	284	293	377	208	296	260	4.27055	3.78927	2.01158	7.63793	8.94834	10.3806	5.82578	8.22562	8.14944	2.22126e-05	1.20776	up	[R]	General function prediction only	Molecular Function: chitinase activity (GO:0004568);; Biological Process: carbohydrate metabolic process (GO:0005975);; Biological Process: chitin catabolic process (GO:0006032);; Molecular Function: chitin binding (GO:0008061);; Biological Process: cell wall macromolecule catabolic process (GO:0016998);;	K01183|1.7e-167|sot:102583127|K01183 chitinase [EC:3.2.1.14] | (RefSeq) endochitinase EP3	Amino sugar and nucleotide sugar metabolism (ko00520)	[R]	General function prediction only	Chitinase class I	Endochitinase EP3 OS=Arabidopsis thaliana OX=3702 GN=EP3 PE=1 SV=1	G	Carbohydrate transport and metabolism	PREDICTED: endochitinase EP3 [Solanum tuberosum]
gene.Soltu.DM.10G013100.1	7	11	5	101	87	88	30	24	49	0.091594	0.122902	0.050604	1.21847	1.18956	1.07966	0.367115	0.290172	0.690777	1.00833e-05	2.97375	up	--		Molecular Function: protein kinase activity (GO:0004672);; Molecular Function: ATP binding (GO:0005524);; Cellular Component: integral component of membrane (GO:0016021);; Molecular Function: carbohydrate binding (GO:0030246);;	K22133|2.1e-92|egr:104443802|K22133 oxalate---CoA ligase [EC:6.2.1.8] | (RefSeq) oxalate--CoA ligase	Glyoxylate and dicarboxylate metabolism (ko00630)	--	--	Legume lectin domain	L-type lectin-domain containing receptor kinase IX.1 OS=Arabidopsis thaliana OX=3702 GN=LECRK91 PE=1 SV=1	T	Signal transduction mechanisms	PREDICTED: L-type lectin-domain containing receptor kinase IX.1-like [Solanum tuberosum]
gene.Soltu.DM.07G012020.1	50	98	50	209	164	233	295	336	312	1.25507	2.20453	1.16855	4.72314	4.21218	5.39308	6.96075	7.86041	8.25511	5.38051e-08	1.93932	up	[I]	Lipid transport and metabolism	Molecular Function: hydrolase activity (GO:0016787);;	K22097|6.7e-65|psom:113322812|K22097 3-O-acetylpapaveroxine carboxylesterase [EC:3.1.1.105] | (RefSeq) carboxylesterase 1-like	Isoquinoline alkaloid biosynthesis (ko00950)	[V]	Defense mechanisms	alpha/beta hydrolase fold	Probable carboxylesterase 120 OS=Arabidopsis thaliana OX=3702 GN=CXE20 PE=2 SV=1	I	Lipid transport and metabolism	PREDICTED: probable carboxylesterase 120 isoform X2 [Solanum tuberosum]
gene.Soltu.DM.07G007860.2	127	140	136	63	39	62	22	22	17	1.98583	1.94247	1.98496	0.875948	0.615911	0.873976	0.318243	0.314582	0.264035	5.09043e-05	-1.93885	down	--	--	--	K15255|1.9e-36|nta:107769265|K15255 ATP-dependent DNA helicase PIF1 [EC:3.6.4.12] | (RefSeq) uncharacterized LOC107769265	--	--	--	Replication factor-A C terminal domain	--	L	Replication, recombination and repair	PREDICTED: uncharacterized protein LOC107060683 [Solanum tuberosum]
gene.Soltu.DM.08G018370.1	1317	1450	1492	763	712	788	453	895	269	13.7059	13.3931	14.4499	7.06203	7.47336	7.46495	4.36583	8.56079	2.90263	0.000207938	-1.22381	down	--	--	Molecular Function: molecular_function (GO:0003674);; Molecular Function: nucleic acid binding (GO:0003676);; Molecular Function: RNA binding (GO:0003723);; Molecular Function: catalytic activity (GO:0003824);; Molecular Function: nuclease activity (GO:0004518);; Molecular Function: endonuclease activity (GO:0004519);; Molecular Function: binding (GO:0005488);; Cellular Component: cellular_compon…	K17710|1.8e-10|zma:100273524|K17710 pentatricopeptide repeat domain-containing protein 1 | (RefSeq) si486067f01; uncharacterized protein LOC100273524	--	[R]	General function prediction only	PPR repeat family	Pentatricopeptide repeat-containing protein At5g10690 OS=Arabidopsis thaliana OX=3702 GN=CBSPPR1 PE=2 SV=1	S	Function unknown	PREDICTED: pentatricopeptide repeat-containing protein At5g10690 [Solanum tuberosum]
gene.Soltu.DM.12G009410.1	894	1056	858	4161	3626	3855	1718	2209	1712	25.7009	26.9504	22.9605	106.492	105.195	100.937	45.7926	58.455	51.1437	2.32735e-07	1.53832	up	[IQR]	Lipid transport and metabolism;; Secondary metabolites biosynthesis, transport and catabolism;; General function prediction only	Molecular Function: oxidoreductase activity (GO:0016491);;	K00059|1.7e-29|sita:101776165|K00059 3-oxoacyl-[acyl-carrier protein] reductase [EC:1.1.1.100] | (RefSeq) 3-oxoacyl-[acyl-carrier-protein] reductase 4	Fatty acid biosynthesis (ko00061);; Biotin metabolism (ko00780);; Fatty acid metabolism (ko01212)	[R]	General function prediction only	short chain dehydrogenase	3-oxoacyl-[acyl-carrier-protein] reductase, chloroplastic OS=Cuphea lanceolata OX=3930 GN=CLKR27 PE=2 SV=1	S	Function unknown	uncharacterized protein LOC107007615 [Solanum pennellii]
gene.Soltu.DM.10G017860.1	31	53	30	271	237	323	74	120	66	0.737887	1.11078	0.655582	5.78777	5.73653	7.05603	1.64752	2.65038	1.64583	0.00030734	2.17274	up	--	--	Molecular Function: DNA binding (GO:0003677);; Cellular Component: nucleus (GO:0005634);; Biological Process: regulation of transcription, DNA-templated (GO:0006355);; Biological Process: leaf morphogenesis (GO:0009965);; Biological Process: response to chitin (GO:0010200);; Biological Process: negative regulation of cell size (GO:0045792);; Biological Process: inflorescence morphogenesis (GO:004…	K00521|2.1e-46|cmos:111447866|K00521 ferric-chelate reductase [EC:1.16.1.7] | (RefSeq) ferric reduction oxidase 7, chloroplastic-like	--	--	--	No apical meristem (NAM) protein	NAC domain-containing protein 6 OS=Glycine max OX=3847 GN=NAC6 PE=2 SV=1	S	Function unknown	PREDICTED: NAC transcription factor 29 [Solanum tuberosum]
gene.Soltu.DM.10G019450.1	28	121	176	334	234	340	1120	1228	1125	0.375514	1.43981	2.2052	4.00662	3.18275	4.16982	13.9965	15.2251	15.7501	0.00359526	2.74767	up	[GHR]	Carbohydrate transport and metabolism;; Coenzyme transport and metabolism;; General function prediction only	Molecular Function: magnesium ion binding (GO:0000287);; Molecular Function: carboxy-lyase activity (GO:0016831);; Molecular Function: thiamine pyrophosphate binding (GO:0030976);;	K01568|0.0e+00|sot:102594418|K01568 pyruvate decarboxylase [EC:4.1.1.1] | (RefSeq) StPDC; pyruvate decarboxylase 1	Glycolysis / Gluconeogenesis (ko00010)	[EH]	Amino acid transport and metabolism;; Coenzyme transport and metabolism	Thiamine pyrophosphate enzyme, N-terminal TPP binding domain	Pyruvate decarboxylase 1 OS=Arabidopsis thaliana OX=3702 GN=PDC1 PE=2 SV=1	GH	Carbohydrate transport and metabolism;; Coenzyme transport and metabolism	PREDICTED: pyruvate decarboxylase 1 [Solanum tuberosum]
gene.Soltu.DM.08G019310.1	257	503	300	820	695	811	1323	1345	1275	4.01165	6.97339	4.35372	11.3969	10.9368	11.5228	19.1428	19.3269	20.6745	4.73625e-06	1.54091	up	--	--	Molecular Function: catechol oxidase activity (GO:0004097);; Biological Process: pigment biosynthetic process (GO:0046148);; Molecular Function: metal ion binding (GO:0046872);;	K00422|0.0e+00|sot:102604380|K00422 polyphenol oxidase [EC:1.10.3.1] | (RefSeq) polyphenol oxidase D, chloroplastic	Tyrosine metabolism (ko00350);; Isoquinoline alkaloid biosynthesis (ko00950)	--	--	Protein of unknown function (DUF_B2219)	Polyphenol oxidase D, chloroplastic OS=Solanum lycopersicum OX=4081 PE=3 SV=2	--	--	PREDICTED: polyphenol oxidase D, chloroplastic isoform X1 [Solanum tuberosum]
gene.Soltu.DM.07G017540.1	340	315	319	1990	1700	1892	3047	3403	2943	5.76988	4.73856	5.03931	30.0609	29.1111	29.2373	47.9529	53.1766	51.9117	4.31135e-26	2.89035	up	--	--	Molecular Function: magnesium ion binding (GO:0000287);; Molecular Function: terpene synthase activity (GO:0010333);;	K15803|0.0e+00|sot:102598796|K15803 (-)-germacrene D synthase [EC:4.2.3.75] | (RefSeq) (-)-germacrene D synthase-like	Sesquiterpenoid and triterpenoid biosynthesis (ko00909)	--	--	Terpene synthase family, metal binding domain	(-)-germacrene D synthase OS=Vitis vinifera OX=29760 GN=VIT_19s0014g04930 PE=1 SV=1	S	Function unknown	PREDICTED: (-)-germacrene D synthase-like [Solanum tuberosum]
gene.Soltu.DM.04G022940.1	30	33	30	70	71	85	56	80	57	0.883124	0.878063	0.828764	1.86386	2.15069	2.31893	1.54574	2.20746	1.77846	8.03012e-05	1.1041	up	--	--	Cellular Component: integral component of membrane (GO:0016021);;	--	--	--	--	--	--	S	Function unknown	PREDICTED: uncharacterized protein LOC102589571 isoform X1 [Solanum tuberosum]
gene.Soltu.DM.11G001100.1	229	182	192	707	674	755	449	518	350	3.20608	2.2631	2.50557	8.83252	9.53922	9.64881	5.84578	6.68568	5.10252	8.7089e-09	1.42714	up	[M]	Cell wall/membrane/envelope biogenesis	Molecular Function: protein kinase activity (GO:0004672);; Molecular Function: ATP binding (GO:0005524);; Cellular Component: integral component of membrane (GO:0016021);;	K01180|3.2e-63|cmax:111487562|K01180 endo-1,3(4)-beta-glucanase [EC:3.2.1.6] | (RefSeq) uncharacterized protein LOC111487562	--	--	--	Protein tyrosine and serine/threonine kinase	Cysteine-rich receptor-like protein kinase 3 OS=Arabidopsis thaliana OX=3702 GN=CRK3 PE=2 SV=1	T	Signal transduction mechanisms	PREDICTED: putative receptor-like protein kinase At4g00960 [Solanum tuberosum]
gene.Soltu.DM.06G004520.1	0	0	0	71	45	52	4	21	5	0	0	0	2.32885	1.66922	1.73164	0.103333	0.688869	0.170354	3.02632e-05	7.36395	up	--	--	Molecular Function: DNA binding (GO:0003677);;	--	--	--	--	Protein of unknown function (DUF3755)	--	--	--	PREDICTED: uncharacterized protein LOC102579632 isoform X2 [Solanum tuberosum]
gene.Soltu.DM.07G019580.1	80	85	77	330	255	299	1183	1259	1081	1.67069	1.57027	1.49031	6.14354	5.3859	5.6977	22.9615	24.2545	23.5082	3.71335e-07	3.16032	up	[E]	Amino acid transport and metabolism	Biological Process: cellular amino acid metabolic process (GO:0006520);; Molecular Function: carboxy-lyase activity (GO:0016831);; Molecular Function: pyridoxal phosphate binding (GO:0030170);;	K01593|2.3e-287|sot:102600956|K01593 aromatic-L-amino-acid/L-tryptophan decarboxylase [EC:4.1.1.28 4.1.1.105] | (RefSeq) aromatic-L-amino-acid decarboxylase-like	Tyrosine metabolism (ko00350);; Phenylalanine metabolism (ko00360);; Tryptophan metabolism (ko00380);; Isoquinoline alkaloid biosynthesis (ko00950);; Betalain biosynthesis (ko00965)	[E]	Amino acid transport and metabolism	Pyridoxal-dependent decarboxylase conserved domain	Tryptophan decarboxylase TDC1 OS=Camptotheca acuminata OX=16922 GN=TDC1 PE=1 SV=1	E	Amino acid transport and metabolism	PREDICTED: aromatic-L-amino-acid decarboxylase-like [Solanum tuberosum]
gene.Soltu.DM.12G029590.1	341	362	353	1482	1301	1179	1462	1592	1259	7.24147	6.8262	6.98661	28.0669	27.9347	22.8363	28.8456	31.1848	27.8425	8.4094e-52	1.90792	up	[HC]	Coenzyme transport and metabolism;; Energy production and conversion	Molecular Function: FAD binding (GO:0071949);;	K09838|2.0e-15|dct:110097029|K09838 zeaxanthin epoxidase [EC:1.14.15.21] | (RefSeq) zeaxanthin epoxidase, chloroplastic	Carotenoid biosynthesis (ko00906)	[CR]	Energy production and conversion;; General function prediction only	FAD binding domain	Monooxygenase 2 OS=Arabidopsis thaliana OX=3702 GN=MO2 PE=2 SV=1	CH	Energy production and conversion;; Coenzyme transport and metabolism	PREDICTED: FAD-dependent urate hydroxylase-like isoform X3 [Solanum tuberosum]
gene.Soltu.DM.07G014190.1	5676	5714	5864	2545	2254	2399	2598	2753	2665	91.977	82.2063	88.4602	36.6917	36.8361	35.3895	39.0243	41.0526	44.8592	2.12435e-26	-1.24168	down	[QV]	Secondary metabolites biosynthesis, transport and catabolism;; Defense mechanisms	Molecular Function: monooxygenase activity (GO:0004497);; Molecular Function: iron ion binding (GO:0005506);; Molecular Function: oxidoreductase activity, acting on paired donors, with incorporation or reduction of molecular oxygen (GO:0016705);; Molecular Function: heme binding (GO:0020037);;	K24179|6.6e-136|adu:107457921|K24179 cytochrome P450 family 72 subfamily A polypeptide 61 [EC:1.14.14.-] | (RefSeq) cytochrome P450 72A15	--	[QI]	Secondary metabolites biosynthesis, transport and catabolism;; Lipid transport and metabolism	Cytochrome P450	Cytochrome P450 CYP72A219 OS=Panax ginseng OX=4054 PE=2 SV=1	Q	Secondary metabolites biosynthesis, transport and catabolism	PREDICTED: cytochrome P450 CYP72A219-like [Solanum tuberosum]
gene.Soltu.DM.05G012130.1	135	149	198	503	404	464	1047	1167	1122	5.05785	4.95534	6.94116	16.8691	15.3279	15.8906	36.5721	40.462	43.9217	1.06889e-06	2.25185	up	--	--	Molecular Function: transcription factor activity, sequence-specific DNA binding (GO:0003700);; Cellular Component: nucleus (GO:0005634);; Molecular Function: sequence-specific DNA binding (GO:0043565);;	K18835|2.4e-26|ats:109786129|K18835 WRKY transcription factor 2 | (RefSeq) LOC109786129; probable WRKY transcription factor 2	Plant-pathogen interaction (ko04626)	--	--	WRKY DNA -binding domain	Probable WRKY transcription factor 75 OS=Arabidopsis thaliana OX=3702 GN=WRKY75 PE=1 SV=1	K	Transcription	probable WRKY transcription factor 75-like [Solanum tuberosum]
gene.Soltu.DM.08G023210.1	184	194	217	416	391	435	777	637	493	5.34043	5.00114	5.86704	10.735	11.4503	11.4839	20.8999	17.0118	14.851	5.03541e-06	1.34796	up	--	--	Cellular Component: extracellular region (GO:0005576);;	K20628|6.8e-25|sita:101779243|K20628 expansin | (RefSeq) expansin-B16 isoform X1	--	--	--	Lytic transglycolase	Expansin-like B1 OS=Oryza sativa subsp. japonica OX=39947 GN=EXLB1 PE=2 SV=2	G	Carbohydrate transport and metabolism	PREDICTED: expansin-like B1 [Solanum tuberosum]
gene.Soltu.DM.12G022690.1	140	188	112	529	434	485	231	406	377	1.32726	1.5867	0.987851	4.48131	4.17185	4.19961	2.03916	3.55539	3.72779	1.6289e-07	1.42174	up	--		Molecular Function: protein kinase activity (GO:0004672);; Molecular Function: ATP binding (GO:0005524);; Cellular Component: integral component of membrane (GO:0016021);;	K13416|2.0e-67|lsv:111899016|K13416 brassinosteroid insensitive 1-associated receptor kinase 1 [EC:2.7.10.1 2.7.11.1] | (RefSeq) BRASSINOSTEROID INSENSITIVE 1-associated receptor kinase 1-like isoform X1	MAPK signaling pathway - plant (ko04016);; Plant hormone signal transduction (ko04075);; Plant-pathogen interaction (ko04626)	--	--	Protein tyrosine and serine/threonine kinase	Probable LRR receptor-like serine/threonine-protein kinase At1g53430 OS=Arabidopsis thaliana OX=3702 GN=At1g53430 PE=1 SV=1	T	Signal transduction mechanisms	putative LRR receptor-like serine/threonine-protein kinase [Capsicum baccatum]
gene.Soltu.DM.02G018870.1	20	51	31	93	101	119	86	66	87	0.321273	0.747458	0.467208	1.37279	1.69534	1.80402	1.31722	0.998474	1.50239	9.12901e-05	1.39324	up	--	--	Molecular Function: nucleoside transmembrane transporter activity (GO:0005337);; Cellular Component: integral component of membrane (GO:0016021);;	K15014|2.8e-237|sot:102601592|K15014 solute carrier family 29 (equilibrative nucleoside transporter), member 1/2/3 | (RefSeq) equilibrative nucleotide transporter 3-like	--	[F]	Nucleotide transport and metabolism	Nucleoside transporter	Equilibrative nucleotide transporter 3 OS=Arabidopsis thaliana OX=3702 GN=ENT3 PE=1 SV=1	S	Function unknown	PREDICTED: equilibrative nucleotide transporter 3-like [Solanum tuberosum]
gene.Soltu.DM.10G004230.1	83	71	89	38	24	28	40	24	22	3.03279	2.30788	3.04315	1.22917	0.867919	0.910967	1.33435	0.812633	0.819793	1.5343e-06	-1.54238	down	--	--	Molecular Function: metal ion binding (GO:0046872);;	K10666|5.9e-114|sot:102600465|K10666 E3 ubiquitin-protein ligase RNF5 [EC:2.3.2.27] | (RefSeq) E3 ubiquitin-protein ligase RMA1H1-like	Protein processing in endoplasmic reticulum (ko04141)	[O]	Posttranslational modification, protein turnover, chaperones	RING-type zinc-finger	E3 ubiquitin-protein ligase RMA1H1 OS=Capsicum annuum OX=4072 GN=RMA1H1 PE=1 SV=1	O	Posttranslational modification, protein turnover, chaperones	PREDICTED: E3 ubiquitin-protein ligase RMA1H1-like [Solanum tuberosum]
Solanum_tuberosum_newGene_4454	0	0	0	61	89	106	12	38	34	0	0	0	0.885869	2.1838	2.07719	0.215062	0.785082	0.628116	6.58592e-08	8.18105	up	--	--	--	--	--	--	--	--	--	--	--	PREDICTED: uncharacterized protein LOC109205542, partial [Nicotiana attenuata]
gene.Soltu.DM.01G019850.1	2468	2621	2604	10790	9279	10313	11532	12999	11881	54.8647	51.7427	53.8995	213.479	208.133	208.736	237.668	265.961	274.449	4.2109e-52	2.06091	up	--	--	Molecular Function: hydrolase activity, hydrolyzing O-glycosyl compounds (GO:0004553);; Biological Process: carbohydrate metabolic process (GO:0005975);;	K19891|7.5e-54|csat:104710092|K19891 glucan endo-1,3-beta-glucosidase 1/2/3 [EC:3.2.1.39] | (RefSeq) glucan endo-1,3-beta-glucosidase 3 isoform X2	Starch and sucrose metabolism (ko00500)	--	--	Glycosyl hydrolases family 17	Glucan endo-1,3-beta-glucosidase, basic isoform 2 OS=Solanum tuberosum OX=4113 GN=GLUB2 PE=2 SV=1	G	Carbohydrate transport and metabolism	beta-1,3-glucanase 22 [Solanum tuberosum]
gene.Soltu.DM.04G006870.2	0	0	0	0	1134	0	45	557	0	0	0	0	0	9.28349	0	0.336872	4.15762	0	8.65373e-10	23.1276	up	--	--	Cellular Component: nucleus (GO:0005634);;	K11446|4.0e-96|nnu:104596082|K11446 [histone H3]-trimethyl-L-lysine4 demethylase [EC:1.14.11.67] | (RefSeq) lysine-specific demethylase 5B	--	[R]	General function prediction only	JmjC domain, hydroxylase	Putative lysine-specific demethylase JMJ16 OS=Arabidopsis thaliana OX=3702 GN=JMJ16 PE=2 SV=1	S	Function unknown	PREDICTED: putative lysine-specific demethylase JMJ16 [Solanum tuberosum]
gene.Soltu.DM.05G021350.1	8	18	5	92	38	52	24	52	20	0.112385	0.234673	0.058827	1.24486	0.577205	0.717851	0.325557	0.724307	0.305926	0.00317626	2.08663	up	[T]	Signal transduction mechanisms	Molecular Function: ATP binding (GO:0005524);; Cellular Component: integral component of membrane (GO:0016021);; Molecular Function: ATPase activity (GO:0016887);;	K05681|1.2e-67|gmx:100818395|K05681 ATP-binding cassette, subfamily G (WHITE), member 2 | (RefSeq) ABC transporter G family member 5	ABC transporters (ko02010)	[Q]	Secondary metabolites biosynthesis, transport and catabolism	ABC-2 type transporter	ABC transporter G family member 11 OS=Arabidopsis thaliana OX=3702 GN=ABCG11 PE=1 SV=1	V	Defense mechanisms	PREDICTED: ABC transporter G family member 11-like [Solanum tuberosum]
gene.Soltu.DM.07G017580.1	138	106	157	708	667	742	1116	1388	1152	3.17561	2.16308	3.37146	14.5583	15.5454	15.6087	23.8992	29.5123	27.6548	5.09709e-18	2.7899	up	--	--	Molecular Function: magnesium ion binding (GO:0000287);; Molecular Function: terpene synthase activity (GO:0010333);;	K15803|1.9e-240|sot:102598796|K15803 (-)-germacrene D synthase [EC:4.2.3.75] | (RefSeq) (-)-germacrene D synthase-like	Sesquiterpenoid and triterpenoid biosynthesis (ko00909)	--	--	Terpene synthase family, metal binding domain	(-)-germacrene D synthase OS=Vitis vinifera OX=29760 GN=VIT_19s0014g04930 PE=1 SV=1	S	Function unknown	PREDICTED: (-)-germacrene D synthase-like [Solanum tuberosum]
gene.Soltu.DM.10G024730.1	183	162	210	692	503	572	1527	1870	1653	3.6242	2.83478	3.86059	12.1846	10.0418	10.2981	28.0295	34.0806	34.0115	3.48284e-07	2.57867	up	[QV]	Secondary metabolites biosynthesis, transport and catabolism;; Defense mechanisms	Molecular Function: monooxygenase activity (GO:0004497);; Molecular Function: iron ion binding (GO:0005506);; Cellular Component: integral component of membrane (GO:0016021);; Molecular Function: oxidoreductase activity, acting on paired donors, with incorporation or reduction of molecular oxygen (GO:0016705);; Molecular Function: heme binding (GO:0020037);;	K22983|6.7e-249|sot:102594703|K22983 cytochrome P450 family 76 subfamily A | (RefSeq) cytochrome P450 76A2	--	[Q]	Secondary metabolites biosynthesis, transport and catabolism	Cytochrome P450	Cytochrome P450 76A2 OS=Solanum melongena OX=4111 GN=CYP76A2 PE=2 SV=1	Q	Secondary metabolites biosynthesis, transport and catabolism	PREDICTED: cytochrome P450 76A2-like [Solanum tuberosum]
gene.Soltu.DM.10G015470.1	190	128	183	275	325	300	736	802	837	3.25541	1.9534	2.92338	4.20554	5.62385	4.69825	11.7227	12.6851	14.9449	0.00258568	1.66684	up	[QV]	Secondary metabolites biosynthesis, transport and catabolism;; Defense mechanisms	Molecular Function: monooxygenase activity (GO:0004497);; Molecular Function: iron ion binding (GO:0005506);; Cellular Component: integral component of membrane (GO:0016021);; Molecular Function: oxidoreductase activity, acting on paired donors, with incorporation or reduction of molecular oxygen (GO:0016705);; Molecular Function: heme binding (GO:0020037);;	K24179|2.4e-154|lja:Lj3g3v3776580.1|K24179 cytochrome P450 family 72 subfamily A polypeptide 61 [EC:1.14.14.-] | (RefSeq) Lj3g3v3776580.1; -	--	[QI]	Secondary metabolites biosynthesis, transport and catabolism;; Lipid transport and metabolism	Cytochrome P450	Cytochrome P450 CYP72A219 OS=Panax ginseng OX=4054 PE=2 SV=1	Q	Secondary metabolites biosynthesis, transport and catabolism	PREDICTED: cytochrome P450 CYP72A219-like [Solanum tuberosum]
gene.Soltu.DM.01G039330.1	768	1385	1367	521	365	380	461	450	471	18.8147	30.1424	31.1894	11.345	9.02157	8.47123	10.4637	10.1377	11.9931	5.90976e-12	-1.45692	down	[G]	Carbohydrate transport and metabolism	Molecular Function: hydrolase activity, hydrolyzing O-glycosyl compounds (GO:0004553);; Cellular Component: cell wall (GO:0005618);; Biological Process: xyloglucan metabolic process (GO:0010411);; Cellular Component: integral component of membrane (GO:0016021);; Molecular Function: xyloglucan:xyloglucosyl transferase activity (GO:0016762);; Biological Process: cell wall biogenesis (GO:0042546);; …	K08235|3.3e-180|sot:102603929|K08235 xyloglucan:xyloglucosyl transferase [EC:2.4.1.207] | (RefSeq) probable xyloglucan endotransglucosylase/hydrolase 1	--	--	--	Glycosyl hydrolases family 16	Probable xyloglucan endotransglucosylase/hydrolase 1 OS=Solanum lycopersicum OX=4081 GN=XTH1 PE=2 SV=1	--	--	PREDICTED: probable xyloglucan endotransglucosylase/hydrolase 1 [Solanum tuberosum]
gene.Soltu.DM.03G018700.1	69	78	89	295	189	200	189	171	190	1.95988	1.96491	2.34406	7.44737	5.40155	5.16017	4.97499	4.47682	5.61514	2.57679e-09	1.31672	up	--	--	--	--	--	--	--	GRAM domain	GEM-like protein 4 OS=Arabidopsis thaliana OX=3702 GN=At5g08350 PE=2 SV=1	S	Function unknown	PREDICTED: putative GEM-like protein 8 [Solanum tuberosum]
gene.Soltu.DM.08G018140.1	105	103	63	520	463	502	158	199	177	2.08358	1.82864	1.15653	9.24701	9.33641	9.12564	2.9296	3.65364	3.66534	0.000305427	1.80401	up	--	--	Molecular Function: aspartic-type endopeptidase activity (GO:0004190);;	K22683|9.8e-40|cam:101511311|K22683 aspartyl protease family protein [EC:3.4.23.-] | (RefSeq) protein ASPARTIC PROTEASE IN GUARD CELL 1	--	[O]	Posttranslational modification, protein turnover, chaperones	Eukaryotic aspartyl protease	Aspartyl protease family protein At5g10770 OS=Arabidopsis thaliana OX=3702 GN=At5g10770 PE=2 SV=1	O	Posttranslational modification, protein turnover, chaperones	PREDICTED: protein ASPARTIC PROTEASE IN GUARD CELL 1-like [Solanum tuberosum]
gene.Soltu.DM.01G005080.1	12	47	14	56	63	68	69	68	73	0.209887	0.74871	0.227976	0.891438	1.13373	1.10829	1.13675	1.11933	1.35642	0.00565251	1.42934	up	[M]	Cell wall/membrane/envelope biogenesis	Molecular Function: protein kinase activity (GO:0004672);; Molecular Function: ATP binding (GO:0005524);; Cellular Component: integral component of membrane (GO:0016021);; Molecular Function: polysaccharide binding (GO:0030247);;	K13416|5.5e-46|bna:106410693|K13416 brassinosteroid insensitive 1-associated receptor kinase 1 [EC:2.7.10.1 2.7.11.1] | (RefSeq) somatic embryogenesis receptor kinase 4-like isoform X1	MAPK signaling pathway - plant (ko04016);; Plant hormone signal transduction (ko04075);; Plant-pathogen interaction (ko04626)	[T]	Signal transduction mechanisms	Protein kinase domain	Rust resistance kinase Lr10 OS=Triticum aestivum OX=4565 GN=LRK10 PE=2 SV=1	T	Signal transduction mechanisms	rust resistance kinase Lr10-like isoform X1 [Solanum lycopersicum]
gene.Soltu.DM.01G032910.1	4	5	17	46	43	43	28	32	26	0.065479	0.09499	0.34073	0.883401	0.932324	0.846973	0.558232	0.63796	0.576419	0.000854314	1.98834	up	--	--	Molecular Function: nutrient reservoir activity (GO:0045735);;	--	--	--	--	Cupin	Cocosin 1 OS=Cocos nucifera OX=13894 GN=COS-1 PE=1 SV=1	S	Function unknown	PREDICTED: 13S globulin seed storage protein 2-like [Solanum tuberosum]
gene.Soltu.DM.02G022410.1	108	100	139	518	431	537	1996	2315	1874	2.12795	1.74227	2.55007	9.09878	8.58018	9.64441	36.5307	42.0606	38.4228	8.22043e-06	3.43294	up	--	--	Cellular Component: integral component of membrane (GO:0016021);; Biological Process: transmembrane transport (GO:0055085);;	K24139|5.4e-218|sly:101263965|K24139 auxin efflux carrier family protein | (RefSeq) protein PIN-LIKES 7-like	--	[S]	Function unknown	Membrane transport protein	Protein PIN-LIKES 5 OS=Arabidopsis thaliana OX=3702 GN=PILS5 PE=2 SV=1	S	Function unknown	protein PIN-LIKES 7-like [Solanum lycopersicum]
gene.Soltu.DM.11G008770.1	170	139	150	757	553	628	846	938	854	6.93028	5.02011	5.68922	27.455	22.7163	23.2991	31.9667	35.168	36.1358	3.77674e-22	2.255	up	--	--	--	K14948|1.2e-25|jre:109009978|K14948 polypyrimidine tract-binding protein 2 | (RefSeq) polypyrimidine tract-binding protein homolog 3-like isoform X1	--	--	--	Alginate lyase	Citrate-binding protein OS=Hevea brasiliensis OX=3981 GN=CBP PE=1 SV=1	S	Function unknown	PREDICTED: citrate-binding protein-like [Solanum tuberosum]
gene.Soltu.DM.11G005450.1	21	10	20	66	34	59	115	130	91	0.699306	0.277246	0.612913	1.97337	1.14443	1.78676	3.58458	4.03587	3.19581	0.000237905	2.20596	up	--	--	Molecular Function: UDP-glycosyltransferase activity (GO:0008194);;	K13080|2.1e-56|vvi:100244875|K13080 flavanone 7-O-glucoside 2''-O-beta-L-rhamnosyltransferase [EC:2.4.1.236] | (RefSeq) flavanone 7-O-glucoside 2''-O-beta-L-rhamnosyltransferase	Flavonoid biosynthesis (ko00941);; Flavone and flavonol biosynthesis (ko00944)	[GC]	Carbohydrate transport and metabolism;; Energy production and conversion	--	UDP-glucosyltransferase 29 OS=Panax ginseng OX=4054 GN=UGT29 PE=1 SV=1	S	Function unknown	PREDICTED: beta-D-glucosyl crocetin beta-1,6-glucosyltransferase-like [Solanum tuberosum]
gene.Soltu.DM.03G025670.1	24	46	56	114	69	97	165	211	120	0.715274	1.24151	1.56971	3.07563	2.09526	2.66881	4.64067	5.90159	3.78167	0.00141489	1.57268	up	--	--	Cellular Component: plasma membrane (GO:0005886);; Biological Process: response to nitrate (GO:0010167);; Biological Process: nitrate transport (GO:0015706);; Cellular Component: integral component of membrane (GO:0016021);; Biological Process: nitrate assimilation (GO:0042128);;	--	--	--	--	High-affinity nitrate transporter accessory	High-affinity nitrate transporter 3.1 OS=Arabidopsis thaliana OX=3702 GN=NRT3.1 PE=1 SV=1	P	Inorganic ion transport and metabolism	PREDICTED: high-affinity nitrate transporter 3.1 [Solanum tuberosum]
gene.Soltu.DM.04G020660.1	30	20	24	79	73	66	100	128	95	0.523578	0.305474	0.384275	1.23019	1.27575	1.0476	1.61504	2.06546	1.71371	2.96998e-06	1.8055	up	[QV]	Secondary metabolites biosynthesis, transport and catabolism;; Defense mechanisms	Molecular Function: monooxygenase activity (GO:0004497);; Molecular Function: iron ion binding (GO:0005506);; Molecular Function: oxidoreductase activity, acting on paired donors, with incorporation or reduction of molecular oxygen (GO:0016705);; Molecular Function: heme binding (GO:0020037);;	K15805|1.6e-248|nto:104116297|K15805 5-epiaristolochene 1,3-dihydroxylase [EC:1.14.14.149] | (RefSeq) 5-epiaristolochene 1,3-dihydroxylase	Sesquiterpenoid and triterpenoid biosynthesis (ko00909)	[Q]	Secondary metabolites biosynthesis, transport and catabolism	Cytochrome P450	Cytochrome P450 71D7 OS=Solanum chacoense OX=4108 GN=CYP71D7 PE=3 SV=1	Q	Secondary metabolites biosynthesis, transport and catabolism	PREDICTED: cytochrome P450 71D7 [Solanum tuberosum]
gene.Soltu.DM.01G033970.1	2844	2997	2744	7608	6807	7449	5169	5240	4413	35.6059	33.3071	31.9783	84.7536	85.9801	84.9022	59.9903	60.3684	57.4006	1.01219e-11	1.01834	up	[T]	Signal transduction mechanisms	Cellular Component: integral component of membrane (GO:0016021);; Molecular Function: oxidoreductase activity (GO:0016491);;	K00521|0.0e+00|sot:102579252|K00521 ferric-chelate reductase [EC:1.16.1.7] | (RefSeq) ferric reduction oxidase 2-like	--	[PQ]	Inorganic ion transport and metabolism;; Secondary metabolites biosynthesis, transport and catabolism	Ferric reductase NAD binding domain	Ferric reduction oxidase 2 OS=Arabidopsis thaliana OX=3702 GN=FRO2 PE=1 SV=2	U	Intracellular trafficking, secretion, and vesicular transport	PREDICTED: ferric reduction oxidase 2-like [Solanum tuberosum]
gene.Soltu.DM.07G015810.1	0	0	0	10	57	0	42	130	0	0	0	0	0.085117	0.59009	0	0.401738	1.24199	0	0.00448191	7.69047	up	--	--	--	--	--	--	--	PPR repeat family	--	S	Function unknown	PREDICTED: pentatricopeptide repeat-containing protein At5g65560-like [Solanum tuberosum]
gene.Soltu.DM.02G003650.1	105	90	116	445	454	479	649	867	636	2.6295	1.99396	2.71623	9.97021	11.5492	10.9869	15.1683	20.0992	16.6611	5.43204e-17	2.44577	up	[P]	Inorganic ion transport and metabolism	Molecular Function: zinc ion transmembrane transporter activity (GO:0005385);; Cellular Component: integral component of membrane (GO:0016021);;	K14709|1.5e-179|sot:102578180|K14709 solute carrier family 39 (zinc transporter), member 1/2/3 | (RefSeq) zinc transporter 8-like	--	[P]	Inorganic ion transport and metabolism	ZIP Zinc transporter	Zinc transporter 5 OS=Oryza sativa subsp. japonica OX=39947 GN=ZIP5 PE=2 SV=1	P	Inorganic ion transport and metabolism	PREDICTED: zinc transporter 8-like [Solanum tuberosum]
gene.Soltu.DM.04G024250.1	48	64	34	108	128	143	103	89	82	0.438115	0.516915	0.286582	0.877274	1.18796	1.19556	0.876628	0.751519	0.780697	0.000333586	1.10051	up	[T]	Signal transduction mechanisms	Molecular Function: protein kinase activity (GO:0004672);; Molecular Function: ATP binding (GO:0005524);; Cellular Component: integral component of membrane (GO:0016021);;	K13415|2.1e-80|han:110929858|K13415 protein brassinosteroid insensitive 1 [EC:2.7.10.1 2.7.11.1] | (RefSeq) systemin receptor SR160-like	Plant hormone signal transduction (ko04075)	--	--	Protein kinase domain	MDIS1-interacting receptor like kinase 2 OS=Arabidopsis thaliana OX=3702 GN=MIK2 PE=1 SV=3	S	Function unknown	PREDICTED: probable LRR receptor-like serine/threonine-protein kinase At4g08850 [Solanum tuberosum]
gene.Soltu.DM.06G018020.1	127	200	126	75	74	62	81	65	29	3.92092	5.5028	3.61397	2.04142	2.28472	1.74051	2.31847	1.83387	0.915321	0.000153765	-1.29252	down	[G]	Carbohydrate transport and metabolism	Molecular Function: channel activity (GO:0015267);; Cellular Component: integral component of membrane (GO:0016021);;	K09873|1.2e-130|sly:543951|K09873 aquaporin TIP | (RefSeq) TIP; TIP protein	--	[G]	Carbohydrate transport and metabolism	Major intrinsic protein	Probable aquaporin TIP-type RB7-5A OS=Nicotiana tabacum OX=4097 PE=2 SV=1	G	Carbohydrate transport and metabolism	membrane channel protein, partial [Solanum tuberosum]
gene.Soltu.DM.03G019820.1	88	133	55	190	223	228	220	169	171	1.83146	2.46516	1.066	3.53738	4.69781	4.34502	4.25967	3.24857	3.70815	0.000292332	1.07417	up	[H]	Coenzyme transport and metabolism	Molecular Function: O-methyltransferase activity (GO:0008171);; Biological Process: methylation (GO:0032259);; Molecular Function: protein dimerization activity (GO:0046983);;	K16040|2.4e-161|cann:107866062|K16040 trans-resveratrol di-O-methyltransferase [EC:2.1.1.240] | (RefSeq) trans-resveratrol di-O-methyltransferase-like	Stilbenoid, diarylheptanoid and gingerol biosynthesis (ko00945)	[R]	General function prediction only	O-methyltransferase domain	Trans-resveratrol di-O-methyltransferase OS=Vitis vinifera OX=29760 GN=ROMT PE=1 SV=2	S	Function unknown	PREDICTED: trans-resveratrol di-O-methyltransferase-like [Solanum tuberosum]
gene.Soltu.DM.04G011070.1	156	138	146	319	229	323	341	373	361	2.08957	1.64209	1.81509	3.80311	3.09729	3.94047	4.23491	4.59308	5.02165	2.00724e-06	1.08151	up	--	--	Cellular Component: integral component of membrane (GO:0016021);; Molecular Function: transferase activity, transferring glycosyl groups (GO:0016757);;	K18134|6.8e-80|gab:108463406|K18134 EGF domain-specific O-GlcNAc transferase [EC:2.4.1.255] | (RefSeq) uncharacterized protein LOC108463406	Other types of O-glycan biosynthesis (ko00514)	[S]	Function unknown	Protein of unknown function (DUF563)	Xylan glycosyltransferase MUCI21 OS=Arabidopsis thaliana OX=3702 GN=MUCI21 PE=1 SV=1	S	Function unknown	PREDICTED: EGF domain-specific O-linked N-acetylglucosamine transferase [Solanum tuberosum]
gene.Soltu.DM.12G009400.1	16	16	12	61	60	50	37	41	22	0.615336	0.570915	0.444813	2.20906	2.43304	1.85007	1.36963	1.51596	0.930572	0.00122208	1.54261	up	[IQR]	Lipid transport and metabolism;; Secondary metabolites biosynthesis, transport and catabolism;; General function prediction only	Molecular Function: oxidoreductase activity (GO:0016491);;	K00059|1.4e-25|gsl:Gasu_60850|K00059 3-oxoacyl-[acyl-carrier protein] reductase [EC:1.1.1.100] | (RefSeq) 3-oxoacyl-[acyl-carrier-protein] reductase	Fatty acid biosynthesis (ko00061);; Biotin metabolism (ko00780);; Fatty acid metabolism (ko01212)	[R]	General function prediction only	short chain dehydrogenase	3-oxoacyl-[acyl-carrier-protein] reductase, chloroplastic OS=Cuphea lanceolata OX=3930 GN=CLKR27 PE=2 SV=1	S	Function unknown	PREDICTED: 3-oxoacyl-[acyl-carrier-protein] reductase FabG-like [Solanum tuberosum]
gene.Soltu.DM.06G016360.1	11	0	0	11	17	13	94	149	233	0.186328	0	0	0.166103	0.30173	0.204334	1.55549	2.45564	4.32369	0.00716924	4.49724	up	--	--	Molecular Function: magnesium ion binding (GO:0000287);; Molecular Function: terpene synthase activity (GO:0010333);;	K15802|2.1e-273|sly:543549|K15802 germacrene C synthase [EC:4.2.3.60] | (RefSeq) SSTLE1; germacrene C synthase	Sesquiterpenoid and triterpenoid biosynthesis (ko00909)	--	--	Terpene synthase family, metal binding domain	Germacrene C synthase OS=Solanum lycopersicum OX=4081 GN=SSTLE1 PE=1 SV=1	S	Function unknown	PREDICTED: (E,E)-germacrene B synthase-like [Solanum tuberosum]
gene.Soltu.DM.03G023600.1	69	42	26	118	85	83	478	507	494	2.96224	1.61485	1.0437	4.53011	3.69162	3.27838	19.1906	20.2147	22.2483	0.00165103	2.65297	up	--	--	Molecular Function: serine-type endopeptidase inhibitor activity (GO:0004867);;	--	--	--	--	Potato type II proteinase inhibitor family	Proteinase inhibitor type-2 CEVI57 OS=Solanum lycopersicum OX=4081 GN=CEVI57 PE=2 SV=1	--	--	proteinase inhibitor type-2 CEVI57 precursor [Solanum lycopersicum]
gene.Soltu.DM.09G028720.1	59	42	38	151	168	171	277	338	285	0.40436	0.257241	0.240393	0.925978	1.17033	1.07174	1.77392	2.14852	2.03936	2.99131e-08	2.26798	up	[T]	Signal transduction mechanisms	Molecular Function: ATP binding (GO:0005524);; Cellular Component: integral component of membrane (GO:0016021);; Molecular Function: ATPase activity (GO:0016887);;	K08712|1.9e-148|gsl:Gasu_29800|K08712 ATP-binding cassette, subfamily G (WHITE), member 2, SNQ2 | (RefSeq) ABC transporter, ATP-binding protein	ABC transporters (ko02010)	[Q]	Secondary metabolites biosynthesis, transport and catabolism	ABC-2 type transporter	Pleiotropic drug resistance protein 1 OS=Nicotiana plumbaginifolia OX=4092 GN=PDR1 PE=1 SV=1	V	Defense mechanisms	PREDICTED: pleiotropic drug resistance protein 1-like isoform X1 [Solanum tuberosum]
gene.Soltu.DM.07G019560.1	38	34	23	120	143	191	668	690	590	2.23016	1.79638	1.24328	6.3785	8.61951	10.352	36.9765	37.9162	36.6166	1.52527e-07	3.63248	up	[E]	Amino acid transport and metabolism	Biological Process: cellular amino acid metabolic process (GO:0006520);; Molecular Function: carboxy-lyase activity (GO:0016831);; Molecular Function: pyridoxal phosphate binding (GO:0030170);;	K01593|1.2e-97|sot:102600956|K01593 aromatic-L-amino-acid/L-tryptophan decarboxylase [EC:4.1.1.28 4.1.1.105] | (RefSeq) aromatic-L-amino-acid decarboxylase-like	Tyrosine metabolism (ko00350);; Phenylalanine metabolism (ko00360);; Tryptophan metabolism (ko00380);; Isoquinoline alkaloid biosynthesis (ko00950);; Betalain biosynthesis (ko00965)	[E]	Amino acid transport and metabolism	Pyridoxal-dependent decarboxylase conserved domain	Tryptophan decarboxylase TDC1 OS=Camptotheca acuminata OX=16922 GN=TDC1 PE=1 SV=1	E	Amino acid transport and metabolism	PREDICTED: aromatic-L-amino-acid decarboxylase-like [Solanum tuberosum]
gene.Soltu.DM.10G013070.1	34	19	22	93	89	100	53	59	36	0.596099	0.286671	0.364987	1.4827	1.59141	1.62673	0.872581	0.966477	0.665755	0.00323835	1.41793	up	--		Molecular Function: protein kinase activity (GO:0004672);; Molecular Function: ATP binding (GO:0005524);; Cellular Component: integral component of membrane (GO:0016021);; Molecular Function: carbohydrate binding (GO:0030246);;	K22133|1.2e-93|egr:104443802|K22133 oxalate---CoA ligase [EC:6.2.1.8] | (RefSeq) oxalate--CoA ligase	Glyoxylate and dicarboxylate metabolism (ko00630)	--	--	Protein kinase domain	L-type lectin-domain containing receptor kinase IX.1 OS=Arabidopsis thaliana OX=3702 GN=LECRK91 PE=1 SV=1	T	Signal transduction mechanisms	PREDICTED: L-type lectin-domain containing receptor kinase IX.1-like [Solanum tuberosum]
gene.Soltu.DM.01G019820.1	1333	1508	1295	5733	5022	4962	6220	7182	6917	30.9365	31.0722	27.9807	118.422	117.612	104.862	133.849	153.437	166.815	1.47423e-32	2.07377	up	--	--	Molecular Function: hydrolase activity, hydrolyzing O-glycosyl compounds (GO:0004553);; Biological Process: carbohydrate metabolic process (GO:0005975);;	K19891|2.2e-53|csat:104710092|K19891 glucan endo-1,3-beta-glucosidase 1/2/3 [EC:3.2.1.39] | (RefSeq) glucan endo-1,3-beta-glucosidase 3 isoform X2	Starch and sucrose metabolism (ko00500)	--	--	Glycosyl hydrolases family 17	Glucan endo-1,3-beta-glucosidase, basic isoform 2 OS=Solanum tuberosum OX=4113 GN=GLUB2 PE=2 SV=1	G	Carbohydrate transport and metabolism	PREDICTED: glucan endo-1,3-beta-glucosidase, basic isoform 1 [Solanum tuberosum]
gene.Soltu.DM.06G026920.1	84	78	144	251	2290	1182	225	357	271	1.26383	1.04558	2.01707	3.36485	34.9393	16.2741	3.14627	4.95813	4.24909	0.0082659	2.83495	up	[J]	Translation, ribosomal structure and biogenesis	Molecular Function: translation elongation factor activity (GO:0003746);; Molecular Function: GTPase activity (GO:0003924);; Molecular Function: GTP binding (GO:0005525);;	K02358|1.1e-265|sot:102584165|K02358 elongation factor Tu | (RefSeq) elongation factor TuB, chloroplastic	Plant-pathogen interaction (ko04626)	[J]	Translation, ribosomal structure and biogenesis	Elongation factor Tu GTP binding domain	Elongation factor TuB, chloroplastic OS=Nicotiana sylvestris OX=4096 GN=TUFB PE=2 SV=1	J	Translation, ribosomal structure and biogenesis	PREDICTED: elongation factor TuB, chloroplastic [Solanum tuberosum]
gene.Soltu.DM.07G014220.1	526	603	585	202	191	206	321	389	268	9.30819	9.47275	9.62752	3.16973	3.39599	3.31204	5.25521	6.32967	4.92432	0.000130051	-1.17205	down	[G]	Carbohydrate transport and metabolism	Molecular Function: UDP-glycosyltransferase activity (GO:0008194);;	K23260|1.4e-108|mesc:110614594|K23260 scopoletin glucosyltransferase [EC:2.4.1.128] | (RefSeq) scopoletin glucosyltransferase-like	Phenylpropanoid biosynthesis (ko00940)	[GC]	Carbohydrate transport and metabolism;; Energy production and conversion	UDP-glucoronosyl and UDP-glucosyl transferase	Scopoletin glucosyltransferase OS=Nicotiana tabacum OX=4097 GN=TOGT1 PE=1 SV=1	S	Function unknown	scopoletin glucosyltransferase-like [Solanum tuberosum]
gene.Soltu.DM.12G028530.1	36	31	24	70	58	64	48	101	58	1.19609	0.906555	0.73942	2.05869	1.93753	1.93272	1.47873	3.08568	1.99426	0.00709495	1.06052	up	--	--	--	--	--	--	--	Protein of unknown function (DUF1685)	--	--	--	PREDICTED: uncharacterized protein LOC107061093 [Solanum tuberosum]
gene.Soltu.DM.03G025810.2	20	25	16	164	125	165	14	149	344	0.284028	0.312381	0.212836	2.1003	1.80236	2.15178	0.186107	1.96294	5.13679	0.000374083	2.9586	up	--	--	Cellular Component: mitochondrion (GO:0005739);; Biological Process: RNA splicing (GO:0008380);;	--	--	[R]	General function prediction only	PPR repeat family	Pentatricopeptide repeat-containing protein At3g48250, chloroplastic OS=Arabidopsis thaliana OX=3702 GN=At3g48250 PE=2 SV=1	S	Function unknown	PREDICTED: pentatricopeptide repeat-containing protein At3g48250, chloroplastic [Solanum tuberosum]
gene.Soltu.DM.04G012130.2	818	905	709	1391	1424	1465	4960	5125	4984	26.2667	25.818	21.1805	39.7476	46.1531	42.827	147.706	151.519	166.343	0.00956564	1.97129	up	[H]	Coenzyme transport and metabolism	Molecular Function: methyltransferase activity (GO:0008168);;	--	--	[R]	General function prediction only	Methyltransferase domain	--	S	Function unknown	PREDICTED: putative methyltransferase DDB_G0268948 [Solanum tuberosum]
gene.Soltu.DM.12G009420.1	708	811	729	1965	2045	2036	3323	3694	3127	13.125	13.3621	12.5968	32.4397	38.2898	34.3907	57.1558	63.0758	60.2905	5.94461e-11	1.80495	up	[QV]	Secondary metabolites biosynthesis, transport and catabolism;; Defense mechanisms	Molecular Function: monooxygenase activity (GO:0004497);; Molecular Function: iron ion binding (GO:0005506);; Molecular Function: oxidoreductase activity, acting on paired donors, with incorporation or reduction of molecular oxygen (GO:0016705);; Molecular Function: heme binding (GO:0020037);;	K20562|6.4e-173|spen:107017993|K20562 biphenyl-4-hydroxylase | (RefSeq) cytochrome P450 CYP736A12-like	--	[Q]	Secondary metabolites biosynthesis, transport and catabolism	Cytochrome P450	Cytochrome P450 71AU50 OS=Prunus mume OX=102107 GN=CYP71AU50 PE=2 SV=1	Q	Secondary metabolites biosynthesis, transport and catabolism	hypothetical protein EJD97_023796 [Solanum chilense]
gene.Soltu.DM.09G001580.1	34	59	44	198	185	188	200	171	219	0.412354	0.634914	0.501953	2.16752	2.29646	2.09996	2.27515	1.9285	2.79815	1.19279e-18	2.03797	up	[T]	Signal transduction mechanisms	Molecular Function: protein serine/threonine kinase activity (GO:0004674);; Molecular Function: ATP binding (GO:0005524);; Cellular Component: integral component of membrane (GO:0016021);; Biological Process: recognition of pollen (GO:0048544);;	K13420|2.2e-61|mesc:110601988|K13420 LRR receptor-like serine/threonine-protein kinase FLS2 [EC:2.7.11.1] | (RefSeq) LRR receptor-like serine/threonine-protein kinase FLS2	MAPK signaling pathway - plant (ko04016);; Plant-pathogen interaction (ko04626)	--	--	Protein kinase domain	Putative receptor protein kinase ZmPK1 OS=Zea mays OX=4577 GN=PK1 PE=2 SV=2	T	Signal transduction mechanisms	PREDICTED: LOW QUALITY PROTEIN: putative receptor protein kinase ZmPK1 [Solanum tuberosum]
gene.Soltu.DM.06G021900.1	37	56	39	115	153	151	123	188	163	0.436012	0.590782	0.43068	1.2335	1.85158	1.65452	1.36454	2.0781	2.03716	2.8898e-09	1.71384	up	[ET]	Amino acid transport and metabolism;; Signal transduction mechanisms	Molecular Function: ligand-gated ion channel activity (GO:0015276);; Cellular Component: integral component of membrane (GO:0016021);;	K05387|0.0e+00|sot:102606129|K05387 glutamate receptor, ionotropic, plant | (RefSeq) glutamate receptor 2.8-like	--	[PET]	Inorganic ion transport and metabolism;; Amino acid transport and metabolism;; Signal transduction mechanisms	Receptor family ligand binding region	Glutamate receptor 2.2 OS=Arabidopsis thaliana OX=3702 GN=GLR2.2 PE=2 SV=1	P	Inorganic ion transport and metabolism	PREDICTED: glutamate receptor 2.8-like [Solanum tuberosum]
gene.Soltu.DM.08G027240.1	243	250	210	678	772	1019	434	432	481	8.38057	7.64799	6.73916	20.8312	26.9084	32.0505	13.8829	13.7304	17.2631	9.10642e-06	1.36326	up	--	--	Biological Process: immune system process (GO:0002376);; Biological Process: response to stress (GO:0006950);; Biological Process: defense response (GO:0006952);; Biological Process: immune response (GO:0006955);; Biological Process: response to osmotic stress (GO:0006970);; Biological Process: biological_process (GO:0008150);; Biological Process: response to external stimulus (GO:0009605);; Biol…	K12173|1.9e-26|gmx:100794341|K12173 BRCA1-A complex subunit BRE | (RefSeq) BRISC and BRCA1-A complex member 2	Homologous recombination (ko03440)	--	--	Thaumatin family	Osmotin-like protein OSML13 OS=Solanum commersonii OX=4109 PE=2 SV=1	S	Function unknown	PREDICTED: osmotin-like protein OSML13 [Solanum tuberosum]
gene.Soltu.DM.04G028090.1	19	10	38	51	72	49	150	211	167	0.674748	0.298571	1.26551	1.6212	2.57024	1.57283	4.97091	6.92655	6.17548	0.00251305	2.3361	up	--	--	Cellular Component: integral component of membrane (GO:0016021);;	K07897|1.1e-47|nnu:104599986|K07897 Ras-related protein Rab-7A | (RefSeq) ras-related protein Rab7-like	Endocytosis (ko04144);; Phagosome (ko04145)	--	--	Protein of unknown function (DUF1475)	--	S	Function unknown	PREDICTED: uncharacterized protein LOC102605236 [Solanum tuberosum]
gene.Soltu.DM.06G034460.1	802	890	1063	433	370	483	600	517	447	36.8645	36.3167	45.5011	17.7114	17.1678	20.2093	25.5377	21.8651	21.3449	1.90621e-07	-1.01241	down	--	--	Cellular Component: chloroplast (GO:0009507);; Cellular Component: photosystem II (GO:0009523);; Biological Process: photosynthesis (GO:0015979);; Cellular Component: integral component of membrane (GO:0016021);;	K02721|5.7e-68|sot:102590010|K02721 photosystem II PsbW protein | (RefSeq) photosystem II reaction center W protein, chloroplastic-like	Photosynthesis (ko00195)	--	--	Photosystem II reaction centre W protein (PsbW)	Photosystem II reaction center W protein, chloroplastic OS=Arabidopsis thaliana OX=3702 GN=PSBW PE=1 SV=2	S	Function unknown	PREDICTED: photosystem II reaction center W protein, chloroplastic-like [Solanum tuberosum]
gene.Soltu.DM.01G046030.1	35	20	14	79	76	117	199	182	224	1.96554	0.996327	0.725244	4.00985	4.3511	6.04903	10.5248	9.5313	13.266	5.85001e-06	2.61965	up	[S]	Function unknown	Cellular Component: extracellular region (GO:0005576);;	K13449|1.5e-103|sot:102595432|K13449 pathogenesis-related protein 1 | (RefSeq) basic form of pathogenesis-related protein 1-like	MAPK signaling pathway - plant (ko04016);; Plant hormone signal transduction (ko04075);; Plant-pathogen interaction (ko04626)	[S]	Function unknown	Cysteine-rich secretory protein family	Basic form of pathogenesis-related protein 1 OS=Nicotiana tabacum OX=4097 PE=3 SV=1	S	Function unknown	PREDICTED: basic form of pathogenesis-related protein 1-like [Solanum tuberosum]
gene.Soltu.DM.05G021360.1	25	44	18	206	133	118	40	86	47	0.392141	0.627765	0.266128	2.98466	2.18156	1.74645	0.589466	1.28469	0.791382	0.00598071	1.77655	up	[T]	Signal transduction mechanisms	Molecular Function: ATP binding (GO:0005524);; Cellular Component: integral component of membrane (GO:0016021);; Molecular Function: ATPase activity (GO:0016887);;	K05681|1.2e-67|gmx:100818395|K05681 ATP-binding cassette, subfamily G (WHITE), member 2 | (RefSeq) ABC transporter G family member 5	ABC transporters (ko02010)	[Q]	Secondary metabolites biosynthesis, transport and catabolism	ABC-2 type transporter	ABC transporter G family member 11 OS=Arabidopsis thaliana OX=3702 GN=ABCG11 PE=1 SV=1	V	Defense mechanisms	PREDICTED: ABC transporter G family member 11-like [Solanum tuberosum]
gene.Soltu.DM.06G030480.1	103	87	104	279	268	238	167	137	159	8.84373	6.59653	8.31473	21.3613	23.2726	18.6479	13.2837	10.8241	14.2086	0.00181048	1.00521	up	[R]	General function prediction only	Biological Process: cytokinin biosynthetic process (GO:0009691);; Molecular Function: hydrolase activity (GO:0016787);;	K22522|4.1e-65|sot:102598045|K22522 cytokinin riboside 5'-monophosphate phosphoribohydrolase [EC:3.2.2.-] | (RefSeq) cytokinin riboside 5'-monophosphate phosphoribohydrolase LOG1-like	--	--	--	Possible lysine decarboxylase	Cytokinin riboside 5'-monophosphate phosphoribohydrolase LOG4 OS=Arabidopsis thaliana OX=3702 GN=LOG4 PE=1 SV=1	S	Function unknown	PREDICTED: cytokinin riboside 5'-monophosphate phosphoribohydrolase LOG4-like [Solanum tuberosum]
gene.Soltu.DM.12G020700.1	62	63	86	10	17	2	18	4	11	2.56888	2.34674	3.33759	0.342738	0.692229	0.076392	0.662196	0.133399	0.456813	7.64679e-05	-2.80919	down	--	--	--	--	--	--	--	--	--	L	Replication, recombination and repair	uncharacterized protein LOC107001974 [Solanum pennellii]
gene.Soltu.DM.09G030820.1	53	52	37	305	301	307	723	896	689	0.946313	0.821503	0.604973	4.89015	5.46976	5.03695	12.0776	14.8596	12.902	2.21912e-13	3.46508	up	[QV]	Secondary metabolites biosynthesis, transport and catabolism;; Defense mechanisms	Molecular Function: monooxygenase activity (GO:0004497);; Molecular Function: iron ion binding (GO:0005506);; Molecular Function: oxidoreductase activity, acting on paired donors, with incorporation or reduction of molecular oxygen (GO:0016705);; Molecular Function: heme binding (GO:0020037);;	K23810|1.8e-138|vvi:100855232|K23810 (E)-8-carboxylinalool synthase [EC:1.14.14.-] | (RefSeq) geraniol 8-hydroxylase	Monoterpenoid biosynthesis (ko00902)	[Q]	Secondary metabolites biosynthesis, transport and catabolism	Cytochrome P450	Geraniol 8-hydroxylase OS=Catharanthus roseus OX=4058 GN=CYP76B6 PE=1 SV=1	Q	Secondary metabolites biosynthesis, transport and catabolism	PREDICTED: geraniol 8-hydroxylase-like [Solanum tuberosum]
gene.Soltu.DM.03G015540.1	77	58	81	364	262	357	305	329	323	2.70451	1.7836	2.62844	11.3787	9.28576	11.4231	9.92755	10.6369	11.7997	7.34752e-30	2.0946	up	--	--	Molecular Function: enzyme inhibitor activity (GO:0004857);; Cellular Component: integral component of membrane (GO:0016021);;	K01051|1.0e-18|egu:105045622|K01051 pectinesterase [EC:3.1.1.11] | (RefSeq) pectinesterase-like	Pentose and glucuronate interconversions (ko00040)	--	--	Plant invertase/pectin methylesterase inhibitor	21 kDa protein OS=Daucus carota OX=4039 PE=2 SV=1	S	Function unknown	PREDICTED: 21 kDa protein-like [Solanum tuberosum]
gene.Soltu.DM.02G006840.2	329	432	507	164	137	141	174	234	184	6.02633	7.04362	8.6607	2.6704	2.5258	2.34407	2.95886	3.94768	3.49756	8.21512e-08	-1.34768	down	--	--	--	--	--	--	--	--	--	S	Function unknown	PREDICTED: uncharacterized protein LOC102581404 [Solanum tuberosum]
gene.Soltu.DM.01G005870.1	0	0	0	40	84	33	0	23	17	0	0	0	1.22235	2.94691	1.0254	0	0.718319	0.607044	0.000204954	7.40913	up	--	--	Molecular Function: transcription factor activity, sequence-specific DNA binding (GO:0003700);; Biological Process: positive regulation of transcription, DNA-templated (GO:0045893);;	K14432|6.7e-70|sly:101255230|K14432 ABA responsive element binding factor | (RefSeq) LOW QUALITY PROTEIN: ABSCISIC ACID-INSENSITIVE 5-like protein 2	Plant hormone signal transduction (ko04075)	--	--	bZIP transcription factor	ABSCISIC ACID-INSENSITIVE 5-like protein 2 OS=Arabidopsis thaliana OX=3702 GN=DPBF3 PE=1 SV=1	--	--	LOW QUALITY PROTEIN: ABSCISIC ACID-INSENSITIVE 5-like protein 2 [Solanum lycopersicum]
gene.Soltu.DM.06G032720.1	226	258	242	90	141	137	98	148	96	3.97277	4.02761	3.95428	1.40941	2.49951	2.18421	1.58535	2.39178	1.74128	3.81631e-06	-1.09394	down	--	--	Cellular Component: integral component of membrane (GO:0016021);;	--	--	--	--	Nodulin-like	Protein NUCLEAR FUSION DEFECTIVE 4 OS=Arabidopsis thaliana OX=3702 GN=NFD4 PE=3 SV=1	S	Function unknown	PREDICTED: protein NUCLEAR FUSION DEFECTIVE 4 [Solanum tuberosum]
gene.Soltu.DM.01G030410.1	58	94	55	198	193	139	133	116	133	3.18854	4.56908	2.77318	9.6591	10.6673	6.9504	6.74628	5.84596	7.55766	0.000321781	1.08792	up	--	--	Cellular Component: integral component of membrane (GO:0016021);;	K20359|3.7e-60|nau:109240683|K20359 PRA1 family protein 1 | (RefSeq) uncharacterized protein LOC109240683	--	--	--	PRA1 family protein	--	S	Function unknown	hypothetical protein EJD97_015307 [Solanum chilense]
gene.Soltu.DM.10G005080.1	66	98	60	24	30	12	3	12	14	3.88487	5.17213	3.29279	1.25381	1.75099	0.642185	0.143894	0.606434	0.837264	0.000571309	-2.28971	down	--	--	--	--	--	--	--	Organ specific protein	--	S	Function unknown	PREDICTED: organ-specific protein S2-like, partial [Solanum tuberosum]
gene.Soltu.DM.11G002020.1	45	34	38	83	71	80	128	144	104	2.18432	1.47975	1.72087	3.60518	3.50963	3.59003	5.84516	6.5277	5.29501	0.000971478	1.31861	up	[G]	Carbohydrate transport and metabolism	Molecular Function: zinc ion binding (GO:0008270);; Molecular Function: oxidoreductase activity (GO:0016491);;	K23232|2.9e-114|sot:102600145|K23232 8-hydroxygeraniol dehydrogenase [EC:1.1.1.324] | (RefSeq) 8-hydroxygeraniol dehydrogenase-like	Monoterpenoid biosynthesis (ko00902)	[Q]	Secondary metabolites biosynthesis, transport and catabolism	Alcohol dehydrogenase GroES-like domain	8-hydroxygeraniol dehydrogenase OS=Catharanthus roseus OX=4058 GN=10HGO PE=1 SV=1	C	Energy production and conversion	PREDICTED: 8-hydroxygeraniol dehydrogenase-like [Solanum tuberosum]
gene.Soltu.DM.02G033060.1	10	9	8	40	34	80	19	32	33	0.227133	0.177693	0.164809	0.827304	0.793178	1.70636	0.407587	0.68225	0.784441	0.000999694	2.05481	up	--	--	Molecular Function: hydrolase activity, hydrolyzing O-glycosyl compounds (GO:0004553);; Biological Process: carbohydrate metabolic process (GO:0005975);;	K19891|1.2e-56|ath:AT2G01630|K19891 glucan endo-1,3-beta-glucosidase 1/2/3 [EC:3.2.1.39] | (RefSeq) O-Glycosyl hydrolases family 17 protein	Starch and sucrose metabolism (ko00500)	--	--	Glycosyl hydrolases family 17	Glucan endo-1,3-beta-glucosidase, acidic isoform GI9 OS=Nicotiana tabacum OX=4097 GN=PR2 PE=1 SV=1	S	Function unknown	glucan endo-1,3-beta-glucosidase, acidic isoform GI9-like precursor [Solanum tuberosum]
Solanum_tuberosum_newGene_4135	63	81	44	15	25	26	13	38	14	2.23293	2.41062	1.35724	0.424697	0.839523	0.786774	0.378669	1.1682	0.463286	0.00196191	-1.58232	down	--	--	--	--	--	--	--	--	--	--	--	PREDICTED: replication protein A 70 kDa DNA-binding subunit B-like [Solanum tuberosum]
gene.Soltu.DM.01G031960.1	632	807	733	154	88	184	214	211	284	13.883	15.7482	15.0045	3.00961	1.93993	3.67006	4.36069	4.26587	6.46945	5.99107e-08	-1.97321	down	--	--	Molecular Function: iron ion binding (GO:0005506);; Biological Process: lipid biosynthetic process (GO:0008610);; Cellular Component: integral component of membrane (GO:0016021);; Molecular Function: oxidoreductase activity (GO:0016491);;	K14423|2.7e-174|sot:102606141|K14423 plant 4,4-dimethylsterol C-4alpha-methyl-monooxygenase [EC:1.14.18.10] | (RefSeq) methylsterol monooxygenase 1-1-like	Steroid biosynthesis (ko00100)	[I]	Lipid transport and metabolism	Fatty acid hydroxylase superfamily	Methylsterol monooxygenase 1-1 OS=Arabidopsis thaliana OX=3702 GN=SMO1-1 PE=1 SV=1	I	Lipid transport and metabolism	PREDICTED: methylsterol monooxygenase 1-1-like [Solanum tuberosum]
gene.Soltu.DM.02G016880.1	237	176	211	609	490	590	526	565	482	5.67718	3.73427	4.70417	13.0031	11.8684	12.8869	11.6974	12.4823	12.0262	8.04289e-21	1.30942	up	[H]	Coenzyme transport and metabolism	Molecular Function: O-methyltransferase activity (GO:0008171);; Biological Process: methylation (GO:0032259);; Molecular Function: protein dimerization activity (GO:0046983);;	K16040|4.6e-128|qsu:111989184|K16040 trans-resveratrol di-O-methyltransferase [EC:2.1.1.240] | (RefSeq) trans-resveratrol di-O-methyltransferase-like	Stilbenoid, diarylheptanoid and gingerol biosynthesis (ko00945)	[R]	General function prediction only	O-methyltransferase domain	Trans-resveratrol di-O-methyltransferase OS=Vitis vinifera OX=29760 GN=ROMT PE=1 SV=2	S	Function unknown	PREDICTED: trans-resveratrol di-O-methyltransferase-like isoform X1 [Solanum tuberosum]
gene.Soltu.DM.09G025390.1	27	25	21	73	46	79	67	55	40	0.863238	0.697455	0.62356	2.07856	1.49264	2.29105	2.00179	1.61131	1.34054	0.000529959	1.22292	up	[QV]	Secondary metabolites biosynthesis, transport and catabolism;; Defense mechanisms	Molecular Function: monooxygenase activity (GO:0004497);; Molecular Function: iron ion binding (GO:0005506);; Cellular Component: integral component of membrane (GO:0016021);; Molecular Function: oxidoreductase activity, acting on paired donors, with incorporation or reduction of molecular oxygen (GO:0016705);; Molecular Function: heme binding (GO:0020037);;	K07426|1.6e-95|cpep:111792333|K07426 cytochrome P450 family 4 subfamily B polypeptide 1 [EC:1.14.14.1] | (RefSeq) cytochrome P450 CYP72A219-like	--	[QI]	Secondary metabolites biosynthesis, transport and catabolism;; Lipid transport and metabolism	Cytochrome P450	Cytochrome P450 CYP72A219 OS=Panax ginseng OX=4054 PE=2 SV=1	Q	Secondary metabolites biosynthesis, transport and catabolism	PREDICTED: cytochrome P450 CYP72A219-like [Solanum tuberosum]
gene.Soltu.DM.11G022780.1	16	30	17	119	110	173	93	86	66	0.538493	0.890578	0.529616	3.62412	3.78765	5.384	2.9382	2.69409	2.34574	1.24409e-09	2.2927	up	--	--	--	--	--	--	--	--	Kiwellin OS=Actinidia chinensis var. chinensis OX=1590841 GN=KWL1 PE=1 SV=2	S	Function unknown	PREDICTED: kiwellin-like [Solanum tuberosum]
gene.Soltu.DM.01G045030.1	189	347	257	16	67	61	51	57	52	4.54847	7.44811	5.77708	0.339927	1.62747	1.32355	1.12891	1.25685	1.29714	5.16553e-08	-2.41172	down	--	--	--	--	--	--	--	--	--	S	Function unknown	protein PELPK1-like [Solanum pennellii]
gene.Soltu.DM.07G019570.1	48	70	69	293	239	273	910	929	833	1.17853	1.50802	1.56485	6.4056	5.91211	6.0942	20.7171	20.9913	21.2605	1.82974e-08	3.19573	up	[E]	Amino acid transport and metabolism	Biological Process: cellular amino acid metabolic process (GO:0006520);; Molecular Function: carboxy-lyase activity (GO:0016831);; Molecular Function: pyridoxal phosphate binding (GO:0030170);;	K01593|4.3e-250|sot:102592946|K01593 aromatic-L-amino-acid/L-tryptophan decarboxylase [EC:4.1.1.28 4.1.1.105] | (RefSeq) aromatic-L-amino-acid decarboxylase-like	Tyrosine metabolism (ko00350);; Phenylalanine metabolism (ko00360);; Tryptophan metabolism (ko00380);; Isoquinoline alkaloid biosynthesis (ko00950);; Betalain biosynthesis (ko00965)	[E]	Amino acid transport and metabolism	Pyridoxal-dependent decarboxylase conserved domain	Tryptophan decarboxylase TDC1 OS=Camptotheca acuminata OX=16922 GN=TDC1 PE=1 SV=1	E	Amino acid transport and metabolism	PREDICTED: aromatic-L-amino-acid decarboxylase-like [Solanum tuberosum]
gene.Soltu.DM.12G011240.1	18	34	15	56	88	79	75	65	67	0.360769	0.634355	0.291012	1.03482	1.84998	1.50545	1.45608	1.25891	1.44828	1.06981e-05	1.64147	up	[QV]	Secondary metabolites biosynthesis, transport and catabolism;; Defense mechanisms	Molecular Function: monooxygenase activity (GO:0004497);; Molecular Function: iron ion binding (GO:0005506);; Molecular Function: oxidoreductase activity, acting on paired donors, with incorporation or reduction of molecular oxygen (GO:0016705);; Molecular Function: heme binding (GO:0020037);;	K20562|2.9e-181|cann:107870189|K20562 biphenyl-4-hydroxylase | (RefSeq) cytochrome P450 CYP736A12-like	--	[Q]	Secondary metabolites biosynthesis, transport and catabolism	Cytochrome P450	Cytochrome P450 71AU50 OS=Prunus mume OX=102107 GN=CYP71AU50 PE=2 SV=1	Q	Secondary metabolites biosynthesis, transport and catabolism	PREDICTED: cytochrome P450 CYP736A12-like [Solanum tuberosum]
Solanum_tuberosum_newGene_548	14	7	5	2039	1851	1811	116	56	107	0.074975	0.03069	0.021435	11.5121	11.7037	9.99263	0.710802	0.561362	0.652434	4.62252e-07	6.70111	up	--	--	--	--	--	--	--	--	--	L	Replication, recombination and repair	PREDICTED: uncharacterized protein LOC104238963 [Nicotiana sylvestris]
Solanum_tuberosum_newGene_5063	46	73	40	7	3	4	9	4	6	0.817524	1.12319	0.635581	0.099455	0.040378	0.053731	0.139746	0.061658	0.093258	1.2854e-10	-3.31537	down	--	--	--	K21594|2.24e-08|qsu:112015518|K21594 translation factor GUF1, mitochondrial [EC:3.6.5.-] | (RefSeq) translation factor GUF1 homolog, chloroplastic-like	--	--	--	--	--	S	Function unknown	PREDICTED: exodeoxyribonuclease-like, partial [Nicotiana tabacum]
gene.Soltu.DM.04G001340.1	2387	2575	2377	1059	905	914	1558	1717	1428	21.5624	20.6563	19.9883	8.50641	8.24467	7.51033	13.0453	14.2678	13.4024	0.00057014	-1.00205	down	[C]	Energy production and conversion	Biological Process: tricarboxylic acid cycle (GO:0006099);; Molecular Function: phosphoenolpyruvate carboxylase activity (GO:0008964);; Biological Process: carbon fixation (GO:0015977);;	K01595|0.0e+00|sot:102586589|K01595 phosphoenolpyruvate carboxylase [EC:4.1.1.31] | (RefSeq) phosphoenolpyruvate carboxylase 4	Pyruvate metabolism (ko00620);; Carbon fixation in photosynthetic organisms (ko00710);; Carbon metabolism (ko01200)	--	--	Phosphoenolpyruvate carboxylase	Phosphoenolpyruvate carboxylase 4 OS=Arabidopsis thaliana OX=3702 GN=PPC4 PE=2 SV=1	C	Energy production and conversion	PREDICTED: phosphoenolpyruvate carboxylase 4 [Solanum tuberosum]
gene.Soltu.DM.01G044280.1	28042	32910	31553	20779	18273	20444	12508	11645	10534	902.895	940.762	945.781	595.271	593.525	599.184	373.262	344.991	352.331	7.70129e-07	-1.05248	down	--	--	Cellular Component: photosystem I (GO:0009522);; Cellular Component: photosystem II (GO:0009523);; Cellular Component: chloroplast thylakoid membrane (GO:0009535);; Biological Process: photosynthesis, light harvesting (GO:0009765);; Cellular Component: integral component of membrane (GO:0016021);; Molecular Function: chlorophyll binding (GO:0016168);; Biological Process: protein-chromophore linka…	K08917|1.6e-146|sot:102586172|K08917 light-harvesting complex II chlorophyll a/b binding protein 6 | (RefSeq) chlorophyll a-b binding protein CP24 10B, chloroplastic	Photosynthesis - antenna proteins (ko00196)	--	--	Chlorophyll A-B binding protein	Chlorophyll a-b binding protein CP24 10B, chloroplastic OS=Solanum lycopersicum OX=4081 GN=CAP10B PE=3 SV=1	S	Function unknown	PREDICTED: chlorophyll a-b binding protein CP24 10B, chloroplastic [Solanum tuberosum]
gene.Soltu.DM.01G008360.1	53	68	78	182	170	140	111	179	138	1.19132	1.36387	1.62988	3.66105	3.86545	2.86508	2.31345	3.70857	3.23717	5.3736e-06	1.14546	up	--	--	--	--	--	--	--	Domain of unknown function (DUF569)	--	S	Function unknown	uncharacterized protein LOC107007957 [Solanum pennellii]
gene.Soltu.DM.01G029520.2	108	188	75	46	9	15	1	23	24	1.86678	2.89355	1.21202	0.708696	0.155662	0.232163	0.014999	0.364147	0.431198	0.00231466	-2.71534	down	[E]	Amino acid transport and metabolism	Cellular Component: integral component of membrane (GO:0016021);; Molecular Function: transmembrane transporter activity (GO:0022857);;	K14638|6.1e-307|sot:102604984|K14638 solute carrier family 15 (peptide/histidine transporter), member 3/4 | (RefSeq) protein NRT1/ PTR FAMILY 7.3-like	--	[E]	Amino acid transport and metabolism	POT family	Protein NRT1/ PTR FAMILY 7.3 OS=Arabidopsis thaliana OX=3702 GN=NPF7.3 PE=1 SV=2	E	Amino acid transport and metabolism	PREDICTED: protein NRT1/ PTR FAMILY 7.3-like [Solanum tuberosum]
gene.Soltu.DM.11G008790.1	584	475	616	1682	1352	1700	2761	2913	2921	27.3002	19.74	26.8435	70.0247	63.8366	72.4219	119.792	125.459	142.057	4.18202e-09	1.94011	up	--	--	--	K14948|4.4e-25|jre:109009978|K14948 polypyrimidine tract-binding protein 2 | (RefSeq) polypyrimidine tract-binding protein homolog 3-like isoform X1	--	--	--	Alginate lyase	Citrate-binding protein OS=Hevea brasiliensis OX=3981 GN=CBP PE=1 SV=1	S	Function unknown	PREDICTED: citrate-binding protein-like [Solanum tuberosum]
gene.Soltu.DM.12G002180.1	24	32	24	84	61	85	106	106	78	0.293071	0.347715	0.275993	0.930553	0.763134	0.966223	1.2314	1.22497	1.0079	1.24859e-07	1.642	up	--	--	Molecular Function: structural constituent of cell wall (GO:0005199);; Biological Process: plant-type cell wall organization (GO:0009664);;	--	--	--	--	Pollen protein Ole e 1 like	--	S	Function unknown	PREDICTED: extensin-2-like [Solanum tuberosum]
gene.Soltu.DM.03G016850.2	0	0	0	25	84	77	40	40	78	0	0	0	0.50103	1.96695	1.63075	0.868376	0.858515	1.88691	8.87061e-09	8.24683	up	--	--	Cellular Component: chloroplast (GO:0009507);; Biological Process: cytochrome b6f complex assembly (GO:0010190);;	--	--	--	--	Cofactor assembly of complex C subunit B, CCB2/CCB4	Protein COFACTOR ASSEMBLY OF COMPLEX C SUBUNIT B CCB2, chloroplastic OS=Arabidopsis thaliana OX=3702 GN=CCB2 PE=1 SV=1	S	Function unknown	PREDICTED: protein COFACTOR ASSEMBLY OF COMPLEX C SUBUNIT B CCB2, chloroplastic isoform X1 [Solanum tuberosum]
gene.Soltu.DM.01G006600.1	8	17	12	47	24	42	32	36	39	0.273576	0.552406	0.40363	1.54614	0.864792	1.40989	1.06414	1.21224	1.49801	0.000903701	1.51555	up	--	--	Cellular Component: integral component of membrane (GO:0016021);;	K13466|2.7e-35|fve:101315391|K13466 EIX receptor 1/2 | (RefSeq) probable LRR receptor-like serine/threonine-protein kinase At1g34110	Plant-pathogen interaction (ko04626)	[R]	General function prediction only	Leucine rich repeat	Receptor-like protein EIX2 OS=Solanum lycopersicum OX=4081 GN=EIX2 PE=1 SV=2	S	Function unknown	PREDICTED: LRR receptor-like serine/threonine-protein kinase FLS2 [Solanum tuberosum]
gene.Soltu.DM.06G032370.1	71	72	125	237	210	246	211	202	128	1.39086	1.25689	2.28146	4.13119	4.1552	4.39663	3.83772	3.64915	2.6012	8.78943e-05	1.12102	up	[T]	Signal transduction mechanisms	Molecular Function: protein serine/threonine phosphatase activity (GO:0004722);; Molecular Function: metal ion binding (GO:0046872);;	K17506|3.4e-206|sot:102591678|K17506 protein phosphatase 1L [EC:3.1.3.16] | (RefSeq) probable protein phosphatase 2C 25	--	[T]	Signal transduction mechanisms	Protein phosphatase 2C	Probable protein phosphatase 2C 25 OS=Arabidopsis thaliana OX=3702 GN=At2g30020 PE=1 SV=1	T	Signal transduction mechanisms	PREDICTED: probable protein phosphatase 2C 25 [Solanum tuberosum]
gene.Soltu.DM.01G046580.1	1736	2017	1782	1019	907	1038	847	1011	722	56.5773	58.3687	54.0712	29.5355	29.7986	30.7913	25.5655	30.3217	24.4176	2.05185e-49	-1.06556	down	--	--	--	--	--	--	--	Lateral organ boundaries (LOB) domain	LOB domain-containing protein 37 OS=Arabidopsis thaliana OX=3702 GN=LBD37 PE=2 SV=1	--	--	PREDICTED: LOB domain-containing protein 37-like [Solanum tuberosum]
gene.Soltu.DM.03G004550.1	45	49	57	39	23	27	21	15	22	1.13562	1.08721	1.3333	0.869585	0.579142	0.602112	0.48416	0.345039	0.572235	0.00661596	-1.11279	down	[E]	Amino acid transport and metabolism	Biological Process: glutamine metabolic process (GO:0006541);; Molecular Function: hydrolase activity (GO:0016787);;	--	--	--	--	Peptidase C26	Putative glutamine amidotransferase GAT1_2.1 OS=Arabidopsis thaliana OX=3702 GN=GAT1_2.1 PE=2 SV=1	S	Function unknown	PREDICTED: protein NtpR-like [Solanum tuberosum]
gene.Soltu.DM.02G016770.1	204	394	222	150	94	157	28	56	32	4.31252	7.40286	4.37793	2.81367	2.00735	3.01359	0.544582	1.09004	0.695381	0.00709488	-1.75342	down	[I]	Lipid transport and metabolism	Biological Process: lipid metabolic process (GO:0006629);; Molecular Function: phosphatidylcholine 1-acylhydrolase activity (GO:0008970);;	K16818|4.7e-49|gmx:100817287|K16818 phospholipase A1 [EC:3.1.1.32] | (RefSeq) phospholipase A(1) DAD1, chloroplastic	Glycerophospholipid metabolism (ko00564);; alpha-Linolenic acid metabolism (ko00592)	[I]	Lipid transport and metabolism	Lipase (class 3)	Phospholipase A1-IIgamma OS=Arabidopsis thaliana OX=3702 GN=DSEL PE=1 SV=1	S	Function unknown	PREDICTED: phospholipase A1-IIgamma-like [Solanum tuberosum]
[truncated: 155 more rows]
